# Supplementary material for: High Expression of PPM1D Induces Tumors Phenotypically Similar to TP53 Loss-of-Function Mutations in Mice
Source: MDPI journal article supplement (doi:10.3390/cancers13215493), 2021-10-31

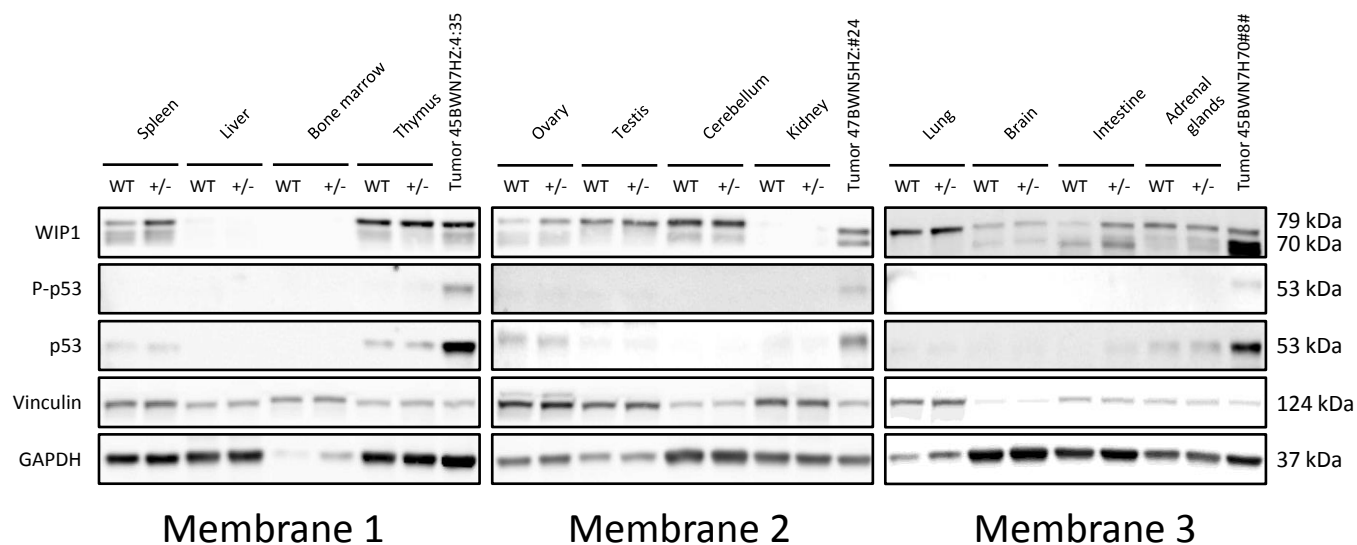

**Figure X. Protein expression in mouse tissues.** Protein expression level of WIP1, p53<sup>Ser15</sup> phosphorylation and total p53 (rodent specific) were analyzed in wild type (WT) and heterozygous (+/-) mouse tissues. Three different tumor samples were also included. Vinculin and GAPDH levels were used as loading controls

COMPLETE MEMBRANE IMAGES FOR MOUSE TISSUES

Membrane 1: Spleen, Liver, Bone marrow, Thymus, Tumor 1

Membrane 2: Ovary, Testis, Cerebellum, Kidney, Tumor 2

Membrane 3: Lung, Brain, Intestine, Adrenal glands, Tumor 3

Membrane 1 images

WIP1 analysis including the corresponding Vinculin and GAPDH detection

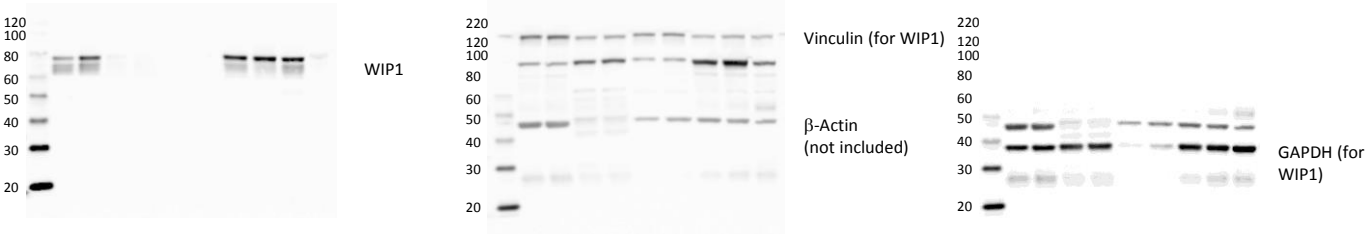

P-p53 and total p53 (rodent specific) analysis including the corresponding Vinculin and GAPDH detection

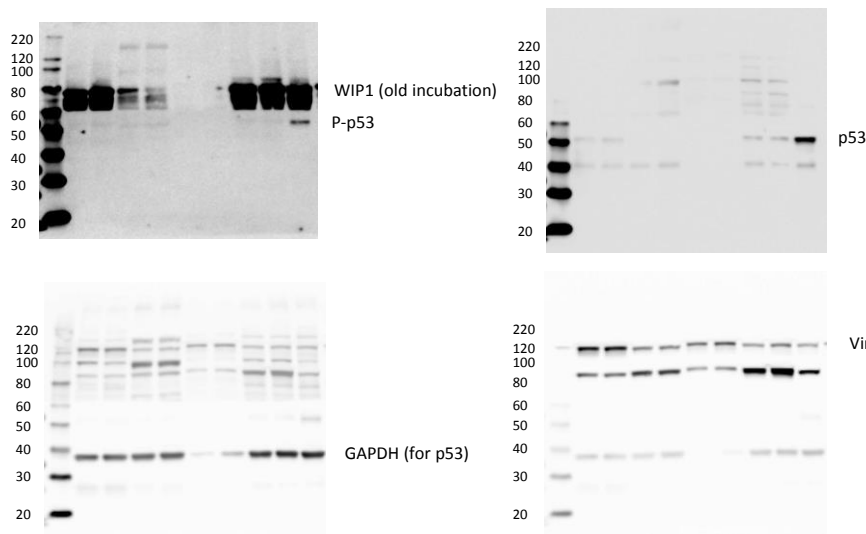

COMPLETE MEMBRANE IMAGES FOR MOUSE TISSUES

Membrane 2 images

WIP1 analysis including the corresponding Vinculin and GAPDH detection

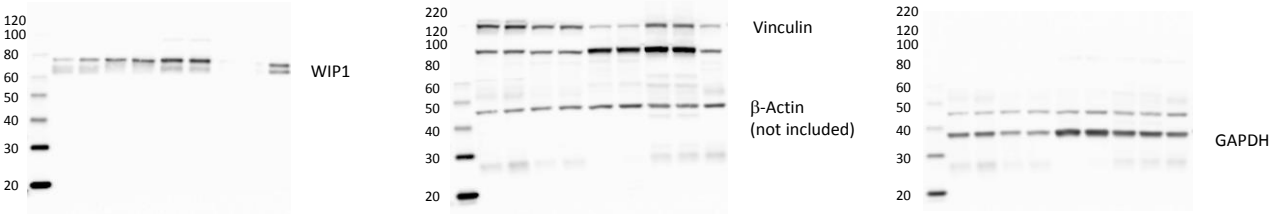

P-p53 and total p53 (rodent specific) analysis including the corresponding Vinculin and GAPDH detection

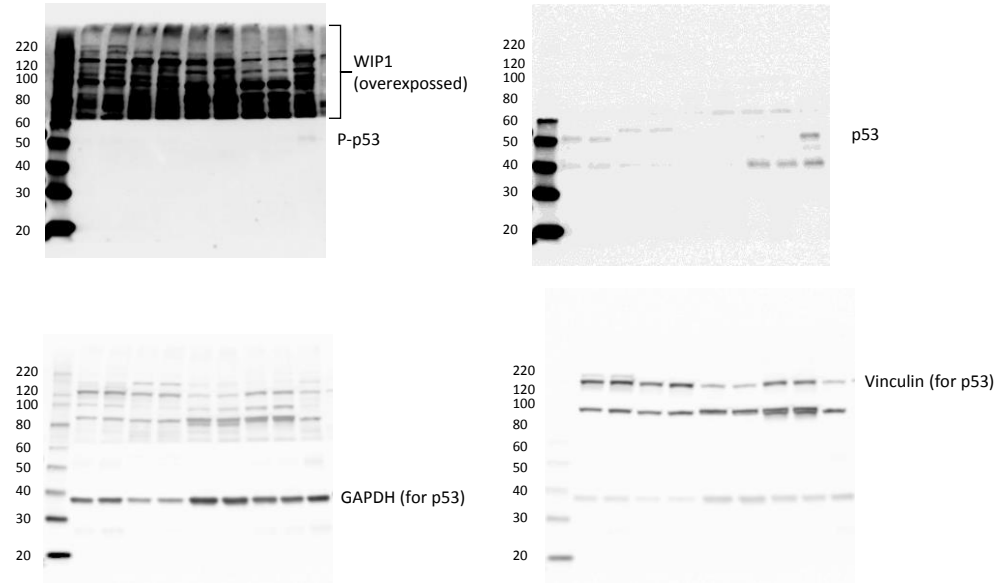

COMPLETE MEMBRANE IMAGES FOR MOUSE TISSUES

Membrane 3 images

WIP1 analysis including the corresponding Vinculin and GAPDH detection

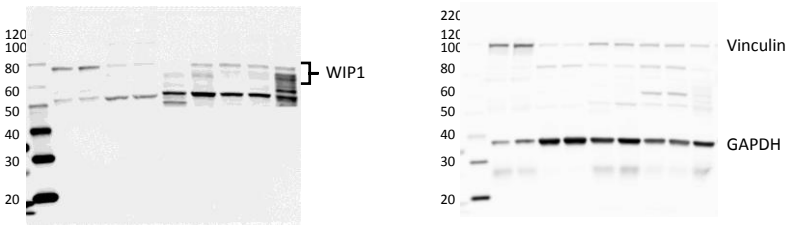

P-p53 and total p53 (rodent specific) analysis including the corresponding Vinculin and GAPDH detection

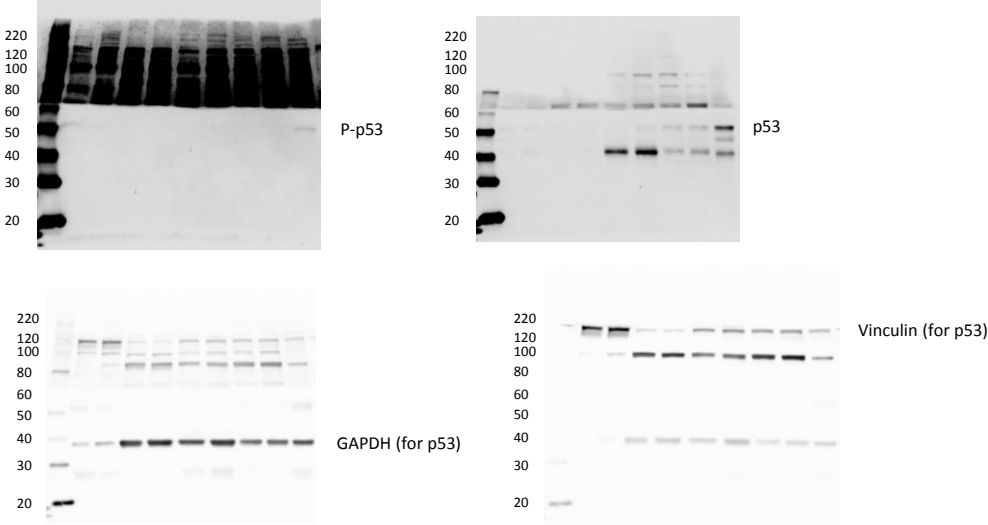

Supplement: s1 [file s1]
