# Supplementary material for: High Expression of PPM1D Induces Tumors Phenotypically Similar to TP53 Loss-of-Function Mutations in Mice
Source: Cancers (Basel). 2021 Oct 31;13(21):5493. doi: 10.3390/cancers13215493 (PMC8582939; doi:10.3390/cancers13215493)
Supplement: Supplementary file 1 [file cancers-13-05493-s001.zip]

Archive with 5 entries (5 files):
- Figure 1B and File S1, WB Tg-PPM1D tissues_complete membs.pdf
- Supp Figure S1.pdf
- Supp Table S1 (related to Fig 3).xlsx
- Supp Table S2 (related to Fig 3).xlsx
- Supp Table S3 (related to materials and methods).xlsx
