# Supplementary material for: High Expression of PPM1D Induces Tumors Phenotypically Similar to TP53 Loss-of-Function Mutations in Mice
Source: Cancers (Basel). 2021 Oct 31;13(21):5493. doi: 10.3390/cancers13215493 (PMC8582939; doi:10.3390/cancers13215493)
Supplement: Supplementary file 1 [file cancers-13-05493-s001.zip › Supp Table S1 (related to Fig 3).xlsx]

## Sheet: Table S1 - Summary exome
Table S1. Summary of relevant genomic alteration detected through WES, Related to Figure 3.
			Notch1		Pten
	Sample-ID	No somatic SNVs	Variants	Expression value	Variants	Expression value	Variants in other genes of specific interest		FIGURE SAMPLE NAME	OTOGENETICS EXOME SEQ ID	OTOGENETICS RNA SEQ ID
Lymphoma developed in IRR WIP1	14	20	-	16 633	Del; chr19:32,69- 32,79Mb fr pter	245	Zfp36l2 (p.Thr196Ala)		T2	Index14_OtB8294	Index1_OtB8318
	15	34	-	16 258	Del exon 1	598			T3	Index15_OtB8295	Index2_OtB8319
	16	32	-	409	Del exon 1-2	114	Ikzf1 (p.Tyr180Cys)		T6	Index16_OtB8296	Index3_OtB8592
	17	17	p.Arg2361fs; p.Ile1670Asn	22 019	Del exon 2-9	331	Mpdz (p.Pro227Leu)		T8	Index17_OtB8297	Index2_OtB8321
	18	19	-	561	-	5 146	Ctnnb1 (p.Ser45Tyr), Pin1 (p.Thr29Pro)		T24	Index18_OtB8298	Index3_OtB8322
	19	10	p.Gln2382*; p.Ile1670Asn	40 110	-	3 581	Trp53 (p.Arg270His)		T25	Index19_OtB8299	Index4_OtB8323
	20	9	p.Asp1546Gly	18 742	Del exon 6-9	1 729	Ddx3x (p.Glu423Gly)		T13	Index20_OtB8300	Index5_OtB8324
	21	21	p.Leu1668Pro	NA	p.Arg14fs	NA	Foxp1 (p.Gln42Arg)		T14	Index21_OtB8301	NO DATA AVAILABLE
	22	25	p.Ala2283fs	23 940	-	3 428	Rac2 (p.Gly12Arg), Ezh2(p.Leu502fs)		T16	Index22_OtB8302	Index6_OtB8326
	23	20	Gly2323fs; Leu1668Pro; p.Ile2352fs	31 325	p.Asp22Gly	4 181a			T17	Index23_OtB8303	Index7_OtB8327
	24	10	-	14 221	Del; chr19:32,7-33,2Mb fr pter	160	Ikzf1 (p.Arg51*)		T19	Index24_OtB8304	Index8_OtB8328
	25	10	p.Ser2475fs	23 892	Del exon 1	138			T22	Index25_OtB8305	Index9_OtB8329
	26	10	p.Gln2297*; p.Ala1686Asp	52 587	Del exon 1	205			T27	Index26_OtB8306	Index10_OtB8330
	27	19	p.Phe1692Ser; p.Tyr2313fs	20 483	Del; chr19:30,8-33,65Mb fr pter	709	Gli3 (p.Gln451His)		T33	Index27_OtB8307	Index11_OtB8331
	28	12	-	27 260	p.Ser170Ile	3 148a	Kras (p.Lys117Asn)		T35	Index28_OtB8308	Index12_OtB8332
Non-IRR WT	29	-	-	4 080		6 286			C1C	Index29_OtB8309	Index13_OtB8333
	30	-	-	1 784		2 978			C2B	Index29_OtB8310	Index14_OtB8334
	31	-	-	3 278		6 003			C3A	Index31_OtB8311	Index15_OtB8335
IRR WT	32	4	-	3 890		5 013			C7B	Index32_OtB8312	Index20_OtB8339
	33	1	-	4 215		5 429			C8A	Index33_OtB8313	Index21_OtB8340
	34	2	-	2 293		3 259			C9A	Index34_OtB8314	Index22_OtB8341	Was sequenced (RNAseq) but excluded due to poor raw data quality
IRR WIP1	35	3	-	3 706		4 920			C10A	Index35_OtB8315	Index23_OtB8342
	36	5	-	5 455		5 182			C11A	Index36_OtB8316	Index25_OtB8343
	37	1	-	1 389		2 898			C12A	Index37_OtB8317	Index27_OtB8344	Was sequenced (RNAseq) but excluded due to poor raw data quality
amonoallelic expression of Pten missense variant
									C4	NO DATA AVAILABLE	Index16_OtB8336
									C5	NO DATA AVAILABLE	Index18_OtB8337
									C6	NO DATA AVAILABLE	Index19_OtB8338
		Average no somatic mut			P-value (t-test)	Grupp
	Tumors	17.8667	range (9-34)		0.00473733	Tumors vs Irr wt
	Irr wt	2.33333	range (1-4)		0.00644501	Tumors vs Irr WIP1
	Irr WIP1	3	range (1-5)		0.000216826	Tumors vs Irr WT +Irr WIP1
	Strain 45	24.4
	Strain 42	17
	Strain 47	12.2
	Strain 42+45	20.7
	Strain 47	12.2

## Sheet: Table S1-All variants
Table S1. Non-synonymous variants in sequenced samples, Related to Figure 3.
	Sample ID	Gene	Chr	Position (mm10)	Type	Ref	Var	Amino acid change in longest transcript	cDNA change in longest transcript	cDNA change	Amino acid change	Coverage	Var Freq	Average quality	Homopolymer	QUAL	Control coverage	Control count	Control freq	conservation score	Gene	Description	Alias	Comments and relevant references	Present in RNAseq	Strain
Lymphoma developed in IRR WIP1	14	Fmo2	1	162886356	SNV	T	A	XP_006497012.1:p.Asn194Tyr	XM_006496949.3:c.580A>T	XM_006496949.3:c.[580A>T]; NM_018881.3:c.[580A>T]	XP_006497012.1:p.[Asn194Tyr]; NP_061369.2:p.[Asn194Tyr]	68	48.5294	38.0606	No	200	120	1	0.0083	1	Fmo2	flavin containing monooxygenase 2	2310008D08Rik, 2310042I22Rik, AW107733		No coverage	45
	14	Ush2a	1	188626697	SNV	C	T	NP_067383.3:p.Pro2140Leu	NM_021408.3:c.6419C>T	XM_017319869.1:c.[614C>T]; NM_021408.3:c.[6419C>T]	XP_017175358.1:p.[Pro205Leu]; NP_067383.3:p.[Pro2140Leu]	60	51.6667	38.3226	No	200	134	0	0	0.958	Ush2a	Usher syndrome 2A	A930011D15Rik, A930037M10Rik, Gm676, Gm983, Mush2a, Usherin, Ushrn	Analysis of pediatric B-acute lymphoblastic leukaemias showed that NT5C2, CREBBP, WHSC1, TP53, USH2A, NRAS and IKZF1 mutations were enriched at relapse (PMID: 25790293)	Gene not expressed	45
	14	Hmcn2	2	31356325	SNV	G	A	XP_006498564.1:p.Val769Met	XM_006498501.3:c.2305G>A	XM_006498503.3:c.[2305G>A]; XM_006498501.3:c.[2305G>A]; XM_006498504.1:c.[1840G>A]; XM_006498502.3:c.[2305G>A]; XM_006498505.3:c.[2305G>A]	XP_006498566.1:p.[Val769Met]; XP_006498564.1:p.[Val769Met]; XP_006498567.1:p.[Val614Met]; XP_006498565.1:p.[Val769Met]; XP_006498568.1:p.[Val769Met]	22	77.2727	37.8824	No	200	52	1	0.0192	0.085	Hmcn2				Gene not expressed	45
	14	Ddb2	2	91218847	SNV	G	T	NP_082395.2:p.Leu167Ile	NM_028119.5:c.499C>A	XM_006498547.3:c.[457-6233C>A]; NM_028119.5:c.[499C>A]	NP_082395.2:p.Leu167Ile	87	59.7701	37.3654	No	200	145	0	0	1	Ddb2	damage specific DNA binding protein 2	2610043A19Rik	Damaged DNA-binding protein 2, a nuclear protein, participates in both nucleotide excision repair and mRNA transcription but has also been described to be critical for β-catenin-mediated activation of RNF43, which restricts Wnt signaling by removing Wnt receptors from the cell surface (PMID: 29021137)	Expressed in 36% of 36 reads	45
	14	Gnas	2	174345683	SNV	A	G	XP_006498843.1:p.Asn1016Asp	XM_006498780.1:c.3046A>G	XM_006498780.1:c.[3046A>G]; XM_006498778.2:c.[733A>G]; XM_006498776.1:c.[829A>G]; NM_010309.4:c.[3091A>G]; NM_001310083.1:c.[874A>G]; NM_001310085.1:c.[*702A>G]; XM_006498777.2:c.[781A>G]; NM_001077507.2:c.[3049A>G]; NM_201616.2:c.[874A>G]; XM_017315658.1:c.[697A>G]; NM_001077510.4:c.[832A>G]; XM_006498774.1:c.[877A>G]; NM_022000.3:c.[*777A>G]	XP_006498843.1:p.[Asn1016Asp]; XP_006498841.1:p.[Asn245Asp]; XP_006498839.1:p.[Asn277Asp]; NP_034439.2:p.[Asn1031Asp]; NP_001297012.1:p.[Asn292Asp]; XP_006498840.1:p.[Asn261Asp]; NP_001070975.1:p.[Asn1017Asp]; NP_963910.1:p.[Asn292Asp]; XP_017171147.1:p.[Asn233Asp]; NP_001070978.1:p.[Asn278Asp]; XP_006498837.1:p.[Asn293Asp]	45	31.1111	37.6429	No	200	116	0	0	1	Gnas	GNAS (guanine nucleotide binding protein, alpha stimulating) complex locus	5530400H20Rik, A930027G11Rik, C130027O20Rik, Galphas, Gnas1, Gnasxl, GPSA, Gsa, GSP, Nesp, Nespl, Oed-Sml, Oedsml, P1, P2, P3, PHP1A, PHP1B, POH	Somatically acquired, activating mutations (mainly R201C) of GNAS have been identified in multiple cancer forms. GNAS R201C expression has been associated with elevated expression of Wnt and ERK1/2 MAPK pathway target genes together with increased phosphorylation of ERK1/2 MAPK (PMID: 20531296 )	Expressed in 26% of 539 reads	45
	14	Veph1	3	66061153	SNV	A	G	NP_665819.2:p.Leu723Pro	NM_145820.3:c.2168T>C	NM_145820.3:c.[2168T>C]; XM_006502143.3:c.[2060T>C]; XM_006502142.3:c.[2270T>C]	NP_665819.2:p.[Leu723Pro]; XP_006502206.1:p.[Leu687Pro]; XP_006502205.1:p.[Leu757Pro]	111	29.7297	38.0909	No	200	299	1	0.0033	1	Veph1	ventricular zone expressed PH domain-containing 1	2810471M23Rik, Veph		Gene not expressed	45
	14	Col25a1	3	130549178	SNV	G	A	XP_017175295.1:p.Asp363Asn	XM_017319806.1:c.1087G>A	XM_006502278.3:c.[1087G>A]; XM_006502265.3:c.[1087G>A]; XM_006502286.3:c.[1075G>A]; XM_006502273.3:c.[1087G>A]; XM_006502275.3:c.[1042G>A]; XM_006502276.3:c.[1075G>A]; XM_006502264.3:c.[1087G>A]; XM_006502283.3:c.[1087G>A]; XM_006502270.3:c.[1087G>A]; XM_006502281.3:c.[1075G>A]; XM_006502266.3:c.[1075G>A]; NM_029838.4:c.[1087G>A]; XM_006502269.3:c.[1060G>A]; XM_006502274.3:c.[1087G>A]; XM_0065022…	XP_006502341.1:p.[Asp363Asn]; XP_006502328.1:p.[Asp363Asn]; XP_006502349.1:p.[Asp359Asn]; XP_006502336.1:p.[Asp363Asn]; XP_006502338.1:p.[Asp348Asn]; XP_006502339.1:p.[Asp359Asn]; XP_006502327.1:p.[Asp363Asn]; XP_006502346.1:p.[Asp363Asn]; XP_006502333.1:p.[Asp363Asn]; XP_006502344.1:p.[Asp359Asn]; XP_006502329.1:p.[Asp359Asn]; NP_084114.2:p.[Asp363Asn]; XP_006502332.1:p.[Asp354Asn]; XP_006502337…	119	42.8571	37.9608	No	200	247	0	0	1	Col25a1	collagen, type XXV, alpha 1	2700062B08Rik, CLAC-P		Gene not expressed	45
	14	Pcdh7	5	57721141	SNV	G	T	XP_006504082.1:p.Glu679Asp	XM_006504019.3:c.2037G>T	NM_018764.3:c.[2037G>T]; XM_006504024.3:c.[2037G>T]; NM_001310606.1:c.[2037G>T]; XM_006504023.3:c.[2037G>T]; XM_006504030.3:c.[2037G>T]; XM_006504029.3:c.[2037G>T]; XM_006504022.3:c.[2037G>T]; XM_006504028.3:c.[2037G>T]; XM_017320993.1:c.[2037G>T]; XM_006504020.3:c.[2037G>T]; NM_001310608.1:c.[2037G>T]; XM_006504025.3:c.[2037G>T]; NM_001122758.2:c.[2037G>T]; XM_006504019.3:c.[2037G>T]; XM_0173209…	NP_061234.2:p.[Glu679Asp]; XP_006504087.1:p.[Glu679Asp]; NP_001297535.1:p.[Glu679Asp]; XP_006504086.1:p.[Glu679Asp]; XP_006504093.1:p.[Glu679Asp]; XP_006504092.1:p.[Glu679Asp]; XP_006504085.1:p.[Glu679Asp]; XP_006504091.1:p.[Glu679Asp]; XP_017176482.1:p.[Glu679Asp]; XP_006504083.1:p.[Glu679Asp]; NP_001297537.1:p.[Glu679Asp]; XP_006504088.1:p.[Glu679Asp]; NP_001116230.1:p.[Glu679Asp]; XP_006504082…	114	44.7368	38.3922	No	200	311	0	0	1	Pcdh7	protocadherin 7			No coverage	45
	14	Adam20	8	40795516	SNV	G	T	NP_001009548.1:p.Ser221Ile	NM_001009548.2:c.662G>T	NM_001009548.2:c.[662G>T]; XM_006509453.1:c.[662G>T]	NP_001009548.1:p.[Ser221Ile]; XP_006509516.1:p.[Ser221Ile]	161	54.0373	37.8966	No	200	414	1	0.0024	0.001	Adam20	a disintegrin and metallopeptidase domain 20	4930529F22Rik, Adam38		No coverage	45
	14	Vegfc	8	54159406	SNV	G	A	NP_033532.1:p.Val155Ile	NM_009506.2:c.463G>A	NM_009506.2:c.463G>A	NP_033532.1:p.Val155Ile	42	47.619	38.8	No	200	108	0	0	1	Vegfc	vascular endothelial growth factor C	AW228853, VEGF-C	Vegfc is central for proliferation and migration of lymphatic endothelial cells during embryogenesis.	No coverage	45
	14	Fa2h	8	111346455	SNV	G	A	NP_835187.2:p.Pro369Leu	NM_178086.3:c.1106C>T	NM_178086.3:c.1106C>T	NP_835187.2:p.Pro369Leu	66	39.3939	38.3462	No	200	145	0	0	0.002	Fa2h	fatty acid 2-hydroxylase	FAAH, Faxdc1, G630055L08Rik		Gene not expressed	45
	14	Ap3m2	8	22803858..22803859	MNV	CA	TG	NP_001116292.1:p.Val59Ile	NM_001122820.1:c.174_175delTGinsCA	NM_001122820.1:c.[174_175delTGinsCA]; NM_029505.3:c.[174_175delTGinsCA]	NP_001116292.1:p.[Val59Ile]; NP_083781.2:p.[Val59Ile]	50	40	36.4586	No	200	115	0	0	1	Ap3m2	adaptor-related protein complex 3, mu 2 subunit	5830445E16Rik, AP-3B		Expressed in 50% of 4 reads	45
	14	Slc24a1	9	64928035	SNV	G	C	XP_017168760.1:p.Gln937Glu	XM_017313271.1:c.2809C>G	XM_017313271.1:c.[2809C>G]; NM_144813.1:c.[2809C>G]	XP_017168760.1:p.[Gln937Glu]; NP_659062.1:p.[Gln937Glu]	53	32.0755	39.0588	No	200	107	0	0	0.028	Slc24a1	solute carrier family 24 (sodium/potassium/calcium exchanger), member 1			Gene not expressed	45
	14	Gm1123	9	99023363	SNV	T	G	NP_001074245.1:p.Glu31Asp	NM_001080776.1:c.93A>C	NM_001080776.1:c.93A>C	NP_001074245.1:p.Glu31Asp	55	38.1818	37.381	No	200	110	1	0.0091	0.955	Gm1123	predicted gene 1123	AV052824, CLSP		Gene not expressed	45
	14	Strn3	12	51691466	SNV	C	G	XP_006516473.1:p.Glu80Gln	XM_006516410.3:c.238G>C	XM_006516410.3:c.[238G>C]; NM_001172098.1:c.[238G>C]; XM_006516412.3:c.[238G>C]; XM_006515437.3:c.[-72+152C>G]; XM_006515436.3:c.[-72+152C>G]; XM_006516411.3:c.[238G>C]; XM_006515433.3:c.[-206+152C>G]; XM_006515432.3:c.[-72+152C>G]; XM_017314940.1:c.[-206+152C>G]; NM_021710.3:c.[-72+152C>G]; NM_052973.2:c.[238G>C]; XM_006515435.3:c.[-72+152C>G]	XP_006516473.1:p.[Glu80Gln]; NP_001165569.1:p.[Glu80Gln]; XP_006516475.1:p.[Glu80Gln]; XP_006516474.1:p.[Glu80Gln]; NP_443205.1:p.[Glu80Gln]	20	15	39.6667	No	81.2717	35	0	0	1	Strn3	striatin, calmodulin binding protein 3	Gs2na, SG2NA, AI314282		No coverage	45
	14	Zfp808	13	62173194	SNV	C	G	XP_017171048.1:p.Gln714Glu	XM_017315559.1:c.2140C>G	NM_001039239.2:c.[2236C>G]; XM_017315559.1:c.[2140C>G]; XM_017315558.1:c.[2166-14C>G]	NP_001034328.2:p.[Gln746Glu]; XP_017171048.1:p.[Gln714Glu]	24	20.8333	37.8	No	140.973	44	0	0	0.038	Zfp808	zinc finger protein 80	EG630579, Gm7036		Not expressed among 7 reads	45
	14	Zfp36l2	17	84186622	SNV	T	C	NP_001001806.1:p.Thr196Ala	NM_001001806.2:c.586A>G	NM_001001806.2:c.586A>G	NP_001001806.1:p.Thr196Ala	23	34.7826	37	No	200	62	0	0	1	Zfp36l2	zinc finger protein 36, C3H type-like 2	Brf2, ERF2, Tis11d	ZFP36L2 are RNA-binding proteins that interact with the 3' untranslated region of mRNA, which leads to mRNA degradation and translational repression. Mice that lacked ZFP36L1 and ZFP36L2 during thymopoiesis was shown to develop T cell acute lymphoblastic leukemia (T-ALL) dependent on the oncogenic transcription factor Notch1 (PMID: 20622884). It has been suggested to be a putative driver in pedia…	Expressed in 17% of 263 reads	45
	14	Cables1	18	11840359	SNV	T	A	NP_001139759.1:p.Phe185Tyr	NM_001146287.1:c.554T>A	NM_022021.2:c.[554T>A]; NM_001146287.1:c.[554T>A]	NP_071304.2:p.[Phe185Tyr]; NP_001139759.1:p.[Phe185Tyr]	33	39.3939	38.3846	No	200	59	0	0	0.991	Cables1	CDK5 and Abl enzyme substrate 1	Cables, ik3-1	Cables1 can interact with p53 family proteins, 14-3-3, and β-catenin, suggesting that Cables1 may be a hub for cell growth regulation. Abnormal expression has been observed in multiple types of cancers and other diseases (PMID: 28119482)	Expressed in 14% of 7 reads	45
	14	Kcnk7	19	5706315	SNV	C	A	XP_006531729.1:p.Leu80Met	XM_006531666.3:c.238C>A	XM_006531666.3:c.[238C>A]; NM_010609.2:c.[568C>A]	XP_006531729.1:p.[Leu80Met]; NP_034739.2:p.[Leu190Met]	41	39.0244	38.6875	No	200	109	0	0	0.985	Kcnk7	potassium channel, subfamily K, member 7	2310014G03Rik, Kcnk6, Kcnk8, Knot, Mlk3		Gene not expressed	45
	14	Uba1	X	20681389	SNV	G	T	NP_001263245.1:p.Val905Leu	NM_001276316.1:c.2713G>T	NM_001276316.1:c.[2713G>T]; NM_001136085.2:c.[2713G>T]; NM_009457.4:c.[2893G>T]; NM_001276317.1:c.[2713G>T]	NP_001263245.1:p.[Val905Leu]; NP_001129557.1:p.[Val905Leu]; NP_033483.2:p.[Val965Leu]; NP_001263246.1:p.[Val905Leu]	74	32.4324	38.6667	No	200	153	1	0.0065	1	Uba1	ubiquitin-like modifier activating enzyme 1	A1S9, Sbx, Ube-1, Ube1x		Not expressed among ca 500 reads	45
	15	Sulf1	1	12839899	SNV	G	A	XP_006495574.1:p.Asp640Asn	XM_006495511.3:c.1918G>A	NM_001198566.1:c.[1918G>A]; XM_006495510.3:c.[1918G>A]; XM_006495511.3:c.[1918G>A]; XM_006495512.3:c.[1918G>A]; XM_006495513.3:c.[1918G>A]; NM_172294.1:c.[1918G>A]; NM_001198565.1:c.[1918G>A]; XM_006495514.1:c.[1918G>A]	NP_001185495.1:p.[Asp640Asn]; XP_006495573.1:p.[Asp640Asn]; XP_006495574.1:p.[Asp640Asn]; XP_006495575.1:p.[Asp640Asn]; XP_006495576.1:p.[Asp640Asn]; NP_758498.1:p.[Asp640Asn]; NP_001185494.1:p.[Asp640Asn]; XP_006495577.1:p.[Asp640Asn]	63	34.9206	38.0909	No	200	181	0	0	1	Sulf1	sulfatase 1	AI467640, AW121680, mKIAA1077	SULF1 inhibits the co-receptor function of cellular heparan sulfate proteoglycans in multiple receptor tyrosine kinase signaling pathways, particularly by the heparin binding growth factors, fibroblast growth factor 2, vascular endothelial growth factor, hepatocyte growth factor, PDGF, and heparin-binding epidermal growth factor (HB-EGF). (PMID: 19373441 ). However, SULF1 overexpression is also a…	No coverage	42
	15	Bmpr2	1	59847167	SNV	G	A	NP_031587.1:p.Arg321Gln	NM_007561.4:c.962G>A	NM_007561.4:c.[962G>A]; XM_006495633.1:c.[962G>A]	NP_031587.1:p.[Arg321Gln]; XP_006495696.1:p.[Arg321Gln]	74	48.6486	38.2222	No	200	204	1	0.0049	1	Bmpr2	bone morphogenetic protein receptor, type II (serine/threonine kinase)	2610024H22Rik, AL117858, AW546137, BB189135, BMP-2, BMPR-2, BMPR-II, BMPRII, BRK-3, Gm20272	Bone morphogenetic proteins (BMPs) have multiple roles in skeletal development, homeostasis and regeneration. BMPs signal via type I and type II serine/threonine kinase receptors (BMPRI and BMPRII).Perturbations in BMP signaling via BMPRI resulted in various diseases in bone, cartilage, and muscles (PMID: 27088043 ). BMPR2 expression has also been linked to DNA damage control as excessive DNA dam…	Gene not expressed	42
	15	Atic	1	71564414	SNV	A	G	NP_080471.2:p.Thr130Ala	NM_026195.3:c.388A>G	NM_026195.3:c.388A>G	NP_080471.2:p.Thr130Ala	41	43.9024	37.7778	No	200	126	0	0	0.998	Atic	5-aminoimidazole-4-carboxamide ribonucleotide formyltransferase/IMP cyclohydrolase	2610509C24Rik, AA536954, AW212393	ATIC has been seen in fusion with Anaplastic lymphoma kinase (ALK) (PMID: 28659337, 27846861, 26053561 )	Expressed in 51% of 70 reads	42
	15	Ugt1a10	1	88212021	SNV	G	A		NM_145079.3:c.859-3023G>A	NM_145079.3:c.[859-3023G>A]; NM_201410.3:c.[859-3023G>A]; NM_201643.2:c.[853-3023G>A]; NM_013701.3:c.[865-3023G>A]; NM_201641.2:c.[856-3023G>A]; NM_201645.2:c.[20G>A]; NM_201644.2:c.[850-3023G>A]; NM_201642.4:c.[859-3023G>A]	NP_964007.2:p.Ser7Asn	208	16.8269	37.3714	No	200	331	0	0	0	Ugt1a10	UDP glycosyltransferase 1 family	A13, Ugt1a13, mUGTBr/P, UDPGT, UDPGT 1-9, UGT1-09, UGT1.9, Ugt1a12, UGTP4, A10', Ugt1a10, A9', Ugt1a9, UDPGT 1-6, UGT1-06, UGT1.6, Ugt1a6, Ugt1a7, UDPGT 1-2, Ugt1, Gnt1, UDPGT 1-1, Udpgt-1a, UGT1A01, UgtBr1		No coverage	42
	15	Hjurp	1	88269331	SNV	T	C	NP_941054.2:p.Glu146Gly	NM_198652.2:c.437A>G	XM_006529722.3:c.[119A>G]; XM_006529721.3:c.[220-1305A>G]; NM_198652.2:c.[437A>G]; XM_006529720.3:c.[437A>G]	XP_006529785.1:p.[Glu40Gly]; NP_941054.2:p.[Glu146Gly]; XP_006529783.1:p.[Glu146Gly]	426	23.7089	38.1584	No	200	715	0	0	0	Hjurp	Holliday junction recognition protein	6430706D22Rik, A730008H23Rik, C330011F01Rik, Gm975, Mfleg1	Centromere definition involves CENP-A and its deposition by HJURP. Alterations in this process impair chromosome segregation and genome stability, which are also compromised by p53 inactivation in cancer. CENP-A and HJURP are transcriptionally up-regulated in p53-null human tumors. (PMID: 28356341)	Expressed in 36% of 25 reads	42
	15	Rapgef1	2	29707207	SNV	A	G	XP_006497646.1:p.Tyr564Cys	XM_006497583.1:c.1691A>G	XM_006497583.1:c.[1691A>G]; XM_006497590.3:c.[1694A>G]; XM_006497592.3:c.[1694A>G]; XM_006497585.3:c.[1694A>G]; XM_006497587.3:c.[1694A>G]; XM_006497588.1:c.[1577A>G]; XM_006497589.3:c.[1694A>G]; XM_006497582.3:c.[1694A>G]; NM_001039087.1:c.[1691A>G]; NM_054050.2:c.[1691A>G]; XM_006497586.3:c.[1580A>G]; XM_006497584.3:c.[1694A>G]; NM_001039086.1:c.[1577A>G]	XP_006497646.1:p.[Tyr564Cys]; XP_006497653.1:p.[Tyr565Cys]; XP_006497655.1:p.[Tyr565Cys]; XP_006497648.1:p.[Tyr565Cys]; XP_006497650.1:p.[Tyr565Cys]; XP_006497651.1:p.[Tyr526Cys]; XP_006497652.1:p.[Tyr565Cys]; XP_006497645.1:p.[Tyr565Cys]; NP_001034176.1:p.[Tyr564Cys]; NP_473391.1:p.[Tyr564Cys]; XP_006497649.1:p.[Tyr527Cys]; XP_006497647.1:p.[Tyr565Cys]; NP_001034175.1:p.[Tyr526Cys]	14	35.7143	38	No	103.532	59	0	0	1	Rapgef1	Rap guanine nucleotide exchange factor (GEF) 1	4932418O06Rik, C3G, Grf2		Expressed in 63% of 22 reads	42
	15	Olfr1132	2	87635003	SNV	A	T	NP_667047.1:p.Val248Asp	NM_146836.1:c.743T>A	NM_146836.1:c.743T>A	NP_667047.1:p.Val248Asp	81	51.8519	37.8333	No	200	236	0	0	0.226	Olfr1132	olfactory receptor 1132	MOR177-1		Gene not expressed	42
	15	Rbm46	3	82866612	SNV	T	G	NP_001264099.1:p.Thr9Pro	NM_001277170.1:c.25A>C	XM_011240188.1:c.[25A>C]; XM_006501851.1:c.[25A>C]; XM_006501849.3:c.[25A>C]; NM_001277170.1:c.[25A>C]; XM_017319680.1:c.[25A>C]; XM_006501850.3:c.[25A>C]	XP_011238490.1:p.[Thr9Pro]; XP_006501914.1:p.[Thr9Pro]; XP_006501912.1:p.[Thr9Pro]; NP_001264099.1:p.[Thr9Pro]; XP_017175169.1:p.[Thr9Pro]; XP_006501913.1:p.[Thr9Pro]	59	38.9831	39	No	200	152	0	0	1	Rbm46	RNA binding motif protein 46	EG633285, ENSMUSG00000033882, Gm761		Gene not expressed	42
	15	Npr1	3	90461097	SNV	T	C	NP_032753.5:p.Ile489Val	NM_008727.5:c.1465A>G	NM_008727.5:c.[1465A>G]; XM_006501114.1:c.[1465A>G]	NP_032753.5:p.[Ile489Val]; XP_006501177.1:p.[Ile489Val]	49	22.449	39	No	200	124	0	0	0.998	Npr1	natriuretic peptide receptor 1	AI893888, GC-A, NPR-A, NPRA, Pndr		Not expressed among 4 reads	42
	15	Gm13084	4	143809333	SNV	G	A	XP_006539053.1:p.His344Tyr	XM_006538990.3:c.1030C>T	XM_006538990.3:c.1030C>T	XP_006539053.1:p.His344Tyr	42	16.6667	37.7143	No	200	45	0	0	0.219	Gm13084	predicted gene 13084	OTTMUSG00000010328		Gene not expressed	42
	15	Ablim2	5	35812209	SNV	G	A	XP_006503969.1:p.Arg222Gln	XM_006503906.1:c.665G>A	NM_177678.7:c.[665G>A]; NM_001177699.1:c.[665G>A]; XM_006503924.1:c.[665G>A]; XM_006503922.1:c.[665G>A]; XM_006503908.1:c.[665G>A]; XM_006503919.1:c.[665G>A]; XM_006503912.1:c.[665G>A]; NM_001177698.1:c.[665G>A]; NM_001177697.1:c.[665G>A]; XM_017320833.1:c.[665G>A]; XM_006503907.1:c.[665G>A]; XM_006503913.1:c.[665G>A]; XM_006503911.1:c.[665G>A]; XM_006503909.1:c.[665G>A]; XM_017320834.1:c.[665G>A…	NP_808346.3:p.[Arg222Gln]; NP_001171170.1:p.[Arg222Gln]; XP_006503987.1:p.[Arg222Gln]; XP_006503985.1:p.[Arg222Gln]; XP_006503971.1:p.[Arg222Gln]; XP_006503982.1:p.[Arg222Gln]; XP_006503975.1:p.[Arg222Gln]; NP_001171169.1:p.[Arg222Gln]; NP_001171168.1:p.[Arg222Gln]; XP_017176322.1:p.[Arg222Gln]; XP_006503970.1:p.[Arg222Gln]; XP_006503976.1:p.[Arg222Gln]; XP_006503974.1:p.[Arg222Gln]; XP_006503972…	37	48.6486	38.1667	No	200	81	0	0	1	Ablim2	actin-binding LIM protein 2	AI606905, C230091L11		Gene not expressed	42
	15	Igk, Igkv13-64	6	69362981	SNV	G	C	Igkv13-64:p.Arg47Thr	Igkv13-64:c.140G>C	Igkv13-64:c.140G>C	Igkv13-64:p.Arg47Thr	10	60	39.6667	No	200	35	0	0	0.254	Igk, Igkv13-64	immunoglobulin kappa chain complex, immunoglobulin kappa chain variable 13-64	kappa, gu33		Gene not expressed	42
	15	Slc6a11	6	114238419	SNV	C	T	NP_766478.1:p.Arg427Trp	NM_172890.3:c.1279C>T	NM_172890.3:c.1279C>T	NP_766478.1:p.Arg427Trp	57	57.8947	38.3333	No	200	123	1	0.0081	0.997	Slc6a11	solute carrier family 6 (neurotransmitter transporter, GABA), member 11	D930045G19Rik, E130202I16Rik, Gabt4, Gat3, GAT4		Gene not expressed	42
	15	Vmn2r68	7	85234519	SNV	T	G	NP_001098651.1:p.Tyr126Ser	NM_001105181.1:c.377A>C	NM_001105181.1:c.377A>C	NP_001098651.1:p.Tyr126Ser	102	19.6078	38.15	No	200	296	0	0	0.303	Vmn2r68	vomeronasal 2, receptor 68	EG620697, Vmn2r68-ps		Gene not expressed	42
	15	Ddias	7	92858589	SNV	G	A	XP_006508309.1:p.Pro706Leu	XM_006508246.2:c.2117C>T	NM_001080995.1:c.[2117C>T]; XM_006508246.2:c.[2117C>T]; XM_006508245.2:c.[2117C>T]	NP_001074464.1:p.[Pro706Leu]; XP_006508309.1:p.[Pro706Leu]; XP_006508308.1:p.[Pro706Leu]	90	44.4444	38.725	No	200	194	0	0	0.856	Ddias	DNA damage-induced apoptosis suppressor	4632434I11Rik, noxin	DDIAS has an anti-apoptotic function during DNA damage in lung cancer. It has dual functions in inhibiting DISC formation as well as in destabilizing caspase-8, thereby suppressing TRAIL-mediated apoptosis of cancer cells (PMID: 29242605 )	Expressed in 27% of 11 reads	42
	15	Olfr577	7	102973309	SNV	C	T	NP_667320.1:p.Val228Ile	NM_147109.1:c.682G>A	NM_147109.1:c.682G>A	NP_667320.1:p.Val228Ile	116	58.6207	37.4265	No	200	221	1	0.0045	0.271	Olfr577	olfactory receptor 577	MOR7-2		Gene not expressed	42
	15	Olfr295	7	86585379..86585380	MNV	GG	TA	XP_006507937.1:p.Gly35Tyr	XM_006507874.1:c.103_104delGGinsTA	NM_146851.2:c.[103_104delGGinsTA]; XM_006507874.1:c.[103_104delGGinsTA]	NP_667062.2:p.[Gly35Tyr]; XP_006507937.1:p.[Gly35Tyr]	169	49.1124	38.8528	No	200	384	1	0.0026	0	Olfr295	olfactory receptor 295	MOR220-1		Gene not expressed	42
	15	Grik4	9	42687980	SNV	T	C		XM_017313104.1:c.-994A>G	XM_017313102.1:c.[187A>G]; XM_011242383.2:c.[200A>G]; NM_175481.5:c.[200A>G]; XM_006509941.3:c.[200A>G]; XM_017313104.1:c.[-994A>G]; XM_006509942.3:c.[98A>G]	XP_017168591.1:p.[Thr63Ala]; XP_011240685.1:p.[Asp67Gly]; NP_780690.2:p.[Asp67Gly]; XP_006510004.1:p.[Asp67Gly]; XP_006510005.1:p.[Asp33Gly]	55	49.0909	38.963	No	200	123	0	0	1	Grik4	glutamate receptor, ionotropic, kainate 4	6330551K01Rik, GluK4, GluRgamma1, KA-1, KA1		Gene not expressed	42
	15	Ap3d1	10	80717760	SNV	T	A	NP_031486.1:p.Gln551Leu	NM_007460.1:c.1652A>T	NM_007460.1:c.1652A>T	NP_031486.1:p.Gln551Leu	58	34.4828	38.8	No	200	97	0	0	1	Ap3d1	adaptor-related protein complex 3, delta 1 subunit	AA407035, Ap3d, Bolvr, mBLVR1, mh, mocha		Expressed in 2% of 98 reads	42
	15	Naca	10	128043014	SNV	A	C	NP_001106670.1:p.Gln1305Pro	NM_001113199.1:c.3914A>C	NM_001282976.1:c.[71-3154A>C]; NM_013608.3:c.[71-3154A>C]; NM_001113199.1:c.[3914A>C]	NP_001106670.1:p.Gln1305Pro	21	38.0952	37	No	200	58	0	0	0.008	Naca	nascent polypeptide-associated complex alpha polypeptide	AL022831, AL024382, Gm1878, mKIAA0363, skNAC		No coverage	42
	15	Igf2bp1	11	96005560	SNV	T	A	NP_034081.1:p.His25Leu	NM_009951.4:c.74A>T	NM_009951.4:c.74A>T	NP_034081.1:p.His25Leu	83	46.988	37.8462	No	200	105	0	0	0.991	Igf2bp1	insulin-like growth factor 2 mRNA binding protein 1	AL024068, AW549074, CRD-BP, Crdbp, D030026A21Rik, D11Moh40e, D11Moh45, IMP-1, mir-3063, Neilsen, ZBP-1, Zbp1	Deletion of IGF2BP1 impairs the growth and metastasis of ovarian cancer-derived cells in nude mice while enhanced expression promotes an aggressive tumor cell phenotype by antagonizing miRNA-impaired gene expression. (PMID: 29660014)	Gene not expressed	42
	15	Krtap31-1	11	99908270	SNV	G	A	NP_081844.1:p.Val100Met	NM_027568.2:c.298G>A	NM_027568.2:c.298G>A	NP_081844.1:p.Val100Met	63	31.746	39.15	No	200	207	0	0	0.024	Krtap31-1	keratin associated protein 31-1	4733401H21Rik, AI506529		Gene not expressed	42
	15	Hs1bp3	12	8324049..8324051	Del	GAG	-	NP_067404.2:p.Glu204del	NM_021429.3:c.586_588delGAG	XM_006515161.3:c.[256_258delGAG]; NM_021429.3:c.[586_588delGAG]	XP_006515224.1:p.[Glu94del]; NP_067404.2:p.[Glu204del]	12	16.6667	39	No	200	42	0	0	0.007	Hs1bp3	HCLS1 binding protein 3			No coverage	42
	15	Lrrc16a	13	24041712	SNV	T	G	XP_011242639.1:p.Asp954Ala	XM_011244337.2:c.2861A>C	XM_017315586.1:c.[3092A>C]; XM_011244334.2:c.[3110A>C]; XM_017315587.1:c.[3080A>C]; XM_006516742.2:c.[3080A>C]; XM_011244336.2:c.[3110A>C]; XM_011244338.2:c.[3110A>C]; XM_011244337.2:c.[2861A>C]; XM_011244333.2:c.[3110A>C]; XM_017315584.1:c.[3092A>C]; NM_001311122.1:c.[3080A>C]; XM_011244335.2:c.[3098A>C]; XM_006516741.2:c.[3080A>C]; XM_017315583.1:c.[3098A>C]; XM_011244340.2:c.[3110A>C]; NM_0268…	XP_017171075.1:p.[Asp1031Ala]; XP_011242636.1:p.[Asp1037Ala]; XP_017171076.1:p.[Asp1027Ala]; XP_006516805.1:p.[Asp1027Ala]; XP_011242638.1:p.[Asp1037Ala]; XP_011242640.1:p.[Asp1037Ala]; XP_011242639.1:p.[Asp954Ala]; XP_011242635.1:p.[Asp1037Ala]; XP_017171073.1:p.[Asp1031Ala]; NP_001298051.1:p.[Asp1027Ala]; XP_011242637.1:p.[Asp1033Ala]; XP_006516804.1:p.[Asp1027Ala]; XP_017171072.1:p.[Asp1033Ala…	132	37.8788	38.3	No	200	306	0	0	1	Lrrc16a	leucine rich repeat containing 16A	1110037D04Rik, AI425970, CARMIL, CARML1, D130057M20, Lrrc16		Gene not expressed	42
	15	Spata31	13	64921972	SNV	C	T	NP_084323.2:p.Arg645*	NM_030047.2:c.1933C>T	NM_030047.2:c.1933C>T	NP_084323.2:p.Arg645*	73	100	37.9178	No	200	191	0	0	0	Spata31	spermatogenesis associated 31	4930458L03Rik, Aep1, Fam75a, Spata31a, Vad1.3		Gene not expressed	42
	15	Naip2	13	100161909	SNV	A	T	NP_035002.2:p.Tyr540Asn	NM_010872.3:c.1618T>A	NM_001126182.2:c.[1618T>A]; NM_010872.3:c.[1618T>A]	NP_001119654.1:p.[Tyr540Asn]; NP_035002.2:p.[Tyr540Asn]	206	96.6019	37.7136	No	200	580	0	0	0.991	Naip2	NLR family, apoptosis inhibitory protein 2	Birc1b, Naip-rs6		No coverage	42
	15	Nkx2-6	14	69174860	SNV	C	T	NP_035050.2:p.Ala159Val	NM_010920.2:c.476C>T	XM_006518679.1:c.[185C>T]; NM_010920.2:c.[476C>T]	XP_006518742.1:p.[Ala62Val]; NP_035050.2:p.[Ala159Val]	23	91.3043	37.3333	No	200	47	0	0	0.003	Nkx2-6	NK2 homeobox 6	AV044928, Nkx-2.6, Nkx2.6, tinman, Tix		Gene not expressed	42
	15	Pdzd2	15	12407357	SNV	G	A	NP_001074533.1:p.Ser565Phe	NM_001081064.1:c.1694C>T	NM_001081064.1:c.[1694C>T]; XM_006520166.3:c.[1418C>T]; XM_017316735.1:c.[701C>T]; XM_017316734.1:c.[1172C>T]; XM_006520164.2:c.[1694C>T]; XM_006520167.3:c.[1262C>T]; XM_006520159.3:c.[1694C>T]; XM_006520165.3:c.[1538C>T]; XM_006520172.3:c.[1694C>T]; XM_006520169.3:c.[1172C>T]; XM_006520160.3:c.[1694C>T]; XM_006520162.2:c.[1694C>T]; XM_006520161.3:c.[1694C>T]; XM_006520168.3:c.[1172C>T]; XM_00652…	NP_001074533.1:p.[Ser565Phe]; XP_006520229.1:p.[Ser473Phe]; XP_017172224.1:p.[Ser234Phe]; XP_017172223.1:p.[Ser391Phe]; XP_006520227.1:p.[Ser565Phe]; XP_006520230.1:p.[Ser421Phe]; XP_006520222.1:p.[Ser565Phe]; XP_006520228.1:p.[Ser513Phe]; XP_006520235.1:p.[Ser565Phe]; XP_006520232.1:p.[Ser391Phe]; XP_006520223.1:p.[Ser565Phe]; XP_006520225.1:p.[Ser565Phe]; XP_006520224.1:p.[Ser565Phe]; XP_006520…	172	25	38.6279	No	200	175	0	0	1	Pdzd2	PDZ domain containing 2	4930537L06Rik, A930022H17Rik, Gm21706, Gm82, mKIAA0300, Pdzk3		Expressed in 50% of 2 reads	42
	15	Zfp318	17	46412514^46412515	Ins	-	GAAGAAGAAGAAGAAGAAGAAGAAGAA	NP_997554.2:p.Glu1823_Gly1824insGluGluGluGluGluGluGluGluGlu	NM_207671.4:c.5442_5443insGAAGAAGAAGAAGAAGAAGAAGAAGAA	NM_207671.4:c.[5442_5443insGAAGAAGAAGAAGAAGAAGAAGAAGAA]; NM_021346.2:c.[3342+3295_3342+3296insGAAGAAGAAGAAGAAGAAGAAGAAGAA]; XM_011246554.2:c.[4806_4807insGAAGAAGAAGAAGAAGAAGAAGAAGAA]	NP_997554.2:p.[Glu1823_Gly1824insGluGluGluGluGluGluGluGluGlu]; XP_011244856.1:p.[Glu1611_Gly1612insGluGluGluGluGluGluGluGluGlu]	31	93.5484	37.6493	No	200	74	0	0		Zfp318	zinc finger protein 318	2610034E08Rik, D530032D06Rik, TZF, Znf318			42
	15	Olfr1490	19	13655337	SNV	A	G	NP_001011832.1:p.Lys298Glu	NM_001011832.1:c.892A>G	NM_001011832.1:c.892A>G	NP_001011832.1:p.Lys298Glu	72	58.3333	38.4048	No	200	146	0	0	0.004	Olfr1490	olfactory receptor 1490	MOR266-6P		Gene not expressed	42
	15	Rbm10	X	20650590	SNV	G	T	NP_001161247.1:p.Gly899Val	NM_001167775.1:c.2696G>T	XM_006527618.3:c.[2696G>T]; NM_001167775.1:c.[2696G>T]; NM_001167776.1:c.[2468G>T]; NM_145627.2:c.[2699G>T]; XM_006527621.3:c.[2090G>T]; XM_006527620.3:c.[2216G>T]; XM_006527619.3:c.[2465G>T]	XP_006527681.1:p.[Gly899Val]; NP_001161247.1:p.[Gly899Val]; NP_001161248.1:p.[Gly823Val]; NP_663602.1:p.[Gly900Val]; XP_006527684.1:p.[Gly697Val]; XP_006527683.1:p.[Gly739Val]; XP_006527682.1:p.[Gly822Val]	98	32.6531	38.0312	No	200	234	0	0	1	Rbm10	RNA binding motif protein 10	E430039K10Rik	Mutated in a subset of lung cancers (PMID: 27545006 ) and contributes to pathogenesis by deregulating splicing (PMID: 28091594 ).	Not expressed among ca 70 reads	42
	15	Gpr101	X	57500620	SNV	G	T	NP_001028532.1:p.Pro390Gln	NM_001033360.3:c.1169C>A	NM_001033360.3:c.1169C>A	NP_001028532.1:p.Pro390Gln	77	24.6753	38.9474	No	200	182	0	0	1	Gpr101	G protein-coupled receptor 101	Gm365, GPCR6		Gene not expressed	42
	15	Gprasp1	X	135800063	SNV	G	A	NP_080357.4:p.Arg335Gln	NM_026081.5:c.1004G>A	NM_001005385.1:c.[1004G>A]; NM_026081.5:c.[1004G>A]; NM_001004359.2:c.[1004G>A]	NP_001005385.1:p.[Arg335Gln]; NP_080357.4:p.[Arg335Gln]; NP_001004359.1:p.[Arg335Gln]	71	47.8873	36.8824	No	200	153	0	0	0.001	Gprasp1	G protein-coupled receptor associated sorting protein 1	2210415K24Rik, 3110031O14Rik, C87852, GASP, GASP1		No coverage	42
	15	Amer1	X	95427284..95427286	Del	TTC	-	NP_780388.2:p.Glu409del	NM_175179.4:c.1225_1227delGAA	NM_175179.4:c.1225_1227delGAA	NP_780388.2:p.Glu409del	15	20	36.3333	No	200	26	0	0	0.277667	Amer1	APC membrane recruitment 1	2810002O09Rik, AW492303, Fam123b, Wtx	Mutations in AMER1 has been seen in Wilms tumor (PMID: 28825729 and colorectal cancer (PMID: 26071483). AMER1 co-localizes with p53 within cytoplasmic body of adenovirus-transformed kidney cells. AMER1 binds to p53 and increases p300-mediated acetylation of p53 (PMID: 22285752 )	No coverage	42
	16	Cdh19	1	110954595	SNV	T	A	XP_006529583.1:p.Met56Leu	XM_006529520.2:c.166A>T	XM_011247991.1:c.[1A>T]; XM_006529521.2:c.[166A>T]; XM_017320389.1:c.[166A>T]; NM_001081386.1:c.[166A>T]; XM_006529520.2:c.[166A>T]	XP_011246293.1:p.[Met1?]; XP_006529584.1:p.[Met56Leu]; XP_017175878.1:p.[Met56Leu]; NP_001074855.1:p.[Met56Leu]; XP_006529583.1:p.[Met56Leu]	47	48.9362	38.4348	No	200	115	0	0	0.997	Cdh19	cadherin 19, type 2			Gene not expressed	45
	16	Trove2	1	143770824	SNV	A	C	NP_038863.1:p.Leu61*	NM_013835.2:c.182T>G	NM_013835.2:c.[182T>G]; XM_017319451.1:c.[182T>G]	NP_038863.1:p.[Leu61*]; XP_017174940.1:p.[Leu61*]	79	50.6329	37.575	No	200	155	0	0	1	Trove2	TROVE domain family, member 2	1810007I17Rik, A530054J02Rik, AI646302, SS-A/Ro, Ssa, Ssa2		Expressed in 100% of 1 read	45
	16	Tnn	1	160098260	SNV	C	T	NP_808507.2:p.Arg1389Gln	NM_177839.3:c.4166G>A	NM_177839.3:c.[4166G>A]; XM_006496904.1:c.[3902G>A]; XM_006496906.1:c.[3902G>A]; XM_006496905.1:c.[3902G>A]	NP_808507.2:p.[Arg1389Gln]; XP_006496967.1:p.[Arg1301Gln]; XP_006496969.1:p.[Arg1301Gln]; XP_006496968.1:p.[Arg1301Gln]	48	43.75	38.1905	No	200	117	0	0	1	Tnn	tenascin N	tenascin-W, Tnw		Gene not expressed	45
	16	Hao1	2	134501081	SNV	C	A	NP_034533.1:p.Gly297Cys	NM_010403.2:c.889G>T	NM_010403.2:c.889G>T	NP_034533.1:p.Gly297Cys	57	89.4737	38.4706	No	200	138	0	0	1	Hao1	hydroxyacid oxidase 1, liver	GOX, Gox1, Hao-1		Gene not expressed	45
	16	Rptn	3	93397187	SNV	A	G	NP_033126.2:p.Gln609Arg	NM_009100.2:c.1826A>G	NM_009100.2:c.1826A>G	NP_033126.2:p.Gln609Arg	159	44.0252	37.4571	No	200	366	0	0	0.025	Rptn	repetin			Gene not expressed	45
	16	Gba2	4	43571380	SNV	G	A	NP_766280.2:p.Arg190Trp	NM_172692.3:c.568C>T	NM_172692.3:c.[568C>T]; XM_006537832.3:c.[6C>T]	NP_766280.2:p.[Arg190Trp]	40	57.5	38.2609	No	200	112	0	0	1	Gba2	glucosidase beta 2	F630034E04		No coverage	45
	16	Steap1	5	5739941	SNV	T	G	NP_081675.2:p.Asp206Ala	NM_027399.3:c.617A>C	NM_027399.3:c.617A>C	NP_081675.2:p.Asp206Ala	65	47.6923	38.3226	No	200	122	0	0	1	Steap1	six transmembrane epithelial antigen of the prostate 1	2410007B19Rik, Prss24, Steap		Not expressed among 4 reads	45
	16	Htt	5	34834338	SNV	T	C	NP_034544.1:p.Ser1216Pro	NM_010414.3:c.3646T>C	XM_006503744.2:c.[3232T>C]; XM_017320683.1:c.[-270T>C]; NM_010414.3:c.[3646T>C]	XP_006503807.1:p.[Ser1078Pro]; NP_034544.1:p.[Ser1216Pro]	115	48.6957	37.1964	No	200	233	0	0	1	Htt	huntingtin	AI256365, C430023I11Rik, Hd, Hdh, IT15		No coverage	45
	16	Tax1bp1	6	52751110	SNV	A	G	XP_006506432.1:p.Tyr557Cys	XM_006506369.3:c.1670A>G	NM_025816.3:c.[1670A>G]; XM_006506369.3:c.[1670A>G]; XM_006506371.3:c.[1484A>G]; XM_006506370.3:c.[1523A>G]	NP_080092.2:p.[Tyr557Cys]; XP_006506432.1:p.[Tyr557Cys]; XP_006506434.1:p.[Tyr495Cys]; XP_006506433.1:p.[Tyr508Cys]	57	40.3509	38.5652	No	200	123	0	0	1	Tax1bp1	Tax1 (human T cell leukemia virus type I) binding protein 1	1200003J11Rik, 1700069J21Rik, AA930106, D6Ertd404e, D6Ertd772e, T6bp, TXBP151		Expressed in 53% or 19 reads	45
	16	Oca2	7	56254907	SNV	A	C	XP_006540762.1:p.Lys40Asn	XM_006540699.1:c.120A>C	NM_021879.2:c.[120A>C]; XM_006540699.1:c.[120A>C]; XM_006540700.1:c.[120A>C]	NP_068679.1:p.[Lys40Asn]; XP_006540762.1:p.[Lys40Asn]; XP_006540763.1:p.[Lys40Asn]	65	43.0769	37.6071	No	200	157	0	0	0	Oca2	oculocutaneous albinism II	D7H15S12, D7Icr28RN, D7Nic1, p		Gene not expressed	45
	16	Nlrp4b	7	10715487^10715488	Ins	-	A	XP_006539767.1:p.Ile542fs	XM_006539704.1:c.1616_1617insA	XM_006539704.1:c.[1616_1617insA]; NM_172481.2:c.[1616_1617insA]	XP_006539767.1:p.[Ile542fs]; NP_766069.1:p.[Ile542fs]	73	35.6164	38.9231	Yes	200	220	0	0		Nlrp4b	NLR family, pyrin domain containing 4B	AU022726, E330024M09, Nalp-gamma, Nalp4b		Gene not expressed	45
	16	Ank1	8	23116194	SNV	A	G	XP_006509052.1:p.Arg1219Gly	XM_006508989.3:c.3655A>G	XM_006508992.3:c.[3655A>G]; XM_006509001.3:c.[3655A>G]; XM_006508998.3:c.[3655A>G]; NM_001277289.2:c.[3514A>G]; XM_006508996.2:c.[3514A>G]; XM_006508994.3:c.[3655A>G]; NM_001277284.2:c.[3466A>G]; NM_001277286.2:c.[3514A>G]; XM_006508991.3:c.[3655A>G]; XM_006508990.2:c.[3601A>G]; XM_006508993.3:c.[3655A>G]; NM_001110783.3:c.[3601A>G]; XM_006508999.3:c.[3631A>G]; XM_006509000.2:c.[3601A>G]; NM_0012…	XP_006509055.1:p.[Arg1219Gly]; XP_006509064.1:p.[Arg1219Gly]; XP_006509061.1:p.[Arg1219Gly]; NP_001264218.1:p.[Arg1172Gly]; XP_006509059.1:p.[Arg1172Gly]; XP_006509057.1:p.[Arg1219Gly]; NP_001264213.1:p.[Arg1156Gly]; NP_001264215.1:p.[Arg1172Gly]; XP_006509054.1:p.[Arg1219Gly]; XP_006509053.1:p.[Arg1201Gly]; XP_006509056.1:p.[Arg1219Gly]; NP_001104253.1:p.[Arg1201Gly]; XP_006509062.1:p.[Arg1211Gl…	69	28.9855	37.85	No	200	124	0	0	0.083	Ank1	ankyrin 1, erythroid	Ank-1, nb, pale		Gene not expressed	45
	16	Klkb1	8	45275552	SNV	C	T	NP_032481.2:p.Arg390His	NM_008455.3:c.1169G>A	NM_008455.3:c.1169G>A	NP_032481.2:p.Arg390His	117	23.0769	38.4074	No	200	232	0	0	0.996	Klkb1	kallikrein B, plasma 1	APS, Kal-3, Kal3, Klk3, PSA		Gene not expressed	45
	16	Upf1	8	70339387	SNV	G	C	XP_006509667.1:p.Ala407Gly	XM_006509604.3:c.1220C>G	NM_001122829.1:c.[1220C>G]; XM_006509604.3:c.[1220C>G]; XM_006509605.3:c.[1220C>G]; NM_030680.2:c.[1187C>G]	NP_001116301.1:p.[Ala407Gly]; XP_006509667.1:p.[Ala407Gly]; XP_006509668.1:p.[Ala407Gly]; NP_109605.2:p.[Ala396Gly]	43	58.1395	35.32	No	200	109	0	0	1	Upf1	UPF1 regulator of nonsense transcripts homolog (yeast)	B430202H16Rik, NORF1, PNORF-1, Rent1, Upflp		Expressed in 33% of 3 reads	45
	16	Rpl13	8	123102683	SNV	A	G	NP_058018.2:p.Ile9Val	NM_016738.5:c.25A>G	NM_016738.5:c.25A>G	NP_058018.2:p.Ile9Val	87	17.2414	38.6	No	200	126	0	0	1	Rpl13	ribosomal protein L13	A52, L13		Expressed in 2% of 317 reads	45
	16	Olfr143	9	38253438	Del	A	-	NP_667017.2:p.Asn8fs	NM_146806.2:c.20delA	NM_146806.2:c.20delA	NP_667017.2:p.Asn8fs	106	40.566	35.0698	Yes	200	267	0	0	0.004	Olfr143	olfactory receptor 143	K18, MOR170-6		Gene not expressed	45
	16	Col12a1	9	79633726	SNV	T	C	NP_001277237.1:p.Glu2373Gly	NM_001290308.1:c.7118A>G	XM_006510797.3:c.[7118A>G]; XM_006510800.3:c.[3626A>G]; NM_001290308.1:c.[7118A>G]	XP_006510860.1:p.[Glu2373Gly]; XP_006510863.1:p.[Glu1209Gly]; NP_001277237.1:p.[Glu2373Gly]	64	46.875	38.7	No	200	204	0	0	1	Col12a1	collagen, type XII, alpha 1			Gene not expressed	45
	16	Pth1r	9	110722499	Del	G	-	XP_006512048.1:p.Arg653fs	XM_006511985.2:c.1957delC	NM_001083936.1:c.[1531delC]; NM_011199.2:c.[1531delC]; NM_001083935.1:c.[1531delC]; XM_017313215.1:c.[1513delC]; XM_006511985.2:c.[1957delC]; XM_006511987.2:c.[1579delC]; XM_006511988.3:c.[1513delC]; XM_017313214.1:c.[1705delC]	NP_001077405.1:p.[Arg511fs]; NP_035329.2:p.[Arg511fs]; NP_001077404.1:p.[Arg511fs]; XP_017168704.1:p.[Arg505fs]; XP_006512048.1:p.[Arg653fs]; XP_006512050.1:p.[Arg527fs]; XP_006512051.1:p.[Arg505fs]; XP_017168703.1:p.[Arg569fs]	60	48.3333	35.6897	Yes	200	120	0	0	1	Pth1r	parathyroid hormone 1 receptor	PPR, Pthr, Pthr1		Not expressed among 7 reads	45
	16	Ctnna3	10	64409273	SNV	T	C	NP_001157848.1:p.Leu455Pro	NM_001164376.1:c.1364T>C	NM_177612.3:c.[1364T>C]; NM_001164376.1:c.[1364T>C]; NM_001164519.1:c.[563T>C]; XM_006513475.2:c.[1364T>C]	NP_808280.2:p.[Leu455Pro]; NP_001157848.1:p.[Leu455Pro]; NP_001157991.1:p.[Leu188Pro]; XP_006513538.1:p.[Leu455Pro]	57	40.3509	38.6087	No	200	155	0	0	1	Ctnna3	catenin (cadherin associated protein), alpha 3	4930429L08Rik, 4933408A16, Catna3, Vr22	CTNNA3 has been suggested as a tumor suppressor gene in Neurofibromas and schwannomas (PMID: 27765635 ) and is frequently mutated in laryngeal carcinomas (PMID: 24100690)	Gene not expressed	45
	16	Olfr811	10	129802162	SNV	T	C	NP_666763.1:p.Tyr121Cys	NM_146552.1:c.362A>G	NM_146552.1:c.362A>G	NP_666763.1:p.Tyr121Cys	94	42.5532	37.825	No	200	249	0	0	1	Olfr811	olfactory receptor 811	MOR110-6		Gene not expressed	45
	16	Abca13	11	9345975	SNV	A	C	NP_839990.2:p.Lys3313Asn	NM_178259.3:c.9939A>C	XM_006514706.3:c.[7411-8851A>C]; NM_178259.3:c.[9939A>C]	NP_839990.2:p.Lys3313Asn	66	46.9697	37.8387	No	200	198	0	0	0.968	Abca13	ATP-binding cassette, sub-family A (ABC1), member 13	9830132L24, A930002G16Rik, AI956815		Gene not expressed	45
	16	Ikzf1	11	11754124	SNV	A	G	NP_001020768.1:p.Tyr180Cys	NM_001025597.2:c.539A>G	XM_011243707.2:c.[599A>G]; XM_006514680.3:c.[437A>G]; NM_009578.3:c.[278A>G]; XM_011243716.1:c.[278A>G]; XM_011243701.2:c.[599A>G]; XM_011243704.1:c.[647A>G]; XM_011243708.1:c.[599A>G]; XM_011243718.1:c.[278A>G]; XM_011243713.2:c.[599A>G]; XM_011243706.2:c.[599A>G]; XM_011243710.2:c.[599A>G]; XM_006514682.2:c.[350A>G]; XM_011243705.1:c.[647A>G]; XM_011243711.1:c.[599A>G]; NM_001301863.1:c.[539A>G…	XP_011242009.1:p.[Tyr200Cys]; XP_006514743.1:p.[Tyr146Cys]; NP_033604.2:p.[Tyr93Cys]; XP_011242018.1:p.[Tyr93Cys]; XP_011242003.1:p.[Tyr200Cys]; XP_011242006.1:p.[Tyr216Cys]; XP_011242010.1:p.[Tyr200Cys]; XP_011242020.1:p.[Tyr93Cys]; XP_011242015.1:p.[Tyr200Cys]; XP_011242008.1:p.[Tyr200Cys]; XP_011242012.1:p.[Tyr200Cys]; XP_006514745.1:p.[Tyr117Cys]; XP_011242007.1:p.[Tyr216Cys]; XP_011242013.1:…	34	35.2941	38.6667	No	200	96	0	0	1	Ikzf1	IKAROS family zinc finger 1	5832432G11Rik, hlk-1, Ikaros, LyF-1, mKIAA4227, Zfpn1a1, Znfn1a1	Genetic alterations of the transcription factor IKZF1 ("IKAROS") are detected frequently in B-cell precursor acute lymphoblastic leukemia and are associated with poor prognosis. (PMID: 27957801). Mice with germline mutations that inactivate Ikzf1 develop T-ALL and the resulting malignancies often have activating NOTCH1 mutations (PMID: 16870249 )	Expressed in 22% of 18 reads	45
	16	Dock2	11	34688501	SNV	A	G	NP_203538.2:p.Val695Ala	NM_033374.3:c.2084T>C	XM_017314861.1:c.[2084T>C]; XM_017314862.1:c.[1172T>C]; NM_033374.3:c.[2084T>C]	XP_017170350.1:p.[Val695Ala]; XP_017170351.1:p.[Val391Ala]; NP_203538.2:p.[Val695Ala]	101	41.5842	38.1667	No	200	273	0	0	1	Dock2	dedicator of cyto-kinesis 2	AI662014, AW122239, CED-5, Hch, MBC	DOCK2 participate in regulating cell motility and cytokine production through the activation of Rac in mammalian hematopoietic cells (PMID: 20350533, 29678828 )	No coverage	45
	16	Serpina3m	12	104389163	SNV	A	G	NP_033279.2:p.Ile30Val	NM_009253.2:c.88A>G	XM_006515637.2:c.[60-143A>G]; NM_009253.2:c.[88A>G]	NP_033279.2:p.Ile30Val	44	88.6364	38.2308	No	200	159	0	0	0	Serpina3m	serine (or cysteine) peptidase inhibitor, clade A, member 3M	3e46, AI195004, MMCM7, MMSPi2.4, Spi-2l, Spi-2rs1, spi2, Spi2-rs1, Spi2.4		No coverage	45
	16	Isl1	13	116303218	SNV	G	T	NP_067434.3:p.Thr198Asn	NM_021459.4:c.593C>A	XM_017315398.1:c.[149C>A]; XM_006517533.2:c.[593C>A]; NM_021459.4:c.[593C>A]	XP_017170887.1:p.[Thr50Asn]; XP_006517596.1:p.[Thr198Asn]; NP_067434.3:p.[Thr198Asn]	53	37.7358	37.55	No	200	137	1	0.0073	1	Isl1	ISL1 transcription factor, LIM/homeodomain			Gene not expressed	45
	16	BC005537	13	24812761..24812765	Del	AAATA	-	NP_077793.1:p.Ile231fs	NM_024473.3:c.689_*3delAAATA	NM_024473.3:c.689_*3delAAATA	NP_077793.1:p.Ile231fs	42	16.6667	31.8571	No	200	106	0	0	0.9984	BC005537	cDNA sequence BC005537	8030460C05Rik, C78201		Not expressed in ca 150 reads	45
	16	Arsb	13	93794094..93794102	Del	GTACCCGCT	-	NP_033842.3:p.Thr191_Cys193del	NM_009712.3:c.569_577delGTACCCGCT	NM_009712.3:c.569_577delGTACCCGCT	NP_033842.3:p.Thr191_Cys193del	34	50	36.2941	No	200	112	0	0	0.918333	Arsb	arylsulfatase B	1110007C02Rik, AI480648, As-1, As-1r, As-1s, As-1t, As1, As1-r, As1-s, As1-t, Asr-1, Ast-1		Gene not expressed	45
	16	Muc20	16	32793828	Del	A	-	NP_001139346.1:p.Leu393fs	NM_001145874.1:c.1178delT	NM_001145874.1:c.[1178delT]; NM_146071.2:c.[1178delT]	NP_001139346.1:p.[Leu393fs]; NP_666183.2:p.[Leu393fs]	80	33.75	34.963	No	200	202	0	0	0	Muc20	mucin 20	BC026367		Gene not expressed	45
	16	E4f1	17	24445501	SNV	G	T	NP_001288713.1:p.Cys439*	NM_001301784.1:c.1317C>A	XM_017317224.1:c.[840C>A]; XM_017317223.1:c.[1221C>A]; XM_011246269.2:c.[1317C>A]; NM_007893.4:c.[1314C>A]; XM_011246268.2:c.[1224C>A]; NM_001301784.1:c.[1317C>A]; XM_017317225.1:c.[837C>A]	XP_017172713.1:p.[Cys280*]; XP_017172712.1:p.[Cys407*]; XP_011244571.1:p.[Cys439*]; NP_031919.2:p.[Cys438*]; XP_011244570.1:p.[Cys408*]; NP_001288713.1:p.[Cys439*]; XP_017172714.1:p.[Cys279*]	47	44.6809	37.5238	No	200	124	0	0	0.995	E4f1	E4F transcription factor 1	p120E4F, phi-AP3		Expressed in 36% of 22 reads	45
	16	Trpd52l3	19	30003911	SNV	T	C	NP_080017.1:p.Val22Ala	NM_025741.2:c.65T>C	NM_025741.2:c.65T>C	NP_080017.1:p.Val22Ala	48	100	36.8958	No	200	106	0	0	0.027	Trpd52l3	tumor protein D52-like 3	4931412G03Rik		Gene not expressed	45
	16	Gm26618, AU022751	X	6082006	SNV	C	G	NP_001159905.1:p.Glu439Asp	NM_001166433.1:c.1317G>C	NM_001166433.1:c.[1317G>C]; NM_001033211.3:c.[954G>C]	NP_001159905.1:p.[Glu439Asp]; NP_001028383.2:p.[Glu318Asp]	20	90	38.1667	No	200	158	0	0	0	Gm26618, AU022751	expressed sequence AU022751	AU023811		Gene not expressed	45
	16	Il1rapl1	X	86747672	SNV	C	T	NP_001153875.1:p.Arg554His	NM_001160403.1:c.1661G>A	NM_001160403.1:c.1661G>A	NP_001153875.1:p.Arg554His	51	94.1176	37.9167	No	200	220	1	0.0045	1	Il1rapl1	interleukin 1 receptor accessory protein-like 1	6330532G10Rik, C030039N24, IL1R8, IL1RAPL, MRX34, OPHN4, TIGIRR-2		Gene not expressed	45
	17	Atp2b4	1	133730372	SNV	C	G	XP_006529791.1:p.Arg600Pro	XM_006529728.3:c.1799G>C	XM_006529726.2:c.[1763G>C]; XM_006529724.3:c.[1799G>C]; XM_006529727.2:c.[1799G>C]; NM_213616.4:c.[1799G>C]; XM_006529728.3:c.[1799G>C]; XM_011248038.1:c.[1799G>C]; XM_006529725.2:c.[1799G>C]; NM_001167949.2:c.[1799G>C]; XM_006529723.2:c.[1799G>C]	XP_006529789.1:p.[Arg588Pro]; XP_006529787.1:p.[Arg600Pro]; XP_006529790.1:p.[Arg600Pro]; NP_998781.1:p.[Arg600Pro]; XP_006529791.1:p.[Arg600Pro]; XP_011246340.1:p.[Arg600Pro]; XP_006529788.1:p.[Arg600Pro]; NP_001161421.1:p.[Arg600Pro]; XP_006529786.1:p.[Arg600Pro]	43	37.2093	37.75	No	200	98	0	0	0.998	Atp2b4	ATPase, Ca++ transporting, plasma membrane 4	Pmca4		Expressed in 50 % of 12 reads	45
	17	Notch1	2	26460045	Rep	C	GAGGG	NP_032740.3:p.Arg2361fs	NM_008714.3:c.7082delGinsCCCTC	NM_008714.3:c.7082delGinsCCCTC	NP_032740.3:p.Arg2361fs	41	41.4634	37.8861	No	200	105	0	0	0.996	Notch1	notch 1	9930111A19Rik, lin-12, Mis6, N1, Tan1	Critical for T-cell development but also frequently mutated in T-ALL (PMID: 28115368 ). Mutations either disrupt the negative regulatory region (NRR), an intramolecular lock that protects the extracellular portion of the receptor from cleavage by ADAM10 in the absence of ligand,35,36 or result in truncation of the PEST domain located in the C-terminal portion of NOTCH1 and involved in the termina…	Expressed in 50 % of 574 reads	45
	17	Notch1	2	26466595	SNV	A	T	NP_032740.3:p.Ile1670Asn	NM_008714.3:c.5009T>A	NM_008714.3:c.5009T>A	NP_032740.3:p.Ile1670Asn	101	51.4851	38.75	No	200	240	0	0	1	Notch1	notch 1	9930111A19Rik, lin-12, Mis6, N1, Tan1	Critical for T-cell development but also frequently mutated in T-ALL (PMID: 28115368 ). Mutations either disrupt the negative regulatory region (NRR), an intramolecular lock that protects the extracellular portion of the receptor from cleavage by ADAM10 in the absence of ligand,35,36 or result in truncation of the PEST domain located in the C-terminal portion of NOTCH1 and involved in the termina…	Expressed in 50 % of 332 reads	45
	17	Zfp804a	2	82257825	SNV	C	G	XP_011237824.1:p.Thr666Arg	XM_011239522.2:c.1997C>G	NM_175513.3:c.[1997C>G]; XM_011239522.2:c.[1997C>G]	NP_780722.2:p.[Thr666Arg]; XP_011237824.1:p.[Thr666Arg]	58	46.5517	38.4815	No	200	191	0	0	0.028	Zfp804a	zinc finger protein 804A	C630007C17Rik, Znf804a		Gene not expressed	45
	17	Adnp, Dpm1-adnp	2	168183172	SNV	A	C	NP_001297015.1:p.Asp734Glu	NM_001310086.1:c.2202T>G	NM_009628.3:c.[2202T>G]; NM_001310088.1:c.[1518T>G]; NM_001310086.1:c.[2202T>G]	NP_033758.2:p.[Asp734Glu]; NP_001297017.1:p.[Asp506Glu]; NP_001297015.1:p.[Asp734Glu]	74	51.3514	38.8421	No	200	149	0	0	0	Adnp, Dpm1-adnp	activity-dependent neuroprotective protein, Dpm1-adnp readthrough	AA589558, mKIAA0784		Expressed in 50 % of 134 reads	45
	17	Hist2h2bb	3	96269863^96269864	Ins	-	GGGGGG	NP_783597.2:p.Tyr38delinsTrpGlyAsp	NM_175666.2:c.112_113insGGGGGG	NM_175666.2:c.112_113insGGGGGG	NP_783597.2:p.Tyr38delinsTrpGlyAsp	72	45.8333	37.9278	No	200	188	0	0		Hist2h2bb	histone cluster 2, H2bb	H2b-616		Expressed in 50 % of 10 reads	45
	17	Mpdz	4	81383829	SNV	G	A	XP_006537706.1:p.Pro227Leu	XM_006537643.3:c.680C>T	XM_006537650.3:c.[680C>T]; XM_006537643.3:c.[680C>T]; XM_006537644.3:c.[680C>T]; XM_006537649.3:c.[680C>T]; NM_001305286.1:c.[680C>T]; XM_006537646.3:c.[680C>T]; NM_001305284.1:c.[680C>T]; XM_006537647.3:c.[680C>T]; XM_011249940.2:c.[680C>T]; NM_010820.3:c.[680C>T]	XP_006537713.1:p.[Pro227Leu]; XP_006537706.1:p.[Pro227Leu]; XP_006537707.1:p.[Pro227Leu]; XP_006537712.1:p.[Pro227Leu]; NP_001292215.1:p.[Pro227Leu]; XP_006537709.1:p.[Pro227Leu]; NP_001292213.1:p.[Pro227Leu]; XP_006537710.1:p.[Pro227Leu]; XP_011248242.1:p.[Pro227Leu]; NP_034950.2:p.[Pro227Leu]	44	100	38.0227	No	200	94	1	0.011	1	Mpdz	multiple PDZ domain protein	AI225843, B930003D11Rik, MUPP1	Angiogenesis is coordinated by VEGF and Notch signaling. MPDZ enhances Notch signaling activity and physically interacts with the intracellular carboxyterminus of DLL1 and DLL4 and enables their interaction with the adherens junction protein Nectin-2. Inactivation of the MPDZ gene leads to impaired Notch signaling activity and increased blood vessel sprouting (PMID: 29620522)	Gene not expressed	45
	17	Zfp804b	5	6772601	SNV	A	T	NP_001156695.1:p.Val154Asp	NM_001163223.1:c.461T>A	NM_001163223.1:c.461T>A	NP_001156695.1:p.Val154Asp	69	52.1739	37.3333	No	200	196	0	0	0	Zfp804b	zinc finger protein 804B	Gm441		Gene not expressed	45
	17	Drc1	5	30366503	SNV	G	T	XP_017176442.1:p.Glu710*	XM_017320953.1:c.2128G>T	XM_017320954.1:c.[1597G>T]; NM_001033460.3:c.[2215G>T]; XM_017320955.1:c.[1597G>T]; XM_017320953.1:c.[2128G>T]	XP_017176443.1:p.[Glu533*]; NP_001028632.1:p.[Glu739*]; XP_017176444.1:p.[Glu533*]; XP_017176442.1:p.[Glu710*]	59	40.678	38.125	No	200	125	1	0.008	0.924	Drc1	dynein regulatory complex subunit 1	b2b1654Clo, Ccdc164, Gm1060		Gene not expressed	45
	17	Klrg2	6	38628113	SNV	T	C	XP_006506774.1:p.Thr339Ala	XM_006506711.3:c.1015A>G	NM_001033171.2:c.[1015A>G]; XM_006506711.3:c.[1015A>G]	NP_001028343.2:p.[Thr339Ala]; XP_006506774.1:p.[Thr339Ala]	48	39.5833	37	No	200	108	0	0	0.974	Klrg2	killer cell lectin-like receptor subfamily G, member 2	2310020F24Rik		Gene not expressed	45
	17	Tcrb, Trbv13-3	6	41130580	SNV	G	C	Trbv13-3:p.Ser112Thr	Trbv13-3:c.335G>C	Trbv13-3:c.335G>C	Trbv13-3:p.Ser112Thr	65	46.1538	38.1667	No	200	84	0	0	0.764	Tcrb, Trbv13-3	T cell receptor beta chain, T cell receptor beta, variable 13-3	TCRbeta, Tib, Gm16777, Tcrb-V8, Tcrb-V8.1		Expressed in 100 % of 3000 reads	45
	17	Tcrb, Trbj2-7	6	41543819	SNV	A	C	Trbj2-7:p.Thr4Pro	Trbj2-7:c.10A>C	Trbj2-7:c.10A>C	Trbj2-7:p.Thr4Pro	55	40	37.5	No	200	145	0	0	0.891	Tcrb, Trbj2-7	T cell receptor beta chain, T cell receptor beta joining 2-7	TCRbeta, Tib, Gm16807		Expressed in 3 % of 100 reads	45
	17	Cbarp	10	80131325	SNV	G	A	XP_006513028.2:p.Ala687Val	XM_006512965.3:c.2060C>T	XM_006512976.2:c.[1259C>T]; XM_006512970.2:c.[1847C>T]; NM_001195268.1:c.[2060C>T]; XM_006512971.3:c.[1847C>T]; XM_006512978.2:c.[1259C>T]; XM_006512965.3:c.[2060C>T]; XM_006512969.2:c.[2060C>T]; XM_006512972.2:c.[1847C>T]; XM_006512974.2:c.[1259C>T]; XM_006512977.2:c.[1259C>T]; XM_006512968.3:c.[2078C>T]; XM_006512967.3:c.[2114C>T]	XP_006513039.1:p.[Ala420Val]; XP_006513033.1:p.[Ala616Val]; NP_001182197.1:p.[Ala687Val]; XP_006513034.1:p.[Ala616Val]; XP_006513041.1:p.[Ala420Val]; XP_006513028.2:p.[Ala687Val]; XP_006513032.1:p.[Ala687Val]; XP_006513035.1:p.[Ala616Val]; XP_006513037.1:p.[Ala420Val]; XP_006513040.1:p.[Ala420Val]; XP_006513031.1:p.[Ala693Val]; XP_006513030.1:p.[Ala705Val]	42	57.1429	38	No	200	92	0	0	0.435	Cbarp	calcium channel, voltage-dependent, beta subunit associated regulatory protein	9630008F14, Dos, R29144/1		Expressed in 50 % of 12 reads	45
	17	Zfp521	18	13843870	SNV	C	A	XP_006525883.1:p.Arg942Leu	XM_006525820.3:c.2825G>T	NM_145492.4:c.[3485G>T]; XM_006525820.3:c.[2825G>T]; XM_011246894.1:c.[3485G>T]; XM_006525819.3:c.[2825G>T]	NP_663467.1:p.[Arg1162Leu]; XP_006525883.1:p.[Arg942Leu]; XP_011245196.1:p.[Arg1162Leu]; XP_006525882.1:p.[Arg942Leu]	62	53.2258	38.7273	No	200	188	0	0	1	Zfp521	zinc finger protein 521	B930086A16Rik, Evi3, Znf521	ZFP521 regulates hematopoietic stem cell self-renewal and differentiation. Transcriptional analysis of human AML patient samples revealed that ZNF521 is highly and specifically upregulated in AMLs with MLL translocations (PMID: 28615219). Zfp521 has been found to cause B-cell leukemia in mice when over-expressed (PMID: 26522721)	Gene not expressed	45
	17	CYTB	MT	14263	SNV	G	A	NP_904340.1:p.Cys40Tyr	NP_904340.1:c.119G>A	NP_904340.1:c.119G>A	NP_904340.1:p.Cys40Tyr	275	65.0909	38.1061	No	200	542	0	0	1	CYTB				Expressed in 70 % of 11000 reads	45
	17	Stag2	X	42228308	SNV	T	A	XP_011249290.1:p.Tyr331Asn	XM_011250988.1:c.991T>A	XM_011250989.2:c.[991T>A]; NM_021465.4:c.[991T>A]; XM_017318446.1:c.[991T>A]; NM_001077712.2:c.[991T>A]; XM_011250985.2:c.[991T>A]; XM_011250987.1:c.[991T>A]; XM_011250986.2:c.[991T>A]; XM_011250988.1:c.[991T>A]; XM_011250983.2:c.[991T>A]; XM_011250984.2:c.[991T>A]; NM_001290713.1:c.[991T>A]	XP_011249291.1:p.[Tyr331Asn]; NP_067440.3:p.[Tyr331Asn]; XP_017173935.1:p.[Tyr331Asn]; NP_001071180.1:p.[Tyr331Asn]; XP_011249287.1:p.[Tyr331Asn]; XP_011249289.1:p.[Tyr331Asn]; XP_011249288.1:p.[Tyr331Asn]; XP_011249290.1:p.[Tyr331Asn]; XP_011249285.1:p.[Tyr331Asn]; XP_011249286.1:p.[Tyr331Asn]; NP_001277642.1:p.[Tyr331Asn]	76	17.1053	39	No	200	342	0	0	1	Stag2	stromal antigen 2	9230105L23Rik, B230112I07Rik, SA-2, SAP2	Mutations in STAG2 has been found in AML (PMID: 27470916 ) but has not seen in neuroblastoma (PMID: 24088605 )	Expressed in 3 % of 114 reads	45
	17	L1cam	X	73860108	SNV	A	G	NP_032504.3:p.Val682Ala	NM_008478.3:c.2045T>C	NM_008478.3:c.[2045T>C]; XM_006527860.2:c.[2030T>C]; XM_006527861.3:c.[2030T>C]; XM_006527859.3:c.[2045T>C]	NP_032504.3:p.[Val682Ala]; XP_006527923.1:p.[Val677Ala]; XP_006527924.1:p.[Val677Ala]; XP_006527922.1:p.[Val682Ala]	30	93.3333	38.7857	No	200	159	0	0	1	L1cam	L1 cell adhesion molecule	CD171, L1, N-CAM-L1, NCAM-L1	Overexpression of L1CAM is associated with increased risk of recurrence and invasion in different cancer types (PMID: 2674347, 228535665)	Expressed in 100 % of 2 reads	45
	18	Pydc4	1	173589892	SNV	T	G	XP_011237152.1:p.Lys318Thr	XM_011238850.2:c.953A>C	XM_011238852.1:c.[953A>C]; XM_017321890.1:c.[533A>C]; XM_011238850.2:c.[953A>C]; XM_011238851.1:c.[953A>C]	XP_011237154.1:p.[Lys318Thr]; XP_017177379.1:p.[Lys178Thr]; XP_011237152.1:p.[Lys318Thr]; XP_011237153.1:p.[Lys318Thr]	29	31.0345	38.6667	No	200	22	1	0.045	0.042	Pydc4	pyrin domain containing 4	E030037K03Rik, E430029J22Rik		Gene not expressed	45
	18	Olfr420	1	174159262..174159263	Del	TC	-	NP_666417.2:p.Ser164fs	NM_146305.2:c.488_489delTC	NM_146305.2:c.488_489delTC	NP_666417.2:p.Ser164fs	142	46.4789	34.8939	No	200	276	0	0	0.012	Olfr420	olfactory receptor 420	MOR105-10		Gene not expressed	45
	18	Chrna1	2	73566279	SNV	A	C	NP_031415.2:p.Met424Arg	NM_007389.5:c.1271T>G	NM_007389.5:c.1271T>G	NP_031415.2:p.Met424Arg	112	41.9643	38.4468	No	200	131	0	0	1	Chrna1	cholinergic receptor, nicotinic, alpha polypeptide 1 (muscle)	Achr-1, Acra, AI385656, AI608266		Low expression - 1 read support	45
	18	Ttn	2	76793249	SNV	T	C	XP_017172628.1:p.Asp15364Gly	XM_017317139.1:c.46091A>G	NM_028004.2:c.[21002A>G]; NM_011652.3:c.[40745A>G]; XM_017317139.1:c.[46091A>G]; XM_011239438.1:c.[43262A>G]	NP_082280.2:p.[Asp7001Gly]; NP_035782.3:p.[Asp13582Gly]; XP_017172628.1:p.[Asp15364Gly]; XP_011237740.1:p.[Asp14421Gly]	83	33.7349	38.1071	No	200	148	0	0	0.984	Ttn	titin	1100001C23Rik, 2310036G12Rik, 2310057K23Rik, 2310074I15Rik, AF006999, AV006427, D330041I19Rik, D830007G01Rik, L56, mdm, shru		Gene not expressed	45
	18	Matn4	2	164392877	SNV	T	C	XP_011237633.1:p.His570Arg	XM_011239331.2:c.1709A>G	NM_001252563.1:c.[1673A>G]; XM_011239331.2:c.[1709A>G]; NM_013592.4:c.[1673A>G]	NP_001239492.1:p.[His558Arg]; XP_011237633.1:p.[His570Arg]; NP_038620.2:p.[His558Arg]	29	51.7241	37.4	No	200	63	0	0	1	Matn4	matrilin 4	matrilin-4		Low expression - 2 read support	45
	18	Celf3	3	94488273	SNV	C	G	XP_006502387.1:p.Arg402Gly	XM_006502324.2:c.1204C>G	XM_006502329.2:c.[979C>G]; XM_006502325.2:c.[1123C>G]; XM_006502330.2:c.[979C>G]; XM_006502338.3:c.[979C>G]; XM_006502335.2:c.[907C>G]; XM_006502332.2:c.[976C>G]; XM_017319810.1:c.[895C>G]; XM_011240286.1:c.[595C>G]; NM_001289620.1:c.[842-254C>G]; XM_006502327.2:c.[1073-254C>G]; XM_006502334.2:c.[976C>G]; XM_006502331.2:c.[979C>G]; XM_011240284.1:c.[1070-254C>G]; XM_006502324.2:c.[1204C>G]; XM_00…	XP_006502392.1:p.[Arg327Gly]; XP_006502388.1:p.[Arg375Gly]; XP_006502393.1:p.[Arg327Gly]; XP_006502401.1:p.[Arg327Gly]; XP_006502398.1:p.[Arg303Gly]; XP_006502395.1:p.[Arg326Gly]; XP_017175299.1:p.[Arg299Gly]; XP_011238588.1:p.[Arg199Gly]; XP_006502397.1:p.[Arg326Gly]; XP_006502394.1:p.[Arg327Gly]; XP_006502387.1:p.[Arg402Gly]; XP_006502386.1:p.[Arg403Gly]; NP_001276542.1:p.[Arg403Gly]; NP_766022…	19	63.1579	37.8333	No	200	43	0	0	0.073	Celf3	CUGBP, Elav-like family member 3	4930415M08Rik, BRUNOL1, CAGH4, ERDA4, Tnrc4		Low expression - 1 read support	45
	18	Dock7, Angptl3	4	99032132	SNV	G	T		XM_006503308.3:c.1683-8673C>A	XM_006503311.3:c.[1683-8673C>A]; XM_006503308.3:c.[1683-8673C>A]; NM_013913.4:c.[542G>T]; XM_006503315.3:c.[1683-8673C>A]; XM_006503313.3:c.[1683-8673C>A]; XM_017320362.1:c.[1359-8673C>A]; XM_006503314.3:c.[1683-8673C>A]; XM_006503310.3:c.[1683-8673C>A]; XM_006503309.3:c.[1683-8673C>A]; NM_026082.5:c.[1683-8673C>A]; NM_001290636.1:c.[1683-8673C>A]	NP_038941.1:p.Ser181Ile	137	34.3066	38.4894	No	200	251	0	0	0.23	Dock7, Angptl3	dedicator of cytokinesis 7, angiopoietin-like 3	3110056M06Rik, Gm430, m, hypl		Gene not expressed	45
	18	Ppargc1a	5	51495726	SNV	G	T	XP_017176206.1:p.Gln40Lys	XM_017320717.1:c.118C>A	XM_017320717.1:c.[118C>A]; XM_006503774.3:c.[532C>A]; NM_008904.2:c.[493C>A]; XM_017320718.1:c.[118C>A]; XM_006503779.3:c.[532C>A]; XM_006503778.3:c.[448C>A]; XM_006503776.3:c.[463C>A]; XM_006503777.3:c.[454C>A]; XM_006503775.1:c.[481C>A]; XM_017320716.1:c.[118C>A]	XP_017176206.1:p.[Gln40Lys]; XP_006503837.1:p.[Gln178Lys]; NP_032930.1:p.[Gln165Lys]; XP_017176207.1:p.[Gln40Lys]; XP_006503842.1:p.[Gln178Lys]; XP_006503841.1:p.[Gln150Lys]; XP_006503839.1:p.[Gln155Lys]; XP_006503840.1:p.[Gln152Lys]; XP_006503838.1:p.[Gln161Lys]; XP_017176205.1:p.[Gln40Lys]	99	39.3939	38.5897	No	200	156	0	0	1	Ppargc1a	peroxisome proliferative activated receptor, gamma, coactivator 1 alpha	A830037N07Rik, ENSMUSG00000079510, Gm11133, PGC-1, Pgc-1alpha, Pgc1, Pgco1, PPARGC-1-alpha, Ppargc1		Gene not expressed	45
	18	Cyp26b1	6	84576642	SNV	G	A	XP_006506035.1:p.Arg61Cys	XM_006505972.3:c.181C>T	XM_011241300.2:c.[181C>T]; XM_006505972.3:c.[181C>T]; NM_175475.3:c.[754C>T]; NM_001177713.1:c.[754C>T]	XP_011239602.1:p.[Arg61Cys]; XP_006506035.1:p.[Arg61Cys]; NP_780684.1:p.[Arg252Cys]; NP_001171184.1:p.[Arg252Cys]	74	39.1892	37	No	200	110	1	0.0091	1	Cyp26b1	cytochrome P450, family 26, subfamily b, polypeptide 1	CP26, P450RAI-2		Gene not expressed	45
	18	Mitf	6	97994391	SNV	A	G	XP_006505754.1:p.Lys170Arg	XM_006505691.3:c.509A>G	XM_006505694.1:c.[437A>G]; XM_006505693.1:c.[437A>G]; XM_006505692.3:c.[437A>G]; XM_006505684.2:c.[590A>G]; NM_001113198.1:c.[593A>G]; NM_008601.3:c.[272A>G]; XM_006505685.3:c.[593A>G]; XM_011241244.2:c.[89A>G]; XM_017321428.1:c.[506A>G]; NM_001178049.1:c.[545A>G]; XM_006505695.3:c.[272A>G]; XM_006505691.3:c.[509A>G]; XM_006505696.1:c.[248A>G]; XM_006505689.3:c.[542A>G]	XP_006505757.1:p.[Lys146Arg]; XP_006505756.1:p.[Lys146Arg]; XP_006505755.1:p.[Lys146Arg]; XP_006505747.1:p.[Lys197Arg]; NP_001106669.1:p.[Lys198Arg]; NP_032627.1:p.[Lys91Arg]; XP_006505748.1:p.[Lys198Arg]; XP_011239546.1:p.[Lys30Arg]; XP_017176917.1:p.[Lys169Arg]; NP_001171520.1:p.[Lys182Arg]; XP_006505758.1:p.[Lys91Arg]; XP_006505754.1:p.[Lys170Arg]; XP_006505759.1:p.[Lys83Arg]; XP_006505752.1:p…	20	45	39.3333	No	200	28	1	0.0357	1	Mitf	microphthalmia-associated transcription factor	BCC2, Bhlhe32, bw, Gsfbcc2, mi, vit, Vitiligo, Wh	Increased MITF levels has been associated with FBXW7 mutations in melanoma (PMID: 29665239) and has also been linked to regulation of innate immunsystem (PMID: 29723194).	Gene not expressed	45
	18	Cd69	6	129271374	SNV	G	A	XP_006505526.1:p.Leu37Phe	XM_006505463.1:c.109C>T	XM_006505463.1:c.[109C>T]; NM_001033122.3:c.[148C>T]	XP_006505526.1:p.[Leu37Phe]; NP_001028294.1:p.[Leu50Phe]	74	41.8919	38.2903	No	200	138	1	0.0072	0.997	Cd69	CD69 antigen	5830438K24Rik, AI452015, AIM, VEA		Expressed- 1 read support	45
	18	Ceacam14	7	17815407	SNV	C	T	XP_006540367.1:p.Thr274Ile	XM_006540304.3:c.821C>T	XM_006540305.3:c.[*138C>T]; NM_025957.4:c.[722C>T]; XM_006540304.3:c.[821C>T]	NP_080233.1:p.[Thr241Ile]; XP_006540367.1:p.[Thr274Ile]	126	38.8889	37.6939	No	200	202	0	0	0.19	Ceacam14	carcinoembryonic antigen-related cell adhesion molecule 14	1600021E03Rik, 1600025E09Rik, AV033953		Gene not expressed	45
	18	Pin1	9	20655388	SNV	A	C	NP_075860.1:p.Thr29Pro	NM_023371.3:c.85A>C	NM_023371.3:c.85A>C	NP_075860.1:p.Thr29Pro	37	37.8378	36.7857	No	200	76	0	0	1	Pin1	protein (peptidyl-prolyl cis/trans isomerase) NIMA-interacting 1	0610025L01Rik, D9Bwg1161e	PIN1 regulates Notch3 through protein processing and stabilization and combined inhibition iof Notch3 and Pin1 n TALL-1 cells reduces their invasive capacity (PMID: 26876201). Pin1 is required for sustained B cell proliferation upon oncogenic activation of Myc (PMID: 26943576). Furthermore, ablation of PIN1 in p53 null mice led to increased thymic hyperplasia and waw associated with increased lev…	Expressed in 50% of ca 400 reads	45
	18	Ctnnb1	9	120950642	SNV	C	A	NP_031640.1:p.Ser45Tyr	NM_007614.3:c.134C>A	NM_007614.3:c.[134C>A]; NM_001165902.1:c.[134C>A]	NP_031640.1:p.[Ser45Tyr]; NP_001159374.1:p.[Ser45Tyr]	67	40.2985	37.7407	No	200	106	1	0.0094	1	Ctnnb1	catenin (cadherin associated protein), beta 1	Bfc, Catnb, Mesc	It has been suggested that leukemogenesis and leukemic-initiating cell capacity induced by Notch1 is dependent on the levels of β-Catenin as inhibition of β-Catenin compromised survival and proliferation of human T-ALL cell lines carrying activated Notch1 (PMID: 27125305). Mutations at the hot spot residue SerS45 mutations abolish the CK1alpha phosphorylation site of beta-catenin, which, via its …	Expressed in 50 % of ca 200 reads	45
	18	Gm11595	11	99772284	SNV	C	T	NP_001119794.1:p.Arg190His	NM_001126322.1:c.569G>A	NM_001126322.1:c.569G>A	NP_001119794.1:p.Arg190His	98	48.9796	36.9375	No	200	172	0	0	0	Gm11595	predicted gene 11595	OTTMUSG00000002543		Gene not expressed	45
	18	Tcrg, Tcrg-V1	13	19340445	SNV	T	C	Tcrg-V1:p.Val113Ala	Tcrg-V1:c.338T>C	Tcrg-V1:c.338T>C	Tcrg-V1:p.Val113Ala	92	27.1739	36.88	No	200	139	0	0	0	Tcrg, Tcrg-V1	T cell receptor gamma chain, T cell receptor gamma, variable 1	TCRGV1S1, TCRGV2S1, TCRGV3S1, TCRGV5S3, Gm16602, TRGV1		Expressed in 50 % of ca 350 reads	45
	18	Hr	14	70559767	SNV	G	A	XP_011243268.1:p.Gly508Ser	XM_011244966.1:c.1522G>A	XM_011244966.1:c.[1522G>A]; NM_021877.3:c.[1522G>A]	XP_011243268.1:p.[Gly508Ser]; NP_068677.2:p.[Gly508Ser]	73	52.0548	37.7368	No	200	93	0	0	0	Hr	hairless	ALUNC, AU, ba, bldy, N, rh, rh-bmh, rhino		Not expressed among 4 reads	45
	18	Cldn34b3	X	76266832	SNV	C	T	NP_001013782.1:p.Pro2Leu	NM_001013760.2:c.5C>T	NM_001013760.2:c.5C>T	NP_001013782.1:p.Pro2Leu	138	33.3333	37.7174	No	200	268	1	0.0037	0.118	Cldn34b3	claudin 34B3	EG238829, Gm4937		Gene not expressed	45
	18	Apex2	X	150552189	SNV	G	A		XM_011247878.2:c.637-29979C>T	NM_009653.3:c.[26G>A]; XM_011247878.2:c.[637-29979C>T]; XM_011247880.2:c.[667-28985C>T]; NM_001102446.1:c.[26G>A]; XM_011247877.2:c.[667-29979C>T]	NP_033783.1:p.[Arg9Gln]; NP_001095916.1:p.[Arg9Gln]	60	36.6667	39.1364	No	200	84	0	0	0.367	Apex2	apurinic/apyrimidinic endonuclease 2	ape2, C430040P13Rik, ALAS, Alas-2, ALAS-E, ALASE		No coverage	45
	19	Notch1	2	26459983	SNV	G	A	NP_032740.3:p.Gln2382*	NM_008714.3:c.7144C>T	NM_008714.3:c.7144C>T	NP_032740.3:p.Gln2382*	31	38.7097	37.75	No	200	105	0	0	1	Notch1	notch 1	9930111A19Rik, lin-12, Mis6, N1, Tan1	Critical for T-cell development but also frequently mutated in T-ALL (PMID: 28115368 ). Mutations either disrupt the negative regulatory region (NRR), an intramolecular lock that protects the extracellular portion of the receptor from cleavage by ADAM10 in the absence of ligand,35,36 or result in truncation of the PEST domain located in the C-terminal portion of NOTCH1 and involved in the termina…	Expressed in 50 % of 900 reads	45
	19	Notch1	2	26466595	SNV	A	T	NP_032740.3:p.Ile1670Asn	NM_008714.3:c.5009T>A	NM_008714.3:c.5009T>A	NP_032740.3:p.Ile1670Asn	89	44.9438	38.425	No	200	240	0	0	1	Notch1	notch 1	9930111A19Rik, lin-12, Mis6, N1, Tan1	Critical for T-cell development but also frequently mutated in T-ALL (PMID: 28115368 ). Mutations either disrupt the negative regulatory region (NRR), an intramolecular lock that protects the extracellular portion of the receptor from cleavage by ADAM10 in the absence of ligand,35,36 or result in truncation of the PEST domain located in the C-terminal portion of NOTCH1 and involved in the termina…	Expressed in 50 % of 600 reads	45
	19	Olfr1099	2	86958922	Del	A	-	NP_666979.1:p.Cys179fs	NM_146768.1:c.535delT	NM_146768.1:c.535delT	NP_666979.1:p.Cys179fs	92	68.4783	34.0476	Yes	200	257	1	0.0039	1	Olfr1099	olfactory receptor 1099	MOR206-3		Gene not expressed	45
	19	Cntn4	6	106667501	SNV	C	T	XP_006506257.1:p.Pro637Ser	XM_006506194.3:c.1909C>T	XM_006506194.3:c.[1909C>T]; XM_017321599.1:c.[1909C>T]; XM_006506197.2:c.[1909C>T]; XM_006506193.2:c.[1909C>T]; XM_017321598.1:c.[1906C>T]; NM_001109749.1:c.[1909C>T]; XM_006506198.2:c.[1906C>T]; NM_173004.3:c.[1909C>T]; XM_006506196.2:c.[1906C>T]; NM_001109751.1:c.[1909C>T]; XM_006506195.3:c.[1909C>T]	XP_006506257.1:p.[Pro637Ser]; XP_017177088.1:p.[Pro637Ser]; XP_006506260.1:p.[Pro637Ser]; XP_006506256.1:p.[Pro637Ser]; XP_017177087.1:p.[Pro636Ser]; NP_001103219.1:p.[Pro637Ser]; XP_006506261.1:p.[Pro636Ser]; NP_766592.2:p.[Pro637Ser]; XP_006506259.1:p.[Pro636Ser]; NP_001103221.1:p.[Pro637Ser]; XP_006506258.1:p.[Pro637Ser]	45	33.3333	39	No	200	107	0	0	1	Cntn4	contactin 4	9630050B05, Axcam, BIG-2		Gene not expressed	45
	19	Prrt3	6	113498211	SNV	G	T	XP_006505906.1:p.Leu17Met	XM_006505843.3:c.49C>A	NM_001289700.1:c.[49C>A]; XM_011241275.1:c.[49C>A]; NM_001289699.1:c.[49C>A]; NM_172487.4:c.[49C>A]; XM_006505843.3:c.[49C>A]	NP_001276629.1:p.[Leu17Met]; XP_011239577.1:p.[Leu17Met]; NP_001276628.1:p.[Leu17Met]; NP_766075.2:p.[Leu17Met]; XP_006505906.1:p.[Leu17Met]	45	51.1111	38.5217	No	200	115	0	0	0.994	Prrt3	proline-rich transmembrane protein 3	6330505P20, B230206N24Rik		Gene not expressed	45
	19	Trp53	11	69589608	SNV	G	A	XP_006533220.1:p.Arg270His	XM_006533157.3:c.809G>A	NM_001127233.1:c.[809G>A]; NM_011640.3:c.[809G>A]; XM_006533157.3:c.[809G>A]	NP_001120705.1:p.[Arg270His]; NP_035770.2:p.[Arg270His]; XP_006533220.1:p.[Arg270His]	37	59.4595	38.6818	No	200	85	0	0	0.999	Trp53	transformation related protein 53	bbl, bfy, bhy, p44, p53, Tp53	Equals to human hotspot mutation p53 R273H. Dysfunction of TP53, including copy number alterations of TP53 pathway and TP53 itself, dysregulation of TP53 regulators, and somatic mutations by abnormal TP53 function modes, play an important role in lymphoma generation, progression and invasion (PMID: 26315382 )	Expressed in 50 % of 350 reads	45
	19	Gas2l1	11	5061794^5061795	Ins	-	G		NM_030228.3:c.1010+360_1010+361insC	NM_030228.3:c.[1010+360_1010+361insC]; NM_001190406.1:c.[*49+360_*49+361insC]; NM_144560.3:c.[1033_1034insC]; XM_017314850.1:c.[*72_*73insC]; NM_001190408.1:c.[1033_1034insC]; XM_017314849.1:c.[*72_*73insC]	NP_653146.1:p.[Leu345fs]; NP_001177337.1:p.[Leu345fs]	29	27.5862	38.875	Yes	200	55	0	0		Gas2l1	growth arrest-specific 2 like 1	4930500E24Rik, D0Jmb1, Gar22, TU-71.1		Expressed in 20 % of 11 reads	45
	19	Ncam2	16	81455302	SNV	T	C	NP_035084.1:p.Ile211Thr	NM_010954.4:c.632T>C	NM_001113208.1:c.[632T>C]; NM_010954.4:c.[632T>C]	NP_001106679.1:p.[Ile211Thr]; NP_035084.1:p.[Ile211Thr]	87	50.5747	38.6136	No	200	214	0	0	1	Ncam2	neural cell adhesion molecule 2	Ncam-2, Ocam, RNCAM		Gene not expressed	45
	19	Vmn2r104	17	20048054	SNV	G	T	NP_001098036.1:p.Pro51His	NM_001104566.1:c.152C>A	NM_001104566.1:c.152C>A	NP_001098036.1:p.Pro51His	70	47.1429	37.9394	No	200	164	0	0	0.508	Vmn2r104	vomeronasal 2, receptor 104	V2r7		Gene not expressed	45
	19	ND5	MT	13176	SNV	G	A	NP_904338.1:p.Val479Ile	NP_904338.1:c.1435G>A	NP_904338.1:c.1435G>A	NP_904338.1:p.Val479Ile	357	33.6134	37.925	No	200	433	0	0	0	ND5	Mitocondrial			Expressed in 33 % of 3000 reads	45
	20	Dnah7c	1	46658222	SNV	G	A	XP_011236933.1:p.Arg2123Gln	XM_011238631.2:c.6368G>A	XM_011238631.2:c.[6368G>A]; NM_001310335.1:c.[6296G>A]; XM_006496387.3:c.[1559G>A]	XP_011236933.1:p.[Arg2123Gln]; NP_001297264.1:p.[Arg2099Gln]; XP_006496450.1:p.[Arg520Gln]	134	27.6119	38.8649	No	200	276	1	0.0036	1	Dnah7c	dynein, axonemal, heavy chain 7C	Dnahc7c		Gene not expressed	42
	20	Notch1	2	26467980	SNV	T	C	NP_032740.3:p.Asp1546Gly	NM_008714.3:c.4637A>G	NM_008714.3:c.4637A>G	NP_032740.3:p.Asp1546Gly	22	50	38.9091	No	200	117	0	0	1	Notch1	notch 1	9930111A19Rik, lin-12, Mis6, N1, Tan1	Critical for T-cell development but also frequently mutated in T-ALL (PMID: 28115368 ). Mutations either disrupt the negative regulatory region (NRR), an intramolecular lock that protects the extracellular portion of the receptor from cleavage by ADAM10 in the absence of ligand,35,36 or result in truncation of the PEST domain located in the C-terminal portion of NOTCH1 and involved in the termina…	Expressed in 50 % of 140 reads	42
	20	Btbd3	2	138279786	SNV	G	A	NP_663509.2:p.Val130Ile	NM_145534.2:c.388G>A	NM_001025431.1:c.[181G>A]; NM_145534.2:c.[388G>A]; XM_006499294.2:c.[-37+529G>A]	NP_001020602.1:p.[Val61Ile]; NP_663509.2:p.[Val130Ile]	127	18.8976	38.7917	No	200	319	0	0	1	Btbd3	BTB (POZ) domain containing 3	mKIAA0952		Gene not expressed	42
	20	Vmn1r175	7	23808878	SNV	A	G	NP_001160199.1:p.Phe108Ser	NM_001166727.1:c.323T>C	NM_001166727.1:c.323T>C	NP_001160199.1:p.Phe108Ser	22	90.9091	37.3	No	200	10	1	10	0.857	Vmn1r175	vomeronasal 1 receptor 175	EG622222, Gm6299		Gene not expressed	42
	20	Olfr535	7	140493348	SNV	A	G	NP_667165.1:p.Arg237Gly	NM_146954.1:c.709A>G	NM_146954.1:c.709A>G	NP_667165.1:p.Arg237Gly	293	50.8532	37.9732	No	200	630	1	0.0016	0.003	Olfr535	olfactory receptor 535	MOR253-7		Gene not expressed	42
	20	Col4a1	8	11247058	SNV	C	A	NP_034061.2:p.Gly61Val	NM_009931.2:c.182G>T	XM_017312555.1:c.[182G>T]; NM_009931.2:c.[182G>T]	XP_017168044.1:p.[Gly61Val]; NP_034061.2:p.[Gly61Val]	109	31.1927	37.3529	No	200	192	1	0.0052	1	Col4a1	collagen, type IV, alpha 1	Bru, Col4a-1, Raw, Svc		Expressed in 0 % of 100 reads	42
	20	Ccr2	9	124106659	SNV	C	A	XP_011241365.1:p.Phe325Leu	XM_011243063.1:c.975C>A	XM_011243064.2:c.[975C>A]; XM_006512428.2:c.[975C>A]; XM_011243063.1:c.[975C>A]; NM_009915.2:c.[975C>A]	XP_011241366.1:p.[Phe325Leu]; XP_006512491.1:p.[Phe325Leu]; XP_011241365.1:p.[Phe325Leu]; NP_034045.1:p.[Phe325Leu]	89	51.6854	38.3478	No	200	212	0	0	1	Ccr2	chemokine (C-C motif) receptor 2	Cc-ckr-2, Ccr2a, Ccr2b, Ckr2, Ckr2a, Ckr2b, Cmkbr2, mJe-r	CCR2B is upregulated in the EBV-positive Burkitt Lymphoma cells with latency III (PMID: 29751565)	Expressed in 66 % of 3 reads	42
	20	Ddx3x	X	13289937	SNV	A	G	XP_006527629.1:p.Glu423Gly	XM_006527566.3:c.1268A>G	XM_006527566.3:c.[1268A>G]; NM_010028.3:c.[1271A>G]	XP_006527629.1:p.[Glu423Gly]; NP_034158.1:p.[Glu424Gly]	58	70.6897	37.6829	No	200	244	0	0	1	Ddx3x	DEAD/H (Asp-Glu-Ala-Asp/His) box polypeptide 3, X-linked	D1Pas1-rs2, Ddx3, Fin14	Recurrent DDX3X mutations is seen in numerous tumors including Natural killer/T-cell lymphoma (PMID: 26192917) . Mutant DDX3X expression caused broad inhibition of translation (PMID: 27180681, 27058758 ). It also enhances oncogenic KRAS‑induced tumor invasion in colorectal cancer via the β‑catenin/ZEB1 axis (PMID: 27007150).	Expressed in 20 % of 340 reads	42
	20	Uba1	X	20672951	SNV	T	G	NP_001263245.1:p.Phe519Val	NM_001276316.1:c.1555T>G	NM_001276317.1:c.[1555T>G]; NM_001136085.2:c.[1555T>G]; NM_001276316.1:c.[1555T>G]; NM_009457.4:c.[1735T>G]	NP_001263246.1:p.[Phe519Val]; NP_001129557.1:p.[Phe519Val]; NP_001263245.1:p.[Phe519Val]; NP_033483.2:p.[Phe579Val]	43	95.3488	38.6341	No	200	247	1	0.004	1	Uba1	ubiquitin-like modifier activating enzyme 1	A1S9, Sbx, Ube-1, Ube1x		Expressed in 100 % of 400 reads	42
	21	Suco	1	161835114..161835124	Del	GTTGTACAATC	-	NP_766233.2:p.Ile580fs	NM_172645.2:c.1737_1747delGATTGTACAAC	XM_006496765.2:c.[1737_1747delGATTGTACAAC]; XM_006496761.2:c.[1725_1735delGATTGTACAAC]; XM_006496763.2:c.[1704_1714delGATTGTACAAC]; XM_006496762.2:c.[1716_1726delGATTGTACAAC]; XM_017320016.1:c.[1737_1747delGATTGTACAAC]; NM_172645.2:c.[1737_1747delGATTGTACAAC]; XM_006496760.2:c.[1725_1735delGATTGTACAAC]; XM_006496759.2:c.[1737_1747delGATTGTACAAC]	XP_006496828.1:p.[Ile580fs]; XP_006496824.1:p.[Ile576fs]; XP_006496826.1:p.[Ile569fs]; XP_006496825.1:p.[Ile573fs]; XP_017175505.1:p.[Ile580fs]; NP_766233.2:p.[Ile580fs]; XP_006496823.1:p.[Ile576fs]; XP_006496822.1:p.[Ile580fs]	60	41.6667	37.2	No	200	172	0	0	0.892364	Suco	SUN domain containing ossification factor	4732491B11, AI848100, AU016931, Opt			42
	21	Notch1	2	26466601	SNV	A	G	NP_032740.3:p.Leu1668Pro	NM_008714.3:c.5003T>C	NM_008714.3:c.5003T>C	NP_032740.3:p.Leu1668Pro	85	55.2941	37.5532	No	200	238	0	0	1	Notch1	notch 1	9930111A19Rik, lin-12, Mis6, N1, Tan1	Critical for T-cell development but also frequently mutated in T-ALL (PMID: 28115368 ). Mutations either disrupt the negative regulatory region (NRR), an intramolecular lock that protects the extracellular portion of the receptor from cleavage by ADAM10 in the absence of ligand,35,36 or result in truncation of the PEST domain located in the C-terminal portion of NOTCH1 and involved in the termina…		42
	21	Olfr1220	2	89097521	SNV	C	T	NP_667111.2:p.Met135Ile	NM_146900.2:c.405G>A	NM_146900.2:c.405G>A	NP_667111.2:p.Met135Ile	75	42.6667	37.4688	No	200	227	0	0	0.915	Olfr1220	olfactory receptor 1220	MOR2335			42
	21	Zfp770	2	114197175	SNV	C	A	XP_011237766.1:p.Ala138Ser	XM_011239464.2:c.412G>T	XM_011239464.2:c.[412G>T]; NM_175466.4:c.[412G>T]	XP_011237766.1:p.[Ala138Ser]; NP_780675.1:p.[Ala138Ser]	53	47.1698	38.88	No	200	199	0	0	0.005	Zfp770	zinc finger protein 770	6430601A21Rik, Znf770			42
	21	Psma7	2	180036499..180036501	Del	CTT	-	NP_001276405.1:p.Lys173del	NM_001289476.1:c.517_519delAAG	NM_011969.2:c.[727_729delAAG]; NM_001289476.1:c.[517_519delAAG]	NP_036099.1:p.[Lys243del]; NP_001276405.1:p.[Lys173del]	54	35.1852	36.8947	No	200	117	0	0	0.998667	Psma7	proteasome (prosome, macropain) subunit, alpha type 7	C6-I	PSMA7 is overexpressed in colorectal and cervical cancer (PMID: 18202793, 18506748 )		42
	21	Tstd2	4	46135394	Del	T	-	XP_006538024.1:p.Lys53fs	XM_006537961.3:c.158delA	XM_006537962.3:c.[158delA]; XM_006537960.2:c.[158delA]; XM_006537965.3:c.[158delA]; XM_006537963.3:c.[158delA]; XM_006537967.2:c.[-792delA]; XM_006537961.3:c.[158delA]; NM_173033.3:c.[158delA]; XM_006537964.2:c.[158delA]	XP_006538025.1:p.[Lys53fs]; XP_006538023.1:p.[Lys53fs]; XP_006538028.1:p.[Lys53fs]; XP_006538026.1:p.[Lys53fs]; XP_006538024.1:p.[Lys53fs]; NP_766621.3:p.[Lys53fs]; XP_006538027.1:p.[Lys53fs]	104	42.3077	36.25	No	200	208	0	0	1	Tstd2	thiosulfate sulfurtransferase (rhodanese)-like domain containing 2	3010020C06			42
	21	Smc2	4	52469814	SNV	A	G	NP_001288341.1:p.Lys767Arg	NM_001301412.1:c.2300A>G	NM_008017.4:c.[2300A>G]; NM_001301412.1:c.[2300A>G]	NP_032043.3:p.[Lys767Arg]; NP_001288341.1:p.[Lys767Arg]	30	33.3333	39.7	No	200	86	0	0	1	Smc2	structural maintenance of chromosomes 2	5730502P04Rik, AI255214, AW545314, CAP-E, CAPE, Fin16, SMC-2, Smc2l1	Inactivation of SMC2 shows a synergistic lethal response in MYCN-amplified neuroblastoma cells (PMID: 24553121 )		42
	21	Foxp1	6	99015509	SNV	T	C	XP_006505383.1:p.Gln42Arg	XM_006505320.3:c.125A>G	XM_006505313.3:c.[515A>G]; XM_006505315.3:c.[515A>G]; XM_006505324.3:c.[515A>G]; XM_006505311.3:c.[515A>G]; XM_006505310.3:c.[515A>G]; XM_017321305.1:c.[125A>G]; XM_006505316.3:c.[512A>G]; XM_006505314.3:c.[512A>G]; XM_017321306.1:c.[125A>G]; NM_001197321.1:c.[416A>G]; XM_006505317.3:c.[512A>G]; XM_006505320.3:c.[125A>G]; XM_006505322.1:c.[122A>G]; XM_017321303.1:c.[515A>G]; XM_006505321.1:c.[125…	XP_006505376.1:p.[Gln172Arg]; XP_006505378.1:p.[Gln172Arg]; XP_006505387.1:p.[Gln172Arg]; XP_006505374.1:p.[Gln172Arg]; XP_006505373.1:p.[Gln172Arg]; XP_017176794.1:p.[Gln42Arg]; XP_006505379.1:p.[Gln171Arg]; XP_006505377.1:p.[Gln171Arg]; XP_017176795.1:p.[Gln42Arg]; NP_001184250.1:p.[Gln139Arg]; XP_006505380.1:p.[Gln171Arg]; XP_006505383.1:p.[Gln42Arg]; XP_006505385.1:p.[Gln41Arg]; XP_017176792.…	61	44.2623	37.2593	No	200	134	0	0	1	Foxp1	forkhead box P1	3110052D19Rik, 4932443N09Rik, AI461938, AW494214	Foxp1 is critical for early B cell development and loss causes disruption in developing and mature B cells results in reduced numbers and frequencies of follicular and B-1 B cells (PMID: 29507226 ). FOXP1 is also expressed in embryonic neural stem cells and required for neuronal differentiation. FOXP1 repress the Notch pathway including the Notch-ligand Jagged1, resulting in inhibition of Notch s…		42
	21	Olfr507	7	108622304	SNV	T	C	NP_666954.1:p.Leu164Pro	NM_146743.1:c.491T>C	NM_146743.1:c.491T>C	NP_666954.1:p.Leu164Pro	93	46.2366	38.1628	No	200	290	0	0	0	Olfr507	olfactory receptor 507	MOR204-7			42
	21	Lhpp	7	132705647	SNV	G	T	NP_083885.1:p.Ala258Ser	NM_029609.1:c.772G>T	NM_029609.1:c.[772G>T]; XM_006508297.1:c.[430G>T]; XM_006508298.3:c.[430G>T]	NP_083885.1:p.[Ala258Ser]; XP_006508360.1:p.[Ala144Ser]; XP_006508361.1:p.[Ala144Ser]	57	45.614	38	No	200	133	0	0	0.888	Lhpp	phospholysine phosphohistidine inorganic pyrophosphate phosphatase	2310007H09Rik	Is a histidine phosphatase that been suggested to function as a tumor suppressor gene (PMID: 29562234 )		42
	21	Nadsyn1	7	143797934	SNV	G	A	NP_084497.1:p.Thr654Ile	NM_030221.2:c.1961C>T	NM_030221.2:c.[1961C>T]; XM_017312402.1:c.[1223C>T]; XM_011242021.2:c.[1700C>T]; XM_017312401.1:c.[1619C>T]; NM_001308095.1:c.[1223C>T]	NP_084497.1:p.[Thr654Ile]; XP_017167891.1:p.[Thr408Ile]; XP_011240323.1:p.[Thr567Ile]; XP_017167890.1:p.[Thr540Ile]; NP_001295024.1:p.[Thr408Ile]	98	54.0816	38.2075	No	200	255	0	0	1	Nadsyn1	NAD synthetase 1	9130012B15Rik			42
	21	Hcn4	9	58860665	SNV	G	C	NP_001074661.1:p.Ala1170Pro	NM_001081192.1:c.3508G>C	NM_001081192.1:c.3508G>C	NP_001074661.1:p.Ala1170Pro	39	43.5897	38.2353	No	200	121	1	0.0083	0.067	Hcn4	hyperpolarization-activated, cyclic nucleotide-gated K+ 4	Bcng3, Hcn3			42
	21	Dcbld1	10	52319488	SNV	C	T	NP_079981.2:p.Pro335Leu	NM_025705.3:c.1004C>T	XM_006512820.3:c.[791C>T]; XM_011243196.1:c.[884C>T]; NM_025705.3:c.[1004C>T]; XM_006512821.1:c.[326C>T]	XP_006512883.1:p.[Pro264Leu]; XP_011241498.1:p.[Pro295Leu]; NP_079981.2:p.[Pro335Leu]; XP_006512884.1:p.[Pro109Leu]	59	49.1525	38.6552	No	200	171	1	0.0058	1	Dcbld1	discoidin, CUB and LCCL domain containing 1	4631413K11Rik			42
	21	Utp18	11	93876078	SNV	C	A	NP_001013393.1:p.Asp268Tyr	NM_001013375.1:c.802G>T	NM_001013375.1:c.[802G>T]; XM_017314477.1:c.[802G>T]	NP_001013393.1:p.[Asp268Tyr]; XP_017169966.1:p.[Asp268Tyr]	74	51.3514	38.2632	No	200	188	1	0.0053	0.999	Utp18	UTP18 small subunit processome component	6230425C22Rik, 6430513M13, Wdr50			42
	21	Abcc3	11	94363449	SNV	G	T	XP_006534491.1:p.Thr741Lys	XM_006534428.3:c.2222C>A	NM_029600.3:c.[2222C>A]; XM_006534428.3:c.[2222C>A]	NP_083876.3:p.[Thr741Lys]; XP_006534491.1:p.[Thr741Lys]	37	21.6216	38.875	No	200	85	0	0	1	Abcc3	ATP-binding cassette, sub-family C (CFTR/MRP), member 3	1700019L09Rik, ABC31, MLP2, MOAT-D, MRP3			42
	21	Abca8a	11	110036496	SNV	C	T	XP_006533125.1:p.Gly1343Arg	XM_006533062.3:c.4027G>A	XM_006533063.2:c.[4027G>A]; NM_153145.4:c.[4027G>A]; XM_017314485.1:c.[2680G>A]; XM_006533062.3:c.[4027G>A]; XM_006533061.2:c.[4027G>A]	XP_006533126.1:p.[Gly1343Arg]; NP_694785.3:p.[Gly1343Arg]; XP_017169974.1:p.[Gly894Arg]; XP_006533125.1:p.[Gly1343Arg]; XP_006533124.2:p.[Gly1343Arg]	105	46.6667	38.3673	No	200	236	0	0	0.998	Abca8a	ATP-binding cassette, sub-family A (ABC1), member 8a				42
	21	B3galnt2	13	13998377..13998398	Del	AGGACAACAGAAGTTCTGACAC	-		XM_006516818.3:c.*1344_*1365delAGGACAACAGAAGTTCTGACAC	NM_178640.2:c.[*1344_*1365delAGGACAACAGAAGTTCTGACAC]; XM_006516775.2:c.[685_706delGTGTCAGAACTTCTGTTGTCCT]; NM_178337.3:c.[1447_1468delGTGTCAGAACTTCTGTTGTCCT]; XM_017315601.1:c.[685_706delGTGTCAGAACTTCTGTTGTCCT]; XM_006516773.3:c.[1261_1282delGTGTCAGAACTTCTGTTGTCCT]; XM_006516818.3:c.[*1344_*1365delAGGACAACAGAAGTTCTGACAC]	XP_006516838.1:p.[Val229fs]; NP_848027.1:p.[Val483fs]; XP_017171090.1:p.[Val229fs]; XP_006516836.1:p.[Val421fs]	46	32.6087	36.6667	No	200	206	0	0	0.847045	B3galnt2	UDP-GalNAc:betaGlcNAc beta 1,3-galactosaminyltransferase, polypeptide 2	A930105D20Rik, C80633, D230016N13Rik, 2610206D02Rik, C530005D02Rik, pmn			42
	21	Fmnl3	15	99328147	SNV	G	A	NP_035841.1:p.Arg209Cys	NM_011711.2:c.625C>T	XM_006520844.3:c.[472C>T]; NM_001310623.1:c.[472C>T]; NM_001310622.1:c.[625C>T]; XM_006520846.2:c.[-78C>T]; NM_011711.2:c.[625C>T]	XP_006520907.1:p.[Arg158Cys]; NP_001297552.1:p.[Arg158Cys]; NP_001297551.1:p.[Arg209Cys]; NP_035841.1:p.[Arg209Cys]	97	39.1753	37.7105	No	200	149	0	0	1	Fmnl3	formin-like 3	2700073B04Rik, FBP11, mKIAA2014, Wbp3	Formin-like 3 (FMNL3), a member of diaphanous-related formins subfamily, plays an important role in cytoskeleton reorganization, cell adhesion and cancer cell invasion in vitro (PMID: 25758200)		42
	21	Lvrn	18	46880627	Del	T	-	XP_017173486.1:p.Phe461fs	XM_017317997.1:c.1375delT	XM_017317998.1:c.[613delT]; XM_017318000.1:c.[244delT]; NM_029008.1:c.[1375delT]; XM_017317997.1:c.[1375delT]; XM_017317999.1:c.[244delT]	XP_017173487.1:p.[Phe207fs]; XP_017173489.1:p.[Phe84fs]; NP_083284.1:p.[Phe461fs]; XP_017173486.1:p.[Phe461fs]; XP_017173488.1:p.[Phe84fs]	89	50.5618	35.2889	No	200	230	1	0.0043	0.986	Lvrn	laeverin	4833403I15Rik, APQ, Aqpep			42
	21	Pten	19	32758480^32758481	Ins	-	A	NP_032986.1:p.Arg14fs	NM_008960.2:c.36_37insA	NM_008960.2:c.36_37insA	NP_032986.1:p.Arg14fs	93	96.7742	37.5333	No	200	197	0	0		Pten	phosphatase and tensin homolog	2310035O07Rik, A130070J02Rik, AI463227, B430203M17Rik, MMAC1, TEP1	Mutation in the tumor suppressor gene PTEN, a negative regulator of PI3K signalling is common in varioius cancer form.This frameshift will likely cause loss-of-function of this PTEN allele.		42
	21	Uba1	X	20681153	SNV	A	T	NP_001263245.1:p.Asn867Tyr	NM_001276316.1:c.2599A>T	NM_001276317.1:c.[2599A>T]; NM_001276316.1:c.[2599A>T]; NM_009457.4:c.[2779A>T]; NM_001136085.2:c.[2599A>T]	NP_001263246.1:p.[Asn867Tyr]; NP_001263245.1:p.[Asn867Tyr]; NP_033483.2:p.[Asn927Tyr]; NP_001129557.1:p.[Asn867Tyr]	46	91.3043	37.6905	No	200	232	0	0	1	Uba1	ubiquitin-like modifier activating enzyme 1	A1S9, Sbx, Ube-1, Ube1x			42
	22	Ugt1a10	1	88218255	Del	C	-	NP_659545.2:p.His477fs	NM_145079.3:c.1427delC	NM_201641.2:c.[1424delC]; NM_013701.3:c.[1433delC]; NM_145079.3:c.[1427delC]; NM_201644.2:c.[1418delC]; NM_201643.2:c.[1421delC]; NM_201645.2:c.[1439delC]; NM_201410.3:c.[1427delC]; NM_201642.4:c.[1427delC]	NP_964003.2:p.[His476fs]; NP_038729.1:p.[His479fs]; NP_659545.2:p.[His477fs]; NP_964006.2:p.[His474fs]; NP_964005.2:p.[His475fs]; NP_964007.2:p.[His481fs]; NP_958812.3:p.[His477fs]; NP_964004.1:p.[His477fs]	200	16.5	35.0909	Yes	200	497	0	0	1	Ugt1a10	UDP glycosyltransferase 1 family	A13, Ugt1a13, mUGTBr/P, UDPGT, UDPGT 1-9, UGT1-09, UGT1.9, Ugt1a12, UGTP4, A10', Ugt1a10, A9', Ugt1a9, UDPGT 1-6, UGT1-06, UGT1.6, Ugt1a6, Ugt1a7, UDPGT 1-2, Ugt1, Gnt1, UDPGT 1-1, Udpgt-1a, UGT1A01, UgtBr1		Not expressed among 8 reads	42
	22	Mroh2a	1	88237491	SNV	C	T	NP_001268395.1:p.Arg445*	NM_001281466.1:c.1333C>T	NM_001281466.1:c.[1333C>T]; XM_006529040.2:c.[1333C>T]; XM_006529044.3:c.[676C>T]; XM_006529042.3:c.[1333C>T]; XM_006529048.3:c.[1333C>T]; XM_006529041.2:c.[1333C>T]; XM_006529049.3:c.[1333C>T]; XM_006529043.2:c.[1333C>T]	NP_001268395.1:p.[Arg445*]; XP_006529103.1:p.[Arg445*]; XP_006529107.1:p.[Arg226*]; XP_006529105.1:p.[Arg445*]; XP_006529111.1:p.[Arg445*]; XP_006529104.1:p.[Arg445*]; XP_006529112.1:p.[Arg445*]; XP_006529106.1:p.[Arg445*]	62	22.5806	37.7857	No	200	171	0	0	0.596	Mroh2a	maestro heat-like repeat family member 2A	ENSMUSG00000044873, Heatr7b1, OTTMUSG00000020804		Gene not expressed	42
	22	Hjurp	1	88277245	SNV	C	G	NP_941054.2:p.Arg46Thr	NM_198652.2:c.137G>C	XM_006529721.3:c.[137G>C]; XM_006529720.3:c.[137G>C]; XM_006529722.3:c.[-145G>C]; NM_198652.2:c.[137G>C]	XP_006529784.1:p.[Arg46Thr]; XP_006529783.1:p.[Arg46Thr]; NP_941054.2:p.[Arg46Thr]	105	18.0952	37.5789	No	200	249	1	0.004	0.884	Hjurp	Holliday junction recognition protein	6430706D22Rik, A730008H23Rik, C330011F01Rik, Gm975, Mfleg1		Expressed in 13% of 118 reads	42
	22	Gm4788	1	139754367	Del	A	-	NP_001025148.3:p.Ser164fs	NM_001029977.3:c.490delT	NM_001160303.1:c.[490delT]; NM_001160304.1:c.[490delT]; NM_001029977.3:c.[490delT]	NP_001153775.1:p.[Ser164fs]; NP_001153776.1:p.[Ser164fs]; NP_001025148.3:p.[Ser164fs]	84	58.3333	35.7143	Yes	200	205	0	0	0.988	Gm4788	predicted gene 4788	Cfhrc, EG214403		Gene not expressed	42
	22	Psd4	2	24403327	SNV	C	T	XP_006497897.1:p.Arg735Trp	XM_006497834.3:c.2203C>T	XM_006497831.3:c.[2203C>T]; XM_011239049.2:c.[2203C>T]; XM_006497836.3:c.[2203C>T]; XM_006497833.3:c.[2203C>T]; XM_017317067.1:c.[2203C>T]; NM_177611.3:c.[2203C>T]; XM_006497834.3:c.[2203C>T]; XM_006497835.3:c.[2203C>T]; XM_006497832.3:c.[2203C>T]	XP_006497894.1:p.[Arg735Trp]; XP_011237351.1:p.[Arg735Trp]; XP_006497899.1:p.[Arg735Trp]; XP_006497896.1:p.[Arg735Trp]; XP_017172556.1:p.[Arg735Trp]; NP_808279.1:p.[Arg735Trp]; XP_006497897.1:p.[Arg735Trp]; XP_006497898.1:p.[Arg735Trp]; XP_006497895.1:p.[Arg735Trp]	59	49.1525	38.8621	No	200	150	0	0	0.985	Psd4	pleckstrin and Sec7 domain containing 4	BC046518, EFA6B		Expressed in 48% of 94 reads	42
	22	Notch1	2	26460279^26460280	Ins	-	C	NP_032740.3:p.Ala2283fs	NM_008714.3:c.6847_6848insG	NM_008714.3:c.6847_6848insG	NP_032740.3:p.Ala2283fs	32	43.75	38.7857	Yes	200	66	0	0		Notch1	notch 1	9930111A19Rik, lin-12, Mis6, N1, Tan1	Critical for T-cell development but also frequently mutated in T-ALL (PMID: 28115368 ). Mutations either disrupt the negative regulatory region (NRR), an intramolecular lock that protects the extracellular portion of the receptor from cleavage by ADAM10 in the absence of ligand,35,36 or result in truncation of the PEST domain located in the C-terminal portion of NOTCH1 and involved in the termina…	Expressed in 47% of 601 reads	42
	22	Olfr267	4	58785176	SNV	G	A	NP_667131.2:p.Ala182Val	NM_146920.2:c.545C>T	NM_146920.2:c.545C>T	NP_667131.2:p.Ala182Val	76	40.7895	38.1613	No	200	211	0	0	0.755	Olfr267	olfactory receptor 267	MOR262-1		Gene not expressed	42
	22	Kctd8	5	69110537	SNV	C	T	NP_780728.3:p.Arg410His	NM_175519.5:c.1229G>A	NM_175519.5:c.1229G>A	NP_780728.3:p.Arg410His	93	38.7097	37.3333	No	200	222	0	0	1	Kctd8	potassium channel tetramerisation domain containing 8	A730087N02Rik		Gene not expressed	42
	22	Ezh2	6	47530580..47530581	Del	CA	-	XP_006505590.1:p.Leu502fs	XM_006505527.1:c.1505_1506delTG	XM_006505524.1:c.[2090_2091delTG]; XM_006505526.3:c.[2216_2217delTG]; XM_006505523.1:c.[2174_2175delTG]; XM_006505520.3:c.[2216_2217delTG]; XM_006505528.1:c.[1505_1506delTG]; XM_006505525.1:c.[2048_2049delTG]; NM_001146689.1:c.[2189_2190delTG]; XM_006505521.2:c.[2216_2217delTG]; XM_006505527.1:c.[1505_1506delTG]; NM_007971.2:c.[2201_2202delTG]; XM_006505529.1:c.[1490_1491delTG]	XP_006505587.1:p.[Leu697fs]; XP_006505589.1:p.[Leu739fs]; XP_006505586.1:p.[Leu725fs]; XP_006505583.1:p.[Leu739fs]; XP_006505591.1:p.[Leu502fs]; XP_006505588.1:p.[Leu683fs]; NP_001140161.1:p.[Leu730fs]; XP_006505584.1:p.[Leu739fs]; XP_006505590.1:p.[Leu502fs]; NP_031997.2:p.[Leu734fs]; XP_006505592.1:p.[Leu497fs]	71	97.1831	35.7971	No	200	187	0	0	0.996	Ezh2	enhancer of zeste 2 polycomb repressive complex 2 subunit	Enx-1, Enx1h, KMT6, mKIAA4065	Enhancer of zeste homolog 2 (EZH2), a histone methyltransferase and a catalytic component of PRC2, catalyzes tri-methylation of histone H3 at Lys 27 (H3K27me3) to regulate gene expression through epigenetic machinery. EZH2 promotes cell survival, proliferation, epithelial to mesenchymal, invasion, and drug resistance of cancer cells (PMID: 29556394 ). Variant is located in the post-SET domain.	Expressed in100% of 430 reads	42
	22	Vmn2r32	7	7476778	SNV	T	C	NP_001098533.1:p.Asn132Ser	NM_001105063.1:c.395A>G	NM_001105063.1:c.[395A>G]; XM_017322130.1:c.[395A>G]	NP_001098533.1:p.[Asn132Ser]; XP_017177619.1:p.[Asn132Ser]	128	35.1562	38.7333	No	200	349	0	0	0.591	Vmn2r32	vomeronasal 2, receptor 32	V2r5		Gene not expressed	42
	22	Olfr577	7	102973309	SNV	C	T	NP_667320.1:p.Val228Ile	NM_147109.1:c.682G>A	NM_147109.1:c.682G>A	NP_667320.1:p.Val228Ile	77	58.4416	37.8	No	200	221	1	0.0045	0.271	Olfr577	olfactory receptor 577	MOR7-2		Gene not expressed	42
	22	Olfr617	7	103584436	SNV	A	C	NP_667052.1:p.Tyr138Ser	NM_146841.1:c.413A>C	NM_146841.1:c.413A>C	NP_667052.1:p.Tyr138Ser	218	31.1927	37.9412	No	200	853	0	0	0.952	Olfr617	olfactory receptor 617	MOR31-10		Gene not expressed	42
	22	Abca16	7	120433594	SNV	C	T	XP_006507746.1:p.Arg279Trp	XM_006507683.2:c.835C>T	NM_001278943.1:c.[-104C>T]; NM_001278944.1:c.[-478C>T]; XM_006507683.2:c.[835C>T]	XP_006507746.1:p.Arg279Trp	16	56.25	36.7778	No	200	43	1	0.0232	0.096	Abca16	ATP-binding cassette, sub-family A (ABC1), member 16	AY243472		Gene not expressed	42
	22	Fam160a2	7	105389406..105389407	Del	GT	-	XP_006508314.1:p.Arg209fs	XM_006508251.3:c.624_625delAC	NM_199009.3:c.[624_625delAC]; NM_001242365.2:c.[624_625delAC]; XM_006508252.3:c.[-512_-511delAC]; NM_001242363.2:c.[624_625delAC]; XM_006508251.3:c.[624_625delAC]; NM_001242364.2:c.[624_625delAC]	NP_950174.1:p.[Arg209fs]; NP_001229294.1:p.[Arg209fs]; NP_001229292.1:p.[Arg209fs]; XP_006508314.1:p.[Arg209fs]; NP_001229293.1:p.[Arg209fs]	44	38.6364	33.5882	No	200	112	0	0	0.9985	Fam160a2	family with sequence similarity 160, member A2	4632419K20Rik, 6530415H11Rik, FHIP		Expressed in 41% of 22 reads	42
	22	Cherp	8	72467912..72467914	Del	TGC	-	XP_006509748.1:p.Gln353del	XM_006509685.3:c.1038_1040delGCA	NM_138585.3:c.[1005_1007delGCA]; XM_006509685.3:c.[1038_1040delGCA]	NP_613051.3:p.[Gln342del]; XP_006509748.1:p.[Gln353del]	24	20.8333	32.8	No	200	70	0	0	0.999	Cherp	calcium homeostasis endoplasmic reticulum protein	5730408I11Rik, D8Wsu96e, DAN16, Scaf6		Expressed in 40% of 48 reads	42
	22	Polr2a	11	69743339	SNV	G	A	NP_001277997.1:p.Ser755Phe	NM_001291068.1:c.2264C>T	NM_001291068.1:c.2264C>T	NP_001277997.1:p.Ser755Phe	68	42.6471	37.5172	No	200	243	0	0	1	Polr2a	polymerase (RNA) II (DNA directed) polypeptide A	220kDa, Rpb1, Rpo2-1		Expressed in 45% of 137 reads	42
	22	Eml5	12	98858886	SNV	G	A	NP_001074660.1:p.Arg691*	NM_001081191.1:c.2071C>T	XM_017315107.1:c.[2071C>T]; NM_001081191.1:c.[2071C>T]; XM_017315105.1:c.[2071C>T]; XM_006515972.3:c.[2071C>T]; XM_017315106.1:c.[2071C>T]; XM_006515970.3:c.[2071C>T]	XP_017170596.1:p.[Arg691*]; NP_001074660.1:p.[Arg691*]; XP_017170594.1:p.[Arg691*]; XP_006516035.1:p.[Arg691*]; XP_017170595.1:p.[Arg691*]; XP_006516033.1:p.[Arg691*]	80	42.5	37.8235	No	200	236	1	0.0042	1	Eml5	echinoderm microtubule associated protein like 5	BC027154, C130068M19Rik		Expressed in 36% of 11 reads	42
	22	Ccnk	12	108189131..108189133	Del	ATC	-	XP_006515508.1:p.Ile117del	XM_006515445.2:c.346_348delATC	XM_006515443.3:c.[346_348delATC]; XM_006515444.3:c.[346_348delATC]; NM_009832.2:c.[346_348delATC]; XM_006515445.2:c.[346_348delATC]	XP_006515506.1:p.[Ile117del]; XP_006515507.1:p.[Ile117del]; NP_033962.2:p.[Ile117del]; XP_006515508.1:p.[Ile117del]	71	40.8451	36.3448	No	200	176	0	0	1	Ccnk	cyclin K	AW123198, AW413594, CPR4, CycK		Expressed in 50% of 105 reads	42
	22	Igh, Ighj3	12	113429128..113429129	MNV	CC	AT	Ighj3:p.Trp1Tyr	Ighj3:c.2_3delGGinsAT	Ighj3:c.2_3delGGinsAT	Ighj3:p.Trp1Tyr	14	71.4286	37.4211	No	200	168	0	0	0.001	Igh, Ighj3	immunoglobulin heavy chain complex, immunoglobulin heavy joining 3	Gm16843		No coverage	42
	22	Zfp808	13	62173194	SNV	C	G	XP_017171048.1:p.Gln714Glu	XM_017315559.1:c.2140C>G	XM_017315559.1:c.[2140C>G]; NM_001039239.2:c.[2236C>G]; XM_017315558.1:c.[2166-14C>G]	XP_017171048.1:p.[Gln714Glu]; NP_001034328.2:p.[Gln746Glu]	13	23.0769	37.6667	No	80.057	44	0	0	0.038	Zfp808	zinc finger protein 80	EG630579, Gm7036		Not expressed among 4 reads	42
	22	Rac2	15	78572612	SNV	C	T	NP_033034.1:p.Gly12Arg	NM_009008.3:c.34G>A	NM_009008.3:c.34G>A	NP_033034.1:p.Gly12Arg	76	28.9474	38.1364	No	200	109	0	0	1	Rac2	RAS-related C3 botulinum substrate 2	AI323801, AI452260	The small guanosine triphosphotases (GTPases) Rho proteins are members of the Ras-like superfamily. While most Rho GTPases are expressed widely, the expression of Rac2 is restricted to hematopoietic cells (PMID: 23850828). Mutation in position G12R equivalent to the activating site in Ras and Rac1.	Expressed in 32% of 2146 reads	42
	22	Umps	16	33962195	SNV	C	A		XM_006522008.3:c.-179G>T	NM_009471.2:c.[356G>T]; XM_006522008.3:c.[-179G>T]	NP_033497.1:p.Cys119Phe	30	36.6667	37.1818	No	200	112	0	0	1	Umps	uridine monophosphate synthetase	1700095D23Rik, AA408257, AL033308, BB164745		Expressed in 56% of 149 reads	42
	22	Sh3gl1	17	56019426	SNV	A	G	XP_011244635.1:p.Val39Ala	XM_011246333.1:c.116T>C	NM_013664.3:c.[221T>C]; NM_001252471.1:c.[221T>C]; XM_011246333.1:c.[116T>C]	NP_038692.1:p.[Val74Ala]; NP_001239400.1:p.[Val74Ala]; XP_011244635.1:p.[Val39Ala]	34	44.1176	38.6	No	200	105	0	0	1	Sh3gl1	SH3-domain GRB2-like 1	C77078, EEN, Sh3d2b, SH3P8		Expressed in 47% of 113 reads	42
	22	Lama1	17	67799013	SNV	T	A	NP_032506.2:p.Met2081Lys	NM_008480.2:c.6242T>A	XM_006523717.3:c.[6242T>A]; NM_008480.2:c.[6242T>A]	XP_006523780.1:p.[Met2081Lys]; NP_032506.2:p.[Met2081Lys]	48	58.3333	37	No	200	136	1	0.0074	0.959	Lama1	laminin, alpha 1	AA408497, Lama		Gene not expressed	42
	22	Nxf3	X	136079220	SNV	T	A	XP_017173987.1:p.Glu166Asp	XM_017318498.1:c.498A>T	XM_017318498.1:c.[498A>T]; XM_011247740.1:c.[498A>T]; XM_006528536.3:c.[537A>T]; XM_011247739.1:c.[519A>T]; XM_006528534.2:c.[498A>T]; XM_006528531.2:c.[519A>T]; NM_001024141.4:c.[508-124A>T]; XM_006528532.2:c.[498A>T]	XP_017173987.1:p.[Glu166Asp]; XP_011246042.1:p.[Glu166Asp]; XP_006528599.1:p.[Glu179Asp]; XP_011246041.1:p.[Glu173Asp]; XP_006528597.2:p.[Glu166Asp]; XP_006528594.2:p.[Glu173Asp]; XP_006528595.2:p.[Glu166Asp]	18	66.6667	38.75	No	200	51	0	0	0.013	Nxf3	nuclear RNA export factor 3	Gm384		Gene not expressed	42
	23	Epb41l5	1	119549916^119549917	Ins	-	G	XP_006529461.1:p.Ala701fs	XM_006529398.1:c.2099_2100insC	XM_006529399.3:c.[2096_2097insC]; NM_145506.4:c.[2099_2100insC]; XM_006529397.1:c.[2099_2100insC]; XM_006529398.1:c.[2099_2100insC]	XP_006529462.1:p.[Ala700fs]; NP_663481.2:p.[Ala701fs]; XP_006529460.1:p.[Ala701fs]; XP_006529461.1:p.[Ala701fs]	78	41.0256	37.8125	Yes	200	193	0	0		Epb41l5	erythrocyte membrane protein band 4.1 like 5	1700030C16Rik, AL022914, BE37, E230025E14Rik, Epb4.1l5, Lulu1, NBL5	EPB41L5 is induced by ZEB1 and associated with EMT (PMID: 27617643)	Gene not expressed	47
	23	Notch1	2	26460159	Del	C	-	NP_032740.3:p.Gly2323fs	NM_008714.3:c.6968delG	NM_008714.3:c.6968delG	NP_032740.3:p.Gly2323fs	44	47.7273	34.6667	Yes	200	106	0	0	0.468	Notch1	notch 1	9930111A19Rik, lin-12, Mis6, N1, Tan1	Critical for T-cell development but also frequently mutated in T-ALL (PMID: 28115368 ). Mutations either disrupt the negative regulatory region (NRR), an intramolecular lock that protects the extracellular portion of the receptor from cleavage by ADAM10 in the absence of ligand,35,36 or result in truncation of the PEST domain located in the C-terminal portion of NOTCH1 and involved in the termina…	Expressed in 50 % of 1000 reads	47
	23	Notch1	2	26466601	SNV	A	G	NP_032740.3:p.Leu1668Pro	NM_008714.3:c.5003T>C	NM_008714.3:c.5003T>C	NP_032740.3:p.Leu1668Pro	87	42.5287	38.8108	No	200	238	0	0	1	Notch1	notch 1	9930111A19Rik, lin-12, Mis6, N1, Tan1	Critical for T-cell development but also frequently mutated in T-ALL (PMID: 28115368 ). Mutations either disrupt the negative regulatory region (NRR), an intramolecular lock that protects the extracellular portion of the receptor from cleavage by ADAM10 in the absence of ligand,35,36 or result in truncation of the PEST domain located in the C-terminal portion of NOTCH1 and involved in the termina…	Expressed in 50 % of 500 reads	47
	23	Olfr1280, Olfr1281	2	111328937	SNV	G	C	NP_001005568.1:p.Val173Leu	NM_001005568.1:c.517G>C	NM_001005568.1:c.517G>C	NP_001005568.1:p.Val173Leu	225	43.1111	38.1237	No	200	675	0	0	0	Olfr1280, Olfr1281	olfactory receptor 1280, olfactory receptor 1281	MOR248-1, MOR248-14P, MOR248-18		Gene not expressed	47
	23	Notch1	2	26460073^26460074	Ins	-	CAGAG	NP_032740.3:p.Ile2352fs	NM_008714.3:c.7053_7054insCTCTG	NM_008714.3:c.7053_7054insCTCTG	NP_032740.3:p.Ile2352fs	57	33.3333	38.8242	No	200	118	0	0		Notch1	notch 1	9930111A19Rik, lin-12, Mis6, N1, Tan1	Critical for T-cell development but also frequently mutated in T-ALL (PMID: 28115368 ). Mutations either disrupt the negative regulatory region (NRR), an intramolecular lock that protects the extracellular portion of the receptor from cleavage by ADAM10 in the absence of ligand,35,36 or result in truncation of the PEST domain located in the C-terminal portion of NOTCH1 and involved in the termina…	Expressed in 50 % of 900 reads	47
	23	Nudc	4	26623890	SNV	T	C	NP_035078.1:p.Asp41Gly	NM_010948.3:c.122A>G	NM_010948.3:c.122A>G	NP_035078.1:p.Asp41Gly	47	46.8085	38.3182	No	200	100	0	0	1	Nudc	nudC nuclear distribution protein	SIG-92, Silg92		Gene not expressed	47
	23	Slc35e2, Gm16023	4	155610200	SNV	T	G	XP_006539016.1:p.Leu68Arg	XM_006538953.3:c.203T>G	XM_006538953.3:c.[203T>G]; NM_177186.4:c.[203T>G]; XM_006538952.3:c.[203T>G]	XP_006539016.1:p.[Leu68Arg]; NP_796160.1:p.[Leu68Arg]; XP_006539015.1:p.[Leu68Arg]	98	51.0204	37.42	No	200	232	0	0	1	Slc35e2, Gm16023	solute carrier family 35, member E2, predicted gene 16023	A530082C11Rik, AI957035, OTTMUSG00000029160		Expressed in 70% of 18 reads	47
	23	Igk, Igkv4-73	6	69197876	SNV	C	G	Igkv4-73:p.Gly22Ala	Igkv4-73:c.65G>C	Igkv4-73:c.65G>C	Igkv4-73:p.Gly22Ala	101	43.5644	38.4545	No	200	312	0	0	0.001	Igk, Igkv4-73	immunoglobulin kappa chain complex, immunoglobulin kappa variable 4-73	kappa, ah4, EG628516, Gm6889		Gene not expressed	47
	23	Il4ra	7	125571452	SNV	A	G	NP_001008700.1:p.Thr179Ala	NM_001008700.3:c.535A>G	XM_006507388.1:c.[-249A>G]; NM_001008700.3:c.[535A>G]	NP_001008700.1:p.Thr179Ala	87	32.1839	38.3929	No	200	194	1	0.0052	0.997	Il4ra	interleukin 4 receptor, alpha	CD124, Il4r	Normally are early thymic progenitors expressing heteroreceptor (comprised of IL-4Ralpha & IL-13Ralpha1) exhibit STAT6 activation seen together with Notch1 downregulation (PMID: 28893952), leading to inhibition of T cell lineage maturation	Expressed in 17% of 30 reads	47
	23	Fcgbp, Gm21925	7	28117516^28117517	Ins	-	TCG	NP_001116075.1:p.Val2469_Ser2470insVal	NM_001122603.1:c.7402_7403insTCG	NM_001122603.1:c.7402_7403insTCG	NP_001116075.1:p.Val2469_Ser2470insVal	84	41.6667	38.0481	No	200	194	0	0		Fcgbp, Gm21925	Fc fragment of IgG binding protein, predicted gene, 21925	A430096B05Rik		Gene not expressed	47
	23	Fat3	9	16375201	SNV	C	A	XP_011240846.1:p.Asp1014Tyr	XM_011242544.1:c.3040G>T	XM_011242544.1:c.[3040G>T]; XM_017313398.1:c.[3040G>T]; XM_006510372.3:c.[3040G>T]; XM_011242543.2:c.[3040G>T]; NM_001080814.1:c.[3025G>T]; XM_011242541.2:c.[3040G>T]; XM_011242542.2:c.[3040G>T]; XM_006510373.3:c.[3040G>T]	XP_011240846.1:p.[Asp1014Tyr]; XP_017168887.1:p.[Asp1014Tyr]; XP_006510435.1:p.[Asp1014Tyr]; XP_011240845.1:p.[Asp1014Tyr]; NP_001074283.1:p.[Asp1009Tyr]; XP_011240843.1:p.[Asp1014Tyr]; XP_011240844.1:p.[Asp1014Tyr]; XP_006510436.1:p.[Asp1014Tyr]	78	46.1538	38	No	200	217	0	0	1	Fat3	FAT atypical cadherin 3	9430076A06Rik, D430038H04Rik, Gm1132, Gm510, MFAT3F	FAT3 is an atypical cadhering that may act as a receptor for the Hippo pathway. Recurrent mutations of FAT3 has been seen in liposarcoma (PMID: 26643872), Breast and Ovarian Cancer (PMID: 27213343), Chronic Lymphocytic Leukemia (PMID: 27060156) and esophageal squamous cell carcinoma (PMID: 25151357)	Gene not expressed	47
	23	Dmxl2	9	54473875	Del	A	-	XP_006511146.2:p.Leu109fs	XM_006511083.3:c.326delT	NM_172771.2:c.[326delT]; XM_006511083.3:c.[326delT]; XM_006511085.3:c.[326delT]; XM_006511084.3:c.[326delT]	NP_766359.2:p.[Leu109fs]; XP_006511146.2:p.[Leu109fs]; XP_006511148.2:p.[Leu109fs]; XP_006511147.2:p.[Leu109fs]	84	52.381	37.75	Yes	200	182	0	0	1	Dmxl2	Dmx-like 2	6330586A12, 6430411K14Rik, E130119P06Rik, mKIAA0856	DMXL2 is a novel regulator of Notch signalling (PMID: 20810660) that drives EMT in hormonal theraphy resitant breast cancer (PMID: 26093085)	Gene not expressed	47
	23	Grik2	10	49404429	SNV	T	A	XP_011241425.1:p.Ser409Cys	XM_011243123.2:c.1225A>T	XM_011243125.2:c.[1225A>T]; XM_011243124.2:c.[1225A>T]; XM_006512545.3:c.[1225A>T]; XM_011243121.2:c.[1225A>T]; XM_011243120.2:c.[1225A>T]; XM_011243122.2:c.[1225A>T]; NM_001111268.1:c.[1225A>T]; XM_011243123.2:c.[1225A>T]; XM_011243127.2:c.[1225A>T]; XM_017313804.1:c.[1225A>T]; NM_010349.2:c.[1225A>T]	XP_011241427.1:p.[Ser409Cys]; XP_011241426.1:p.[Ser409Cys]; XP_006512608.1:p.[Ser409Cys]; XP_011241423.1:p.[Ser409Cys]; XP_011241422.1:p.[Ser409Cys]; XP_011241424.1:p.[Ser409Cys]; NP_001104738.1:p.[Ser409Cys]; XP_011241425.1:p.[Ser409Cys]; XP_011241429.1:p.[Ser409Cys]; XP_017169293.1:p.[Ser409Cys]; NP_034479.2:p.[Ser409Cys]	65	40	39.2692	No	200	223	0	0	1	Grik2	glutamate receptor, ionotropic, kainate 2 (beta 2)	AW124492, GluK2, Glur-6, Glur6, Glurbeta2		Gene not expressed	47
	23	Abca7	10	79999517	SNV	A	C	XP_006513773.1:p.Asn236Thr	XM_006513710.1:c.707A>C	XM_017313957.1:c.[707A>C]; XM_006513711.1:c.[707A>C]; XM_006513710.1:c.[707A>C]; XM_006513712.3:c.[707A>C]; XM_017313958.1:c.[179A>C]; XM_006513714.2:c.[707A>C]; XM_006513713.3:c.[707A>C]; NM_013850.1:c.[707A>C]	XP_017169446.1:p.[Asn236Thr]; XP_006513774.1:p.[Asn236Thr]; XP_006513773.1:p.[Asn236Thr]; XP_006513775.1:p.[Asn236Thr]; XP_017169447.1:p.[Asn60Thr]; XP_006513777.1:p.[Asn236Thr]; XP_006513776.1:p.[Asn236Thr]; NP_038878.1:p.[Asn236Thr]	50	52	38.3462	No	200	93	0	0	1	Abca7	ATP-binding cassette, sub-family A (ABC1), member 7	Abc51, ABCX		Expressed in 75 % of 12 reads	47
	23	Olfr1368	13	21142851	SNV	C	T	NP_666745.1:p.Val69Met	NM_146534.1:c.205G>A	NM_146534.1:c.205G>A	NP_666745.1:p.Val69Met	56	39.2857	37.8636	No	200	176	0	0	0	Olfr1368	olfactory receptor 1368	MOR256-15		Gene not expressed	47
	23	Hist1h3c	13	23745367	SNV	G	A	NP_783584.1:p.Pro44Leu	NM_175653.2:c.131C>T	NM_175653.2:c.131C>T	NP_783584.1:p.Pro44Leu	82	67.0732	37.6727	No	200	253	1	0.004	1	Hist1h3c	histone cluster 1, H3c	H3-143		Expressed in 75 % of 60 reads	47
	23	Olfr736	14	50393581	SNV	A	G	NP_666877.1:p.Gln275Arg	NM_146666.1:c.824A>G	NM_146666.1:c.824A>G	NP_666877.1:p.Gln275Arg	44	47.7273	38.1905	No	200	167	0	0	0.033	Olfr736	olfactory receptor 736	MOR106-5		Gene not expressed	47
	23	Htr1f	16	64926927	Del	T	-	NP_032336.1:p.Met1?	NM_008310.3:c.1delA	NM_008310.3:c.1delA	NP_032336.1:p.Met1?	29	44.8276	38.7692	Yes	200	112	1	0.0089	1	Htr1f	5-hydroxytryptamine (serotonin) receptor 1F	Htr1eb		Gene not expressed	47
	23	Socs5	17	87133890	SNV	T	A	XP_006524735.1:p.Ile86Asn	XM_006524672.3:c.257T>A	XM_006524672.3:c.[257T>A]; NM_019654.2:c.[257T>A]; XM_006524674.3:c.[257T>A]; XM_006524675.3:c.[257T>A]; XM_006524671.3:c.[257T>A]	XP_006524735.1:p.[Ile86Asn]; NP_062628.2:p.[Ile86Asn]; XP_006524737.1:p.[Ile86Asn]; XP_006524738.1:p.[Ile86Asn]; XP_006524734.1:p.[Ile86Asn]	42	47.619	38.3	No	200	106	0	0	1	Socs5	suppressor of cytokine signaling 5	1810018L08Rik, Cish5, mKIAA0671	Ras reduce YAP turnover through downregulation of Socs5/6, working in opposition of the hippo pathway which promotes YAP turnover (PMID: 25180228)	Expressed in 50 % of 20 reads	47
	23	Pten	19	32758509	SNV	A	G	NP_032986.1:p.Asp22Gly				110	95	37.6	No	200	198	0	0		Pten	phosphatase and tensin homolog	2310035O07Rik, A130070J02Rik, AI463227, B430203M17Rik, MMAC1, TEP1	Mutation in the tumor suppressor gene PTEN, a negative regulator of PI3K signalling is common in varioius cancer form. This particular variant has been shown to accumulate in the nucleus ( PMID: 29706633 ).	Expressed in 100% 160 reads	47
	24	Brinp3	1	146751761	SNV	A	T	XP_006529431.1:p.Gln244Leu	XM_006529368.3:c.731A>T	XM_006529368.3:c.[731A>T]; NM_153539.3:c.[731A>T]; XM_006529367.3:c.[731A>T]; XM_011247972.2:c.[-149A>T]; NM_001145807.1:c.[731A>T]; XM_017319792.1:c.[731A>T]	XP_006529431.1:p.[Gln244Leu]; NP_705767.3:p.[Gln244Leu]; XP_006529430.1:p.[Gln244Leu]; NP_001139279.1:p.[Gln244Leu]; XP_017175281.1:p.[Gln244Leu]	75	66.6667	38.5	No	200	213	0	0	1	Brinp3	bone morphogenetic protein/retinoic acid inducible neural specific 3	B830045N13Rik, Fam5c		Gene not expressed	42
	24	LOC102639543	1	173480463	SNV	G	A	XP_006497141.1:p.Pro656Ser	XM_006497078.1:c.1966C>T	XM_011238893.2:c.[1966C>T]; XM_006497078.1:c.[1966C>T]	XP_011237195.1:p.[Pro656Ser]; XP_006497141.1:p.[Pro656Ser]	43	18.6047	38.25	No	200	70	0	0	0.019	LOC102639543				Gene not expressed	42
	24	Rorc	3	94387574	SNV	T	C	NP_001280663.1:p.Cys70Arg	NM_001293734.1:c.208T>C	NM_001293734.1:c.[208T>C]; NM_011281.3:c.[271T>C]; XM_006501163.2:c.[271T>C]; XM_006501164.3:c.[271T>C]	NP_001280663.1:p.[Cys70Arg]; NP_035411.2:p.[Cys91Arg]; XP_006501226.1:p.[Cys91Arg]; XP_006501227.1:p.[Cys91Arg]	11	36.3636	37.25	No	97.5962	53	0	0	1	Rorc	RAR-related orphan receptor gamma	Nr1f3, RORgamma, Thor, TOR	RORγ, encoded by Rorc is a nuclear hormone receptor which controls polarization of naive CD4+ T-cells into proinflammatory Th17 cells.Mice deficient in Rorc, develop T-cell lymphoma with 50% frequency (PMID: 11830550 , 27491564)	Expressed in 66% of 6 reads	42
	24	Dhx37	5	125418482	SNV	A	G	XP_017176254.1:p.Ile881Thr	XM_017320765.1:c.2642T>C	XM_017320766.1:c.[1124T>C]; XM_017320765.1:c.[2642T>C]; NM_203319.1:c.[2642T>C]	XP_017176255.1:p.[Ile375Thr]; XP_017176254.1:p.[Ile881Thr]; NP_976064.1:p.[Ile881Thr]	56	41.0714	38.2174	No	200	132	0	0	1	Dhx37	DEAH (Asp-Glu-Ala-His) box polypeptide 37	Gm1050, Gm451, mKIAA1517		Expressed in 36% of 22 reads	42
	24	Olfr877	9	37855273	SNV	G	A	NP_666529.1:p.Gly152Arg	NM_146417.1:c.454G>A	NM_146417.1:c.454G>A	NP_666529.1:p.Gly152Arg	116	41.3793	37.2083	No	200	279	0	0	0.993	Olfr877	olfactory receptor 877	MOR161-5		Gene not expressed	42
	24	Ccr2	9	124106659	SNV	C	A	XP_011241365.1:p.Phe325Leu	XM_011243063.1:c.975C>A	NM_009915.2:c.[975C>A]; XM_006512428.2:c.[975C>A]; XM_011243064.2:c.[975C>A]; XM_011243063.1:c.[975C>A]	NP_034045.1:p.[Phe325Leu]; XP_006512491.1:p.[Phe325Leu]; XP_011241366.1:p.[Phe325Leu]; XP_011241365.1:p.[Phe325Leu]	79	50.6329	38.625	No	200	212	0	0	1	Ccr2	chemokine (C-C motif) receptor 2	Cc-ckr-2, Ccr2a, Ccr2b, Ckr2, Ckr2a, Ckr2b, Cmkbr2, mJe-r		No coverage	42
	24	Tet1	10	62879833	SNV	G	A	XP_006513930.1:p.Thr61Met	XM_006513867.3:c.182C>T	XM_011243508.2:c.[182C>T]; XM_011243509.2:c.[182C>T]; NM_027384.1:c.[182C>T]; XM_006513867.3:c.[182C>T]; NM_001253857.1:c.[182C>T]; XM_006513869.3:c.[182C>T]	XP_011241810.1:p.[Thr61Met]; XP_011241811.1:p.[Thr61Met]; NP_081660.1:p.[Thr61Met]; XP_006513930.1:p.[Thr61Met]; NP_001240786.1:p.[Thr61Met]; XP_006513932.1:p.[Thr61Met]	65	18.4615	38.75	No	200	146	1	0.0068	0.915	Tet1	tet methylcytosine dioxygenase 1	2510010B09Rik, AA517754, BB001228, Cxxc6, D10Ertd17e, LCX, mKIAA1676	Hypoxia activates the expression of TET1, which also serves as a co-activator of HIF-1α transcriptional regulation to modulate HIF-1α downstream target genes and promote epithelial-mesenchymal transition. (PMID: 26861406). TET2 mutations has been observed in different myeloid malignancies (PMID: 19420352, 19797729 )	No coverage	42
	24	Ikzf1	11	11707895	SNV	C	T	NP_001020768.1:p.Arg51*	NM_001025597.2:c.151C>T	XM_011243700.2:c.[151C>T]; XM_011243717.1:c.[151C>T]; NM_001301863.1:c.[151C>T]; XM_011243709.1:c.[151C>T]; XM_011243715.1:c.[151C>T]; NM_001301865.1:c.[151C>T]; XM_011243707.2:c.[151C>T]; XM_011243702.1:c.[223C>T]; XM_006514682.2:c.[223C>T]; XM_011243713.2:c.[151C>T]; XM_011243711.1:c.[151C>T]; NM_001301866.1:c.[151C>T]; XM_006514680.3:c.[58+22698C>T]; XM_011243704.1:c.[199C>T]; XM_011243718.1:c…	XP_011242002.1:p.[Arg51*]; XP_011242019.1:p.[Arg51*]; NP_001288792.1:p.[Arg51*]; XP_011242011.1:p.[Arg51*]; XP_011242017.1:p.[Arg51*]; NP_001288794.1:p.[Arg51*]; XP_011242009.1:p.[Arg51*]; XP_011242004.1:p.[Arg75*]; XP_006514745.1:p.[Arg75*]; XP_011242015.1:p.[Arg51*]; XP_011242013.1:p.[Arg51*]; NP_001288795.1:p.[Arg51*]; XP_011242006.1:p.[Arg67*]; XP_011242020.1:p.[Arg51*]; NP_001288797.1:p.[Arg…	28	96.4286	38.6667	No	200	93	0	0	0.896	Ikzf1	IKAROS family zinc finger 1	5832432G11Rik, hlk-1, Ikaros, LyF-1, mKIAA4227, Zfpn1a1, Znfn1a1	Genetic alterations of the transcription factor IKZF1 ("IKAROS") are detected frequently in B-cell precursor acute lymphoblastic leukemia and are associated with poor prognosis. (PMID: 27957801). Mice with germline mutations that inactivate Ikzf1 develop T-ALL and the resulting malignancies often have activating NOTCH1 mutations (PMID: 16870249 )	Expressed in 100% of 540 reads	42
	24	Hivep1	13	42164312	SNV	T	A	XP_017170847.1:p.Met2088Lys	XM_017315358.1:c.6263T>A	XM_006516839.3:c.[6263T>A]; XM_006516838.3:c.[6269T>A]; XM_006516840.3:c.[6263T>A]; XM_017315360.1:c.[6269T>A]; XM_017315358.1:c.[6263T>A]; NM_007772.2:c.[6263T>A]; XM_017315359.1:c.[6263T>A]	XP_006516902.1:p.[Met2088Lys]; XP_006516901.1:p.[Met2090Lys]; XP_006516903.1:p.[Met2088Lys]; XP_017170849.1:p.[Met2090Lys]; XP_017170847.1:p.[Met2088Lys]; NP_031798.2:p.[Met2088Lys]; XP_017170848.1:p.[Met2088Lys]	82	42.6829	37.1429	No	200	194	0	0	1	Hivep1	human immunodeficiency virus type I enhancer binding protein 1	Cryabp1		Expressed in 45% of 20 reads	42
	24	Wdr33	18	31888550	SNV	C	T	NP_083142.2:p.Pro718Ser	NM_028866.3:c.2152C>T	XM_006526298.1:c.[2152C>T]; XM_006526300.1:c.[2152C>T]; XM_017317996.1:c.[2152C>T]; NM_028866.3:c.[2152C>T]; XM_006526301.1:c.[2152C>T]	XP_006526361.1:p.[Pro718Ser]; XP_006526363.1:p.[Pro718Ser]; XP_017173485.1:p.[Pro718Ser]; NP_083142.2:p.[Pro718Ser]; XP_006526364.1:p.[Pro718Ser]	29	51.7241	36	No	200	75	1	0.0133	0.995	Wdr33	WD repeat domain 33	1110001N06Rik, 2310011G05Rik, 2810021O11Rik, 8430413N20Rik, WDC146		Expressed in 48% of 66 reads	42
	25	Notch1	2	26459704^26459705	Ins	-	G	NP_032740.3:p.Ser2475fs	NM_008714.3:c.7422_7423insC	NM_008714.3:c.7422_7423insC	NP_032740.3:p.Ser2475fs	79	44.3038	37.2286	Yes	200	169	0	0		Notch1	notch 1	9930111A19Rik, lin-12, Mis6, N1, Tan1	Critical for T-cell development but also frequently mutated in T-ALL (PMID: 28115368 ). Mutations either disrupt the negative regulatory region (NRR), an intramolecular lock that protects the extracellular portion of the receptor from cleavage by ADAM10 in the absence of ligand,35,36 or result in truncation of the PEST domain located in the C-terminal portion of NOTCH1 and involved in the termina…	Expressed in 60% of 885 reads	47
	25	Prdm2	4	143133622	SNV	G	C	NP_001243309.1:p.Leu1033Val	NM_001256380.1:c.3097C>G	XM_006538485.2:c.[2845C>G]; NM_001081355.3:c.[3097C>G]; XM_017319918.1:c.[3097C>G]; XM_011250175.2:c.[509-21845C>G]; XM_006538488.3:c.[2497C>G]; XM_011250174.1:c.[3097C>G]; NM_001256380.1:c.[3097C>G]; XM_006538486.3:c.[2878C>G]	XP_006538548.1:p.[Leu949Val]; NP_001074824.3:p.[Leu1033Val]; XP_017175407.1:p.[Leu1033Val]; XP_006538551.1:p.[Leu833Val]; XP_011248476.1:p.[Leu1033Val]; NP_001243309.1:p.[Leu1033Val]; XP_006538549.1:p.[Leu960Val]	18	33.3333	38.5	No	200	53	0	0	0.129	Prdm2	PR domain containing 2, with ZNF domain	4833427P12Rik, E330024L24Rik, Gm1033, Gm19732, KMT8, Riz, Riz1, Znfpr1c1	Mutations in the histone methyltransferase PRDM2 (RIZ1/2) is recurrent in T-cell prolymphocytic leukemia (PMID: 29352181 ). The gene is suppressed in unfavourable neuroblastomas although not through promotor methylation (PMID: 20878080 ).	Expressed in 41% of 73 reads	47
	25	Gm5862	5	26021749	SNV	T	A	NP_001268454.1:p.Thr52Ser	NM_001281525.1:c.154A>T	NM_001281525.1:c.154A>T	NP_001268454.1:p.Thr52Ser	186	25.2688	37.4043	No	200	522	1	0.0019	0	Gm5862	predicted gene 5862	EG545739	Strain 47	Gene not expressed	47
	25	Ccdc92	5	124836222	SNV	T	C	NP_659068.1:p.Lys81Arg	NM_144819.2:c.242A>G	NM_144819.2:c.[242A>G]; XM_017320799.1:c.[-134A>G]; XM_006504287.3:c.[242A>G]	NP_659068.1:p.[Lys81Arg]; XP_006504350.1:p.[Lys81Arg]	137	24.0876	38.5152	No	200	274	0	0	1	Ccdc92	coiled-coil domain containing 92	AW050178, D5Bwg0834e		Not expressed among 5 reads	47
	25	Cep290	10	100549259	SNV	A	C	XP_006513589.1:p.Thr2143Pro	XM_006513526.2:c.6427A>C	XM_006513527.2:c.[5668A>C]; XM_006513526.2:c.[6427A>C]; XM_006513528.2:c.[5575A>C]; NM_146009.2:c.[5596A>C]	XP_006513590.1:p.[Thr1890Pro]; XP_006513589.1:p.[Thr2143Pro]; XP_006513591.1:p.[Thr1859Pro]; NP_666121.2:p.[Thr1866Pro]	45	42.2222	37.7895	No	200	98	0	0	0	Cep290	centrosomal protein 290	b2b1454Clo, b2b1752Clo, BC004690, Nphp6		Not expressed among 5 reads	47
	25	Adra1b	11	43776354	SNV	C	T	XP_011246977.1:p.Ser352Asn	XM_011248675.2:c.1055G>A	NM_001284381.1:c.[1055G>A]; NM_007416.4:c.[1055G>A]; NM_001284380.1:c.[1055G>A]; XM_011248675.2:c.[1055G>A]	NP_001271310.1:p.[Ser352Asn]; NP_031442.2:p.[Ser352Asn]; NP_001271309.1:p.[Ser352Asn]; XP_011246977.1:p.[Ser352Asn]	22	31.8182	38.8571	No	200	47	0	0	1	Adra1b	adrenergic receptor, alpha 1b	[a]1b		Gene not expressed	47
	25	Lama1	17	67753840	SNV	G	A	NP_032506.2:p.Gly721Asp	NM_008480.2:c.2162G>A	XM_006523717.3:c.[2162G>A]; NM_008480.2:c.[2162G>A]; XM_006523718.3:c.[2162G>A]	XP_006523780.1:p.[Gly721Asp]; NP_032506.2:p.[Gly721Asp]; XP_006523781.1:p.[Gly721Asp]	62	51.6129	37.3438	No	200	158	1	0.0063	1	Lama1	laminin, alpha 1	AA408497, Lama		Gene not expressed	47
	25	Trpm3	19	22978572	SNV	G	C	XP_006527017.1:p.Val1170Leu	XM_006526954.3:c.3508G>C	XM_006526955.3:c.[3502G>C]; NM_177341.4:c.[3391G>C]; XM_006526969.3:c.[3391G>C]; XM_006526976.3:c.[3043G>C]; XM_011247233.2:c.[3472G>C]; XM_006526971.2:c.[3361G>C]; XM_006526978.2:c.[2968G>C]; XM_006526962.3:c.[3436G>C]; XM_006526963.3:c.[3433G>C]; XM_017318155.1:c.[3442G>C]; XM_006526968.3:c.[3391G>C]; XM_006526979.3:c.[3508G>C]; XM_006526958.3:c.[3472G>C]; NM_001035241.2:c.[3367G>C]; NM_0010352…	XP_006527018.1:p.[Val1168Leu]; NP_796315.2:p.[Val1131Leu]; XP_006527032.1:p.[Val1131Leu]; XP_006527039.1:p.[Val1015Leu]; XP_011245535.1:p.[Val1158Leu]; XP_006527034.1:p.[Val1121Leu]; XP_006527041.1:p.[Val990Leu]; XP_006527025.1:p.[Val1146Leu]; XP_006527026.1:p.[Val1145Leu]; XP_017173644.1:p.[Val1148Leu]; XP_006527031.1:p.[Val1131Leu]; XP_006527042.1:p.[Val1170Leu]; XP_006527021.1:p.[Val1158Leu]; …	79	49.3671	38.5385	No	200	207	0	0	1	Trpm3	transient receptor potential cation channel, subfamily M, member 3	6330504P12Rik, 9330180E14, AU018608, B930001P07Rik, LTRPC3, MLSN2		Gene not expressed	47
	25	Zdhhc16	19	41939615	SNV	G	A	XP_006527469.1:p.Cys11Tyr	XM_006527406.2:c.32G>A	NM_023740.2:c.[572G>A]; XM_006527407.2:c.[32G>A]; XM_006527403.2:c.[572G>A]; XM_006527404.3:c.[572G>A]; XM_006527406.2:c.[32G>A]; XM_017318300.1:c.[572G>A]	NP_076229.2:p.[Cys191Tyr]; XP_006527470.1:p.[Cys11Tyr]; XP_006527466.1:p.[Cys191Tyr]; XP_006527467.1:p.[Cys191Tyr]; XP_006527469.1:p.[Cys11Tyr]; XP_017173789.1:p.[Cys191Tyr]	92	52.1739	38.0417	No	200	212	0	0	1	Zdhhc16	zinc finger, DHHC domain containing 16	1500015N03Rik, Aph2		Expressed in 42% of 81 reads	47
	25	ND5	MT	12603	SNV	A	T	NP_904338.1:p.Thr288Ser	NP_904338.1:c.862A>T	NP_904338.1:c.862A>T	NP_904338.1:p.Thr288Ser	159	50.9434	38.6173	No	200	421	0	0	0.283	ND5	Mitocondrial			Expressed in 29% of 3600 reads	47
	26	Spag16	1	70381365	SNV	C	T	NP_083436.2:p.Ala504Val	NM_029160.3:c.1511C>T	NM_025728.4:c.[524C>T]; NM_029160.3:c.[1511C>T]	NP_080004.1:p.[Ala175Val]; NP_083436.2:p.[Ala504Val]	73	39.726	38.2414	No	200	249	0	0	0.266	Spag16	sperm associated antigen 16	4921511D23Rik, 4930524F24Rik, 4930585K05Rik, AV261009, Pf20, Wdr29		Gene not expressed	47
	26	Notch1	2	26460238	SNV	G	A	NP_032740.3:p.Gln2297*	NM_008714.3:c.6889C>T	NM_008714.3:c.6889C>T	NP_032740.3:p.Gln2297*	22	59.0909	39.2308	No	200	76	0	0	1	Notch1	notch 1	9930111A19Rik, lin-12, Mis6, N1, Tan1	Critical for T-cell development but also frequently mutated in T-ALL (PMID: 28115368 ). Mutations either disrupt the negative regulatory region (NRR), an intramolecular lock that protects the extracellular portion of the receptor from cleavage by ADAM10 in the absence of ligand,35,36 or result in truncation of the PEST domain located in the C-terminal portion of NOTCH1 and involved in the termina…	Expressed in 63% of 1243 reads	47
	26	Notch1	2	26466547	SNV	G	T	NP_032740.3:p.Ala1686Asp	NM_008714.3:c.5057C>A	NM_008714.3:c.5057C>A	NP_032740.3:p.Ala1686Asp	67	58.209	37.8974	No	200	226	0	0	1	Notch1	notch 1	9930111A19Rik, lin-12, Mis6, N1, Tan1	Critical for T-cell development but also frequently mutated in T-ALL (PMID: 28115368 ). Mutations either disrupt the negative regulatory region (NRR), an intramolecular lock that protects the extracellular portion of the receptor from cleavage by ADAM10 in the absence of ligand,35,36 or result in truncation of the PEST domain located in the C-terminal portion of NOTCH1 and involved in the termina…	Expressed in 61% of 589 reads	47
	26	Rpl11	4	136052618	SNV	C	T	XP_006539175.1:p.Ala39Thr	XM_006539112.2:c.115G>A	XM_006539112.2:c.[115G>A]; NM_025919.2:c.[106G>A]	XP_006539175.1:p.[Ala39Thr]; NP_080195.1:p.[Ala36Thr]	74	44.5946	37.7879	No	200	219	0	0	1	Rpl11	ribosomal protein L11	2010203J19Rik	RPL11 controls the transcriptional activity of c-Myc, an oncoprotein that positively regulates ribosome biogenesis. It is also involved in the ribosome biogenesis stress pathway that activates p53 through sequestration of MDM2 by a subset of ribosomal proteins (RPs), thereby stabilizing p53 (PMID: 29143558 ). Mutations has been detected in cancer and belived to block the p53-MDM2 circuit (PMID: 2…	Expresssed in 11 % of 1733 reads	47
	26	Olfr303	7	86394805	SNV	C	T	NP_666830.1:p.Arg231Gln	NM_146619.1:c.692G>A	NM_146619.1:c.692G>A	NP_666830.1:p.Arg231Gln	51	50.9804	37.7692	No	200	208	0	0	0	Olfr303	olfactory receptor 303	MOR104-2		Gene not expressed	47
	26	Acsbg1	9	54622704	Del	G	-	XP_006511651.1:p.Pro245fs	XM_006511588.2:c.734delC	XM_006511588.2:c.[734delC]; NM_053178.2:c.[707delC]	XP_006511651.1:p.[Pro245fs]; NP_444408.1:p.[Pro236fs]	64	46.875	34.4	Yes	200	172	0	0	0.147	Acsbg1	acyl-CoA synthetase bubblegum family member 1	BG1, Bgm, E230019G03Rik, GR-LACS, Lpd, R75185		Gene not expressed	47
	26	Abca7	10	79999517	SNV	A	C	XP_006513773.1:p.Asn236Thr	XM_006513710.1:c.707A>C	XM_017313958.1:c.[179A>C]; XM_006513714.2:c.[707A>C]; XM_006513711.1:c.[707A>C]; NM_013850.1:c.[707A>C]; XM_017313957.1:c.[707A>C]; XM_006513710.1:c.[707A>C]; XM_006513712.3:c.[707A>C]; XM_006513713.3:c.[707A>C]	XP_017169447.1:p.[Asn60Thr]; XP_006513777.1:p.[Asn236Thr]; XP_006513774.1:p.[Asn236Thr]; NP_038878.1:p.[Asn236Thr]; XP_017169446.1:p.[Asn236Thr]; XP_006513773.1:p.[Asn236Thr]; XP_006513775.1:p.[Asn236Thr]; XP_006513776.1:p.[Asn236Thr]	30	100	38.1667	No	200	93	0	0	1	Abca7	ATP-binding cassette, sub-family A (ABC1), member 7	Abc51, ABCX		Expressed in 100% of 17 reads	47
	26	Ctsq	13	61037059	SNV	T	C	NP_083912.2:p.Asp271Gly	NM_029636.3:c.812A>G	NM_029636.3:c.812A>G	NP_083912.2:p.Asp271Gly	42	30.9524	37.3846	No	200	109	0	0	0.034	Ctsq	cathepsin Q	1600010J02Rik		Gene not expressed	47
	26	Gga1	15	78889071	SNV	G	A	XP_017171851.1:p.Glu300Lys	XM_017316362.1:c.898G>A	XM_017316362.1:c.[898G>A]; NM_145929.2:c.[898G>A]	XP_017171851.1:p.[Glu300Lys]; NP_666041.1:p.[Glu300Lys]	31	51.6129	38.625	No	200	118	0	0	1	Gga1	golgi associated, gamma adaptin ear containing, ARF binding protein 1	4930406E12Rik, AU016030, AW209092		Expressed in 54% of 84 reads	47
	26	Txnrd2	16	18440812	SNV	A	G	NP_038739.2:p.Ile160Val	NM_013711.3:c.478A>G	NM_013711.3:c.478A>G	NP_038739.2:p.Ile160Val	48	45.8333	39	No	200	181	0	0	0.073	Txnrd2	thioredoxin reductase 2	AA118373, ESTM573010, TGR, Tr3, Trxr2, Trxrd2		Expressed in 33% of 18 reads	47
	27	Col6a3	1	90822161^90822162	Ins	-	C	NP_001229937.1:p.Glu317fs	NM_001243008.1:c.949_950insG	NM_001243008.1:c.[949_950insG]; NM_001243009.1:c.[89-5627_89-5626insG]	NP_001229937.1:p.Glu317fs	33	54.5455	38.5	Yes	200	111	0	0		Col6a3	collagen, type VI, alpha 3	AI507288, Col6a-3	Mutations in COL6A3 has been seen in Wilms tumor (PMID: 28825729 )	No coverage	47
	27	Notch1	2	26466529	SNV	A	G	NP_032740.3:p.Phe1692Ser	NM_008714.3:c.5075T>C	NM_008714.3:c.5075T>C	NP_032740.3:p.Phe1692Ser	43	53.4884	38.5652	No	200	207	0	0	1	Notch1	notch 1	9930111A19Rik, lin-12, Mis6, N1, Tan1	Critical for T-cell development but also frequently mutated in T-ALL (PMID: 28115368 ). Mutations either disrupt the negative regulatory region (NRR), an intramolecular lock that protects the extracellular portion of the receptor from cleavage by ADAM10 in the absence of ligand,35,36 or result in truncation of the PEST domain located in the C-terminal portion of NOTCH1 and involved in the termina…	Expressed in 54% of 255 reads	47
	27	Olfr1231	2	89303259	SNV	G	C	NP_666665.2:p.Ser111*	NM_146454.2:c.332C>G	NM_146454.2:c.332C>G	NP_666665.2:p.Ser111*	44	34.0909	39.3333	No	200	152	0	0	0.004	Olfr1231	olfactory receptor 1231	MOR235-2		Gene not expressed	47
	27	Notch1	2	26460190^26460191	Ins	-	CTGG	NP_032740.3:p.Tyr2313fs	NM_008714.3:c.6936_6937insCCAG	NM_008714.3:c.6936_6937insCCAG	NP_032740.3:p.Tyr2313fs	28	42.8571	38.4894	No	200	92	0	0		Notch1	notch 1	9930111A19Rik, lin-12, Mis6, N1, Tan1	Critical for T-cell development but also frequently mutated in T-ALL (PMID: 28115368 ). Mutations either disrupt the negative regulatory region (NRR), an intramolecular lock that protects the extracellular portion of the receptor from cleavage by ADAM10 in the absence of ligand,35,36 or result in truncation of the PEST domain located in the C-terminal portion of NOTCH1 and involved in the termina…	Expressed in 45% of 547 reads	47
	27	Serpini1	3	75613210	SNV	G	C	NP_033276.1:p.Arg38Pro	NM_009250.2:c.113G>C	NM_009250.2:c.[113G>C]; XM_006501225.3:c.[113G>C]	NP_033276.1:p.[Arg38Pro]; XP_006501288.1:p.[Arg38Pro]	60	46.6667	39.0357	No	200	126	0	0	1	Serpini1	serine (or cysteine) peptidase inhibitor, clade I, member 1	AI837402, Ns, PI-12, PI12, Spi17	SERPINI1 is an important regulator of EMT (PMID: 26892864 )	Expressed in 8% of 12 reads	47
	27	Decr1	4	15919906	SNV	G	T	NP_080448.1:p.Leu271Met	NM_026172.3:c.811C>A	NM_026172.3:c.811C>A	NP_080448.1:p.Leu271Met	16	93.75	36.5333	No	200	121	0	0	1	Decr1	2,4-dienoyl CoA reductase 1, mitochondrial	1200012F07Rik, Decr, Nadph		Expressed in 42% of 48 reads	47
	27	Gm11487	4	73401816	SNV	G	T	NP_001013411.1:p.Ser242Tyr	NM_001013393.1:c.725C>A	NM_001013393.1:c.[725C>A]; XM_011250063.1:c.[758C>A]	NP_001013411.1:p.[Ser242Tyr]; XP_011248365.1:p.[Ser253Tyr]	58	98.2759	37.7719	No	200	294	1	0.0034	0	Gm11487	predicted gene 11487	OTTMUSG00000001246		Gene not expressed	47
	27	Adgra3	5	50009452	SNV	C	T	NP_598672.1:p.Trp186*	NM_133911.1:c.557G>A	NM_133911.1:c.557G>A	NP_598672.1:p.Trp186*	72	41.6667	37.7667	No	200	261	0	0	1	Adgra3	adhesion G protein-coupled receptor A3	3830613O22Rik, AU044632, Gpr125, Tem5-like		Not expressed among 8 reads	47
	27	Gm21671	5	25950853..25950855	Del	CTT	-	NP_001268445.1:p.Lys164del	NM_001281516.1:c.490_492delAAG	NM_001281516.1:c.490_492delAAG	NP_001268445.1:p.Lys164del	85	48.2353	37.0976	No	200	583	1	0.0017	0.038	Gm21671	predicted gene, 21671			Gene not expressed	47
	27	Pkp3	7	141088303	SNV	C	T	NP_001156396.1:p.Gln515*	NM_001162924.1:c.1543C>T	NM_019762.2:c.[1468C>T]; NM_001162924.1:c.[1543C>T]; XM_017322376.1:c.[1234C>T]	NP_062736.2:p.[Gln490*]; NP_001156396.1:p.[Gln515*]; XP_017177865.1:p.[Gln412*]	20	35	39.5714	No	200	76	0	0	1	Pkp3	plakophilin 3	2310056L12Rik		Not expressed among 10 reads	47
	27	Irx3	8	91800497	SNV	T	C	NP_001240751.1:p.Lys193Arg	NM_001253822.1:c.578A>G	NM_001253822.1:c.[578A>G]; NM_008393.3:c.[578A>G]	NP_001240751.1:p.[Lys193Arg]; NP_032419.2:p.[Lys193Arg]	48	47.9167	38.2174	No	200	117	0	0	1	Irx3	Iroquois related homeobox 3	AI894186		Not expressed among 2 reads	47
	27	Chrna5	9	55004705	SNV	G	A	XP_006510836.1:p.Gly263Glu	XM_006510773.3:c.788G>A	NM_176844.4:c.[701G>A]; XM_006510773.3:c.[788G>A]	NP_789814.2:p.[Gly234Glu]; XP_006510836.1:p.[Gly263Glu]	61	47.541	36.6552	No	200	242	1	0.0041	1	Chrna5	cholinergic receptor, nicotinic, alpha polypeptide 5	Acra-5, Acra5		Gene not expressed	47
	27	G3bp1	11	55497723	Del	C	-	NP_038744.1:p.Gln304fs	NM_013716.2:c.910delC	XM_006533444.2:c.[715delC]; NM_013716.2:c.[910delC]	XP_006533507.1:p.[Gln239fs]; NP_038744.1:p.[Gln304fs]	27	37.037	36.4	No	200	109	0	0	1	G3bp1	GTPase activating protein (SH3 domain) binding protein 1	AI849976, B430204O07, C87777, G3bp, mKIAA4115	Downregulation of G3BP1 contribute to p53 stabilization (PMID: 28394340) and G3BP1 down-regulation in sarcoma xenografts prevents in vivo stress granules formation and tumor invasion, and completely blocks lung metastasis in mouse models (PMID: 25800057)	Expressed in 10% of 130 reads	47
	27	Gli3	13	15660991	SNV	G	T	NP_032156.2:p.Gln451His	NM_008130.2:c.1353G>T	XM_006516552.3:c.[1356G>T]; NM_008130.2:c.[1353G>T]	XP_006516615.1:p.[Gln452His]; NP_032156.2:p.[Gln451His]	19	52.6316	37.4	No	200	59	0	0	1	Gli3	GLI-Kruppel family member GLI3	add, AI854843, AU023367, Bph, GLI3-190, GLI3FL, Pdn, Xt	Aberrantly regulated GLI1 has been linked to oncogenic signaling through RAS, MYC and TGFbeta among others and influence the integrity of several DNA damage and repair responses (PMID: 26633513). Gli3 activity in mouse thymic epithelial cells (TECs) promotes positive selection and differentiation from CD4+ CD8+ to CD4+ CD8- single-positive (SP4) cells in the fetal thymus (PMID: 29361554 ).	No coverage	47
	27	Rxfp3	15	11036095	SNV	C	T	NP_848832.1:p.Arg397His	NM_178717.3:c.1190G>A	NM_178717.3:c.1190G>A	NP_848832.1:p.Arg397His	89	31.4607	39.3571	No	200	203	1	0.0049	0.995	Rxfp3	relaxin family peptide receptor 3	BC053073, GPCR135, Rln3r1, Salpr		Gene not expressed	47
	27	Pcdha1	18	37090775	SNV	T	G		NM_198117.2:c.2389-65380T>G	NM_007766.2:c.[2386-65380T>G]; NM_201243.1:c.[2383-65380T>G]; NM_009957.1:c.[2356-65380T>G]; NM_001003671.1:c.[640T>G]; NM_138662.1:c.[2371-65380T>G]; NM_138661.1:c.[2482-65380T>G]; NM_009961.1:c.[2383-65380T>G]; NM_009959.1:c.[2347-65380T>G]; NM_001174154.2:c.[2385+135625T>G]; NM_054072.1:c.[2389-65380T>G]; NM_007767.3:c.[2383-65380T>G]; NM_138663.2:c.[2395-65380T>G]; NM_001301259.1:c.[2382+1144…	NP_001003671.1:p.Ser214Ala	44	52.2727	38	No	200	175	0	0	0.911	Pcdha1, Pcdha2, Pcdha3, Gm37013, Pcdha4, Pcdha5, Gm38666, Pcdha6, Gm38667, Pcdha7, Pcdha8, Pcdha9, Pcdha10, Pcdha11, Pcdha12, Pcdhac1	protocadherin alpha 1, protocadherin alpha 2, protocadherin alpha 3, predicted gene, 37013, protocadherin alpha 4, protocadherin alpha 5, predicted gene, 38666, protocadherin alpha 6, predicted gene, 38667, protocadherin alpha 7, protocadherin alpha 8, protocadherin alpha 9, protocadherin alpha 10, protocadherin alpha 11, protocadherin alpha 12, protocadherin alpha subfamily C, 1	CNR, mKIAA0345, Pcdha4-g, Cnr1, Crnr1, R75250, Cnr6, Crnr6, Pcdha6-g, Cnr2, Crnr2, Pcdha7-g, Cnr4, Crnr4, Cnr3, Cnr8, Crnr3, Crnr8, Pcdha14, A830022B16Rik, Cnr7, Crnr7, Cnr5, Crnr5, Pcdha13, CNRc1		Gene not expressed	47
	27	Olfr1484	19	13585306	SNV	A	G	XP_006527163.1:p.Met1?	XM_006527100.1:c.1A>G	XM_006527100.1:c.[1A>G]; NM_146291.1:c.[1A>G]	XP_006527163.1:p.[Met1?]; NP_666403.1:p.[Met1?]	45	42.2222	38.0526	No	200	224	0	0	0	Olfr1484	olfactory receptor 1484	MOR202-37		Gene not expressed	47
	27	Uba1	X	20681447	SNV	A	C	NP_001263245.1:p.Asn924Thr	NM_001276316.1:c.2771A>C	NM_001276317.1:c.[2771A>C]; NM_001136085.2:c.[2771A>C]; NM_001276316.1:c.[2771A>C]; NM_009457.4:c.[2951A>C]	NP_001263246.1:p.[Asn924Thr]; NP_001129557.1:p.[Asn924Thr]; NP_001263245.1:p.[Asn924Thr]; NP_033483.2:p.[Asn984Thr]	50	48	38.0833	No	200	120	1	0.0083	1	Uba1	ubiquitin-like modifier activating enzyme 1	A1S9, Sbx, Ube-1, Ube1x	UBA1 is the initial enzyme in the ubiquitination cascade and initiates the transfer of ubiquitin molecules to target proteins where they are degraded by the proteasome. It is required for responses to radiation and replication stress in human cells. siRNA-mediated knockdown of UBA1, but not of UBA6, impaired formation of both ubiquitin conjugates at the sites of DNA damage and IR-induced foci (PM…	Expressed in 83% of 381 reads	47
	27	Gm382	X	127062271..127062272	MNV	TC	AG	NP_001028413.2:p.Ile693Lys	NM_001033241.3:c.2078_2079delTCinsAG	NM_001033241.3:c.2078_2079delTCinsAG	NP_001028413.2:p.Ile693Lys	53	56.6038	38.1022	No	200	171	0	0	0.0055	Gm382	predicted gene 382			Gene not expressed	47
	28	Gm4788	1	139736941	SNV	T	C	NP_001025148.3:p.Lys460Arg	NM_001029977.3:c.1379A>G	NM_001160304.1:c.[1379A>G]; NM_001160303.1:c.[1376A>G]; NM_001029977.3:c.[1379A>G]	NP_001153776.1:p.[Lys460Arg]; NP_001153775.1:p.[Lys459Arg]; NP_001025148.3:p.[Lys460Arg]	32	34.375	39.2727	No	200	110	0	0	0	Gm4788	predicted gene 4788	Cfhrc, EG214403		Gene not expressed	47
	28	Lrp2	2	69483900	SNV	G	T	NP_001074557.1:p.Phe2162Leu	NM_001081088.1:c.6486C>A	NM_001081088.1:c.6486C>A	NP_001074557.1:p.Phe2162Leu	11	45.4545	39.4	No	135.013	69	0	0	1	Lrp2	low density lipoprotein receptor-related protein 2	AI315343, AW536255, b2b1625.2Clo, D230004K18Rik, Gp330, Megalin		Gene not expressed	47
	28	Olfr1138	2	87738037	SNV	C	T	NP_666850.1:p.Gly96Ser	NM_146639.1:c.286G>A	NM_146639.1:c.286G>A	NP_666850.1:p.Gly96Ser	66	51.5152	37.9706	No	200	247	0	0	0.043	Olfr1138	olfactory receptor 1138	MOR177-8		Gene not expressed	47
	28	Kras	6	145232194	SNV	C	A	XP_006506981.1:p.Lys117Asn	XM_006506918.3:c.351G>T	XM_006506918.3:c.[351G>T]; XM_006506919.3:c.[351G>T]; NM_021284.6:c.[351G>T]	XP_006506981.1:p.[Lys117Asn]; XP_006506982.1:p.[Lys117Asn]; NP_067259.4:p.[Lys117Asn]	52	36.5385	38.2632	No	200	147	0	0	1	Kras	Kirsten rat sarcoma viral oncogene homolog	AI929937, K-ras, Ki-ras, Kras-2, Kras2, p21B, ras	Oncogenic Ras drive proliferation through two major pathways; MAPK and PI3K (PMID: 29273632). Functional analysis indicates that this is an activating mutation despite not being in the more common 12 and 61 hot spot codons (PMID: 25705018)	Expressed in 32% of 152 reads	47
	28	Klk1b24	7	44191766	SNV	G	T	NP_034773.1:p.Gln174His	NM_010643.2:c.522G>T	XM_006540674.3:c.[513G>T]; NM_010643.2:c.[522G>T]	XP_006540737.1:p.[Gln171His]; NP_034773.1:p.[Gln174His]	93	38.7097	38.6389	No	200	385	1	0.0026	0.988	Klk1b24	kallikrein 1-related peptidase b24	Klk24, mGk-24		Gene not expressed	47
	28	Mrgpra9	7	47235357..47235359	MNV	GTC	CAA	NP_001275730.1:p.Asp187Leu	NM_001288801.1:c.559_561delGACinsTTG	NM_001288801.1:c.559_561delGACinsTTG	NP_001275730.1:p.Asp187Leu	67	17.9104	38.0286	No	200	148	0	0	0	Mrgpra9	MAS-related GPR, member A9	EG668725, MrgA9		Gene not expressed	47
	28	Mctp2	7	72185781^72185782	Ins	-	ACTCAG	XP_006540964.1:p.Glu368_Trp369insSerGlu	XM_006540901.2:c.1105_1106insCTGAGT	XM_006540899.2:c.[1666_1667insCTGAGT]; XM_011250863.2:c.[1666_1667insCTGAGT]; XM_006540901.2:c.[1105_1106insCTGAGT]; NM_001024703.1:c.[1666_1667insCTGAGT]; XM_011250864.1:c.[430_431insCTGAGT]	XP_006540962.1:p.[Glu555_Trp556insSerGlu]; XP_011249165.1:p.[Glu555_Trp556insSerGlu]; XP_006540964.1:p.[Glu368_Trp369insSerGlu]; NP_001019874.1:p.[Glu555_Trp556insSerGlu]; XP_011249166.1:p.[Glu143_Trp144insSerGlu]	77	35.0649	38.2013	No	200	221	0	0		Mctp2	multiple C2 domains, transmembrane 2	Gm489		Expressed in 44% of 16 reads	47
	28	Fam65a	8	105616940	SNV	G	C	XP_006531524.1:p.Lys302Asn	XM_006531461.3:c.906G>C	XM_011248532.2:c.[906G>C]; XM_006531463.1:c.[762G>C]; XM_006531461.3:c.[906G>C]; XM_011248531.2:c.[906G>C]; NM_001081241.2:c.[864G>C]; XM_006531462.3:c.[864G>C]; XM_017312995.1:c.[183G>C]	XP_011246834.1:p.[Lys302Asn]; XP_006531526.1:p.[Lys254Asn]; XP_006531524.1:p.[Lys302Asn]; XP_011246833.1:p.[Lys302Asn]; NP_001074710.2:p.[Lys288Asn]; XP_006531525.1:p.[Lys288Asn]; XP_017168484.1:p.[Lys61Asn]	40	40	38.625	No	200	160	0	0	1	Fam65a	family with sequence similarity 65, member A	2310066E14Rik, AI837433		Expressed in 46% of 28 reads	47
	28	Papln	12	83774428	SNV	G	C	XP_006515568.1:p.Ala207Pro	XM_006515505.3:c.619G>C	XM_006515505.3:c.[619G>C]; NM_001205343.1:c.[619G>C]; NM_130887.3:c.[619G>C]; XM_011244005.2:c.[619G>C]	XP_006515568.1:p.[Ala207Pro]; NP_001192272.1:p.[Ala207Pro]; NP_570957.2:p.[Ala207Pro]; XP_011242307.1:p.[Ala207Pro]	30	36.6667	38.9091	No	200	109	0	0	0	Papln	papilin, proteoglycan-like sulfated glycoprotein	E030033C16Rik		No coverage	47
	28	Pten	19	32811712	SNV	G	T	NP_032986.1:p.Ser170Ile	NM_008960.2:c.509G>T	XM_006526769.2:c.[110G>T]; NM_008960.2:c.[509G>T]	XP_006526832.1:p.[Ser37Ile]; NP_032986.1:p.[Ser170Ile]	39	84.6154	37.8788	No	200	137	0	0	1	Pten	phosphatase and tensin homolog	2310035O07Rik, A130070J02Rik, AI463227, B430203M17Rik, MMAC1, TEP1	Mutation in the tumor suppressor gene PTEN, a negative regulator of PI3K signalling is common in varioius cancer form. This particular S170-variant has been shown to affect protein structure in humans ( PMID: 10555148).	Expressed in 96% of 92 reads	47
	28	ND6	MT	13885	Del	C	-	NP_904339.1:p.Met63fs	NP_904339.1:c.186delG	NP_904339.1:c.186delG	NP_904339.1:p.Met63fs	191	39.267	34.8533	Yes	200	238	0	0	0	ND6	Mitocondrial		Pathogenic mutations in the genes encoding mitochondrial NADH dehydrogenase (ND) subunits have been found to enhance the invasive and metastatic ability of various tumour cells in animal experiments. A ND6 13885insC mutation,was shown to associate to metabolic reprogramming, enhancement of tumour angiogenesis and acquisition of resistance to stress-induced cell death (PMID: 29138417 )	Expressed in 68% of 222 reads	47
	28	Uba1	X	20675892	SNV	T	G	NP_001263245.1:p.Asp585Glu	NM_001276316.1:c.1755T>G	NM_001276317.1:c.[1755T>G]; NM_001276316.1:c.[1755T>G]; NM_001136085.2:c.[1755T>G]; NM_009457.4:c.[1935T>G]	NP_001263246.1:p.[Asp585Glu]; NP_001263245.1:p.[Asp585Glu]; NP_001129557.1:p.[Asp585Glu]; NP_033483.2:p.[Asp645Glu]	30	36.6667	38.0909	No	200	106	0	0	0.939	Uba1	ubiquitin-like modifier activating enzyme 1	A1S9, Sbx, Ube-1, Ube1x	UBA1 is the initial enzyme in the ubiquitination cascade and initiates the transfer of ubiquitin molecules to target proteins where they are degraded by the proteasome. It is required for responses to radiation and replication stress in human cells. siRNA-mediated knockdown of UBA1, but not of UBA6, impaired formation of both ubiquitin conjugates at the sites of DNA damage and IR-induced foci (PM…	Expressed in 95% of 312 reads	47
IRR WT	32	Rem1	2	152633546	SNV	G	A	NM_009047.5:c.511G>A	NP_033073.1:p.Ala171Thr	NP_033073.1:p.Ala171Thr	NM_009047.5:c.511G>A	24	70.8333	38.0588	No	200	71	0	0	1	Rem1	rad and gem related GTP binding protein 1	E030011C07Rik, Ras, Rem		No coverage	47
	32	Gucy1a3	3	82108671	SNV	C	A	XM_006501843.3:c.[1009G>T]; XM_011240184.1:c.[1009G>T]; NM_021896.5:c.[1009G>T]	XP_006501906.1:p.[Gly337Cys]; XP_011238486.1:p.[Gly337Cys]; NP_068696.2:p.[Gly337Cys]	XP_006501906.1:p.Gly337Cys	XM_006501843.3:c.1009G>T	94	58.5106	38.4182	No	200	237	1	0.0042	0.992	Gucy1a3	guanylate cyclase 1, soluble, alpha 3	1200016O07Rik, sGC-alpha1		No coverage	47
	32	Prpf4b	13	34883430	SNV	C	T	XM_017315441.1:c.[241C>T]; XM_017315425.1:c.[241C>T]; XM_017315428.1:c.[241C>T]; XM_017315434.1:c.[241C>T]; XM_017315429.1:c.[241C>T]; XM_017315438.1:c.[241C>T]; NM_013830.2:c.[241C>T]; XM_017315439.1:c.[241C>T]; XM_017315432.1:c.[241C>T]; XM_017315426.1:c.[241C>T]; XM_017315430.1:c.[241C>T]; XM_017315436.1:c.[241C>T]; XM_017315433.1:c.[241C>T]; XM_006516583.3:c.[241C>T]; XM_017315427.1:c.[241C>T…	XP_017170930.1:p.[Arg81Trp]; XP_017170914.1:p.[Arg81Trp]; XP_017170917.1:p.[Arg81Trp]; XP_017170923.1:p.[Arg81Trp]; XP_017170918.1:p.[Arg81Trp]; XP_017170927.1:p.[Arg81Trp]; NP_038858.2:p.[Arg81Trp]; XP_017170928.1:p.[Arg81Trp]; XP_017170921.1:p.[Arg81Trp]; XP_017170915.1:p.[Arg81Trp]; XP_017170919.1:p.[Arg81Trp]; XP_017170925.1:p.[Arg81Trp]; XP_017170922.1:p.[Arg81Trp]; XP_006516646.1:p.[Arg81Tr…	XP_017170928.1:p.Arg81Trp	XM_017315439.1:c.241C>T	71	43.662	37.4839	No	200	232	0	0	0.998	Prpf4b	pre-mRNA processing factor 4B	2610037H07, cbp143, Prp4, Prp4k, Prpk		Expressed in 47% of 146 reads	47
	32	Hhla1	15	65923885	SNV	G	A	NM_001145096.1:c.1471C>T	NP_001138568.1:p.Arg491Trp	NP_001138568.1:p.Arg491Trp	NM_001145096.1:c.1471C>T	38	60.5263	37.8261	No	200	133	0	0	0	Hhla1	HERV-H LTR-associating 1	F930104E18Rik		Gene not expressed	47
	33	Has3	8	106874163	SNV	C	T	XM_006530701.2:c.[256C>T]; XM_006530699.2:c.[256C>T]; NM_008217.4:c.[256C>T]; XM_006530700.3:c.[256C>T]	XP_006530764.1:p.[Arg86Cys]; XP_006530762.1:p.[Arg86Cys]; NP_032243.2:p.[Arg86Cys]; XP_006530763.1:p.[Arg86Cys]	XP_006530764.1:p.Arg86Cys	XM_006530701.2:c.256C>T	26	46.1538	39.4167	No	200	113	0	0	0.001	Has3	hyaluronan synthase 3			Gene not expressed	45
	34	Vmn2r45	7	8471493	SNV	C	A	NM_001105075.1:c.[2535G>T]; XM_017321894.1:c.[2385G>T]	NP_001098545.1:p.[Lys845Asn]; XP_017177383.1:p.[Lys795Asn]	NP_001098545.1:p.Lys845Asn	NM_001105075.1:c.2535G>T	10	30	38	No	62.2318	17	1	0.059	0.03	Vmn2r45	vomeronasal 2, receptor 45			Gene not expressed	42
	34	Itgb8	12	119202444	SNV	C	A	NM_177290.3:c.351G>T	NP_796264.2:p.Gln117His	NP_796264.2:p.Gln117His	NM_177290.3:c.351G>T	56	32.1429	38	No	200	157	0	0	1	Itgb8	integrin beta 8	4832412O06Rik		Expressed in 20% of 5 reads	42
IRR WIP1	35	Gm5862	5	26021749	SNV	T	A	NM_001281525.1:c.154A>T	NP_001268454.1:p.Thr52Ser	NP_001268454.1:p.Thr52Ser	NM_001281525.1:c.154A>T	144	22.9167	37.4242	No	200	522	1	0.0019	0	Gm5862	predicted gene 5862	EG545739		Gene not expressed	47
	35	Prpf4b	13	34883430	SNV	C	T	XM_017315430.1:c.[241C>T]; XM_006516584.3:c.[241C>T]; XM_017315441.1:c.[241C>T]; XM_017315428.1:c.[241C>T]; XM_017315426.1:c.[241C>T]; NM_013830.2:c.[241C>T]; XM_017315432.1:c.[241C>T]; XM_017315433.1:c.[241C>T]; XM_017315438.1:c.[241C>T]; XM_017315440.1:c.[241C>T]; XM_017315439.1:c.[241C>T]; XM_017315431.1:c.[241C>T]; XM_017315429.1:c.[241C>T]; XM_017315435.1:c.[241C>T]; XM_006516583.3:c.[241C>T…	XP_017170919.1:p.[Arg81Trp]; XP_006516647.1:p.[Arg81Trp]; XP_017170930.1:p.[Arg81Trp]; XP_017170917.1:p.[Arg81Trp]; XP_017170915.1:p.[Arg81Trp]; NP_038858.2:p.[Arg81Trp]; XP_017170921.1:p.[Arg81Trp]; XP_017170922.1:p.[Arg81Trp]; XP_017170927.1:p.[Arg81Trp]; XP_017170929.1:p.[Arg81Trp]; XP_017170928.1:p.[Arg81Trp]; XP_017170920.1:p.[Arg81Trp]; XP_017170918.1:p.[Arg81Trp]; XP_017170924.1:p.[Arg81Tr…	XP_017170928.1:p.Arg81Trp	XM_017315439.1:c.241C>T	70	48.5714	37.2353	No	200	232	0	0	0.998	Prpf4b	pre-mRNA processing factor 4B	2610037H07, cbp143, Prp4, Prp4k, Prpk		Expressed in 56% of 177 reads	47
	35	Hhla1	15	65923885	SNV	G	A	NM_001145096.1:c.1471C>T	NP_001138568.1:p.Arg491Trp	NP_001138568.1:p.Arg491Trp	NM_001145096.1:c.1471C>T	46	47.8261	37.7727	No	200	133	0	0	0	Hhla1	HERV-H LTR-associating 1	F930104E18Rik		Gene not expressed	47
	36	Cenpf	1	189657229	SNV	G	C	XM_006497119.2:c.[4189C>G]; NM_001081363.2:c.[4405C>G]; XM_017320925.1:c.[4189C>G]	XP_006497182.1:p.[Pro1397Ala]; NP_001074832.2:p.[Pro1469Ala]; XP_017176414.1:p.[Pro1397Ala]	NP_001074832.2:p.Pro1469Ala	NM_001081363.2:c.4405C>G	49	42.8571	37.4762	No	200	107	0	0	0	Cenpf	centromere protein F	6530404A22Rik, AI325968, CENF, Lek1, mitosin, PRO1779		Expressed in 39% of 18 reads	45
	36	Asap3	4	136242873..136242898	Del	CAAATTCAGGTTGGTATGGCCCCTGC	-	XM_006538761.3:c.[2439_2447+17delCAAATTCAGGTTGGTATGGCCCCTGC]; XM_006538762.3:c.[1722_1730+17delCAAATTCAGGTTGGTATGGCCCCTGC]; XM_011250233.2:c.[2418_2426+17delCAAATTCAGGTTGGTATGGCCCCTGC]; NM_001008232.2:c.[2541_2549+17delCAAATTCAGGTTGGTATGGCCCCTGC]	XP_006538824.1:p.[Lys814_Ser816del]; XP_006538825.1:p.[Lys575_Ser577del]; XP_011248535.1:p.[Lys807_Ser809del]; NP_001008233.1:p.[Lys848_Ser850del]	XP_011248535.1:p.Lys807_Ser809del	XM_011250233.2:c.2418_2426+17delCAAATTCAGGTTGGTATGGCCCCTGC	13	100	36.6923	No	200	0	0	0	0.690192	Asap3	ArfGAP with SH3 domain, ankyrin repeat and PH domain 3	9430088F20Rik, Ddefl1, Gm140, UPLC1	No coverage in normal	Not expressed among 5 reads	45
	36	Scml4	10	42935102	SNV	G	A	XM_011243174.2:c.[-90G>A]; XM_006512752.3:c.[733+4498G>A]; XM_006512750.3:c.[883G>A]; XM_006512753.3:c.[463G>A]; XM_006512751.3:c.[778G>A]; NM_172938.3:c.[637G>A]	XP_006512813.1:p.[Ala295Thr]; XP_006512816.1:p.[Ala155Thr]; XP_006512814.1:p.[Ala260Thr]; NP_766526.3:p.[Ala213Thr]		XM_011243174.2:c.-90G>A	46	26.087	37.6667	No	200	83	0	0	0.009	Scml4	sex comb on midleg-like 4 (Drosophila)	9330161D17, mFLJ00197		Expressed in 48% of 23 reads	45
	36	Bfar, 3110001I22Rik	16	13677689	SNV	G	A	NM_025653.2:c.[651G>A]; NM_025976.5:c.[-75+5611G>A]; NM_001177552.1:c.[-75+5611G>A]	NP_079929.1:p.Met217Ile		NM_025976.5:c.-75+5611G>A	59	47.4576	38.1786	No	200	170	0	0	0.454	Bfar, 3110001I22Rik	bifunctional apoptosis regulator, RIKEN cDNA 3110001I22 gene	3010001A07Rik, AI666707, AW107665, Bar, Rnf47		Expressed in 58% of 19 reads	45
	36	Tbc1d23	16	57231314..57231320	Del	CAGCTGT	-	NM_026254.2:c.[47_53delACAGCTG]; XM_006522484.3:c.[47_53delACAGCTG]; XM_006522485.1:c.[-325_-319delACAGCTG]	NP_080530.2:p.[Asp16fs]; XP_006522547.1:p.[Asp16fs]	XP_006522547.1:p.Asp16fs	XM_006522484.3:c.47_53delACAGCTG	35	40	37	No	200	80	0	0	0.635857	Tbc1d23	TBC1 domain family, member 23	4930451A13Rik, AU015720, AU043671, AU043778, D030022P07Rik, W51689		Expressed in 50% of 25 reads	45
	37	Phgr1	2	118777946..118778008	Del	CCTGGAGGACATCACCCTCCAGGGCATGGTGGCCCATCCCATGGCCATGGCCCAGGGCACTGT	-	NM_001145644.1:c.250_312delCCTGGAGGACATCACCCTCCAGGGCATGGTGGCCCATCCCATGGCCATGGCCCAGGGCACTGT	NP_001139116.1:p.Pro84_Cys104del	NP_001139116.1:p.Pro84_Cys104del	NM_001145644.1:c.250_312delCCTGGAGGACATCACCCTCCAGGGCATGGTGGCCCATCCCATGGCCATGGCCCAGGGCACTGT	15	60	35.719	No	200	12	0	0	0.00188889	Phgr1	proline/histidine/glycine-rich 1	1810007E14Rik, AA238765		Gene not expressed	42
Abbreviations; SNV, Single nucleotide variant; MNV, multiple nucleotide variant (>2 SNVs in succession); Ins, Insertion; Del, Deletion; Rep, Replacement (complex event)

## Sheet: Supp Table S1-Sequencing info
Table S1. Exome and RNA Sequencing information, Related to Figure 3.
		Exome Seq				RNAseq				RNAseq
	Sample-ID	Average Coverage	target regions <10X	Total Mapped reads	Mapped in targeted regions	No reads	Total Mapped reads			Case-ID RNA	RNA Index
Lymphoma developed in IRR WIP1	14	80.4	7486	59882369	49483297	55309516	53232876			OtB8318	Index1
	15	78,4	7681	58398026	48027998	62750694	58002610			OtB8319	Index2
	16	69,9	9252	51844850	42612550	45182502	43665291			OtB8592	Index3
	17	70,9	8904	52650317	42543689	44801118	42973953			OtB8321	Index2
	18	99,2	6627	75129686	61326028	45182502	43665291			OtB8322	Index3
	19	70,2	9670	52337306	42658474	58918710	56440643			OtB8323	Index4
	20	75,1	7668	55490760	45298483	62886190	61206224			OtB8324	Index5
	21	63,6	11020	47760704	39381998	-	-
	22	60,3	11548	45023009	36557168	54548876	52160427			OtB8326	Index6
	23	67,8	9645	50625008	42068619	53610696	51739052			OtB8327	Index7
	24	65,3	10152	49312298	40883084	44559490	42715252			OtB8328	Index8
	25	75,9	8192	56109553	46137620	49551502	47354822			OtB8329	Index9
	26	51,9	15967	41656349	33409335	50643256	48673049			OtB8330	Index10
	27	49,5	20591	39446982	32590975	44373384	42375421			OtB8331	Index11
	28	49,9	17132	40283249	31822246	39221954	37742567			OtB8332	Index12
Non-IRR WT	29	55,0	14219	44 324 247	34 778 491	56 129 910	53 891 764			OtB8333	Index13
	30	49,2	16923	39864558	31615006	53815260	51964592			OtB8334	Index14
	31	53,0	15037	42735582	33766463	50785066	48826706			OtB8335	Index15
IRR WT	32	55,5	13605	44689458	35414417	45799420	44273878			OtB8339	Index20
	33	47,5	19016	39723979	30830448	51243626	49320406			OtB8340	Index21
	34	53,8	14037	43902626	34174691	51206504	49104810			OtB8341	Index22
IRR WIP1	35	52,6	16257	42368896	33382755	48240958	46442720			OtB8342	Index23
	36	60,1	11561	48161923	38648537	56377180	54204200			OtB8343	Index25
	37	57,7	12599	47600139	36394260	54352782	52324659			OtB8344	Index27
Non-IRR WIP1	38	-	-	-	-	41249230	39555564			OtB8336	Index16
	39	-	-	-	-	46430624	44577612			OtB8337	Index18
	40	-	-	-	-	55595102	53549706			OtB8338	Index19
Abbreviations; IRR, irradiated; WT, wild type; WIP1, PPM1D (WIP1)-transgenic mice
		Average = 80,0 X	Average = 12 199	Average = 48,9M	Average = 39,5M	Average = 51,1M	Average = 49,0M
		Range = 47,5-99,2	Range = 8 192-20 591	Range = 39,4-75,1M	Range = 30,8-61,3M	Range = 41,2-62,8M	Range = 39,6-61,2M
OC	39	36,9	33139	29056814	21759497	71461238	68918653			OtB8594	Index4

## Sheet: Table S1-Notch & Pten
Table S1. Notch & Pten aberrations, Related to Figure 3.
Sample ID	Gene	Chr	Position (mm10)	Type	Ref	Var	Amino acid change	Equivalent human position	Domain	Coverage	Var Freq	Present in RNAseq
20	Notch1	2	26467980	SNV	T	C	NP_032740.3:p.Asp1546Gly	NP_060087.3:p.Asp1546	LNR	22	50	Expressed in 50 % of 140 reads
21	Notch1	2	26466601	SNV	A	G	NP_032740.3:p.Leu1668Pro	NP_060087.3:p.Leu1678	NODP: pfam07684	85	55.2941	NA
23	Notch1	2	26466601	SNV	A	G	NP_032740.3:p.Leu1668Pro	NP_060087.3:p.Leu1678	NODP: pfam07684	87	42.5287	Expressed in 50 % of 500 reads
17	Notch1	2	26466595	SNV	A	T	NP_032740.3:p.Ile1670Asn	NP_060087.3:p.Ile1680	NODP: pfam07684	101	51.4851	Expressed in 50 % of 332 reads
19	Notch1	2	26466595	SNV	A	T	NP_032740.3:p.Ile1670Asn	NP_060087.3:p.Ile1680	NODP: pfam07684	89	44.9438	Expressed in 50 % of 600 reads
26	Notch1	2	26466547	SNV	G	T	NP_032740.3:p.Ala1686Asp	NP_060087.3:p.Ala1696	NODP: pfam07684	67	58.209	Expressed in 61% of 589 reads
27	Notch1	2	26466529	SNV	A	G	NP_032740.3:p.Phe1692Ser	NP_060087.3:p.Phe1702	NODP: pfam07684	43	53.4884	Expressed in 54% of 255 reads
22	Notch1	2	26460279^26460280	Ins	-	C	NP_032740.3:p.Ala2283fs	NP_060087.3:p.Ala2293	PHA03247	32	43.75	Expressed in 47% of 601 reads
26	Notch1	2	26460238	SNV	G	A	NP_032740.3:p.Gln2297*	NP_060087.3:p.Gly2307	PHA03247	22	59.0909	Expressed in 63% of 1243 reads
27	Notch1	2	26460190^26460191	Ins	-	CTGG	NP_032740.3:p.Tyr2313fs	NP_060087.3:p.Tyr2323	PHA03247	28	42.8571	Expressed in 45% of 547 reads
23	Notch1	2	26460159	Del	C	-	NP_032740.3:p.Gly2323fs	NP_060087.3:p.Glu2333	PHA03247	44	47.7273	Expressed in 50 % of 1000 reads
23	Notch1	2	26460073^26460074	Ins	-	CAGAG	NP_032740.3:p.Ile2352fs	NP_060087.3:p.Met2362	PHA03247	57	33.3333	Expressed in 50 % of 900 reads
17	Notch1	2	26460045	Rep	C	GAGGG	NP_032740.3:p.Arg2361fs	NP_060087.3:p.Arg2371	PHA03247	41	41.4634	Expressed in 50 % of 574 reads
19	Notch1	2	26459983	SNV	G	A	NP_032740.3:p.Gln2382*	NP_060087.3:p. Gln2393	PHA03247	31	38.7097	Expressed in 50 % of 900 reads
25	Notch1	2	26459704^26459705	Ins	-	G	NP_032740.3:p.Ser2475fs	NP_060087.3:p.Ser2499	DUF3454	79	44.3038	Expressed in 60% of 885 reads
21	Pten	19	32758480^32758481	Ins	-	A	NP_032986.1:p.Arg14fs	NP_000305.3:p.Arg14		93	96.7742	NA
23	Pten	19	32758509	SNV	A	G	NP_032986.1:p.Asp22Gly	NP_000305.3:p.Asp22Gly		110	95	Expressed in 100% 160 reads
28	Pten	19	32811712	SNV	G	T	NP_032986.1:p.Ser170Ile	NP_000305.3:p.Ser170Ile		39	84.6154	Expressed in 96% of 92 reads
