# Supplementary material for: High Expression of PPM1D Induces Tumors Phenotypically Similar to TP53 Loss-of-Function Mutations in Mice
Source: Cancers (Basel). 2021 Oct 31;13(21):5493. doi: 10.3390/cancers13215493 (PMC8582939; doi:10.3390/cancers13215493)
Supplement: Supplementary file 1 [file cancers-13-05493-s001.zip › Supp Table S2 (related to Fig 3).xlsx]

## Sheet: Table S2-DGE_DOWN
Table S2. Differential gene expression analysis, 4378 downregulated genes, Related to Figure 3.
	baseMean	log2FoldChange	lfcSE	stat	pvalue	padj	gene
ENSMUSG00000023235	1510.32	-5.34613	0.162264	-32.9472	4.64378e-238	1.14135e-233	Ccl25
ENSMUSG00000006179	3886.15	-9.86516	0.419834	-23.4978	4.29862e-122	5.28258e-118	Prss16
ENSMUSG00000085041	504.26	-10.1136	0.459441	-22.0128	2.16955e-107	1.77744e-103	BB031773
ENSMUSG00000095574	267.772	-8.48664	0.404039	-21.0045	5.96263e-98	2.93099e-94	Trbv12-1
ENSMUSG00000072423	510.096	-11.4346	0.58386	-19.5844	2.10076e-85	7.37606e-82	Psmb11
ENSMUSG00000052105	68.0397	-5.07384	0.259942	-19.5191	7.55785e-85	2.32196e-81	Mtcl1
ENSMUSG00000025551	64.6036	-6.79333	0.376224	-18.0566	7.00283e-73	1.91239e-69	Fgf14
ENSMUSG00000114534	94.0284	-10.0233	0.59444	-16.8617	8.60362e-64	2.1146e-60	CT009733,1
ENSMUSG00000063109	104.655	-4.42151	0.268872	-16.4447	9.15433e-61	2.04541e-57	Dgkeos
ENSMUSG00000031132	68.0506	-6.05179	0.370111	-16.3513	4.25861e-60	8.72235e-57	Cd40lg
ENSMUSG00000098959	62.7928	-5.7591	0.352834	-16.3224	6.84015e-60	1.29321e-56	Gm27230
ENSMUSG00000062257	45.2218	-6.52313	0.405441	-16.089	3.04718e-58	5.34955e-55	Opcml
ENSMUSG00000034783	69.0125	-6.80708	0.442448	-15.385	2.06292e-53	2.98249e-50	Cd207
ENSMUSG00000046991	32.5531	-5.86738	0.385626	-15.2152	2.80353e-52	3.82807e-49	Wdr27
ENSMUSG00000060487	28.4511	-4.35688	0.289981	-15.0247	5.05711e-51	6.54178e-48	Samd5
ENSMUSG00000021483	584.542	-2.82093	0.193977	-14.5426	6.50533e-48	7.99441e-45	Cdk20
ENSMUSG00000076461	335.237	-8.08326	0.565333	-14.2982	2.24447e-46	2.50748e-43	Trbv1
ENSMUSG00000028024	249.745	-5.28354	0.371843	-14.2091	8.04801e-46	8.24184e-43	Enpep
ENSMUSG00000042961	55.5724	-3.52892	0.251078	-14.0551	7.17077e-45	6.52752e-42	Egflam
ENSMUSG00000067144	52.8866	-7.59963	0.54374	-13.9766	2.16687e-44	1.90205e-41	Slc22a7
ENSMUSG00000098801	64.0656	-6.0372	0.433945	-13.9124	5.32745e-44	4.3646e-41	Gm27255
ENSMUSG00000035126	1052.52	-4.30073	0.311889	-13.7893	2.95646e-43	2.27075e-40	Wdr78
ENSMUSG00000112441	37.441	-7.09921	0.515696	-13.7663	4.06713e-43	3.02915e-40	AC122860,2
ENSMUSG00000108985	52.1475	-5.67514	0.41471	-13.6846	1.25509e-42	9.07284e-40	A930030B08Rik
ENSMUSG00000050052	264.889	-5.43736	0.397451	-13.6806	1.32664e-42	9.31606e-40	Tdrp
ENSMUSG00000056296	54.5397	-8.20087	0.607893	-13.4906	1.77542e-41	1.17936e-38	Synpr
ENSMUSG00000023959	523.854	-4.5508	0.33747	-13.485	1.91538e-41	1.23885e-38	Clic5
ENSMUSG00000041309	57.7752	-7.3057	0.547205	-13.3509	1.16995e-40	7.37306e-38	Nkx6-2
ENSMUSG00000076761	19.6195	-7.7627	0.583293	-13.3084	2.06892e-40	1.24024e-37	Trav5-1
ENSMUSG00000107583	17.9302	-4.48277	0.342398	-13.0923	3.64415e-39	2.13252e-36	Gm44104
ENSMUSG00000040289	102.989	-3.52231	0.269433	-13.073	4.69516e-39	2.68366e-36	Hey1
ENSMUSG00000047842	364.815	-5.43454	0.417308	-13.0229	9.06948e-39	5.06613e-36	Diras2
ENSMUSG00000037624	51.8506	-5.37766	0.413656	-13.0003	1.21821e-38	6.65362e-36	Kcnk2
ENSMUSG00000022508	1203.73	-3.60441	0.280707	-12.8404	9.73271e-38	5.08959e-35	Bcl6
ENSMUSG00000079434	26.0208	-7.54517	0.588159	-12.8284	1.13628e-37	5.81822e-35	Neu2
ENSMUSG00000053541	127.716	-5.05471	0.395393	-12.784	2.01348e-37	9.89748e-35	Gm4759
ENSMUSG00000037086	28.2964	-6.52961	0.511792	-12.7583	2.80212e-37	1.32443e-34	Prr32
ENSMUSG00000114213	17.1801	-7.77969	0.613431	-12.6823	7.41607e-37	3.4391e-34	AC126549,1
ENSMUSG00000037266	8718.14	-1.47217	0.116868	-12.5969	2.19677e-36	9.99857e-34	Rsrp1
ENSMUSG00000037833	97.2879	-4.99582	0.398848	-12.5256	5.40518e-36	2.41543e-33	Sh2d4b
ENSMUSG00000022747	201.543	-3.91181	0.31765	-12.3148	7.53619e-35	3.19353e-32	St3gal6
ENSMUSG00000085184	17.4094	-5.22359	0.424785	-12.297	9.39952e-35	3.88104e-32	4933439K11Rik
ENSMUSG00000033446	736.6	-2.14552	0.174692	-12.2817	1.13557e-34	4.57541e-32	Lpar6
ENSMUSG00000039628	32.8068	-5.72689	0.46753	-12.2492	1.6957e-34	6.61536e-32	Hs3st6
ENSMUSG00000051515	16.2722	-3.8949	0.319326	-12.1973	3.21463e-34	1.21552e-31	Fam181b
ENSMUSG00000097191	23.5009	-3.60918	0.297118	-12.1473	5.93048e-34	2.20848e-31	5730422E09Rik
ENSMUSG00000032316	4835.57	-1.77467	0.146192	-12.1393	6.53691e-34	2.39797e-31	Clk3
ENSMUSG00000078503	25.3852	-4.22455	0.348393	-12.1258	7.71017e-34	2.74639e-31	Zfp990
ENSMUSG00000084128	175.989	-4.84408	0.399984	-12.1107	9.2713e-34	3.25529e-31	Esrp2
ENSMUSG00000029059	554.138	-3.80738	0.316016	-12.0481	1.98542e-33	6.77746e-31	Fam213b
ENSMUSG00000039236	543.522	-2.75812	0.229256	-12.0308	2.44915e-33	8.24593e-31	Isg20
ENSMUSG00000015396	650.547	-3.58723	0.298913	-12.0009	3.51402e-33	1.16713e-30	Cd83
ENSMUSG00000037016	16.3961	-4.6978	0.391785	-11.9907	3.97309e-33	1.30201e-30	Frem2
ENSMUSG00000100975	148.052	-1.71076	0.143201	-11.9466	6.76735e-33	2.1601e-30	Gm28875
ENSMUSG00000046807	14.7509	-4.37919	0.367009	-11.9321	8.05365e-33	2.53773e-30	Lrrc75b
ENSMUSG00000087305	105.49	-3.82285	0.321001	-11.9092	1.06037e-32	3.29896e-30	A430035B10Rik
ENSMUSG00000044786	914.577	-2.15891	0.183706	-11.752	6.89854e-32	2.09324e-29	Zfp36
ENSMUSG00000035580	27.2884	-7.19387	0.612514	-11.7448	7.50851e-32	2.25054e-29	Kcnh8
ENSMUSG00000063887	21.0213	-6.61745	0.565323	-11.7056	1.19307e-31	3.53291e-29	Nlgn1
ENSMUSG00000030157	285.581	-3.22963	0.276504	-11.6802	1.60928e-31	4.65329e-29	Clec2d
ENSMUSG00000047712	70.8411	-2.66032	0.22787	-11.6747	1.7163e-31	4.90502e-29	Ust
ENSMUSG00000104620	17.0036	-6.71946	0.576451	-11.6566	2.12342e-31	5.9306e-29	Trav7-1
ENSMUSG00000028341	98.1792	-3.91366	0.336657	-11.6251	3.07368e-31	8.48819e-29	Nr4a3
ENSMUSG00000063889	141.98	-1.58381	0.136392	-11.6122	3.57351e-31	9.75887e-29	Crem
ENSMUSG00000076481	21.5846	-6.85796	0.59188	-11.5867	4.81075e-31	1.29933e-28	Trbv30
ENSMUSG00000038604	1569.49	-1.4968	0.129453	-11.5625	6.38142e-31	1.68648e-28	Ripor1
ENSMUSG00000087080	9.71953	-6.74919	0.587365	-11.4906	1.47045e-30	3.80429e-28	Gm12199
ENSMUSG00000090574	16.0857	-5.55281	0.484613	-11.4582	2.13802e-30	5.36206e-28	Traj61
ENSMUSG00000100279	10.1459	-6.80779	0.597118	-11.4011	4.12913e-30	9.85299e-28	Gm29387
ENSMUSG00000030340	382.074	-4.39681	0.385935	-11.3926	4.55147e-30	1.07563e-27	Scnn1a
ENSMUSG00000032502	21.309	-3.80877	0.335352	-11.3575	6.80331e-30	1.59249e-27	Stac
ENSMUSG00000030699	57.0026	-3.53931	0.312524	-11.3249	9.87505e-30	2.2473e-27	Tbx6
ENSMUSG00000066892	2069.41	-2.13652	0.190079	-11.2402	2.58776e-29	5.78199e-27	Fbxl12
ENSMUSG00000030701	226.255	-5.19343	0.463399	-11.2073	3.75669e-29	8.31819e-27	Plekhb1
ENSMUSG00000039578	24.238	-2.9927	0.268213	-11.1579	6.55032e-29	1.42472e-26	Ccser1
ENSMUSG00000064329	25.821	-6.38722	0.574794	-11.1122	1.09444e-28	2.35958e-26	Scn1a
ENSMUSG00000029722	1790.54	-2.16173	0.194874	-11.0929	1.35756e-28	2.87639e-26	Agfg2
ENSMUSG00000027314	176.627	-3.10815	0.281407	-11.045	2.31681e-28	4.82564e-26	Dll4
ENSMUSG00000029330	186.743	-4.04014	0.366064	-11.0367	2.54171e-28	5.24958e-26	Cds1
ENSMUSG00000076874	16.4092	-5.24118	0.475657	-11.0188	3.10133e-28	6.35203e-26	Traj59
ENSMUSG00000084774	8.0367	-6.68455	0.607095	-11.0107	3.39263e-28	6.89125e-26	Gm14110
ENSMUSG00000094220	17.3741	-5.11011	0.464454	-11.0024	3.72151e-28	7.49732e-26	Trav6-3
ENSMUSG00000032841	64.3795	-2.8582	0.260167	-10.986	4.461e-28	8.91403e-26	Prr5l
ENSMUSG00000105453	12.8688	-4.40715	0.401313	-10.9818	4.67372e-28	9.26377e-26	Gm43702
ENSMUSG00000079355	65.7458	-3.2958	0.301987	-10.9137	9.91247e-28	1.94903e-25	Ackr4
ENSMUSG00000036528	107.808	-2.23919	0.205414	-10.9009	1.14152e-27	2.22668e-25	Ppfibp2
ENSMUSG00000076764	10.1996	-6.39609	0.587954	-10.8786	1.45856e-27	2.80066e-25	Trav6-2
ENSMUSG00000024211	8.76561	-6.59973	0.609393	-10.83	2.4816e-27	4.65594e-25	Grm8
ENSMUSG00000037363	116.951	-2.01398	0.187118	-10.7632	5.1381e-27	9.49506e-25	Letm2
ENSMUSG00000032479	3741.21	-1.37604	0.127946	-10.7548	5.62507e-27	1.03174e-24	Map4
ENSMUSG00000031870	16.6687	-5.76717	0.536689	-10.7458	6.20081e-27	1.12891e-24	Pgr
ENSMUSG00000054263	582.381	-3.29592	0.306763	-10.7442	6.31079e-27	1.14049e-24	Lifr
ENSMUSG00000041624	9.97929	-3.61888	0.337157	-10.7335	7.08479e-27	1.27102e-24	Gucy1a2
ENSMUSG00000005054	2203.52	-1.90113	0.179063	-10.6171	2.48208e-26	4.38882e-24	Cstb
ENSMUSG00000059839	70.7743	-1.70987	0.161799	-10.5679	4.19677e-26	7.36772e-24	Zfp874b
ENSMUSG00000020682	43.3542	-3.69922	0.35136	-10.5283	6.40019e-26	1.11563e-23	Mmp28
ENSMUSG00000037868	175.198	-3.79693	0.360775	-10.5244	6.67018e-26	1.1545e-23	Egr2
ENSMUSG00000047591	13.4746	-4.54239	0.432304	-10.5074	7.98728e-26	1.37281e-23	Mafa
ENSMUSG00000029030	1915.52	-1.00758	0.0961141	-10.4832	1.03225e-25	1.76185e-23	Tprgl
ENSMUSG00000044071	9.96679	-6.35977	0.608294	-10.4551	1.3885e-25	2.33743e-23	Fam19a2
ENSMUSG00000017561	1556.17	-1.15155	0.110638	-10.4083	2.27225e-25	3.77348e-23	Crlf3
ENSMUSG00000002346	308.214	-1.87011	0.179722	-10.4056	2.33891e-25	3.8581e-23	Slc25a42
ENSMUSG00000046618	45.8039	-2.50029	0.240764	-10.3848	2.90664e-25	4.76262e-23	Olfml2a
ENSMUSG00000020124	1869.8	-0.963913	0.0928556	-10.3808	3.0332e-25	4.93709e-23	Usp15
ENSMUSG00000051502	100.344	-3.10305	0.299362	-10.3655	3.55793e-25	5.75308e-23	Ufsp1
ENSMUSG00000067220	123.733	-3.70037	0.35782	-10.3414	4.57645e-25	7.3039e-23	Cnga1
ENSMUSG00000032652	255.968	-1.93352	0.186987	-10.3404	4.62447e-25	7.33292e-23	Crebl2
ENSMUSG00000050919	65.0011	-2.54541	0.246347	-10.3326	5.01814e-25	7.90614e-23	Zfp366
ENSMUSG00000039546	20.442	-5.61572	0.543742	-10.3279	5.26974e-25	8.24966e-23	Ajap1
ENSMUSG00000040875	77.7998	-4.03212	0.390502	-10.3255	5.40424e-25	8.40667e-23	Osbpl10
ENSMUSG00000076795	14.9888	-5.73532	0.558854	-10.2626	1.03825e-24	1.57519e-22	Trav8d-2
ENSMUSG00000043461	27.3893	-6.20499	0.605308	-10.251	1.17174e-24	1.7668e-22	Sptssb
ENSMUSG00000076475	464.181	-5.98857	0.584409	-10.2472	1.21795e-24	1.82529e-22	Trbv19
ENSMUSG00000035211	297.829	-4.79568	0.469031	-10.2247	1.53754e-24	2.27648e-22	Xrra1
ENSMUSG00000024399	897.523	-3.02525	0.296499	-10.2032	1.91758e-24	2.78571e-22	Ltb
ENSMUSG00000032122	698.156	-2.10686	0.206745	-10.1906	2.18416e-24	3.13932e-22	Slc37a2
ENSMUSG00000005986	245.236	-1.44881	0.142639	-10.1572	3.07835e-24	4.37339e-22	Ankrd13d
ENSMUSG00000085747	21.7183	-6.65576	0.657415	-10.1241	4.31767e-24	6.03931e-22	Slc13a2os
ENSMUSG00000034584	12.6985	-4.04197	0.402598	-10.0397	1.01973e-23	1.3847e-21	Exph5
ENSMUSG00000019789	11.324	-3.13807	0.313008	-10.0255	1.17734e-23	1.58124e-21	Hey2
ENSMUSG00000030337	2293.72	-2.46422	0.247688	-9.94889	2.55023e-23	3.35184e-21	Vamp1
ENSMUSG00000032816	79.4926	-3.11839	0.313525	-9.94621	2.61961e-23	3.42472e-21	Igdcc4
ENSMUSG00000076762	9.86232	-5.9185	0.59525	-9.94288	2.70887e-23	3.52267e-21	Trav6-1
ENSMUSG00000027562	101.425	-3.54345	0.356407	-9.94214	2.729e-23	3.53018e-21	Car2
ENSMUSG00000100781	5.46582	-6.12655	0.616622	-9.93566	2.9124e-23	3.74769e-21	Gm29481
ENSMUSG00000037660	6.94163	-5.82728	0.586711	-9.9321	3.0182e-23	3.8636e-21	Gdf7
ENSMUSG00000025469	13.1049	-5.38965	0.542987	-9.92593	3.21101e-23	4.06805e-21	Msx3
ENSMUSG00000001366	857.078	-0.863354	0.087048	-9.91814	3.4716e-23	4.37563e-21	Fbxo9
ENSMUSG00000027534	83.0872	-1.34097	0.135393	-9.90424	3.99003e-23	4.97802e-21	Snx16
ENSMUSG00000090782	12.4099	-5.35536	0.542382	-9.87378	5.40866e-23	6.6801e-21	Traj60
ENSMUSG00000086889	56.6527	-2.15378	0.218295	-9.86641	5.82112e-23	7.15358e-21	Phf2os1
ENSMUSG00000028523	168.762	-4.54776	0.460958	-9.86588	5.85177e-23	7.15547e-21	Tctex1d1
ENSMUSG00000104040	9.68399	-5.8955	0.598339	-9.8531	6.64611e-23	8.04671e-21	Gm37563
ENSMUSG00000027171	22.2834	-4.30713	0.43757	-9.84329	7.32715e-23	8.78472e-21	Prrg4
ENSMUSG00000043668	13.6446	-5.60341	0.569325	-9.84219	7.4083e-23	8.83889e-21	Tox3
ENSMUSG00000095426	11.402	-5.92213	0.602107	-9.83568	7.90306e-23	9.38364e-21	Trav6d-5
ENSMUSG00000104002	54.9102	-1.74128	0.177047	-9.83515	7.94502e-23	9.38811e-21	Gm38336
ENSMUSG00000040746	2204.46	-1.60888	0.164194	-9.79864	1.14107e-22	1.34188e-20	Rnf167
ENSMUSG00000005417	6425.72	-1.16762	0.119269	-9.7898	1.24543e-22	1.45072e-20	Mprip
ENSMUSG00000074912	24.5628	-4.14447	0.425225	-9.74654	1.90864e-22	2.19208e-20	Gm14207
ENSMUSG00000018983	5701.14	-1.86792	0.191727	-9.7426	1.98409e-22	2.26814e-20	E2f2
ENSMUSG00000050106	1156.17	-1.91217	0.196319	-9.74016	2.03228e-22	2.31247e-20	Tmc8
ENSMUSG00000026737	2895.93	-1.56922	0.16112	-9.73943	2.04703e-22	2.31852e-20	Pip4k2a
ENSMUSG00000109508	5.10391	-6.02725	0.619875	-9.72333	2.39803e-22	2.70361e-20	Gm44956
ENSMUSG00000110123	154.314	-2.94877	0.303517	-9.71534	2.59389e-22	2.91108e-20	Gm18562
ENSMUSG00000042388	14.9856	-3.61557	0.37342	-9.68233	3.58463e-22	3.9686e-20	Dlgap3
ENSMUSG00000051969	42.1982	-3.52259	0.36494	-9.6525	4.79696e-22	5.28698e-20	Tlr11
ENSMUSG00000028669	1750.59	-1.10252	0.114261	-9.64916	4.956e-22	5.43789e-20	Pithd1
ENSMUSG00000002222	15298.8	-2.40152	0.249544	-9.62363	6.35495e-22	6.91115e-20	Rmnd5a
ENSMUSG00000102600	62.5831	-2.15514	0.224282	-9.60905	7.32248e-22	7.82487e-20	Gm37266
ENSMUSG00000047227	19.3645	-2.22925	0.233286	-9.55589	1.22521e-21	1.29798e-19	Gm527
ENSMUSG00000021477	19364.1	-2.94917	0.310412	-9.50085	2.0819e-21	2.17741e-19	Ctsl
ENSMUSG00000057069	389.629	-2.45154	0.258356	-9.48901	2.33238e-21	2.41878e-19	Ero1lb
ENSMUSG00000040649	9.19373	-4.58644	0.484406	-9.46819	2.84743e-21	2.94051e-19	Rimklb
ENSMUSG00000022504	326.167	-3.09436	0.327748	-9.44127	3.68278e-21	3.75582e-19	Ciita
ENSMUSG00000059674	829.171	-2.75582	0.291919	-9.44036	3.71493e-21	3.77296e-19	Cdh24
ENSMUSG00000011832	545.035	-1.93368	0.2049	-9.43719	3.82918e-21	3.87299e-19	Evi5l
ENSMUSG00000037735	11.6751	-3.62179	0.383912	-9.43391	3.95093e-21	3.97975e-19	2810032G03Rik
ENSMUSG00000052087	1348.15	-1.7463	0.185571	-9.41042	4.94138e-21	4.95711e-19	Rgs14
ENSMUSG00000050592	2791.87	-1.7196	0.183105	-9.39128	5.92748e-21	5.85917e-19	Fam78a
ENSMUSG00000031822	3366.4	-1.69426	0.180496	-9.38667	6.19246e-21	6.08793e-19	Gse1
ENSMUSG00000076924	19.6941	-3.89251	0.415502	-9.36821	7.37729e-21	7.22387e-19	Traj4
ENSMUSG00000053835	189.8	-2.56523	0.274057	-9.36021	7.95753e-21	7.70001e-19	H2-T24
ENSMUSG00000050394	44.6911	-3.59632	0.384319	-9.35765	8.1531e-21	7.85831e-19	Armcx6
ENSMUSG00000022895	4889	-2.80348	0.299703	-9.3542	8.42377e-21	8.056e-19	Ets2
ENSMUSG00000032418	1963.1	-6.09287	0.652197	-9.34208	9.44638e-21	8.96421e-19	Me1
ENSMUSG00000020882	142.814	-2.22552	0.238523	-9.33042	1.05447e-20	9.96801e-19	Cacnb1
ENSMUSG00000061769	4.52586	-5.63816	0.605048	-9.31854	1.17954e-20	1.11075e-18	Klra6
ENSMUSG00000085969	4.85024	-5.74824	0.618432	-9.29486	1.474e-20	1.38274e-18	Gm15600
ENSMUSG00000041444	100.011	-2.95336	0.31786	-9.29138	1.52301e-20	1.42329e-18	Arhgap32
ENSMUSG00000000617	9.97294	-5.72011	0.6195	-9.23343	2.62099e-20	2.42176e-18	Grm6
ENSMUSG00000055108	8.85269	-5.33372	0.578022	-9.22753	2.76945e-20	2.54934e-18	Phxr2
ENSMUSG00000033460	111.683	-3.27049	0.354554	-9.22423	2.85596e-20	2.61917e-18	Armcx1
ENSMUSG00000007659	2116.33	-2.24626	0.245152	-9.1627	5.06153e-20	4.50733e-18	Bcl2l1
ENSMUSG00000020599	15.0895	-3.6994	0.403851	-9.1603	5.17552e-20	4.57568e-18	Rgs9
ENSMUSG00000085827	5.87016	-5.80246	0.633471	-9.15979	5.19979e-20	4.58067e-18	Gm11290
ENSMUSG00000027519	1373.36	-0.781747	0.0858092	-9.11029	8.2162e-20	7.1864e-18	Rab22a
ENSMUSG00000010122	7.05676	-5.41282	0.595177	-9.09447	9.5052e-20	8.25508e-18	Slc47a1
ENSMUSG00000106588	4.21324	-5.74651	0.633346	-9.07326	1.1551e-19	9.92659e-18	Gm17590
ENSMUSG00000109559	8.54143	-5.2821	0.582274	-9.07151	1.17382e-19	1.00523e-17	Gm34280
ENSMUSG00000036356	72.3203	-2.73636	0.301769	-9.06772	1.21529e-19	1.03354e-17	Csgalnact1
ENSMUSG00000003031	1721.53	-1.95572	0.216069	-9.05135	1.41212e-19	1.19268e-17	Cdkn1b
ENSMUSG00000063286	333.719	-3.3653	0.372239	-9.0407	1.55679e-19	1.30589e-17	Gm8995
ENSMUSG00000041187	2358.18	-1.49792	0.165714	-9.03919	1.57832e-19	1.31946e-17	Prkd2
ENSMUSG00000045165	2302	-1.40877	0.156003	-9.03041	1.71031e-19	1.41536e-17	AI467606
ENSMUSG00000061815	22.7699	-3.62355	0.401915	-9.01571	1.95603e-19	1.60787e-17	Rufy4
ENSMUSG00000076919	7.77819	-3.98144	0.442041	-9.00694	2.11888e-19	1.73593e-17	Traj9
ENSMUSG00000029561	140.476	-3.18449	0.353988	-8.99605	2.33993e-19	1.90434e-17	Oasl2
ENSMUSG00000042903	1001.56	-0.99531	0.110663	-8.99404	2.38309e-19	1.9267e-17	Foxo4
ENSMUSG00000094626	9.98523	-4.61453	0.513112	-8.99323	2.40076e-19	1.9283e-17	Cecr6
ENSMUSG00000034761	413.149	-2.30399	0.256191	-8.99326	2.39998e-19	1.9283e-17	Map4k5
ENSMUSG00000114937	19.9923	-3.63472	0.404273	-8.99076	2.45516e-19	1.96556e-17	AC121801,1
ENSMUSG00000044594	23.3079	-6.58028	0.732269	-8.98615	2.56044e-19	2.0432e-17	Serpinb3a
ENSMUSG00000050936	21.7727	-3.04718	0.33912	-8.98556	2.57427e-19	2.04759e-17	Gm42743
ENSMUSG00000035868	55.4293	-1.49294	0.166352	-8.9746	2.84387e-19	2.25473e-17	Zfp983
ENSMUSG00000101013	114.734	-1.30186	0.145351	-8.95664	3.34721e-19	2.63679e-17	A630072M18Rik
ENSMUSG00000033763	216.715	-2.67744	0.299049	-8.95316	3.45454e-19	2.71264e-17	Mtss1l
ENSMUSG00000040724	271.049	-2.04848	0.228979	-8.94614	3.68136e-19	2.88155e-17	Kcna2
ENSMUSG00000020484	1450.61	-1.52877	0.171493	-8.91445	4.90242e-19	3.82513e-17	Xbp1
ENSMUSG00000027739	295.591	-0.72679	0.0815347	-8.91388	4.92779e-19	3.83276e-17	Rab33b
ENSMUSG00000030748	1851.98	-2.21567	0.24874	-8.90758	5.21585e-19	4.0313e-17	Il4ra
ENSMUSG00000109325	29.2047	-4.18148	0.469781	-8.90093	5.53825e-19	4.25372e-17	Krt8-ps
ENSMUSG00000060509	65.0585	-4.02007	0.451987	-8.89422	5.88337e-19	4.49073e-17	Xcr1
ENSMUSG00000020015	1824.6	-1.79314	0.201816	-8.88505	6.38945e-19	4.86191e-17	Cdk17
ENSMUSG00000051041	93.5846	-3.00271	0.338277	-8.87646	6.90193e-19	5.21956e-17	Olfml1
ENSMUSG00000045098	1608.48	-1.15828	0.130585	-8.87	7.31465e-19	5.49784e-17	Kmt5b
ENSMUSG00000031613	200.738	-3.56678	0.402179	-8.86865	7.40361e-19	5.54774e-17	Hpgd
ENSMUSG00000058192	115.505	-1.16809	0.131735	-8.86695	7.51747e-19	5.61594e-17	Zfp846
ENSMUSG00000103126	8.21395	-3.44855	0.389115	-8.86256	7.81944e-19	5.82383e-17	Gm37387
ENSMUSG00000004661	603.748	-1.9513	0.220198	-8.86156	7.89011e-19	5.8587e-17	Arid3b
ENSMUSG00000096746	9.03294	-5.3692	0.606868	-8.84739	8.95894e-19	6.5926e-17	Trav7d-3
ENSMUSG00000021678	58.0572	-3.64526	0.412238	-8.8426	9.35126e-19	6.86075e-17	F2rl1
ENSMUSG00000028657	2218.39	-1.43484	0.162297	-8.84079	9.50422e-19	6.95223e-17	Ppt1
ENSMUSG00000034813	9.16208	-3.98758	0.451073	-8.8402	9.55492e-19	6.96857e-17	Grip1
ENSMUSG00000030361	9.47972	-3.24973	0.367718	-8.83756	9.78282e-19	7.11367e-17	Klrb1a
ENSMUSG00000076927	23.3989	-4.15181	0.470304	-8.82793	1.06633e-18	7.68568e-17	Traj1
ENSMUSG00000076759	20.4866	-3.29845	0.373871	-8.82244	1.11992e-18	8.04837e-17	Trav2
ENSMUSG00000103378	116.474	-2.19921	0.249581	-8.81162	1.23347e-18	8.73666e-17	Gm37176
ENSMUSG00000044641	49.9605	-1.63235	0.185283	-8.81003	1.25111e-18	8.83612e-17	Pard6b
ENSMUSG00000073421	4829.27	-2.25711	0.256416	-8.80253	1.33769e-18	9.42058e-17	H2-Ab1
ENSMUSG00000071335	6.69288	-3.7415	0.425232	-8.79871	1.38392e-18	9.69059e-17	Mfsd4b3
ENSMUSG00000038319	690.635	-2.57311	0.292874	-8.78572	1.5537e-18	1.07569e-16	Kcnh2
ENSMUSG00000097354	173.771	-2.42962	0.277012	-8.7708	1.77401e-18	1.22476e-16	2310001H17Rik
ENSMUSG00000095646	8.62304	-5.11779	0.583857	-8.76548	1.85982e-18	1.27328e-16	Trav10n
ENSMUSG00000069808	120.037	-1.57481	0.179797	-8.75883	1.97287e-18	1.34319e-16	Fam57a
ENSMUSG00000010025	1053.12	-1.06507	0.12172	-8.75021	2.12965e-18	1.43798e-16	Aldh3a2
ENSMUSG00000025083	93.6424	-2.71896	0.310904	-8.74534	2.22344e-18	1.4972e-16	Afap1l2
ENSMUSG00000102154	12.4542	-4.34159	0.496524	-8.74397	2.25054e-18	1.50545e-16	Gm37469
ENSMUSG00000041264	2119.34	-1.09348	0.125055	-8.74397	2.25052e-18	1.50545e-16	Uspl1
ENSMUSG00000110279	302.592	-2.80167	0.320531	-8.74071	2.31646e-18	1.53461e-16	Gm45552
ENSMUSG00000108037	31.1555	-1.77865	0.203537	-8.7387	2.3581e-18	1.55799e-16	Gm44597
ENSMUSG00000027309	477.913	-2.52476	0.289528	-8.72026	2.77555e-18	1.824e-16	4930402H24Rik
ENSMUSG00000040128	1859.46	-0.974234	0.111836	-8.71124	3.00568e-18	1.96996e-16	Pnrc1
ENSMUSG00000046589	15.2533	-2.47985	0.284865	-8.70535	3.16591e-18	2.06309e-16	Lrrc8e
ENSMUSG00000076478	46.188	-5.94594	0.683162	-8.70356	3.2164e-18	2.08582e-16	Trbv23
ENSMUSG00000102324	13.785	-2.2276	0.255996	-8.70171	3.26929e-18	2.11454e-16	Gm19721
ENSMUSG00000035270	19.9558	-2.80824	0.323386	-8.68386	3.82562e-18	2.46141e-16	Impg2
ENSMUSG00000016496	527.313	-2.12168	0.244573	-8.67506	4.13337e-18	2.64558e-16	Cd274
ENSMUSG00000076875	5.21258	-5.19081	0.598459	-8.67362	4.18587e-18	2.67221e-16	Traj58
ENSMUSG00000038390	843.439	-3.07478	0.354823	-8.66566	4.48902e-18	2.85832e-16	Gpr162
ENSMUSG00000036960	8.60348	-3.5034	0.404717	-8.65641	4.8687e-18	3.08409e-16	Clca2
ENSMUSG00000021573	120.923	-4.06461	0.469718	-8.6533	5.00312e-18	3.1611e-16	Tppp
ENSMUSG00000042622	96.1168	-2.1299	0.246666	-8.63474	5.88599e-18	3.70938e-16	Maff
ENSMUSG00000107049	7.9003	-3.17174	0.367741	-8.62495	6.4123e-18	4.02045e-16	Gm43771
ENSMUSG00000076915	7.75733	-3.69832	0.429508	-8.6106	7.26821e-18	4.5455e-16	Traj14
ENSMUSG00000022211	53.3331	-3.6986	0.429585	-8.60969	7.3257e-18	4.56982e-16	Carmil3
ENSMUSG00000043263	189.252	-2.59221	0.301179	-8.60688	7.50784e-18	4.67159e-16	Ifi209
ENSMUSG00000035686	2691.17	-6.8655	0.798754	-8.59526	8.30752e-18	5.14313e-16	Thrsp
ENSMUSG00000024059	206.191	-3.57756	0.41663	-8.5869	8.93509e-18	5.50683e-16	Clip4
ENSMUSG00000114835	32.2559	-1.44075	0.167786	-8.58683	8.9398e-18	5.50683e-16	AC125350,5
ENSMUSG00000038065	457.168	-3.01775	0.351782	-8.57848	9.61336e-18	5.90693e-16	Mturn
ENSMUSG00000027805	127.089	-2.92271	0.340715	-8.57816	9.64032e-18	5.90872e-16	Pfn2
ENSMUSG00000057715	17.5403	-4.38753	0.511496	-8.57783	9.6678e-18	5.91083e-16	A830018L16Rik
ENSMUSG00000026639	154.962	-2.78664	0.325025	-8.57362	1.00285e-17	6.11613e-16	Lamb3
ENSMUSG00000076926	33.1985	-4.2084	0.491015	-8.57083	1.02744e-17	6.23516e-16	Traj2
ENSMUSG00000028037	170.303	-3.13746	0.366143	-8.56894	1.04439e-17	6.32239e-16	Ifi44
ENSMUSG00000047866	1528.27	-1.03904	0.121359	-8.56166	1.11252e-17	6.71829e-16	Lonp2
ENSMUSG00000096921	6.8887	-4.76079	0.556177	-8.55986	1.13005e-17	6.80742e-16	Gm26822
ENSMUSG00000038816	270.404	-2.72024	0.31786	-8.55799	1.14854e-17	6.90193e-16	Ctnnal1
ENSMUSG00000031258	148.987	-3.6541	0.42706	-8.55641	1.16439e-17	6.96309e-16	Xkrx
ENSMUSG00000094792	6.57754	-4.68695	0.547947	-8.55365	1.19258e-17	7.11439e-16	Trav10d
ENSMUSG00000038241	3748.48	-1.31001	0.153217	-8.54999	1.23094e-17	7.32546e-16	Cep250
ENSMUSG00000026601	263.816	-2.55428	0.2988	-8.54846	1.24739e-17	7.40543e-16	Axdnd1
ENSMUSG00000042641	7.60616	-3.11957	0.364954	-8.54785	1.25407e-17	7.42714e-16	Rgsl1
ENSMUSG00000032358	7.59259	-4.91696	0.575465	-8.54431	1.29304e-17	7.62116e-16	Fam83b
ENSMUSG00000109002	256.179	-3.5268	0.413644	-8.52617	1.51272e-17	8.8313e-16	Gm38405
ENSMUSG00000022708	585.135	-2.7217	0.319417	-8.52084	1.58398e-17	9.22538e-16	Zbtb20
ENSMUSG00000028522	3301.6	-2.08433	0.244883	-8.51153	1.7165e-17	9.92663e-16	Mier1
ENSMUSG00000036617	122.687	-2.45255	0.288278	-8.50762	1.77546e-17	1.02435e-15	Etl4
ENSMUSG00000030156	366.07	-3.62689	0.426478	-8.50429	1.82714e-17	1.0517e-15	Cd69
ENSMUSG00000041775	240.713	-1.18649	0.139597	-8.4994	1.90575e-17	1.09438e-15	Mapk1ip1
ENSMUSG00000022639	47.7189	-2.49357	0.293689	-8.49053	2.05698e-17	1.17847e-15	Dubr
ENSMUSG00000031910	28.2662	-2.8248	0.332826	-8.4873	2.11486e-17	1.20881e-15	Has3
ENSMUSG00000029385	2650.33	-1.43257	0.168919	-8.48082	2.23617e-17	1.27519e-15	Ccng2
ENSMUSG00000024846	52.9996	-3.10562	0.366285	-8.4787	2.27729e-17	1.29563e-15	Cst6
ENSMUSG00000048706	49.6304	-2.92113	0.34524	-8.46116	2.64727e-17	1.49918e-15	Lurap1l
ENSMUSG00000061601	55.9132	-4.30495	0.509003	-8.45762	2.72901e-17	1.54192e-15	Pclo
ENSMUSG00000029832	90.1258	-3.18319	0.376953	-8.44452	3.05301e-17	1.71709e-15	Nfe2l3
ENSMUSG00000047986	15.5132	-3.46269	0.410568	-8.43392	3.34271e-17	1.86721e-15	Palm3
ENSMUSG00000045348	707.316	-2.41266	0.286107	-8.43273	3.37685e-17	1.882e-15	Nyap1
ENSMUSG00000060402	19.884	-3.59196	0.426188	-8.4281	3.51313e-17	1.95352e-15	Chst8
ENSMUSG00000024642	240.708	-2.86009	0.339916	-8.41412	3.95871e-17	2.18155e-15	Tle4
ENSMUSG00000038415	15.2958	-3.33801	0.396848	-8.41129	4.05517e-17	2.22971e-15	Foxq1
ENSMUSG00000040859	736.416	-0.938613	0.11176	-8.39851	4.52188e-17	2.46975e-15	Bsdc1
ENSMUSG00000026832	1633.33	-2.20099	0.262132	-8.39647	4.60083e-17	2.5073e-15	Cytip
ENSMUSG00000020097	2344.26	-1.62536	0.194071	-8.37508	5.51877e-17	2.98767e-15	Sgpl1
ENSMUSG00000101089	31.6664	-4.75692	0.568853	-8.36231	6.1504e-17	3.30054e-15	2610016A17Rik
ENSMUSG00000045573	66.1088	-4.18896	0.500963	-8.36182	6.17562e-17	3.30685e-15	Penk
ENSMUSG00000014353	595.741	-1.10063	0.131709	-8.35656	6.45722e-17	3.45012e-15	Tmem87b
ENSMUSG00000025175	77.3673	-2.4934	0.298561	-8.3514	6.74607e-17	3.58885e-15	Fn3k
ENSMUSG00000030123	4898.79	-2.44966	0.293322	-8.35144	6.74368e-17	3.58885e-15	Plxnd1
ENSMUSG00000028088	101.343	-2.43181	0.291198	-8.35105	6.7656e-17	3.59147e-15	Fmo5
ENSMUSG00000028386	188.081	-6.34092	0.759433	-8.34954	6.85288e-17	3.62996e-15	Slc46a2
ENSMUSG00000026188	7.54453	-4.54904	0.544914	-8.34818	6.93241e-17	3.65854e-15	Tmem169
ENSMUSG00000045094	18.8364	-3.10074	0.37143	-8.34811	6.93661e-17	3.65854e-15	Arhgef37
ENSMUSG00000089687	9.29617	-2.32724	0.278928	-8.3435	7.21254e-17	3.79593e-15	Rab42
ENSMUSG00000103285	16.4598	-2.31258	0.277377	-8.33731	7.60028e-17	3.98294e-15	Gm37274
ENSMUSG00000027078	119.097	-2.05094	0.246512	-8.31984	8.80852e-17	4.57708e-15	Ube2l6
ENSMUSG00000022659	26.6077	-3.18934	0.383412	-8.31829	8.92428e-17	4.62745e-15	Gcsam
ENSMUSG00000071856	32.7727	-2.96678	0.356678	-8.31782	8.95987e-17	4.63612e-15	Mcc
ENSMUSG00000097705	11.1552	-3.409	0.410091	-8.31278	9.34873e-17	4.82717e-15	Gm26740
ENSMUSG00000032649	14.3585	-3.04256	0.366263	-8.30704	9.81214e-17	5.04524e-15	Colgalt2
ENSMUSG00000106768	30.4553	-3.5722	0.43021	-8.30339	1.01183e-16	5.19183e-15	4930480C01Rik
ENSMUSG00000087654	6.40914	-4.86979	0.586736	-8.2998	1.04284e-16	5.33976e-15	Gm12256
ENSMUSG00000000305	142.86	-4.27878	0.515654	-8.29778	1.06079e-16	5.4204e-15	Cdh4
ENSMUSG00000047867	3129.54	-1.87806	0.226798	-8.28078	1.22371e-16	6.20132e-15	Gimap6
ENSMUSG00000033781	449.377	-0.863925	0.10443	-8.27281	1.30842e-16	6.61693e-15	Asb13
ENSMUSG00000045104	42.6163	-1.59869	0.193286	-8.27108	1.32747e-16	6.69949e-15	Gm5514
ENSMUSG00000044667	31.4525	-3.77534	0.456511	-8.26999	1.33972e-16	6.74747e-15	Plppr4
ENSMUSG00000030747	1949.35	-5.60756	0.67949	-8.25259	1.54993e-16	7.78273e-15	Dgat2
ENSMUSG00000047658	10.3991	-4.07447	0.493728	-8.25246	1.55161e-16	7.78273e-15	Gal3st3
ENSMUSG00000025915	320.169	-3.0335	0.368011	-8.24295	1.68018e-16	8.41047e-15	Sgk3
ENSMUSG00000049659	1582.2	-1.05181	0.127649	-8.23985	1.72421e-16	8.61335e-15	Aftph
ENSMUSG00000050063	4.91842	-5.32659	0.646585	-8.23804	1.75061e-16	8.72747e-15	Klk6
ENSMUSG00000022848	565.287	-1.98575	0.24111	-8.23586	1.7827e-16	8.86945e-15	Dirc2
ENSMUSG00000051367	127.832	-3.64277	0.442478	-8.23265	1.83119e-16	9.09233e-15	Six1
ENSMUSG00000030256	222.017	-3.13682	0.381057	-8.23189	1.84276e-16	9.13134e-15	Bhlhe41
ENSMUSG00000086862	27.2213	-3.08469	0.374913	-8.22776	1.90745e-16	9.43287e-15	Gm13546
ENSMUSG00000042428	249.316	-3.45512	0.420047	-8.22555	1.94304e-16	9.58957e-15	Mgat3
ENSMUSG00000020346	1967.42	-0.807377	0.0982084	-8.22106	2.01713e-16	9.93527e-15	Mgat1
ENSMUSG00000040540	17.6022	-2.32498	0.283187	-8.21005	2.21094e-16	1.07605e-14	Gm9770
ENSMUSG00000026980	1477.62	-2.05139	0.249887	-8.20927	2.22531e-16	1.0809e-14	Ly75
ENSMUSG00000047462	27.3948	-3.69969	0.450878	-8.20553	2.29585e-16	1.11078e-14	A530099J19Rik
ENSMUSG00000032528	91.6601	-2.74708	0.33482	-8.20465	2.31257e-16	1.11667e-14	Vipr1
ENSMUSG00000045629	71.16	-2.98624	0.364024	-8.20342	2.33648e-16	1.1238e-14	Sh3tc2
ENSMUSG00000027706	1431.47	-0.717294	0.0874683	-8.20062	2.39159e-16	1.143e-14	Sec62
ENSMUSG00000021745	223.741	-2.84744	0.347345	-8.19773	2.44972e-16	1.16459e-14	Ptprg
ENSMUSG00000108181	23.2805	-1.66418	0.203026	-8.19689	2.4669e-16	1.17049e-14	C030015A19Rik
ENSMUSG00000027589	1085.03	-1.74625	0.213368	-8.18422	2.74069e-16	1.2954e-14	Pcmtd2
ENSMUSG00000024421	171.611	-3.68401	0.450199	-8.18307	2.76695e-16	1.3053e-14	Lama3
ENSMUSG00000027536	21.6022	-3.49519	0.427156	-8.18247	2.78085e-16	1.30934e-14	Chmp4c
ENSMUSG00000109179	98.4225	-1.42577	0.174309	-8.17955	2.84911e-16	1.33892e-14	Gm35339
ENSMUSG00000059991	16.5751	-4.02941	0.492693	-8.17834	2.87782e-16	1.34983e-14	Nptx2
ENSMUSG00000087410	4.04353	-5.24592	0.641569	-8.1767	2.91725e-16	1.36312e-14	2310065F04Rik
ENSMUSG00000021213	129.225	-2.1363	0.261607	-8.16608	3.18585e-16	1.4858e-14	Akr1c13
ENSMUSG00000030173	7.27569	-3.90583	0.478571	-8.16144	3.31056e-16	1.54104e-14	Klra5
ENSMUSG00000066026	1270.27	-2.44299	0.299349	-8.16102	3.32209e-16	1.54349e-14	Dhrs3
ENSMUSG00000022577	10.0206	-4.28722	0.525867	-8.15267	3.55979e-16	1.6508e-14	Ly6h
ENSMUSG00000034165	13066.2	-1.87171	0.229651	-8.15025	3.63158e-16	1.68092e-14	Ccnd3
ENSMUSG00000027882	588.591	-1.28661	0.157952	-8.14557	3.77487e-16	1.74396e-14	Stxbp3
ENSMUSG00000041653	231.512	-6.37424	0.782602	-8.14493	3.79505e-16	1.74889e-14	Pnpla3
ENSMUSG00000090157	33.751	-3.53838	0.435212	-8.13023	4.28459e-16	1.96102e-14	Gm16534
ENSMUSG00000034247	1008.29	-0.987307	0.121479	-8.12736	4.38753e-16	2.0044e-14	Plekhm1
ENSMUSG00000021286	213.972	-1.42146	0.17501	-8.12221	4.57787e-16	2.08748e-14	Zfyve21
ENSMUSG00000029851	158.732	-3.82799	0.471707	-8.11517	4.85097e-16	2.20383e-14	Tcaf2
ENSMUSG00000107271	136.32	-4.20673	0.518516	-8.11302	4.93752e-16	2.23901e-14	BC028471
ENSMUSG00000015944	235.101	-2.00777	0.247554	-8.11047	5.04264e-16	2.28247e-14	Gatsl2
ENSMUSG00000050640	52.7721	-4.08672	0.504043	-8.10788	5.15094e-16	2.3272e-14	Tmem150c
ENSMUSG00000027130	1115.19	-1.52938	0.188637	-8.10755	5.16517e-16	2.32935e-14	Slc12a6
ENSMUSG00000060240	6.75439	-3.34848	0.413331	-8.10122	5.44126e-16	2.43598e-14	Cend1
ENSMUSG00000076760	22.2905	-4.0381	0.49867	-8.09775	5.59866e-16	2.50189e-14	Trav3-1
ENSMUSG00000026621	47.9995	-5.36517	0.662767	-8.09511	5.7212e-16	2.54739e-14	2001-03-01
ENSMUSG00000090990	4.88416	-5.09478	0.629399	-8.09467	5.7419e-16	2.55198e-14	Gm17197
ENSMUSG00000053216	5.51871	-3.94871	0.487893	-8.0934	5.80215e-16	2.5741e-14	Btn2a2
ENSMUSG00000025964	106.807	-2.11149	0.26112	-8.08631	6.15013e-16	2.72357e-14	Adam23
ENSMUSG00000035713	142.054	-2.36602	0.292761	-8.08175	6.38442e-16	2.82224e-14	Usp35
ENSMUSG00000034855	116.302	-4.29442	0.53199	-8.07236	6.89526e-16	3.03713e-14	Cxcl10
ENSMUSG00000037813	7.96519	-4.01642	0.497887	-8.06693	7.20861e-16	3.15817e-14	D630003M21Rik
ENSMUSG00000032802	211.362	-2.87026	0.355858	-8.06575	7.27893e-16	3.1833e-14	Srxn1
ENSMUSG00000035186	532.964	-3.58247	0.444556	-8.05854	7.72139e-16	3.36483e-14	Ubd
ENSMUSG00000031495	27.9027	-4.37173	0.5427	-8.05552	7.9142e-16	3.44275e-14	Cd209d
ENSMUSG00000068587	36.5154	-4.17399	0.518244	-8.05411	8.00615e-16	3.47659e-14	Mgam
ENSMUSG00000108132	320.43	-4.3705	0.542749	-8.05253	8.11009e-16	3.50933e-14	Gm44175
ENSMUSG00000046794	809.69	-1.81376	0.225253	-8.05213	8.13642e-16	3.51453e-14	Ppp1r3b
ENSMUSG00000078653	27.8831	-2.2802	0.283222	-8.05094	8.21584e-16	3.54261e-14	Cntd1
ENSMUSG00000090100	460.156	-1.58987	0.1975	-8.04997	8.2815e-16	3.56467e-14	Ttbk2
ENSMUSG00000033060	139.567	-2.88354	0.358456	-8.04434	8.6713e-16	3.72593e-14	Lmo7
ENSMUSG00000090206	6.04743	-4.22908	0.526323	-8.03514	9.34719e-16	4.00934e-14	Tepp
ENSMUSG00000010660	110.529	-2.81481	0.35041	-8.03291	9.51898e-16	4.07592e-14	Plcd1
ENSMUSG00000030745	1657.09	-2.12293	0.264347	-8.03087	9.67838e-16	4.13696e-14	Il21r
ENSMUSG00000000276	1207.48	-1.80521	0.22479	-8.03065	9.69608e-16	4.13733e-14	Dgke
ENSMUSG00000034818	10.4426	-2.89308	0.360706	-8.0206	1.05226e-15	4.48221e-14	Celf5
ENSMUSG00000062524	4.30894	-5.32929	0.66568	-8.00579	1.18703e-15	4.99569e-14	Ncr1
ENSMUSG00000029287	370.686	-2.00515	0.250954	-7.99009	1.3484e-15	5.63622e-14	Tgfbr3
ENSMUSG00000087283	3.0328	-5.0485	0.632533	-7.98141	1.44674e-15	6.01657e-14	Gm13580
ENSMUSG00000034435	39.4588	-3.96281	0.496653	-7.97904	1.47471e-15	6.12252e-14	Tmem30b
ENSMUSG00000076922	17.4935	-3.69106	0.462656	-7.97797	1.48755e-15	6.16541e-14	Traj6
ENSMUSG00000022106	3749.34	-1.73374	0.217347	-7.97686	1.50104e-15	6.20042e-14	Rcbtb2
ENSMUSG00000024581	631.66	-0.806981	0.101178	-7.97582	1.51367e-15	6.2421e-14	Napg
ENSMUSG00000037169	16.3333	-4.2852	0.537518	-7.9722	1.5588e-15	6.40671e-14	Mycn
ENSMUSG00000048988	26.4133	-4.01257	0.503508	-7.96922	1.59683e-15	6.55206e-14	Elfn1
ENSMUSG00000020042	124.405	-4.1823	0.524871	-7.96824	1.60953e-15	6.59316e-14	Btbd11
ENSMUSG00000071342	46.8022	-4.02506	0.505227	-7.96682	1.62808e-15	6.65808e-14	Lsmem1
ENSMUSG00000032184	75.5294	-2.56317	0.322279	-7.95327	1.8165e-15	7.40398e-14	Lysmd2
ENSMUSG00000030849	118.356	-3.23486	0.406812	-7.95175	1.83897e-15	7.48315e-14	Fgfr2
ENSMUSG00000040729	17.4067	-3.35725	0.42248	-7.94654	1.91788e-15	7.79133e-14	Cep126
ENSMUSG00000038668	102.003	-2.15227	0.271002	-7.94189	1.99119e-15	8.07581e-14	Lpar1
ENSMUSG00000000538	826.356	-1.0435	0.13147	-7.93717	2.06855e-15	8.34823e-14	Tom1l2
ENSMUSG00000003992	1992.69	-1.41216	0.178044	-7.93153	2.16455e-15	8.70709e-14	Ssbp2
ENSMUSG00000027829	2283.91	-0.722242	0.0910984	-7.92815	2.22428e-15	8.90365e-14	Ccnl1
ENSMUSG00000039086	159.819	-1.1382	0.143602	-7.92612	2.261e-15	9.02587e-14	Ss18l1
ENSMUSG00000112082	6.07412	-4.58667	0.579724	-7.91181	2.53682e-15	1.0036e-13	AC101882,1
ENSMUSG00000037697	521.166	-0.839832	0.106513	-7.88476	3.15135e-15	1.23565e-13	Ddhd1
ENSMUSG00000049493	57.4356	-3.99838	0.507519	-7.87828	3.31909e-15	1.29899e-13	Pls1
ENSMUSG00000076907	5.67926	-3.71748	0.472116	-7.87408	3.43249e-15	1.34124e-13	Traj22
ENSMUSG00000024462	942.07	-3.62686	0.460876	-7.8695	3.56068e-15	1.38692e-13	Gabbr1
ENSMUSG00000031284	24.1338	-3.31478	0.421307	-7.86783	3.60836e-15	1.40105e-13	Pak3
ENSMUSG00000063873	147.443	-4.24915	0.540363	-7.8635	3.73548e-15	1.44584e-13	Slc24a3
ENSMUSG00000113637	56.9574	-5.81738	0.739839	-7.86304	3.74934e-15	1.44892e-13	AC156572,1
ENSMUSG00000042359	40.374	-3.44017	0.438407	-7.84697	4.26194e-15	1.63928e-13	Osbpl6
ENSMUSG00000043003	28.31	-4.67209	0.595688	-7.84319	4.39249e-15	1.68422e-13	Rasef
ENSMUSG00000020990	41.5861	-3.68554	0.470526	-7.8328	4.77127e-15	1.82093e-13	Cdkl1
ENSMUSG00000030465	156.68	-3.0485	0.389421	-7.82828	4.94588e-15	1.88465e-13	Psd3
ENSMUSG00000043659	7.76606	-5.34929	0.684	-7.8206	5.25713e-15	1.99398e-13	Npsr1
ENSMUSG00000051504	28.9067	-3.4026	0.435335	-7.81606	5.45038e-15	2.06091e-13	Siglech
ENSMUSG00000061576	57.4527	-3.62354	0.46376	-7.8134	5.5667e-15	2.09844e-13	Dpp6
ENSMUSG00000069237	573.034	-1.04621	0.133955	-7.8101	5.71416e-15	2.14744e-13	Fam8a1
ENSMUSG00000031953	97.1899	-1.74576	0.223702	-7.80393	6.00063e-15	2.25166e-13	Tmem170
ENSMUSG00000000078	689.86	-1.66155	0.21316	-7.79483	6.44953e-15	2.40176e-13	Klf6
ENSMUSG00000046080	23.9282	-2.84807	0.365473	-7.79284	6.55186e-15	2.4325e-13	Clec9a
ENSMUSG00000085417	137.12	-2.54353	0.326496	-7.79038	6.68086e-15	2.47292e-13	Gm13919
ENSMUSG00000040033	1015.12	-0.925831	0.118873	-7.78843	6.78463e-15	2.50379e-13	Stat2
ENSMUSG00000094828	65.5095	-3.66016	0.470282	-7.7829	7.08824e-15	2.60801e-13	Trav3-3
ENSMUSG00000075296	59.2577	-4.34029	0.557866	-7.78016	7.24323e-15	2.65789e-13	Aldh3b2
ENSMUSG00000097924	5.59789	-3.33716	0.429084	-7.7774	7.40297e-15	2.70759e-13	A730020E08Rik
ENSMUSG00000051497	37.6269	-4.15596	0.535777	-7.75689	8.70407e-15	3.15995e-13	Kcnj16
ENSMUSG00000034460	30.801	-3.2517	0.419329	-7.75454	8.86667e-15	3.2095e-13	Six4
ENSMUSG00000106497	5.68897	-3.36734	0.4347	-7.74635	9.45732e-15	3.41827e-13	Gm43195
ENSMUSG00000024163	1977.59	-0.646625	0.0834919	-7.74476	9.57656e-15	3.45121e-13	Mapk8ip3
ENSMUSG00000047759	11.4804	-3.13867	0.405728	-7.73589	1.02684e-14	3.67361e-13	Hs3st3a1
ENSMUSG00000018372	658.136	-0.915303	0.118661	-7.71357	1.22349e-14	4.34553e-13	Cep95
ENSMUSG00000026107	987.122	-3.22044	0.417948	-7.70536	1.30479e-14	4.62092e-13	Nabp1
ENSMUSG00000015316	584.373	-1.83047	0.237583	-7.70453	1.31321e-14	4.64405e-13	Slamf1
ENSMUSG00000046532	87.2127	-2.98561	0.387696	-7.7009	1.35109e-14	4.77115e-13	Ar
ENSMUSG00000028434	118.736	-4.02527	0.523273	-7.69249	1.44303e-14	5.0667e-13	Epb41l4b
ENSMUSG00000019832	139.18	-1.64788	0.214333	-7.68842	1.48967e-14	5.22298e-13	Rab32
ENSMUSG00000039501	756.57	-1.09858	0.142907	-7.68736	1.50202e-14	5.25129e-13	Znfx1
ENSMUSG00000028654	64.9117	-2.68725	0.350319	-7.67087	1.70835e-14	5.93888e-13	Mycl
ENSMUSG00000062760	88.6938	-4.42369	0.577171	-7.66442	1.79637e-14	6.23604e-13	1810041L15Rik
ENSMUSG00000040940	10768.7	-1.01538	0.132612	-7.65678	1.90649e-14	6.59967e-13	Arhgef1
ENSMUSG00000048249	746.908	-1.55721	0.203384	-7.65648	1.91106e-14	6.60619e-13	Crebrf
ENSMUSG00000032532	5.65903	-4.88278	0.637945	-7.65392	1.94948e-14	6.72009e-13	Cck
ENSMUSG00000041548	210.806	-2.65239	0.346548	-7.65373	1.95233e-14	6.7205e-13	Hspb8
ENSMUSG00000038324	4856.81	-0.810569	0.105967	-7.64927	2.02129e-14	6.93845e-13	Trpc4ap
ENSMUSG00000025129	10.9835	-3.99788	0.522706	-7.64843	2.0344e-14	6.97371e-13	Ppp1r27
ENSMUSG00000038205	216.884	-1.39621	0.182623	-7.64531	2.08437e-14	7.12514e-13	Prkab2
ENSMUSG00000032346	4.90891	-5.10489	0.667753	-7.64488	2.09148e-14	7.13951e-13	Ooep
ENSMUSG00000091712	4.70451	-4.80841	0.630847	-7.62214	2.495e-14	8.45824e-13	Sec14l5
ENSMUSG00000053080	1074.64	-1.1917	0.156391	-7.61998	2.53713e-14	8.58922e-13	2700081O15Rik
ENSMUSG00000029299	905.343	-2.07456	0.272289	-7.61896	2.55728e-14	8.6455e-13	Abcg3
ENSMUSG00000034209	7.34751	-2.73065	0.358837	-7.60972	2.74691e-14	9.24844e-13	Rasl10a
ENSMUSG00000030519	132.164	-5.52409	0.726081	-7.60808	2.78193e-14	9.35352e-13	Apba2
ENSMUSG00000062826	34.2604	-5.33702	0.701611	-7.6068	2.80959e-14	9.43363e-13	Ces2f
ENSMUSG00000076905	5.46514	-3.31337	0.435686	-7.60494	2.85039e-14	9.55756e-13	Traj24
ENSMUSG00000015437	5.51553	-4.63075	0.609377	-7.59915	2.98078e-14	9.96756e-13	Gzmb
ENSMUSG00000020385	1140.15	-0.793672	0.104505	-7.59462	3.08709e-14	1.0295e-12	Clk4
ENSMUSG00000021814	1216.33	-0.984279	0.129605	-7.59443	3.09143e-14	1.02955e-12	Anxa7
ENSMUSG00000020390	1840.55	-0.704443	0.0928338	-7.58822	3.24337e-14	1.0787e-12	Ube2b
ENSMUSG00000005360	244.448	-3.14072	0.414668	-7.57407	3.61722e-14	1.19817e-12	Slc1a3
ENSMUSG00000025932	58.3457	-4.02883	0.532385	-7.56751	3.80437e-14	1.2534e-12	Eya1
ENSMUSG00000001510	5.72144	-4.89169	0.646747	-7.56352	3.92313e-14	1.2908e-12	Dlx3
ENSMUSG00000028399	44.6369	-3.31664	0.438597	-7.56193	3.97127e-14	1.30315e-12	Ptprd
ENSMUSG00000030269	691.807	-0.973827	0.128862	-7.55711	4.1212e-14	1.34875e-12	Mtmr14
ENSMUSG00000025959	719.688	-1.75339	0.23217	-7.55218	4.28019e-14	1.39706e-12	Klf7
ENSMUSG00000037999	713.116	-3.14502	0.416455	-7.55188	4.29007e-14	1.39842e-12	Arap2
ENSMUSG00000054156	2.90281	-4.9816	0.659906	-7.54895	4.3877e-14	1.42757e-12	Gm4894
ENSMUSG00000039395	299.655	-4.78639	0.634085	-7.54851	4.40271e-14	1.42757e-12	Mreg
ENSMUSG00000029032	59.6425	-3.78608	0.501545	-7.54884	4.39139e-14	1.42757e-12	Arhgef16
ENSMUSG00000020826	31.6664	-2.61629	0.346665	-7.54703	4.4528e-14	1.44191e-12	Nos2
ENSMUSG00000078234	162.268	-4.29837	0.56971	-7.54484	4.52834e-14	1.46252e-12	Klhdc7a
ENSMUSG00000074896	170.946	-2.82442	0.374348	-7.54489	4.52683e-14	1.46252e-12	Ifit3
ENSMUSG00000059146	456.332	-2.67451	0.35491	-7.53575	4.85526e-14	1.56399e-12	Ntrk3
ENSMUSG00000059412	289.887	-3.45424	0.458795	-7.52894	5.11532e-14	1.64131e-12	Fxyd2
ENSMUSG00000010651	67.9588	-3.32772	0.442196	-7.52544	5.25433e-14	1.68152e-12	Acaa1b
ENSMUSG00000076909	5.42181	-4.60387	0.611955	-7.52322	5.34418e-14	1.70805e-12	Traj20
ENSMUSG00000087507	2.81195	-4.71852	0.627526	-7.51925	5.5092e-14	1.75623e-12	Gm16141
ENSMUSG00000059588	272.621	-1.79713	0.239033	-7.51831	5.549e-14	1.76662e-12	Calcrl
ENSMUSG00000005534	805.439	-1.06045	0.141078	-7.51678	5.61415e-14	1.78505e-12	Insr
ENSMUSG00000024193	684.491	-1.36549	0.181669	-7.51637	5.63194e-14	1.78839e-12	Phf1
ENSMUSG00000038903	16.07	-2.27195	0.302571	-7.50884	5.96555e-14	1.89189e-12	Ccdc68
ENSMUSG00000028264	12.4749	-3.7504	0.499795	-7.50388	6.19582e-14	1.96238e-12	Spaca1
ENSMUSG00000040413	8.06423	-4.27904	0.570332	-7.50273	6.25026e-14	1.97454e-12	Timd2
ENSMUSG00000006931	140.707	-2.07657	0.276991	-7.4969	6.53431e-14	2.06162e-12	P3h4
ENSMUSG00000076906	5.09931	-3.66622	0.490723	-7.47106	7.95527e-14	2.49076e-12	Traj23
ENSMUSG00000085622	75.8952	-1.30921	0.175466	-7.46136	8.5636e-14	2.67781e-12	3110056K07Rik
ENSMUSG00000020160	51.8882	-2.97009	0.398114	-7.46041	8.62505e-14	2.6936e-12	Meis1
ENSMUSG00000024619	9.9995	-4.58969	0.615574	-7.45595	8.92194e-14	2.78278e-12	Cdx1
ENSMUSG00000066456	111.225	-3.12724	0.419637	-7.45225	9.17621e-14	2.85485e-12	Hmgn3
ENSMUSG00000028300	199.914	-1.63912	0.220017	-7.44994	9.33826e-14	2.90159e-12	3110043O21Rik
ENSMUSG00000113099	2.35	-4.92018	0.663138	-7.41954	1.17526e-13	3.61974e-12	AC124179,1
ENSMUSG00000053044	13637.3	-2.05246	0.276704	-7.41753	1.19326e-13	3.666e-12	Cd8b1
ENSMUSG00000030087	99.1261	-3.20616	0.432743	-7.40893	1.27323e-13	3.89706e-12	Klf15
ENSMUSG00000097006	63.549	-2.29147	0.309365	-7.40701	1.29178e-13	3.94893e-12	9530082P21Rik
ENSMUSG00000029757	45.7611	-5.31515	0.717884	-7.40392	1.32225e-13	4.03204e-12	Dync1i1
ENSMUSG00000049047	135.842	-2.32205	0.31432	-7.38755	1.49554e-13	4.54356e-12	Armcx3
ENSMUSG00000076908	5.93819	-3.54444	0.4804	-7.3781	1.60569e-13	4.86017e-12	Traj21
ENSMUSG00000001741	3385.36	-1.6427	0.222688	-7.37669	1.62276e-13	4.90581e-12	Il16
ENSMUSG00000042333	306.138	-1.81234	0.245705	-7.37609	1.63005e-13	4.9218e-12	Tnfrsf14
ENSMUSG00000036594	4594.65	-2.48214	0.336675	-7.37251	1.6745e-13	5.04981e-12	H2-Aa
ENSMUSG00000035069	349.847	-0.952681	0.129247	-7.371	1.69352e-13	5.09466e-12	Oma1
ENSMUSG00000029552	493.961	-3.50307	0.475326	-7.36982	1.70859e-13	5.12745e-12	Tes
ENSMUSG00000031290	9.40769	-3.32361	0.451649	-7.35884	1.85521e-13	5.55388e-12	Lrch2
ENSMUSG00000035189	11.761	-3.81601	0.518629	-7.35788	1.86855e-13	5.58023e-12	Ano4
ENSMUSG00000055296	605.445	-1.37983	0.187621	-7.35436	1.91843e-13	5.71528e-12	Tmem245
ENSMUSG00000014547	520.623	-1.71766	0.233568	-7.35399	1.9238e-13	5.72435e-12	Wdfy2
ENSMUSG00000018672	177.081	-2.31174	0.314671	-7.34654	2.03408e-13	6.04518e-12	Copz2
ENSMUSG00000022203	84.6707	-2.93578	0.399722	-7.34456	2.06445e-13	6.12063e-12	Efs
ENSMUSG00000022676	24.2395	-2.59736	0.353857	-7.34013	2.13381e-13	6.31866e-12	Snai2
ENSMUSG00000031780	19.0938	-3.37815	0.460344	-7.33832	2.16285e-13	6.39695e-12	Ccl17
ENSMUSG00000026034	2771.6	-0.961111	0.130978	-7.33798	2.16842e-13	6.40571e-12	Clk1
ENSMUSG00000020455	1250.21	-0.992581	0.135356	-7.3331	2.24887e-13	6.61451e-12	Trim11
ENSMUSG00000051036	3.88978	-4.52733	0.617453	-7.33227	2.26285e-13	6.64471e-12	Ttc24
ENSMUSG00000007872	961.473	-2.37601	0.324068	-7.33184	2.27007e-13	6.65796e-12	Id3
ENSMUSG00000046952	475.505	-3.00802	0.410354	-7.33032	2.29612e-13	6.72281e-12	Gm5815
ENSMUSG00000046814	72.5208	-4.02911	0.550104	-7.32427	2.40211e-13	7.01176e-12	Gchfr
ENSMUSG00000001156	492.737	-1.41286	0.193023	-7.31963	2.48662e-13	7.24124e-12	Mxd1
ENSMUSG00000004568	1607	-1.30513	0.178534	-7.31024	2.66659e-13	7.72872e-12	Arhgef18
ENSMUSG00000051043	30.8368	-2.20019	0.301055	-7.30826	2.70622e-13	7.82511e-12	Gprc5c
ENSMUSG00000045928	3.08727	-4.85337	0.664746	-7.30108	2.85462e-13	8.21555e-12	4933440M02Rik
ENSMUSG00000002688	48.3653	-3.06286	0.419616	-7.29919	2.89496e-13	8.32191e-12	Prkd1
ENSMUSG00000113216	210.835	-2.049	0.280736	-7.29866	2.90658e-13	8.33581e-12	AL590503,1
ENSMUSG00000044647	4.82361	-4.39628	0.602402	-7.29792	2.9226e-13	8.37199e-12	Csrnp3
ENSMUSG00000004633	56.1427	-1.67199	0.229121	-7.29743	2.93322e-13	8.39262e-12	Chn2
ENSMUSG00000060961	145.821	-3.35371	0.459642	-7.29635	2.95674e-13	8.45008e-12	Slc4a4
ENSMUSG00000035173	413.89	-1.90349	0.261011	-7.29274	3.0371e-13	8.66967e-12	Ccdc186
ENSMUSG00000076925	17.9376	-3.91226	0.536632	-7.29041	3.0902e-13	8.80079e-12	Traj3
ENSMUSG00000037390	4.4427	-4.95794	0.680232	-7.2886	3.13183e-13	8.90903e-12	Muc3
ENSMUSG00000030554	146.609	-2.38109	0.327179	-7.27764	3.39713e-13	9.6303e-12	Synm
ENSMUSG00000031532	2532.71	-0.887956	0.12207	-7.27416	3.48583e-13	9.859e-12	Saraf
ENSMUSG00000047751	8.20764	-4.57789	0.629438	-7.27297	3.51662e-13	9.93466e-12	Utf1
ENSMUSG00000057135	15.5621	-2.78482	0.383054	-7.27005	3.5936e-13	1.01405e-11	Scimp
ENSMUSG00000049630	14.7846	-3.16369	0.435492	-7.26464	3.74027e-13	1.05181e-11	C1ql3
ENSMUSG00000036817	758.477	-0.781652	0.107594	-7.26485	3.73452e-13	1.05181e-11	Sun1
ENSMUSG00000033730	77.7781	-3.77709	0.520195	-7.26091	3.84488e-13	1.07753e-11	Egr3
ENSMUSG00000025081	2.54719	-4.79816	0.661505	-7.25339	4.0646e-13	1.13652e-11	Tdrd1
ENSMUSG00000038375	710.473	-2.27722	0.313996	-7.25239	4.09492e-13	1.14369e-11	Trp53inp2
ENSMUSG00000067261	10.4578	-3.89186	0.53727	-7.24378	4.36365e-13	1.21598e-11	Foxd3
ENSMUSG00000021278	10.6887	-2.5533	0.352731	-7.23866	4.53148e-13	1.26132e-11	Amn
ENSMUSG00000039747	1057.92	-1.77091	0.244693	-7.23728	4.57769e-13	1.27274e-11	Orai2
ENSMUSG00000031389	2896.51	-1.64113	0.226864	-7.23399	4.69005e-13	1.30251e-11	Arhgap4
ENSMUSG00000090946	425.382	-0.926362	0.128074	-7.23302	4.72365e-13	1.31036e-11	Ccdc71l
ENSMUSG00000004071	1056.57	-0.858436	0.118733	-7.22996	4.83135e-13	1.33872e-11	Cdip1
ENSMUSG00000039607	115.555	-2.23328	0.308965	-7.22827	4.89179e-13	1.35395e-11	Rbms3
ENSMUSG00000021495	2478.29	-1.11277	0.153972	-7.2271	4.934e-13	1.36199e-11	Fam193b
ENSMUSG00000052593	1735.11	-0.977001	0.135186	-7.22707	4.9352e-13	1.36199e-11	Adam17
ENSMUSG00000063903	53.4399	-3.77696	0.522676	-7.22621	4.96673e-13	1.36852e-11	Klk1
ENSMUSG00000076910	4.822	-4.03215	0.558062	-7.22528	5.00084e-13	1.37638e-11	Traj19
ENSMUSG00000029859	37.4347	-2.97117	0.411397	-7.22214	5.11761e-13	1.40542e-11	Epha1
ENSMUSG00000050315	242.896	-2.50388	0.34682	-7.21953	5.21669e-13	1.43098e-11	Synpo2
ENSMUSG00000026688	205.882	-2.45446	0.340026	-7.21845	5.25817e-13	1.44075e-11	Mgst3
ENSMUSG00000036120	349.908	-0.954475	0.132393	-7.20943	5.61879e-13	1.53273e-11	Rfxank
ENSMUSG00000074457	245.429	-2.116	0.293598	-7.20713	5.71442e-13	1.55708e-11	S100a16
ENSMUSG00000043629	32.9414	-3.36032	0.466291	-7.20648	5.74171e-13	1.56279e-11	1700019D03Rik
ENSMUSG00000045441	33.6163	-3.42478	0.476432	-7.18839	6.55591e-13	1.77849e-11	Gprin3
ENSMUSG00000067586	223.869	-2.09886	0.29206	-7.18642	6.65122e-13	1.80236e-11	S1pr3
ENSMUSG00000025757	840.254	-1.60171	0.222901	-7.18577	6.68279e-13	1.80851e-11	Hspa4l
ENSMUSG00000015291	2332.08	-1.07936	0.15021	-7.18565	6.68864e-13	1.80851e-11	Gdi1
ENSMUSG00000054555	438.509	-3.29616	0.459183	-7.17833	7.05685e-13	1.90179e-11	Adam12
ENSMUSG00000020173	89.8995	-3.29381	0.459096	-7.17456	7.25394e-13	1.95063e-11	Cobl
ENSMUSG00000031451	1556.87	-1.89349	0.264141	-7.16847	7.58378e-13	2.03487e-11	Gas6
ENSMUSG00000025279	238.747	-3.36741	0.47027	-7.16059	8.03307e-13	2.15307e-11	Dnase1l3
ENSMUSG00000085936	251.75	-1.34177	0.18742	-7.15918	8.1163e-13	2.17301e-11	2610307P16Rik
ENSMUSG00000021680	14.5856	-4.68618	0.65462	-7.15862	8.14915e-13	2.17706e-11	Crhbp
ENSMUSG00000035901	556.833	-1.85581	0.259274	-7.1577	8.20411e-13	2.18937e-11	Dennd5a
ENSMUSG00000027016	6.62083	-3.56292	0.497801	-7.15732	8.227e-13	2.19309e-11	Zfp385b
ENSMUSG00000076891	3.19334	-4.43517	0.620233	-7.1508	8.62717e-13	2.29728e-11	Traj39
ENSMUSG00000059305	18.9106	-2.16936	0.303497	-7.14789	8.81236e-13	2.34405e-11	Vpreb1
ENSMUSG00000019851	296.042	-3.41624	0.478104	-7.14538	8.97475e-13	2.38466e-11	Perp
ENSMUSG00000062488	44.8631	-3.06835	0.429513	-7.14378	9.07976e-13	2.40996e-11	Ifit3b
ENSMUSG00000031489	237.606	-5.92187	0.82949	-7.13917	9.38941e-13	2.48678e-11	Adrb3
ENSMUSG00000026344	426.403	-4.80678	0.673894	-7.13284	9.83179e-13	2.59277e-11	Lypd1
ENSMUSG00000097850	23.3924	-4.79337	0.672382	-7.12895	1.01137e-12	2.66426e-11	4631405K08Rik
ENSMUSG00000039201	198.083	-0.952421	0.133616	-7.12803	1.01815e-12	2.67923e-11	Tbc1d25
ENSMUSG00000053886	24.6715	-3.09647	0.434458	-7.1272	1.0243e-12	2.69255e-11	Sh2d4a
ENSMUSG00000022512	54.2835	-3.26886	0.459104	-7.1201	1.0785e-12	2.83198e-11	Cldn1
ENSMUSG00000040714	292.905	-3.12883	0.439532	-7.11855	1.09066e-12	2.86086e-11	Klc3
ENSMUSG00000042249	164.087	-1.9715	0.27709	-7.11502	1.11899e-12	2.93204e-11	Grk3
ENSMUSG00000080708	36.9238	-1.65789	0.233031	-7.11446	1.12356e-12	2.94087e-11	Ccnd3-ps
ENSMUSG00000001065	625.827	-0.768195	0.108002	-7.11281	1.13701e-12	2.97293e-11	Zfp276
ENSMUSG00000021127	1321.8	-1.43932	0.202543	-7.10623	1.19258e-12	3.11161e-11	Zfp36l1
ENSMUSG00000032515	1346.64	-1.29845	0.182784	-7.10371	1.21454e-12	3.16554e-11	Csrnp1
ENSMUSG00000076916	7.70036	-3.2852	0.463028	-7.09504	1.2931e-12	3.3596e-11	Traj13
ENSMUSG00000033860	8.22229	-3.98452	0.561674	-7.094	1.3029e-12	3.38148e-11	Fgg
ENSMUSG00000031155	283.312	-1.31062	0.184812	-7.09163	1.32539e-12	3.43259e-11	Pim2
ENSMUSG00000024778	555.861	-2.04514	0.2884	-7.09134	1.32816e-12	3.43615e-11	Fas
ENSMUSG00000039264	501.872	-3.31587	0.467911	-7.08653	1.37512e-12	3.54645e-11	Gimap3
ENSMUSG00000025504	70.7266	-2.82435	0.398544	-7.08666	1.37383e-12	3.54645e-11	Eps8l2
ENSMUSG00000063297	10.7759	-3.66792	0.517911	-7.08214	1.4195e-12	3.65707e-11	Luzp2
ENSMUSG00000048138	99.3967	-4.31693	0.609656	-7.08093	1.43186e-12	3.68119e-11	Dmrt2
ENSMUSG00000030203	241.301	-2.63768	0.373073	-7.07014	1.54774e-12	3.9543e-11	Dusp16
ENSMUSG00000076899	5.7359	-3.87645	0.548505	-7.06731	1.57971e-12	4.03179e-11	Traj30
ENSMUSG00000020541	60.1675	-3.02051	0.427431	-7.06665	1.58716e-12	4.0466e-11	Tom1l1
ENSMUSG00000048142	204.853	-3.36684	0.476901	-7.05984	1.6669e-12	4.2411e-11	Nat8l
ENSMUSG00000003418	65.5477	-2.18808	0.309994	-7.05844	1.68379e-12	4.27524e-11	St8sia6
ENSMUSG00000076896	3.22373	-4.46527	0.632705	-7.05743	1.69612e-12	4.29766e-11	Traj33
ENSMUSG00000102973	127.437	-2.42019	0.343004	-7.05587	1.71529e-12	4.34175e-11	E430014B02Rik
ENSMUSG00000107486	6.2008	-3.86637	0.548065	-7.05458	1.73117e-12	4.37745e-11	Trbv4
ENSMUSG00000056735	67.5482	-1.76001	0.249628	-7.05053	1.78236e-12	4.50224e-11	A930024E05Rik
ENSMUSG00000023043	1765.89	-4.43723	0.629502	-7.0488	1.8047e-12	4.554e-11	Krt18
ENSMUSG00000114715	3.42414	-4.78677	0.679112	-7.04858	1.80756e-12	4.55655e-11	AC168056,3
ENSMUSG00000037071	39700.5	-5.50387	0.781105	-7.04626	1.83788e-12	4.62348e-11	Scd1
ENSMUSG00000101599	75.6039	-1.66756	0.236719	-7.04447	1.86163e-12	4.67367e-11	Gm20342
ENSMUSG00000099145	18.4272	-5.01325	0.711918	-7.0419	1.89638e-12	4.75605e-11	Mir8116
ENSMUSG00000095123	214.143	-1.13926	0.161879	-7.03771	1.95426e-12	4.8962e-11	Gm21781
ENSMUSG00000024134	31.5158	-4.0792	0.579841	-7.03504	1.99203e-12	4.97058e-11	Six2
ENSMUSG00000017311	3.62334	-5.10039	0.725207	-7.03301	2.02118e-12	5.0382e-11	Pyy
ENSMUSG00000017802	2413.41	-0.696118	0.0990106	-7.03074	2.05443e-12	5.1107e-11	Retreg3
ENSMUSG00000020383	7.8582	-4.78868	0.681315	-7.02858	2.08651e-12	5.18526e-11	Il13
ENSMUSG00000020669	25.8477	-1.72846	0.245964	-7.02729	2.10584e-12	5.22801e-11	Sh3yl1
ENSMUSG00000045284	6.62368	-3.18599	0.453646	-7.02307	2.17041e-12	5.37746e-11	Dcaf12l1
ENSMUSG00000054083	53.469	-2.83136	0.403199	-7.02224	2.18338e-12	5.39591e-11	Capn12
ENSMUSG00000087521	12.7916	-4.60305	0.655879	-7.01814	2.24837e-12	5.54267e-11	AI646519
ENSMUSG00000114698	2.33455	-4.67319	0.666151	-7.01521	2.29597e-12	5.64868e-11	AC173482,4
ENSMUSG00000030766	576.932	-0.945737	0.13481	-7.01535	2.29373e-12	5.64868e-11	Arhgap17
ENSMUSG00000105339	18.5994	-1.54687	0.220547	-7.0138	2.31933e-12	5.69859e-11	Gm42457
ENSMUSG00000034673	1433.38	-0.852482	0.121605	-7.01024	2.3791e-12	5.82987e-11	Pbx2
ENSMUSG00000094840	29.055	-4.66057	0.664907	-7.00936	2.39413e-12	5.86086e-11	Muc3a
ENSMUSG00000039616	80.3107	-2.36302	0.337268	-7.00636	2.44591e-12	5.9757e-11	Mocos
ENSMUSG00000021448	3.46099	-4.79455	0.68438	-7.00569	2.45763e-12	5.99837e-11	Shc3
ENSMUSG00000066441	585.979	-0.774551	0.110623	-7.00172	2.52835e-12	6.15266e-11	Rdh11
ENSMUSG00000085110	4.83264	-3.33079	0.475776	-7.00075	2.54587e-12	6.18916e-11	Gm13920
ENSMUSG00000105632	3.46183	-4.34612	0.620955	-6.99909	2.57629e-12	6.25693e-11	Gm43272
ENSMUSG00000001583	12.1957	-2.61482	0.373669	-6.9977	2.60204e-12	6.31321e-11	Tnk1
ENSMUSG00000042675	1082.43	-1.84992	0.264378	-6.99726	2.6102e-12	6.32677e-11	Ypel3
ENSMUSG00000052075	4.31651	-5.13614	0.734537	-6.99236	2.70306e-12	6.53253e-11	1700029F12Rik
ENSMUSG00000039536	1148.68	-0.419408	0.0600007	-6.99006	2.74766e-12	6.62078e-11	Stau1
ENSMUSG00000015134	74.2411	-3.72477	0.533503	-6.98173	2.91569e-12	7.00506e-11	Aldh1a3
ENSMUSG00000038949	1012.83	-1.15141	0.164934	-6.98104	2.92998e-12	7.03252e-11	Cnst
ENSMUSG00000095930	519.01	-2.17637	0.311913	-6.97748	3.00519e-12	7.19898e-11	Nim1k
ENSMUSG00000034574	250.616	-2.28746	0.327847	-6.97721	3.01093e-12	7.20571e-11	Daam1
ENSMUSG00000030126	759.105	-1.08679	0.155788	-6.97607	3.0355e-12	7.25745e-11	Tmcc1
ENSMUSG00000032258	92.2966	-3.5951	0.515374	-6.97571	3.04332e-12	7.26906e-11	Lca5
ENSMUSG00000087598	11.9336	-2.53008	0.362846	-6.97288	3.10523e-12	7.40975e-11	Zfp111
ENSMUSG00000016283	174.762	-4.00153	0.574223	-6.9686	3.20102e-12	7.63091e-11	H2-M2
ENSMUSG00000031750	69.1425	-2.08247	0.299115	-6.96211	3.35223e-12	7.97591e-11	Il34
ENSMUSG00000017412	6.14276	-3.38817	0.486729	-6.9611	3.37625e-12	8.02529e-11	Cacnb4
ENSMUSG00000090386	14.3056	-2.70709	0.389288	-6.95395	3.55209e-12	8.43509e-11	Mir99ahg
ENSMUSG00000024862	325.116	-0.784126	0.112801	-6.9514	3.6167e-12	8.56371e-11	Klc2
ENSMUSG00000071356	6.64687	-4.71126	0.678009	-6.94867	3.68734e-12	8.72257e-11	Reg3b
ENSMUSG00000030546	900.592	-5.66355	0.81541	-6.94565	3.76735e-12	8.90326e-11	Plin1
ENSMUSG00000035545	4214.83	-0.886826	0.127695	-6.9449	3.78725e-12	8.9417e-11	Leng8
ENSMUSG00000029638	308.951	-2.42366	0.349147	-6.94166	3.87518e-12	9.12301e-11	Glcci1
ENSMUSG00000076758	20.0543	-3.09146	0.445562	-6.93834	3.96728e-12	9.31308e-11	Trav1
ENSMUSG00000029403	54.0295	-2.74151	0.395155	-6.93781	3.98236e-12	9.32702e-11	Cdkl2
ENSMUSG00000037552	2274.06	-1.68947	0.24352	-6.93773	3.98461e-12	9.32702e-11	Plekhg2
ENSMUSG00000031957	3.85858	-4.52906	0.653439	-6.93112	4.17526e-12	9.72698e-11	Ctrb1
ENSMUSG00000076918	8.06414	-3.04033	0.439084	-6.92425	4.38304e-12	1.02014e-10	Traj11
ENSMUSG00000000378	1813.56	-1.26805	0.183189	-6.92205	4.45147e-12	1.03508e-10	Ccm2
ENSMUSG00000049382	2049.79	-4.47613	0.647188	-6.91628	4.63666e-12	1.07509e-10	Krt8
ENSMUSG00000038855	2851.66	-1.46505	0.212004	-6.91049	4.82999e-12	1.11676e-10	Itpkb
ENSMUSG00000001248	2202.56	-1.81792	0.263093	-6.9098	4.8535e-12	1.12114e-10	Gramd1a
ENSMUSG00000085741	122.609	-0.98041	0.141968	-6.90585	4.99052e-12	1.15171e-10	5430405H02Rik
ENSMUSG00000109378	33.3604	-1.20851	0.175017	-6.90511	5.01659e-12	1.15556e-10	U2af1l4
ENSMUSG00000051048	99.695	-2.55998	0.37077	-6.90448	5.03876e-12	1.15958e-10	P4ha3
ENSMUSG00000024610	7993.14	-2.53275	0.366876	-6.90355	5.07172e-12	1.16607e-10	Cd74
ENSMUSG00000049866	1759.6	-1.46398	0.212088	-6.90272	5.10169e-12	1.17186e-10	Arl4c
ENSMUSG00000038179	34.6009	-2.23961	0.324471	-6.90235	5.11494e-12	1.17381e-10	Slamf7
ENSMUSG00000061353	2037.46	-2.22392	0.322254	-6.90113	5.15908e-12	1.18283e-10	Cxcl12
ENSMUSG00000056290	364.019	-2.90588	0.421512	-6.89393	5.42729e-12	1.24201e-10	Ms4a4b
ENSMUSG00000087519	11.3281	-1.88527	0.273479	-6.89366	5.43762e-12	1.24322e-10	AV039307
ENSMUSG00000096478	14.2469	-4.24881	0.616384	-6.89313	5.45797e-12	1.24671e-10	Trav9d-1
ENSMUSG00000110185	88.733	-2.20094	0.319433	-6.89014	5.57378e-12	1.26698e-10	Igip
ENSMUSG00000038893	1151.57	-1.17729	0.170869	-6.89004	5.57765e-12	1.26698e-10	Fam117a
ENSMUSG00000030737	318.404	-1.55709	0.226105	-6.8866	5.71415e-12	1.29559e-10	Slco2b1
ENSMUSG00000031292	70.5635	-3.14791	0.457116	-6.88646	5.71965e-12	1.29564e-10	Cdkl5
ENSMUSG00000025481	18.6162	-3.52067	0.511276	-6.88604	5.73673e-12	1.29832e-10	Urah
ENSMUSG00000019845	984.046	-2.04072	0.296506	-6.88254	5.87949e-12	1.3294e-10	Tube1
ENSMUSG00000023328	314.065	-4.71579	0.685774	-6.8766	6.12997e-12	1.38096e-10	Ache
ENSMUSG00000001497	34.973	-4.04933	0.588872	-6.87643	6.1372e-12	1.38132e-10	Pax9
ENSMUSG00000047293	4.49499	-4.28871	0.623904	-6.87398	6.24349e-12	1.40396e-10	Gpr15
ENSMUSG00000001029	919.484	-1.44345	0.210007	-6.87337	6.27018e-12	1.40867e-10	Icam2
ENSMUSG00000108129	47.4499	-2.48115	0.361052	-6.87201	6.33056e-12	1.41964e-10	4930417O13Rik
ENSMUSG00000071771	2.47211	-4.5308	0.65958	-6.86921	6.45578e-12	1.44508e-10	Rhox4b
ENSMUSG00000109291	5.53431	-3.77923	0.550592	-6.86394	6.69878e-12	1.49675e-10	Gm2814
ENSMUSG00000002588	69.6792	-6.13899	0.894912	-6.85988	6.89168e-12	1.53845e-10	Pon1
ENSMUSG00000043068	16.8185	-3.36368	0.490372	-6.85944	6.91287e-12	1.54178e-10	Fam89a
ENSMUSG00000022383	64.2999	-6.16928	0.899983	-6.85488	7.13704e-12	1.5889e-10	Ppara
ENSMUSG00000040687	1599.87	-1.08634	0.158584	-6.85028	7.37072e-12	1.63795e-10	Madd
ENSMUSG00000032864	1950.13	-4.58144	0.66885	-6.84974	7.39861e-12	1.64266e-10	Rag2
ENSMUSG00000021198	16.9742	-3.11246	0.454438	-6.84903	7.43527e-12	1.64931e-10	Unc79
ENSMUSG00000023927	18222.1	-1.6882	0.246674	-6.84386	7.70853e-12	1.70839e-10	Satb1
ENSMUSG00000017978	34.8753	-3.55974	0.520527	-6.83873	7.98962e-12	1.7675e-10	Cadps2
ENSMUSG00000082286	422.009	-1.51724	0.22206	-6.83255	8.34177e-12	1.83878e-10	Pisd-ps1
ENSMUSG00000038352	2736.24	-3.37701	0.495152	-6.82015	9.0944e-12	1.99395e-10	Arl5c
ENSMUSG00000067594	17.3829	-5.0602	0.742634	-6.81386	9.50173e-12	2.0814e-10	Krt77
ENSMUSG00000038535	1927.01	-1.33919	0.196623	-6.81092	9.69741e-12	2.12238e-10	Zfp280d
ENSMUSG00000063935	10.4724	-5.21525	0.765948	-6.80889	9.83568e-12	2.1469e-10	Zar1
ENSMUSG00000022454	17.7185	-3.39674	0.498865	-6.80893	9.83293e-12	2.1469e-10	Nell2
ENSMUSG00000079853	5.02817	-3.36541	0.494255	-6.80906	9.82388e-12	2.1469e-10	Klra1
ENSMUSG00000033419	95.3744	-5.39823	0.793072	-6.80673	9.98403e-12	2.17349e-10	Snap91
ENSMUSG00000076858	6.99348	-3.54822	0.521488	-6.80403	1.0173e-11	2.21073e-10	Trav3-4
ENSMUSG00000038242	22.7464	-5.14587	0.756465	-6.80252	1.02802e-11	2.23204e-10	Aox4
ENSMUSG00000076477	2.38119	-4.46488	0.65687	-6.79721	1.06666e-11	2.31186e-10	Trbv21
ENSMUSG00000102411	9.48812	-2.1561	0.317289	-6.79538	1.08029e-11	2.33932e-10	Gm36936
ENSMUSG00000027356	50.4158	-4.37629	0.644182	-6.79356	1.09396e-11	2.36584e-10	Fermt1
ENSMUSG00000024892	1435.39	-4.36952	0.643555	-6.78965	1.12403e-11	2.4255e-10	Pcx
ENSMUSG00000114358	4.57627	-3.94637	0.581268	-6.78925	1.12716e-11	2.43011e-10	AC154290,1
ENSMUSG00000030559	24.2958	-2.19397	0.323184	-6.78859	1.13231e-11	2.43909e-10	Rab38
ENSMUSG00000048826	242.309	-4.37682	0.645014	-6.78561	1.15594e-11	2.48563e-10	Dact2
ENSMUSG00000051617	5.44686	-4.82145	0.710881	-6.78236	1.1823e-11	2.54009e-10	Krt9
ENSMUSG00000044986	250.346	-2.46031	0.362815	-6.78118	1.19201e-11	2.55871e-10	Tst
ENSMUSG00000061397	22.8439	-3.86872	0.570624	-6.7798	1.20343e-11	2.58096e-10	Krt79
ENSMUSG00000028668	2011.9	-0.871995	0.128655	-6.77779	1.22024e-11	2.61019e-10	Eloa
ENSMUSG00000022270	225.161	-2.65699	0.392054	-6.7771	1.22616e-11	2.62057e-10	Retreg1
ENSMUSG00000109680	4.45483	-4.28815	0.633267	-6.77146	1.27485e-11	2.71754e-10	Gm32098
ENSMUSG00000003849	88.6597	-1.92622	0.284459	-6.7715	1.27454e-11	2.71754e-10	Nqo1
ENSMUSG00000061068	24.6579	-5.18948	0.766396	-6.77128	1.27646e-11	2.71862e-10	Mcpt4
ENSMUSG00000013643	16.6668	-3.75033	0.553892	-6.77087	1.2801e-11	2.72402e-10	Lypd8
ENSMUSG00000054200	21.2762	-3.3372	0.492916	-6.77033	1.28493e-11	2.72957e-10	Ffar4
ENSMUSG00000028031	9.15818	-2.23691	0.330592	-6.76639	1.3204e-11	2.79765e-10	Dkk2
ENSMUSG00000040372	3.68873	-4.22119	0.623892	-6.7659	1.3248e-11	2.80457e-10	Gpr63
ENSMUSG00000031600	516.635	-1.26119	0.18645	-6.76423	1.34019e-11	2.8347e-10	Vps37a
ENSMUSG00000027792	13.3251	-2.90148	0.429199	-6.76022	1.37786e-11	2.91188e-10	Bche
ENSMUSG00000003847	1625.74	-1.345	0.198965	-6.76	1.37992e-11	2.91373e-10	Nfat5
ENSMUSG00000024240	1539.31	-0.787104	0.116518	-6.75522	1.42619e-11	3.00624e-10	Epc1
ENSMUSG00000042814	83.3173	-1.20906	0.179028	-6.75347	1.44354e-11	3.03501e-10	Mcts2
ENSMUSG00000056724	2106.49	-1.15193	0.170577	-6.75313	1.44691e-11	3.03819e-10	Nbeal2
ENSMUSG00000028307	5.26423	-4.78288	0.708505	-6.75066	1.47173e-11	3.08637e-10	Aldob
ENSMUSG00000027377	55.2069	-1.93484	0.286652	-6.74978	1.48069e-11	3.1025e-10	Mall
ENSMUSG00000081058	7.47611	-2.40775	0.356744	-6.74925	1.48607e-11	3.11112e-10	Hist2h3c2
ENSMUSG00000032434	1453.24	-1.05277	0.155999	-6.74856	1.49315e-11	3.12329e-10	Cmtm6
ENSMUSG00000027994	66.0533	-2.31789	0.343525	-6.74735	1.50572e-11	3.14691e-10	Mcub
ENSMUSG00000032827	52.6357	-3.08405	0.457434	-6.74207	1.56143e-11	3.25779e-10	Ppp1r9a
ENSMUSG00000045314	8.31712	-4.44459	0.659403	-6.74033	1.58032e-11	3.29163e-10	Sowahb
ENSMUSG00000075217	17.2128	-3.71471	0.551164	-6.73975	1.58658e-11	3.30186e-10	4833423E24Rik
ENSMUSG00000034161	9.92912	-2.66914	0.396345	-6.73439	1.64616e-11	3.42006e-10	Scx
ENSMUSG00000039315	3.43916	-4.11896	0.611932	-6.73109	1.68401e-11	3.4928e-10	Clnk
ENSMUSG00000032285	71.265	-2.62674	0.390255	-6.73082	1.68713e-11	3.49632e-10	Dnaja4
ENSMUSG00000021880	45.8896	-2.15586	0.320307	-6.73061	1.68958e-11	3.49844e-10	Rnase6
ENSMUSG00000074505	8.22974	-2.88167	0.428193	-6.72984	1.69855e-11	3.51405e-10	Fat3
ENSMUSG00000078117	4.64982	-4.17033	0.619822	-6.72827	1.71694e-11	3.54912e-10	Gm16485
ENSMUSG00000027718	15.7272	-4.10317	0.610053	-6.72593	1.7447e-11	3.60309e-10	Il21
ENSMUSG00000042423	1941.48	-0.802891	0.119459	-6.72108	1.80384e-11	3.71313e-10	Fbrs
ENSMUSG00000061126	4.89944	-3.34156	0.497679	-6.71429	1.88982e-11	3.88361e-10	Cyp4f39
ENSMUSG00000022849	205.353	-1.74911	0.260775	-6.70738	1.98153e-11	4.05513e-10	Hspbap1
ENSMUSG00000019189	3401.63	-1.26726	0.188946	-6.70698	1.98698e-11	4.0629e-10	Rnf145
ENSMUSG00000041592	30.8651	-1.98139	0.295446	-6.70643	1.9944e-11	4.07468e-10	Sdk2
ENSMUSG00000024424	52.4923	-2.46187	0.367309	-6.70245	2.04954e-11	4.18039e-10	Ttc39c
ENSMUSG00000073125	31.7551	-3.96622	0.591893	-6.7009	2.0714e-11	4.22146e-10	Xlr3b
ENSMUSG00000063415	121.523	-2.03667	0.303976	-6.70011	2.08259e-11	4.24076e-10	Cyp26b1
ENSMUSG00000041189	41.6525	-1.94006	0.28957	-6.69979	2.08721e-11	4.24665e-10	Chrnb1
ENSMUSG00000024682	2.14468	-4.78691	0.71458	-6.69891	2.09973e-11	4.26859e-10	Gif
ENSMUSG00000020405	7.21064	-5.03113	0.751287	-6.69669	2.13194e-11	4.32691e-10	Fabp6
ENSMUSG00000056043	15.5241	-3.21275	0.480209	-6.69031	2.22692e-11	4.5048e-10	Rgs9bp
ENSMUSG00000078429	2457.06	-1.64348	0.245773	-6.68698	2.2783e-11	4.60115e-10	Ctdsp2
ENSMUSG00000028373	9.24516	-2.88838	0.432007	-6.68595	2.29428e-11	4.62963e-10	Astn2
ENSMUSG00000036832	11.4803	-3.975	0.594885	-6.68196	2.35767e-11	4.74974e-10	Lpar3
ENSMUSG00000097219	126.936	-2.8819	0.431501	-6.67878	2.40945e-11	4.85008e-10	Gm26551
ENSMUSG00000020395	5288.88	-1.34674	0.201678	-6.6777	2.42722e-11	4.87786e-10	Itk
ENSMUSG00000025880	67.5468	-1.96258	0.293989	-6.67567	2.461e-11	4.9417e-10	Smad7
ENSMUSG00000076913	5.0791	-3.34709	0.501691	-6.67162	2.53001e-11	5.072e-10	Traj16
ENSMUSG00000032870	1786.96	-0.835557	0.12532	-6.66739	2.60385e-11	5.21151e-10	Smap2
ENSMUSG00000043753	4.42343	-4.07388	0.61104	-6.66712	2.60875e-11	5.21707e-10	Dmrta1
ENSMUSG00000067212	2092.94	-1.53053	0.22995	-6.65592	2.81525e-11	5.61177e-10	H2-T23
ENSMUSG00000026768	15.999	-2.92407	0.439543	-6.65253	2.88105e-11	5.73364e-10	Itga8
ENSMUSG00000053797	18.1904	-4.60359	0.692172	-6.65093	2.91239e-11	5.79132e-10	Krt16
ENSMUSG00000045464	46.9043	-1.14923	0.172848	-6.64881	2.95474e-11	5.86603e-10	2810002D19Rik
ENSMUSG00000020758	178.436	-2.06962	0.311426	-6.64564	3.01911e-11	5.98884e-10	Itgb4
ENSMUSG00000086158	58.498	-0.874766	0.131688	-6.64269	3.08005e-11	6.09022e-10	Ccpg1os
ENSMUSG00000033590	141.473	-3.46143	0.521512	-6.6373	3.19479e-11	6.31201e-10	Myo5c
ENSMUSG00000076846	9.71213	-3.89289	0.586646	-6.63585	3.2263e-11	6.36468e-10	Trav13-2
ENSMUSG00000081944	11.19	-2.18957	0.329961	-6.63584	3.22662e-11	6.36468e-10	Gm12276
ENSMUSG00000021114	1524.92	-0.612944	0.0923809	-6.63497	3.24578e-11	6.39222e-10	Atp6v1d
ENSMUSG00000086693	7.69862	-2.2123	0.33358	-6.63199	3.31183e-11	6.50144e-10	A730081D07Rik
ENSMUSG00000027765	12.5985	-2.69587	0.406602	-6.63026	3.35097e-11	6.56779e-10	P2ry1
ENSMUSG00000018819	3961.58	-2.63369	0.397217	-6.63036	3.34875e-11	6.56779e-10	Lsp1
ENSMUSG00000017204	5.40538	-4.38203	0.66094	-6.63	3.35694e-11	6.57425e-10	Gsdma
ENSMUSG00000076914	8.24599	-3.38062	0.51011	-6.62723	3.42037e-11	6.68781e-10	Traj15
ENSMUSG00000000308	128.186	-3.57067	0.538903	-6.62581	3.45351e-11	6.74725e-10	Ckmt1
ENSMUSG00000079554	59.9142	-3.46649	0.523307	-6.62421	3.49114e-11	6.81258e-10	Aox2
ENSMUSG00000000861	45.664	-3.08713	0.466042	-6.62415	3.49249e-11	6.81258e-10	Bcl11a
ENSMUSG00000021730	11.5936	-4.74612	0.716735	-6.62187	3.54687e-11	6.91316e-10	Hcn1
ENSMUSG00000020902	531.278	-1.85319	0.279882	-6.62132	3.56011e-11	6.92798e-10	Ntn1
ENSMUSG00000096472	1614.01	-1.17272	0.17722	-6.61732	3.65767e-11	7.11221e-10	Cdkn2d
ENSMUSG00000032000	648.283	-0.813347	0.122996	-6.61277	3.77183e-11	7.31104e-10	Birc3
ENSMUSG00000032080	12.1389	-3.85674	0.583296	-6.61198	3.79216e-11	7.34465e-10	Apoa4
ENSMUSG00000025930	57.0772	-2.83647	0.429152	-6.60947	3.85708e-11	7.46451e-10	Msc
ENSMUSG00000064325	62.0505	-4.96447	0.751312	-6.60774	3.90229e-11	7.54014e-10	Hhip
ENSMUSG00000031224	3.17592	-3.9931	0.604502	-6.60559	3.95931e-11	7.64429e-10	Magee2
ENSMUSG00000076893	4.62583	-3.10862	0.470736	-6.60374	4.00906e-11	7.73428e-10	Traj37
ENSMUSG00000053774	1451.06	-0.819778	0.124296	-6.59535	4.24242e-11	8.15247e-10	Ubxn7
ENSMUSG00000040102	513.407	-0.84246	0.127745	-6.59486	4.25668e-11	8.17348e-10	Klhl42
ENSMUSG00000050088	402.683	-0.85101	0.129099	-6.59193	4.3415e-11	8.31686e-10	1600012H06Rik
ENSMUSG00000103115	63.3464	-1.33347	0.202373	-6.58914	4.42393e-11	8.45501e-10	Gm37584
ENSMUSG00000021763	27.6998	-3.1376	0.476217	-6.58859	4.44036e-11	8.47322e-10	BC067074
ENSMUSG00000055805	5096.86	-1.00528	0.152586	-6.58828	4.44941e-11	8.48391e-10	Fmnl1
ENSMUSG00000017119	1926.29	-0.814661	0.123699	-6.58584	4.52313e-11	8.61778e-10	Nbr1
ENSMUSG00000021294	79.739	-1.67832	0.255082	-6.57953	4.71929e-11	8.97761e-10	Kif26a
ENSMUSG00000044041	2.65579	-4.86698	0.740446	-6.57304	4.92981e-11	9.35636e-10	Krt13
ENSMUSG00000100985	5.15352	-3.50372	0.533037	-6.57313	4.92696e-11	9.35636e-10	Gm10640
ENSMUSG00000106032	4.93838	-2.8451	0.432884	-6.57243	4.94992e-11	9.38004e-10	Gm42463
ENSMUSG00000109713	10.6096	-2.1456	0.326453	-6.57244	4.94976e-11	9.38004e-10	Pvrig
ENSMUSG00000060586	3447.74	-2.35371	0.358462	-6.56615	5.16341e-11	9.76202e-10	H2-Eb1
ENSMUSG00000040389	261.628	-1.1951	0.182026	-6.56556	5.18391e-11	9.79325e-10	Wdr47
ENSMUSG00000086484	183.2	-2.86033	0.435728	-6.56448	5.2214e-11	9.85649e-10	Nron
ENSMUSG00000047181	101.481	-2.43083	0.370415	-6.56244	5.29359e-11	9.9851e-10	Samd14
ENSMUSG00000034771	204.98	-2.70141	0.411765	-6.56058	5.36001e-11	1.01026e-09	Tle2
ENSMUSG00000060183	46.43	-4.84379	0.738414	-6.55972	5.39075e-11	1.01528e-09	Cxcl11
ENSMUSG00000037638	63.7199	-1.82253	0.27795	-6.55705	5.48827e-11	1.03049e-09	Zbtb42
ENSMUSG00000076892	3.49638	-4.12941	0.62992	-6.55545	5.54726e-11	1.04077e-09	Traj38
ENSMUSG00000066621	1842.2	-1.32263	0.201822	-6.55344	5.62258e-11	1.05409e-09	Tecpr1
ENSMUSG00000024228	30.1712	-3.35548	0.512305	-6.54978	5.76224e-11	1.07536e-09	Nudt12
ENSMUSG00000085873	3.98619	-3.27416	0.499904	-6.54959	5.76962e-11	1.07592e-09	Ttc39aos1
ENSMUSG00000019699	278.873	-2.3986	0.366585	-6.5431	6.0257e-11	1.12282e-09	Akt3
ENSMUSG00000021696	48.1637	-2.89884	0.443091	-6.54231	6.05744e-11	1.12788e-09	Elovl7
ENSMUSG00000057454	5.48827	-4.82966	0.738551	-6.53937	6.17781e-11	1.14855e-09	Lypd3
ENSMUSG00000017767	4.64646	-3.67514	0.562137	-6.53781	6.24242e-11	1.15968e-09	Spata25
ENSMUSG00000085181	43.8741	-2.88441	0.441433	-6.5342	6.39486e-11	1.18532e-09	Gm12709
ENSMUSG00000052572	79.6574	-3.71511	0.568604	-6.53374	6.4147e-11	1.1881e-09	Dlg2
ENSMUSG00000059811	3666.77	-1.39735	0.213973	-6.53048	6.55589e-11	1.21151e-09	Atl2
ENSMUSG00000036169	8.20109	-2.63841	0.404063	-6.5297	6.59036e-11	1.21696e-09	Sostdc1
ENSMUSG00000033470	41.3639	-3.80938	0.583503	-6.52848	6.64426e-11	1.226e-09	Cysltr2
ENSMUSG00000036646	1794.05	-0.392107	0.0600727	-6.52722	6.70019e-11	1.23354e-09	Man1b1
ENSMUSG00000040327	120.437	-1.8906	0.289738	-6.5252	6.79112e-11	1.24934e-09	Cul9
ENSMUSG00000025241	931.063	-1.23995	0.190164	-6.52043	7.01073e-11	1.28589e-09	Fyco1
ENSMUSG00000041681	9.80035	-5.13183	0.787053	-6.5203	7.01658e-11	1.28601e-09	Iapp
ENSMUSG00000048895	96.2564	-2.47798	0.380078	-6.51966	7.04651e-11	1.29053e-09	Cdk5r1
ENSMUSG00000030246	4872.98	-1.55146	0.237989	-6.51906	7.07497e-11	1.29478e-09	Ldhb
ENSMUSG00000029714	2095.25	-0.764503	0.117311	-6.51688	7.17838e-11	1.31273e-09	Gigyf1
ENSMUSG00000035283	20.2273	-1.971	0.302522	-6.51524	7.25733e-11	1.32618e-09	Adrb1
ENSMUSG00000021566	4.09936	-3.96133	0.608453	-6.5105	7.49e-11	1.36666e-09	Slc6a19os
ENSMUSG00000020038	912.534	-1.18473	0.182035	-6.50826	7.6027e-11	1.3862e-09	Cry1
ENSMUSG00000096900	4.02412	-4.35667	0.669472	-6.50762	7.63515e-11	1.39108e-09	Trav9-1
ENSMUSG00000022237	62.2723	-2.72176	0.418328	-6.50627	7.70421e-11	1.40262e-09	Ankrd33b
ENSMUSG00000038593	316.834	-0.602847	0.0927239	-6.50152	7.9511e-11	1.44543e-09	Tctn1
ENSMUSG00000106205	38.7459	-1.61789	0.24908	-6.49549	8.27642e-11	1.49682e-09	C230096K16Rik
ENSMUSG00000037490	17.4121	-2.88489	0.444428	-6.49123	8.51358e-11	1.53632e-09	Slc2a12
ENSMUSG00000026031	801.801	-1.21313	0.18694	-6.48941	8.61711e-11	1.55386e-09	Cflar
ENSMUSG00000105096	11.9821	-3.12588	0.481736	-6.48878	8.65366e-11	1.55853e-09	Gbp10
ENSMUSG00000037548	217.195	-2.72151	0.41942	-6.48874	8.6557e-11	1.55853e-09	H2-DMb2
ENSMUSG00000051506	606.033	-2.32241	0.358003	-6.48712	8.74924e-11	1.57353e-09	Wdfy4
ENSMUSG00000100658	16.6965	-2.91019	0.448721	-6.48552	8.84257e-11	1.58869e-09	F730311O21Rik
ENSMUSG00000025357	4372.62	-2.07517	0.319993	-6.48505	8.87041e-11	1.59253e-09	Dgka
ENSMUSG00000034445	288.346	-1.08442	0.167248	-6.4839	8.93819e-11	1.60352e-09	Cyb561a3
ENSMUSG00000032338	13.782	-3.49553	0.539128	-6.48368	8.951e-11	1.60465e-09	Hcn4
ENSMUSG00000051682	42.8068	-2.96617	0.457641	-6.48144	9.085e-11	1.6263e-09	Treml4
ENSMUSG00000015476	1719.05	-1.47642	0.227861	-6.47949	9.20353e-11	1.64512e-09	Prrt1
ENSMUSG00000055546	163.601	-3.13616	0.484033	-6.47923	9.21912e-11	1.64602e-09	Timd4
ENSMUSG00000034177	72.2628	-2.08103	0.321187	-6.47919	9.22193e-11	1.64602e-09	Rnf43
ENSMUSG00000030409	198.331	-1.9661	0.303476	-6.47858	9.25914e-11	1.65146e-09	Dmpk
ENSMUSG00000074199	29.1061	-4.71858	0.728387	-6.47813	9.28678e-11	1.65519e-09	Krtdap
ENSMUSG00000063430	14.0511	-3.61643	0.558294	-6.47763	9.31725e-11	1.65821e-09	Wscd2
ENSMUSG00000076911	4.11799	-3.59789	0.555502	-6.47682	9.36755e-11	1.66596e-09	Traj18
ENSMUSG00000025938	48.3805	-4.26681	0.65891	-6.47556	9.44607e-11	1.67628e-09	Slco5a1
ENSMUSG00000034563	63.483	-1.12829	0.174243	-6.47537	9.45809e-11	1.67721e-09	Ccpg1
ENSMUSG00000040329	95.3484	-3.23834	0.500241	-6.47355	9.57267e-11	1.6913e-09	Il7
ENSMUSG00000036362	120.987	-1.88755	0.291574	-6.47364	9.56685e-11	1.6913e-09	P2ry13
ENSMUSG00000001507	117.364	-1.5555	0.240335	-6.4722	9.65865e-11	1.70417e-09	Itga3
ENSMUSG00000039339	2.99571	-4.36064	0.673799	-6.47173	9.68852e-11	1.70699e-09	Mfsd4b2
ENSMUSG00000024957	3.42685	-3.90492	0.603373	-6.47182	9.68312e-11	1.70699e-09	Kcnk4
ENSMUSG00000038354	32.9405	-2.96676	0.458476	-6.47091	9.74159e-11	1.71443e-09	Ankrd35
ENSMUSG00000031153	1122.67	-0.731601	0.113068	-6.47044	9.77155e-11	1.71792e-09	Gripap1
ENSMUSG00000073295	5.2385	-3.40476	0.52622	-6.47023	9.78535e-11	1.71912e-09	Nudt11
ENSMUSG00000029684	438.153	-0.868839	0.134315	-6.46865	9.88843e-11	1.73475e-09	Wasl
ENSMUSG00000083811	9.57649	-1.80554	0.279953	-6.44943	1.1227e-10	1.96117e-09	Gm13071
ENSMUSG00000028992	230.343	-1.49424	0.231705	-6.44888	1.1268e-10	1.96694e-09	Nmnat1
ENSMUSG00000022947	104.512	-2.32624	0.36075	-6.44835	1.13076e-10	1.97245e-09	Cbr3
ENSMUSG00000029016	850.354	-0.888407	0.137796	-6.44728	1.13873e-10	1.98495e-09	Clcn6
ENSMUSG00000024972	136.39	-4.60441	0.714892	-6.44071	1.18917e-10	2.06554e-09	Lgals12
ENSMUSG00000107726	50.9351	-1.87788	0.291713	-6.43744	1.21502e-10	2.10746e-09	Gm44037
ENSMUSG00000102955	21.1269	-4.95905	0.77076	-6.43397	1.24315e-10	2.15322e-09	Trbv24
ENSMUSG00000053647	5.19534	-2.92678	0.454918	-6.43363	1.2459e-10	2.15646e-09	Gper1
ENSMUSG00000091264	519.419	-0.984002	0.153045	-6.42951	1.2802e-10	2.21133e-09	Smim13
ENSMUSG00000038828	810.77	-0.469858	0.0730786	-6.42949	1.2803e-10	2.21133e-09	Tmem214
ENSMUSG00000025082	8.11564	-3.74957	0.583572	-6.42521	1.31688e-10	2.27291e-09	Vwa2
ENSMUSG00000027244	1067.62	-0.4159	0.0647399	-6.42417	1.32591e-10	2.2869e-09	Atg13
ENSMUSG00000109901	1312.91	-0.900141	0.140136	-6.42332	1.33336e-10	2.29652e-09	Chmp1b
ENSMUSG00000096551	4.17116	-4.39989	0.685646	-6.41715	1.38853e-10	2.38319e-09	Trav10
ENSMUSG00000114652	3.62603	-3.96294	0.617702	-6.41561	1.40259e-10	2.40397e-09	AC107663,2
ENSMUSG00000076890	2.24483	-4.11627	0.642099	-6.41064	1.44906e-10	2.47842e-09	Traj40
ENSMUSG00000002983	312.369	-1.75072	0.273105	-6.41041	1.45129e-10	2.48021e-09	Relb
ENSMUSG00000028347	29.1363	-3.05866	0.477283	-6.40848	1.46981e-10	2.50868e-09	Tmeff1
ENSMUSG00000041567	4.61051	-4.98716	0.77831	-6.40768	1.47746e-10	2.51999e-09	Serpina12
ENSMUSG00000039063	27.8409	-3.2567	0.508517	-6.40432	1.51043e-10	2.5691e-09	Echdc3
ENSMUSG00000076898	4.7055	-3.50955	0.548135	-6.40271	1.52647e-10	2.59457e-09	Traj31
ENSMUSG00000035697	15272	-1.21364	0.189577	-6.40181	1.53545e-10	2.60804e-09	Arhgap45
ENSMUSG00000031647	21.9956	-2.90159	0.453404	-6.39957	1.55811e-10	2.64105e-09	Mfap3l
ENSMUSG00000023952	1857.19	-0.867656	0.1356	-6.39865	1.56759e-10	2.65346e-09	Gtpbp2
ENSMUSG00000090494	2.87925	-4.27648	0.668411	-6.39798	1.57446e-10	2.66326e-09	Traj36
ENSMUSG00000027712	1960.89	-1.449	0.226495	-6.3975	1.5794e-10	2.66978e-09	Anxa5
ENSMUSG00000043088	45.9212	-2.88079	0.450441	-6.39549	1.60033e-10	2.7033e-09	Il17re
ENSMUSG00000031767	168.555	-3.97657	0.62251	-6.38796	1.68111e-10	2.83584e-09	Nudt7
ENSMUSG00000040471	7.27966	-2.81088	0.440223	-6.38514	1.71245e-10	2.88673e-09	Ggt6
ENSMUSG00000096149	3.89394	-3.54238	0.554853	-6.38436	1.72114e-10	2.89939e-09	Trav6-5
ENSMUSG00000061144	3.86211	-4.52255	0.708504	-6.38324	1.73378e-10	2.91869e-09	Spink12
ENSMUSG00000021775	564.768	-1.46636	0.229804	-6.38092	1.76023e-10	2.96118e-09	Nr1d2
ENSMUSG00000035498	55.8484	-3.64003	0.570504	-6.38038	1.76651e-10	2.96972e-09	Cdcp1
ENSMUSG00000054061	1.57998	-4.34856	0.681612	-6.37981	1.77303e-10	2.97661e-09	Gm9934
ENSMUSG00000020275	240.893	-1.35209	0.211936	-6.37969	1.77442e-10	2.97691e-09	Rel
ENSMUSG00000096329	3.09839	-3.96163	0.621417	-6.37516	1.82774e-10	3.06219e-09	Trav13d-4
ENSMUSG00000091311	3.29746	-4.72614	0.741872	-6.37056	1.88335e-10	3.15106e-09	Spata31d1b
ENSMUSG00000043681	9.14465	-5.03365	0.790267	-6.36955	1.89581e-10	3.16975e-09	Fam25c
ENSMUSG00000041117	41.7567	-2.2926	0.360055	-6.36735	1.9232e-10	3.21336e-09	Ccdc8
ENSMUSG00000040197	4.35833	-4.26388	0.670272	-6.36141	1.99905e-10	3.33329e-09	Cd209e
ENSMUSG00000078772	5.0993	-2.51018	0.394723	-6.35935	2.02613e-10	3.37614e-09	Gm12353
ENSMUSG00000061859	697.854	-2.72802	0.4292	-6.35605	2.07013e-10	3.44014e-09	Patj
ENSMUSG00000106157	19.1352	-2.49243	0.392327	-6.35294	2.11236e-10	3.50795e-09	4930555A03Rik
ENSMUSG00000004113	18.4651	-3.0103	0.473896	-6.35224	2.122e-10	3.52157e-09	Cacna1b
ENSMUSG00000036890	330.009	-1.27269	0.200602	-6.34438	2.2333e-10	3.68884e-09	Gtdc1
ENSMUSG00000058690	765.884	-0.967815	0.152591	-6.34255	2.25987e-10	3.73023e-09	Ccser2
ENSMUSG00000036925	5.36178	-4.58164	0.722473	-6.34161	2.27377e-10	3.75065e-09	Mucl2
ENSMUSG00000024897	84.9634	-2.2278	0.351696	-6.33445	2.38186e-10	3.92106e-09	Apba1
ENSMUSG00000020676	61.59	-2.64371	0.417595	-6.33079	2.43903e-10	4.00444e-09	Ccl11
ENSMUSG00000053528	2.36581	-4.46126	0.705426	-6.3242	2.54545e-10	4.17358e-09	A530021J07Rik
ENSMUSG00000020034	744.655	-1.82109	0.288093	-6.32121	2.59518e-10	4.24946e-09	Tcp11l2
ENSMUSG00000031119	66.5227	-1.96738	0.311362	-6.31861	2.63926e-10	4.31301e-09	Gpc4
ENSMUSG00000029647	3448.47	-0.879936	0.139375	-6.31346	2.72859e-10	4.45011e-09	Pan3
ENSMUSG00000038526	27.0194	-3.01806	0.478176	-6.31161	2.76148e-10	4.49779e-09	Car14
ENSMUSG00000076901	4.95825	-3.85064	0.61019	-6.31055	2.78048e-10	4.52573e-09	Traj28
ENSMUSG00000105963	10.2488	-4.73705	0.750695	-6.31022	2.78638e-10	4.53234e-09	Gm43647
ENSMUSG00000025665	8.86119	-3.44699	0.546359	-6.30903	2.80795e-10	4.56138e-09	Rps6ka6
ENSMUSG00000025383	10.5648	-2.88522	0.457337	-6.30874	2.81321e-10	4.56691e-09	Il23a
ENSMUSG00000002459	9.03585	-3.91644	0.621297	-6.30365	2.90708e-10	4.71308e-09	Rgs20
ENSMUSG00000049109	5008.69	-1.41522	0.224523	-6.30323	2.91497e-10	4.72276e-09	Themis
ENSMUSG00000092443	2.48329	-4.30906	0.683883	-6.30088	2.95968e-10	4.78888e-09	Gm20726
ENSMUSG00000033765	13.7088	-4.70921	0.747529	-6.2997	2.98216e-10	4.8189e-09	Calm4
ENSMUSG00000109715	239.382	-1.40444	0.223179	-6.29289	3.11616e-10	5.02553e-09	Gm45606
ENSMUSG00000085903	485.861	-3.52743	0.560743	-6.29063	3.16173e-10	5.08899e-09	Gm15340
ENSMUSG00000029571	1237.77	-0.832716	0.13245	-6.28703	3.23601e-10	5.19495e-09	Tmem106b
ENSMUSG00000028467	1131.54	-0.990869	0.157625	-6.28625	3.25221e-10	5.21754e-09	Gba2
ENSMUSG00000022507	817.06	-0.879379	0.139902	-6.28568	3.26422e-10	5.2334e-09	1810013L24Rik
ENSMUSG00000038648	307.218	-1.76796	0.281531	-6.27979	3.39029e-10	5.41082e-09	Creb3l2
ENSMUSG00000091512	739.145	-0.505795	0.080542	-6.27988	3.3883e-10	5.41082e-09	Lamtor3
ENSMUSG00000001542	103.492	-2.48165	0.39525	-6.27868	3.41449e-10	5.44591e-09	Ell2
ENSMUSG00000061536	545.543	-0.844224	0.134545	-6.27466	3.50406e-10	5.5779e-09	Sec22c
ENSMUSG00000069893	19.1973	-2.3474	0.374404	-6.26969	3.6176e-10	5.74376e-09	9930111J21Rik1
ENSMUSG00000067767	2.99936	-3.91877	0.625047	-6.26956	3.62073e-10	5.74501e-09	Clec4b2
ENSMUSG00000038264	1007.79	-0.705125	0.112511	-6.26718	3.6764e-10	5.82207e-09	Sema7a
ENSMUSG00000057092	80.3744	-3.38261	0.539794	-6.26649	3.69277e-10	5.84048e-09	Fxyd3
ENSMUSG00000027560	8.22367	-3.25901	0.520066	-6.26654	3.69151e-10	5.84048e-09	Dok5
ENSMUSG00000029217	480.63	-1.10679	0.176678	-6.26446	3.74109e-10	5.91309e-09	Tec
ENSMUSG00000068250	158.822	-0.962992	0.153904	-6.25709	3.92216e-10	6.18606e-09	Amn1
ENSMUSG00000022382	30.0017	-3.26816	0.523266	-6.24568	4.21958e-10	6.60987e-09	Wnt7b
ENSMUSG00000034341	2010.82	-0.646053	0.103465	-6.24417	4.26044e-10	6.66538e-09	Wbp2
ENSMUSG00000059956	9.22809	-4.02283	0.644374	-6.243	4.29252e-10	6.7113e-09	Serpinb12
ENSMUSG00000026479	199.372	-2.8476	0.456145	-6.24276	4.2992e-10	6.71319e-09	Lamc2
ENSMUSG00000070501	62.734	-2.51404	0.403002	-6.23828	4.42412e-10	6.90388e-09	Ifi214
ENSMUSG00000027376	42.2484	-4.26794	0.684979	-6.23075	4.64206e-10	7.20736e-09	Prom2
ENSMUSG00000037736	166.44	-2.62279	0.421324	-6.22513	4.81167e-10	7.45187e-09	Limch1
ENSMUSG00000047735	1172.73	-1.36824	0.21982	-6.22435	4.83563e-10	7.48426e-09	Samd9l
ENSMUSG00000079110	942.158	-1.5841	0.254891	-6.21482	5.13838e-10	7.93784e-09	Capn3
ENSMUSG00000051285	775.66	-1.3767	0.221558	-6.21373	5.17415e-10	7.98808e-09	Pcmtd1
ENSMUSG00000040606	94.5078	-2.06822	0.332882	-6.21308	5.19572e-10	8.01245e-09	Kazn
ENSMUSG00000026131	1536.55	-2.18425	0.351624	-6.2119	5.23472e-10	8.06323e-09	Dst
ENSMUSG00000054150	508.995	-1.41981	0.228579	-6.21145	5.2499e-10	8.07965e-09	Syne3
ENSMUSG00000068617	5.06684	-3.2747	0.527315	-6.21015	5.29345e-10	8.13649e-09	Efcab1
ENSMUSG00000023019	3243.4	-4.81365	0.775375	-6.20816	5.36096e-10	8.23511e-09	Gpd1
ENSMUSG00000072966	64.7351	-2.93129	0.472509	-6.20368	5.51594e-10	8.45204e-09	Gprasp2
ENSMUSG00000039531	314.513	-0.768342	0.123856	-6.20351	5.52161e-10	8.45547e-09	Zufsp
ENSMUSG00000021123	55.7464	-2.39833	0.386633	-6.20312	5.53536e-10	8.47124e-09	Rdh12
ENSMUSG00000084993	35.2873	-1.99139	0.321096	-6.20185	5.58026e-10	8.52933e-09	Gm12305
ENSMUSG00000027217	151.38	-3.54067	0.571446	-6.19598	5.79239e-10	8.8316e-09	Tspan18
ENSMUSG00000031434	34.4757	-2.68065	0.432672	-6.19556	5.80767e-10	8.8494e-09	Morc4
ENSMUSG00000022636	212.513	-2.7824	0.44916	-6.19468	5.84053e-10	8.89397e-09	Alcam
ENSMUSG00000085793	312.946	-0.718587	0.116058	-6.1916	5.95574e-10	9.06379e-09	Lin52
ENSMUSG00000079076	39.5819	-2.22045	0.358694	-6.19037	6.00247e-10	9.12361e-09	Gm3086
ENSMUSG00000026327	6.20692	-4.59619	0.742618	-6.18918	6.04799e-10	9.18144e-09	Serpinb11
ENSMUSG00000017734	9.69229	-1.67974	0.271498	-6.18696	6.13373e-10	9.30012e-09	Dbndd2
ENSMUSG00000030557	1601.9	-1.45775	0.235721	-6.18422	6.24091e-10	9.43933e-09	Mef2a
ENSMUSG00000038178	2622.67	-1.23497	0.199814	-6.18062	6.38523e-10	9.64574e-09	Slc43a2
ENSMUSG00000078612	27.7085	-2.98013	0.482378	-6.17798	6.49253e-10	9.8018e-09	Fyb2
ENSMUSG00000042662	11.2815	-4.27895	0.692697	-6.17723	6.52362e-10	9.84269e-09	Dusp15
ENSMUSG00000110058	2.88154	-4.05684	0.656776	-6.1769	6.53727e-10	9.85725e-09	Gm5907
ENSMUSG00000052137	246.165	-1.15398	0.186936	-6.1731	6.69651e-10	1.00912e-08	Rbm12b2
ENSMUSG00000020589	354.961	-1.38713	0.224742	-6.17209	6.73934e-10	1.01495e-08	Fam49a
ENSMUSG00000009621	969.535	-0.836505	0.135553	-6.17108	6.78266e-10	1.02085e-08	Vav2
ENSMUSG00000015354	38.2296	-2.47361	0.401014	-6.16838	6.89931e-10	1.0365e-08	Pcolce2
ENSMUSG00000076902	3.06472	-3.93018	0.637284	-6.16708	6.95641e-10	1.04444e-08	Traj27
ENSMUSG00000017652	88.7051	-2.92337	0.474652	-6.15897	7.32193e-10	1.09664e-08	Cd40
ENSMUSG00000026490	199.769	-2.03239	0.33022	-6.15466	7.52368e-10	1.12617e-08	Cdc42bpa
ENSMUSG00000104810	3.24995	-3.40199	0.552874	-6.15328	7.58988e-10	1.13401e-08	Gm5684
ENSMUSG00000040183	492.329	-3.13996	0.51068	-6.14859	7.81737e-10	1.16516e-08	Ankrd6
ENSMUSG00000053192	247.932	-1.08503	0.176474	-6.14837	7.8285e-10	1.16611e-08	Mllt11
ENSMUSG00000022967	1749.19	-0.789874	0.128573	-6.14339	8.07799e-10	1.20109e-08	Ifnar1
ENSMUSG00000019966	150.213	-2.14619	0.349493	-6.14086	8.20762e-10	1.21816e-08	Kitl
ENSMUSG00000031024	224.377	-2.0129	0.327924	-6.1383	8.34102e-10	1.23631e-08	St5
ENSMUSG00000030670	4.78906	-2.83272	0.461588	-6.13689	8.41518e-10	1.24445e-08	Cyp2r1
ENSMUSG00000028381	1282.62	-0.777063	0.12662	-6.13696	8.41178e-10	1.24445e-08	Ugcg
ENSMUSG00000053318	43.8309	-2.09186	0.341081	-6.13303	8.62235e-10	1.27432e-08	Slamf8
ENSMUSG00000042444	819.162	-1.39443	0.227385	-6.13244	8.65417e-10	1.27826e-08	Mindy2
ENSMUSG00000090387	3.63439	-3.98716	0.650203	-6.13217	8.66872e-10	1.27964e-08	Gm17056
ENSMUSG00000072944	5.29319	-3.46759	0.565544	-6.13142	8.70992e-10	1.28418e-08	Nup62cl
ENSMUSG00000103779	78.8041	-2.18381	0.356248	-6.13003	8.78632e-10	1.29467e-08	Gm36931
ENSMUSG00000086513	24.8672	-3.09876	0.505688	-6.12782	8.90894e-10	1.31116e-08	9130208D14Rik
ENSMUSG00000073590	6.25337	-2.16824	0.353933	-6.12614	9.00371e-10	1.32432e-08	3222401L13Rik
ENSMUSG00000022629	69.5029	-3.00991	0.491587	-6.12284	9.19244e-10	1.34965e-08	Kif21a
ENSMUSG00000031072	429.01	-0.481772	0.078723	-6.11983	9.36729e-10	1.3745e-08	Oraov1
ENSMUSG00000060843	7.13581	-4.26479	0.696957	-6.11916	9.40706e-10	1.37869e-08	Ctnna3
ENSMUSG00000061311	21495.1	-3.79291	0.619943	-6.11816	9.4661e-10	1.38652e-08	Rag1
ENSMUSG00000072952	1.84456	-4.08599	0.668256	-6.11441	9.69172e-10	1.41535e-08	Gm5878
ENSMUSG00000068154	21.5325	-4.56961	0.747381	-6.11416	9.70638e-10	1.41665e-08	Insm1
ENSMUSG00000031712	42.4031	-2.33476	0.382034	-6.1114	9.87625e-10	1.43888e-08	Il15
ENSMUSG00000053702	1553.82	-2.67217	0.437349	-6.10993	9.96753e-10	1.45046e-08	Nebl
ENSMUSG00000040489	2.02264	-3.98983	0.653081	-6.10924	1.00107e-09	1.45502e-08	Sox30
ENSMUSG00000036585	157.69	-2.51024	0.411064	-6.10668	1.01727e-09	1.47681e-08	Fgf1
ENSMUSG00000042306	119.814	-4.51201	0.739047	-6.10517	1.02693e-09	1.48732e-08	S100a14
ENSMUSG00000103753	53.7145	-1.75481	0.287562	-6.10239	1.04496e-09	1.51077e-08	Gm6934
ENSMUSG00000020740	1557.6	-0.739097	0.121118	-6.10226	1.04577e-09	1.51104e-08	Gga3
ENSMUSG00000018849	51.7799	-3.21648	0.527198	-6.10108	1.05356e-09	1.52141e-08	Wwc1
ENSMUSG00000100711	10.4657	-4.41552	0.72399	-6.09886	1.06827e-09	1.54085e-08	Gm29461
ENSMUSG00000027303	1905.23	-0.610443	0.100106	-6.09798	1.07415e-09	1.54659e-08	Ptpra
ENSMUSG00000036533	280.985	-1.91733	0.31446	-6.09721	1.07937e-09	1.55321e-08	Cdc42ep3
ENSMUSG00000024411	17.9749	-3.18828	0.523013	-6.09597	1.08773e-09	1.56432e-08	Aqp4
ENSMUSG00000100546	7.11841	-4.49792	0.737877	-6.09576	1.08921e-09	1.56554e-08	Gm29483
ENSMUSG00000030149	16.0823	-3.65563	0.600053	-6.09217	1.11389e-09	1.59726e-08	Klrk1
ENSMUSG00000032262	4.77349	-2.85232	0.468246	-6.09149	1.11866e-09	1.60317e-08	Elovl4
ENSMUSG00000000605	1225.23	-0.777233	0.127646	-6.08895	1.13654e-09	1.62501e-08	Clcn4
ENSMUSG00000041695	27.4482	-2.29441	0.376954	-6.08671	1.15255e-09	1.64598e-08	Kcnj2
ENSMUSG00000028758	7.57534	-1.94141	0.319258	-6.08099	1.19442e-09	1.70381e-08	Kif17
ENSMUSG00000097785	42.5035	-1.10011	0.180931	-6.08027	1.19978e-09	1.71045e-08	B230217O12Rik
ENSMUSG00000027583	66.7124	-1.84628	0.303785	-6.07759	1.22004e-09	1.73731e-08	Zbtb46
ENSMUSG00000032291	3.71095	-3.81248	0.627399	-6.07665	1.22721e-09	1.74651e-08	Crabp1
ENSMUSG00000076912	5.22157	-3.08134	0.507101	-6.07638	1.22925e-09	1.74841e-08	Traj17
ENSMUSG00000027210	109.557	-2.40031	0.395044	-6.07607	1.23167e-09	1.75084e-08	Meis2
ENSMUSG00000067438	3.21849	-4.22028	0.694807	-6.07403	1.24736e-09	1.77006e-08	Hmx1
ENSMUSG00000038418	992.469	-2.63698	0.434322	-6.07148	1.26735e-09	1.79532e-08	Egr1
ENSMUSG00000100937	17.9703	-1.29299	0.213	-6.07039	1.27596e-09	1.80649e-08	1700020D05Rik
ENSMUSG00000037032	55.9816	-1.8785	0.309595	-6.06762	1.29821e-09	1.83693e-08	Apbb1
ENSMUSG00000044156	20.166	-2.57716	0.424804	-6.0667	1.30568e-09	1.84643e-08	Hepacam2
ENSMUSG00000062866	144.292	-1.85416	0.305796	-6.0634	1.33271e-09	1.88142e-08	Phactr2
ENSMUSG00000018750	481.656	-1.57996	0.260606	-6.06263	1.33911e-09	1.88936e-08	Zbtb4
ENSMUSG00000013275	1112.01	-1.34266	0.221578	-6.05955	1.36502e-09	1.92371e-08	Slc41a1
ENSMUSG00000006127	2108.21	-0.81961	0.135276	-6.0588	1.37138e-09	1.93157e-08	Inpp5k
ENSMUSG00000029368	29.386	-6.60938	1.09118	-6.05707	1.38623e-09	1.95137e-08	Alb
ENSMUSG00000030278	833.059	-4.57265	0.754974	-6.0567	1.38942e-09	1.95421e-08	Cidec
ENSMUSG00000094562	2.96062	-3.87696	0.640476	-6.05326	1.41947e-09	1.99473e-08	Trav13-4-dv7
ENSMUSG00000039745	15.9531	-3.17737	0.524939	-6.05283	1.42326e-09	1.9989e-08	Htatip2
ENSMUSG00000029413	484.275	-1.24432	0.205626	-6.05136	1.43624e-09	2.01369e-08	Naaa
ENSMUSG00000049804	98.9836	-1.91608	0.316856	-6.04716	1.47423e-09	2.06225e-08	Armcx4
ENSMUSG00000030095	1298.69	-0.841339	0.139216	-6.04341	1.50894e-09	2.10721e-08	Tmem43
ENSMUSG00000038167	29.3286	-2.13984	0.354117	-6.04276	1.51499e-09	2.11445e-08	Plekhg6
ENSMUSG00000031099	13.0812	-2.25761	0.373981	-6.0367	1.57298e-09	2.19165e-08	Smarca1
ENSMUSG00000030729	577.21	-1.6668	0.27617	-6.03542	1.58549e-09	2.20783e-08	Pgm2l1
ENSMUSG00000021136	916.616	-3.86778	0.640894	-6.03498	1.5898e-09	2.21258e-08	Smoc1
ENSMUSG00000018566	360.959	-4.14059	0.686351	-6.03275	1.61193e-09	2.2421e-08	Slc2a4
ENSMUSG00000057163	42.3371	-4.5581	0.755606	-6.03237	1.61571e-09	2.2461e-08	Prss2
ENSMUSG00000030643	34.8845	-1.92112	0.318687	-6.02822	1.65777e-09	2.29807e-08	Rab30
ENSMUSG00000031250	4.93331	-3.62543	0.601928	-6.02303	1.71184e-09	2.369e-08	Tnmd
ENSMUSG00000028460	973.998	-1.33458	0.221805	-6.0169	1.77787e-09	2.45624e-08	Sit1
ENSMUSG00000030217	189.322	-1.9147	0.318485	-6.01189	1.83371e-09	2.52628e-08	Art4
ENSMUSG00000006920	821.83	-0.812331	0.135124	-6.01173	1.83553e-09	2.52738e-08	Ezh1
ENSMUSG00000037686	87.2645	-4.79762	0.798258	-6.01012	1.85389e-09	2.54929e-08	Aspg
ENSMUSG00000044309	73.9222	-4.32208	0.719143	-6.01005	1.8547e-09	2.54929e-08	Apol7c
ENSMUSG00000029864	141.367	-2.27367	0.378316	-6.00997	1.85559e-09	2.54929e-08	Gstk1
ENSMUSG00000022604	1120.24	-1.06951	0.178106	-6.00489	1.91462e-09	2.62891e-08	Cep97
ENSMUSG00000039943	173.43	-2.0731	0.345269	-6.00431	1.92146e-09	2.63683e-08	Plcb4
ENSMUSG00000035342	179.594	-1.94573	0.324079	-6.0039	1.92638e-09	2.64211e-08	Lzts2
ENSMUSG00000034459	191.214	-2.75183	0.458528	-6.00144	1.95571e-09	2.67786e-08	Ifit1
ENSMUSG00000021785	738.619	-0.876008	0.146139	-5.99435	2.04301e-09	2.79116e-08	Ngly1
ENSMUSG00000037129	5.67082	-3.71271	0.619649	-5.99163	2.07753e-09	2.83517e-08	Tmprss13
ENSMUSG00000053110	225.406	-2.15114	0.359037	-5.99141	2.08028e-09	2.83735e-08	Yap1
ENSMUSG00000063157	18.7192	-4.14342	0.692004	-5.98757	2.13003e-09	2.9036e-08	Csn2
ENSMUSG00000042372	14.4339	-4.12917	0.689697	-5.98693	2.13845e-09	2.91346e-08	Dmrt3
ENSMUSG00000042115	65.7144	-3.20755	0.535898	-5.98537	2.15895e-09	2.93976e-08	Klhdc8a
ENSMUSG00000023968	240.174	-5.26722	0.880375	-5.98293	2.19156e-09	2.98252e-08	Crip3
ENSMUSG00000022124	1247	-0.700244	0.117065	-5.98166	2.20879e-09	3.0043e-08	Fbxl3
ENSMUSG00000023987	4.66253	-4.16421	0.696504	-5.97873	2.24888e-09	3.05713e-08	Pgc
ENSMUSG00000039159	1967.93	-0.936317	0.156643	-5.97738	2.26749e-09	3.07903e-08	Ube2h
ENSMUSG00000027315	155.933	-3.80811	0.637246	-5.97588	2.28847e-09	3.10409e-08	Spint1
ENSMUSG00000059887	1.82085	-4.07173	0.681415	-5.9754	2.29521e-09	3.1115e-08	Olfr1507
ENSMUSG00000076923	14.1096	-3.87332	0.648279	-5.97478	2.30408e-09	3.12181e-08	Traj5
ENSMUSG00000039059	30.7822	-3.2899	0.551343	-5.96706	2.41565e-09	3.26577e-08	Hrh3
ENSMUSG00000039318	960.306	-0.576122	0.0965653	-5.96613	2.4294e-09	3.28256e-08	Rab3gap2
ENSMUSG00000021187	4.88722	-2.72318	0.456827	-5.96109	2.50566e-09	3.37668e-08	Tc2n
ENSMUSG00000062753	200.988	-1.21668	0.204181	-5.95883	2.54048e-09	3.41949e-08	AI413582
ENSMUSG00000046743	57.8325	-2.0338	0.341323	-5.95858	2.54436e-09	3.42097e-08	Fat4
ENSMUSG00000091971	23.7673	-2.4227	0.406792	-5.95561	2.59104e-09	3.47993e-08	Hspa1a
ENSMUSG00000021411	99.843	-1.9708	0.330937	-5.95521	2.59735e-09	3.48649e-08	Pxdc1
ENSMUSG00000087301	1.79358	-4.52126	0.759504	-5.95292	2.63406e-09	3.53384e-08	Gm13629
ENSMUSG00000031328	8049.67	-0.772706	0.129842	-5.95114	2.66286e-09	3.56858e-08	Flna
ENSMUSG00000024990	53.9372	-4.53872	0.762836	-5.94979	2.68489e-09	3.59614e-08	Rbp4
ENSMUSG00000026012	183.157	-2.40105	0.404005	-5.94312	2.7965e-09	3.73952e-08	Cd28
ENSMUSG00000021066	29.6729	-1.50616	0.253773	-5.93507	2.93728e-09	3.915e-08	Atl1
ENSMUSG00000050241	4.94761	-3.88233	0.654436	-5.93232	2.98679e-09	3.97882e-08	Klre1
ENSMUSG00000020734	12.6617	-2.59722	0.437945	-5.93048	3.02051e-09	4.02157e-08	Grin2c
ENSMUSG00000050276	12.2988	-4.54176	0.765862	-5.93026	3.02455e-09	4.02477e-08	Mrgprg
ENSMUSG00000111761	3.97025	-4.15669	0.700989	-5.92975	3.0339e-09	4.03502e-08	AC112680,3
ENSMUSG00000051107	14.3304	-1.84117	0.310551	-5.92871	3.0532e-09	4.0563e-08	Gm15440
ENSMUSG00000060771	127.786	-1.57569	0.265955	-5.92466	3.12941e-09	4.15306e-08	Tsga10
ENSMUSG00000075415	3367.11	-0.882916	0.149047	-5.92376	3.14669e-09	4.17374e-08	Fnbp1
ENSMUSG00000020220	2012.56	-0.992462	0.167543	-5.92362	3.1493e-09	4.17495e-08	Vps13d
ENSMUSG00000022054	49.6705	-5.23483	0.883938	-5.92217	3.17714e-09	4.20958e-08	Nefm
ENSMUSG00000040165	3.93283	-4.53435	0.766124	-5.91857	3.2476e-09	4.29831e-08	Cd209c
ENSMUSG00000060985	546.236	-1.97757	0.33449	-5.9122	3.3756e-09	4.45572e-08	Tdrd5
ENSMUSG00000033545	5954.79	-1.25422	0.21218	-5.9111	3.39822e-09	4.48318e-08	Znrf1
ENSMUSG00000024669	2003	-2.38586	0.403658	-5.9106	3.40869e-09	4.49457e-08	Cd5
ENSMUSG00000102562	3.58855	-3.73775	0.632575	-5.90878	3.44655e-09	4.53476e-08	Gm37694
ENSMUSG00000036840	334.389	-0.761478	0.128901	-5.90748	3.47371e-09	4.5656e-08	Siah1a
ENSMUSG00000050195	23.7102	-2.45606	0.415921	-5.90511	3.5241e-09	4.62937e-08	Scd4
ENSMUSG00000103358	71.8984	-2.08721	0.353556	-5.90347	3.55928e-09	4.67308e-08	Gm37593
ENSMUSG00000041890	2976.36	-0.755555	0.127991	-5.9032	3.56519e-09	4.67834e-08	Git2
ENSMUSG00000026576	888.679	-1.09905	0.186268	-5.90039	3.62645e-09	4.75111e-08	Atp1b1
ENSMUSG00000025409	1536.1	-0.626544	0.106198	-5.89978	3.63988e-09	4.76616e-08	Mbd6
ENSMUSG00000069171	20.2909	-1.79498	0.304338	-5.898	3.67937e-09	4.81274e-08	Nr2f1
ENSMUSG00000041836	501.062	-0.983962	0.16705	-5.89021	3.85701e-09	5.03172e-08	Ptpre
ENSMUSG00000072571	21.7271	-1.28452	0.218423	-5.88087	4.08117e-09	5.31005e-08	Tmem253
ENSMUSG00000063531	7.35224	-2.29889	0.391	-5.87951	4.11486e-09	5.35106e-08	Sema3e
ENSMUSG00000028906	4172.16	-1.21357	0.206448	-5.87833	4.14421e-09	5.38069e-08	Epb41
ENSMUSG00000028468	1220.62	-0.776708	0.132146	-5.87767	4.1609e-09	5.39665e-08	Rgp1
ENSMUSG00000002996	1514.81	-1.18638	0.201881	-5.87665	4.18648e-09	5.42441e-08	Hbp1
ENSMUSG00000027340	889.065	-1.07886	0.183585	-5.87664	4.18671e-09	5.42441e-08	Slc23a2
ENSMUSG00000070047	241.574	-1.65731	0.282099	-5.87493	4.23018e-09	5.47496e-08	Fat1
ENSMUSG00000045410	86.6593	-2.27385	0.387116	-5.87383	4.25849e-09	5.50869e-08	Akr1e1
ENSMUSG00000034829	9.72918	-5.46867	0.932271	-5.86597	4.46519e-09	5.75487e-08	Nxnl1
ENSMUSG00000032519	354.81	-0.896202	0.152866	-5.86267	4.55487e-09	5.86738e-08	Slc25a38
ENSMUSG00000020868	737.837	-0.667112	0.113815	-5.86139	4.59002e-09	5.90956e-08	Xylt2
ENSMUSG00000022096	47.623	-2.26389	0.386799	-5.85289	4.83112e-09	6.20697e-08	Hr
ENSMUSG00000021279	307.102	-1.44742	0.247317	-5.85248	4.84287e-09	6.21881e-08	Cdc42bpb
ENSMUSG00000038582	1355.49	-1.09796	0.187678	-5.85024	4.90875e-09	6.30012e-08	Pptc7
ENSMUSG00000098291	3.7129	-3.46627	0.592781	-5.84747	4.99109e-09	6.39578e-08	Mir6973a
ENSMUSG00000041354	2016.89	-0.727384	0.124438	-5.84534	5.05544e-09	6.4715e-08	Rgl2
ENSMUSG00000041984	15.7434	-4.04159	0.691508	-5.84461	5.07764e-09	6.49652e-08	Rptn
ENSMUSG00000053930	37.7986	-5.01617	0.858622	-5.84212	5.15404e-09	6.58741e-08	Shisa6
ENSMUSG00000004612	38.977	-2.84998	0.487854	-5.84188	5.1615e-09	6.59352e-08	Nkg7
ENSMUSG00000040270	217.013	-2.46214	0.42163	-5.83956	5.23374e-09	6.67886e-08	Bach2
ENSMUSG00000046500	2.81968	-4.71964	0.808404	-5.83822	5.27616e-09	6.72601e-08	Fam19a4
ENSMUSG00000021743	65.892	-5.06816	0.868364	-5.83644	5.33278e-09	6.79466e-08	Fezf2
ENSMUSG00000031667	368.958	-0.833756	0.142888	-5.83502	5.37836e-09	6.84919e-08	Aktip
ENSMUSG00000025038	3.35978	-3.65798	0.626926	-5.83478	5.38605e-09	6.85542e-08	Efhc2
ENSMUSG00000018387	5.90093	-2.77438	0.475503	-5.83463	5.39105e-09	6.85824e-08	Shroom1
ENSMUSG00000043467	496.347	-1.25151	0.214511	-5.83427	5.40271e-09	6.86952e-08	Zbtb37
ENSMUSG00000055963	15.9741	-2.45874	0.421547	-5.83267	5.4546e-09	6.93192e-08	Triqk
ENSMUSG00000026866	26.9429	-2.67846	0.459396	-5.8304	5.52954e-09	7.01989e-08	Kynu
ENSMUSG00000038267	127.306	-2.66452	0.457093	-5.82926	5.56736e-09	7.06426e-08	Slc22a23
ENSMUSG00000073987	163.909	-1.86651	0.321043	-5.8139	6.1034e-09	7.69278e-08	Ggh
ENSMUSG00000091996	38.7988	-2.38804	0.410772	-5.81355	6.11604e-09	7.70082e-08	BC049352
ENSMUSG00000067297	4.77194	-2.34244	0.402925	-5.81358	6.11504e-09	7.70082e-08	Ifit1bl2
ENSMUSG00000076886	2.24651	-3.65673	0.629231	-5.81142	6.19438e-09	7.79547e-08	Traj44
ENSMUSG00000113328	22.4711	-1.13328	0.195041	-5.81046	6.23028e-09	7.83263e-08	AC154347,1
ENSMUSG00000076800	2.5333	-3.85583	0.663833	-5.80843	6.3063e-09	7.92009e-08	Trav6n-5
ENSMUSG00000076880	1.72812	-4.21931	0.726628	-5.8067	6.37178e-09	7.99824e-08	Traj51
ENSMUSG00000054662	5.26406	-3.2799	0.564913	-5.80602	6.39749e-09	8.02641e-08	Ano9
ENSMUSG00000087466	2.35559	-3.74118	0.644769	-5.80236	6.53893e-09	8.18716e-08	A330041J22Rik
ENSMUSG00000033389	72.6765	-2.79149	0.481167	-5.8015	6.57251e-09	8.225e-08	Arhgap44
ENSMUSG00000052917	895.87	-1.44732	0.249521	-5.80039	6.61624e-09	8.2629e-08	Senp7
ENSMUSG00000036985	404.322	-0.788903	0.136007	-5.80045	6.61357e-09	8.2629e-08	Zdhhc9
ENSMUSG00000059824	497.04	-1.73508	0.299208	-5.7989	6.67503e-09	8.33209e-08	Dbp
ENSMUSG00000025139	1941.66	-0.479038	0.0826244	-5.79777	6.72011e-09	8.37986e-08	Tollip
ENSMUSG00000043279	1966.47	-1.1614	0.200322	-5.79766	6.72476e-09	8.3814e-08	Trim56
ENSMUSG00000035948	74.4515	-4.51941	0.779641	-5.79679	6.75957e-09	8.41625e-08	Acss3
ENSMUSG00000076895	3.68071	-3.56525	0.615234	-5.79495	6.83427e-09	8.49204e-08	Traj34
ENSMUSG00000020894	1287.24	-0.573394	0.0989491	-5.79484	6.83883e-09	8.49342e-08	Vamp2
ENSMUSG00000016386	5.06877	-3.39346	0.585789	-5.79297	6.91538e-09	8.57548e-08	Mpped2
ENSMUSG00000021846	217.458	-2.43302	0.42033	-5.78835	7.10796e-09	8.80098e-08	Peli2
ENSMUSG00000076463	396.848	-4.62704	0.799492	-5.78747	7.1454e-09	8.83399e-08	Trbv3
ENSMUSG00000043122	182.466	-5.10796	0.882668	-5.78696	7.16711e-09	8.85638e-08	A530016L24Rik
ENSMUSG00000020419	6.70139	-3.13206	0.541456	-5.78451	7.27253e-09	8.97761e-08	Hormad2
ENSMUSG00000070738	6086.59	-1.35735	0.234864	-5.7793	7.50104e-09	9.2365e-08	Dgkd
ENSMUSG00000021772	193.141	-1.00207	0.17348	-5.77627	7.63734e-09	9.39022e-08	Nkiras1
ENSMUSG00000038175	853.224	-1.40568	0.243375	-5.77575	7.661e-09	9.4146e-08	Mylip
ENSMUSG00000108484	16.2532	-1.49652	0.259112	-5.77556	7.66975e-09	9.42065e-08	Gm18537
ENSMUSG00000030088	306.861	-2.37162	0.411074	-5.76932	7.95908e-09	9.75166e-08	Aldh1l1
ENSMUSG00000028076	971.227	-1.15543	0.200523	-5.7621	8.30745e-09	1.01633e-07	Cd1d1
ENSMUSG00000067203	156.048	-1.53004	0.265694	-5.75866	8.47825e-09	1.03619e-07	H2-K2
ENSMUSG00000033450	239.681	-0.68147	0.118352	-5.75798	8.51257e-09	1.03987e-07	Tagap
ENSMUSG00000036510	3.214	-3.58051	0.621902	-5.75735	8.54435e-09	1.04272e-07	Cdh8
ENSMUSG00000032594	2235.48	-0.61423	0.106742	-5.75432	8.69933e-09	1.0611e-07	Ip6k1
ENSMUSG00000035776	594.548	-0.946638	0.164556	-5.75269	8.78342e-09	1.0703e-07	Cd99l2
ENSMUSG00000031995	81.597	-2.67462	0.465173	-5.74972	8.93903e-09	1.0871e-07	St14
ENSMUSG00000015478	782.079	-0.683513	0.118899	-5.74869	8.99353e-09	1.09265e-07	Rnf5
ENSMUSG00000106289	2.0139	-3.96366	0.689969	-5.74469	9.20899e-09	1.11717e-07	Trav23
ENSMUSG00000036928	76.1899	-3.68623	0.641832	-5.7433	9.28468e-09	1.12469e-07	Stag3
ENSMUSG00000025150	858.625	-2.63284	0.459028	-5.73569	9.7115e-09	1.17523e-07	Cbr2
ENSMUSG00000057367	1419.22	-0.705086	0.122953	-5.73461	9.77373e-09	1.18218e-07	Birc2
ENSMUSG00000095041	4180.54	-1.11666	0.194799	-5.73236	9.90419e-09	1.1956e-07	AC149090,1
ENSMUSG00000026277	1696.23	-0.614677	0.107399	-5.7233	1.04474e-08	1.25748e-07	Stk25
ENSMUSG00000104069	2.15192	-3.84555	0.673047	-5.71365	1.1058e-08	1.32772e-07	Gm37198
ENSMUSG00000103983	56.0706	-1.31614	0.230524	-5.70934	1.13415e-08	1.35976e-07	Gm20045
ENSMUSG00000038612	5806.64	-0.489364	0.0857193	-5.70892	1.13695e-08	1.36246e-07	Mcl1
ENSMUSG00000070880	2.64626	-3.69252	0.646866	-5.70832	1.14097e-08	1.36661e-07	Gad1
ENSMUSG00000072770	133.048	-1.26077	0.220885	-5.70782	1.14432e-08	1.36995e-07	Acrbp
ENSMUSG00000032120	711.049	-0.933717	0.163611	-5.70694	1.15027e-08	1.3763e-07	C2cd2l
ENSMUSG00000020198	2351.66	-0.485027	0.08499	-5.70687	1.15074e-08	1.3763e-07	Ap3d1
ENSMUSG00000020627	56.6058	-2.43583	0.426972	-5.70488	1.16427e-08	1.39112e-07	Klhl29
ENSMUSG00000042212	2.9254	-5.00083	0.877194	-5.70095	1.19145e-08	1.42291e-07	Sprr2d
ENSMUSG00000037022	126.499	-1.36056	0.238712	-5.69961	1.20081e-08	1.43339e-07	Mmaa
ENSMUSG00000026573	18.0237	-3.83218	0.672704	-5.69667	1.22167e-08	1.45758e-07	Xcl1
ENSMUSG00000034918	2.28658	-3.94858	0.693161	-5.69648	1.22305e-08	1.45852e-07	Cdhr2
ENSMUSG00000060615	2.36348	-4.22571	0.741854	-5.69615	1.22546e-08	1.46069e-07	Ang4
ENSMUSG00000076470	246.088	-4.79911	0.842702	-5.6949	1.23444e-08	1.47067e-07	Trbv13-3
ENSMUSG00000004947	590.296	-0.641106	0.112647	-5.69126	1.26102e-08	1.49871e-07	Dtx2
ENSMUSG00000060012	955.604	-0.7677	0.134894	-5.69113	1.26204e-08	1.49919e-07	Kif13b
ENSMUSG00000032883	610.97	-1.01196	0.177821	-5.69087	1.2639e-08	1.50069e-07	Acsl3
ENSMUSG00000045545	221.548	-3.37226	0.592582	-5.69078	1.26459e-08	1.50078e-07	Krt14
ENSMUSG00000029068	4559.76	-0.631521	0.111011	-5.68882	1.27922e-08	1.51668e-07	Ccnl2
ENSMUSG00000111620	1.8528	-3.8787	0.681836	-5.68861	1.28081e-08	1.51709e-07	AC118733,2
ENSMUSG00000026754	546.612	-0.589982	0.103721	-5.68818	1.28399e-08	1.5194e-07	Golga1
ENSMUSG00000021239	2.52861	-4.78839	0.842023	-5.68677	1.29467e-08	1.5313e-07	Vsx2
ENSMUSG00000015224	16.1593	-2.58386	0.454567	-5.68422	1.31409e-08	1.55128e-07	Cyp2j9
ENSMUSG00000038776	398.172	-1.74036	0.306267	-5.68251	1.32732e-08	1.56539e-07	Ephx1
ENSMUSG00000033767	2735.07	-0.709118	0.124806	-5.68178	1.33302e-08	1.57033e-07	Tmem131l
ENSMUSG00000042476	51.2519	-1.86054	0.327529	-5.68055	1.34264e-08	1.58044e-07	Abcb4
ENSMUSG00000084957	522.539	-0.54448	0.0958682	-5.67946	1.35118e-08	1.58821e-07	Bbip1
ENSMUSG00000026571	562.37	-1.05921	0.186536	-5.67833	1.36014e-08	1.59797e-07	Dcaf6
ENSMUSG00000074629	10.086	-1.53296	0.269978	-5.67809	1.3621e-08	1.59951e-07	4930518I15Rik
ENSMUSG00000014592	344.656	-0.643894	0.113408	-5.67765	1.36557e-08	1.60282e-07	Camta1
ENSMUSG00000046169	194.684	-2.95355	0.520412	-5.6754	1.38364e-08	1.62247e-07	Adamts6
ENSMUSG00000106093	4.17488	-3.31902	0.584924	-5.67428	1.39277e-08	1.6324e-07	Gm42722
ENSMUSG00000021565	87.5012	-2.39394	0.421925	-5.67385	1.39621e-08	1.63565e-07	Slc6a19
ENSMUSG00000025467	2.86051	-4.07046	0.717977	-5.66935	1.43338e-08	1.6776e-07	Prap1
ENSMUSG00000037034	654.11	-5.058	0.892199	-5.66914	1.43514e-08	1.67886e-07	Pax1
ENSMUSG00000018925	4.6622	-3.40169	0.600076	-5.66877	1.43827e-08	1.68172e-07	Heatr9
ENSMUSG00000022687	153.107	-2.38818	0.422014	-5.659	1.52254e-08	1.77434e-07	Boc
ENSMUSG00000054146	6.44628	-3.23702	0.572189	-5.65726	1.53808e-08	1.78991e-07	Krt15
ENSMUSG00000030827	5.68711	-2.67635	0.473453	-5.65283	1.57823e-08	1.83577e-07	Fgf21
ENSMUSG00000070306	359.188	-2.82622	0.500112	-5.65117	1.5936e-08	1.85189e-07	Ccdc153
ENSMUSG00000105708	39.0027	-2.88724	0.511293	-5.64694	1.63331e-08	1.89446e-07	Gm36070
ENSMUSG00000086785	4.22694	-2.47889	0.439096	-5.64545	1.64754e-08	1.90916e-07	Gm6081
ENSMUSG00000033885	531.898	-0.679227	0.120336	-5.64441	1.65747e-08	1.91975e-07	Pxk
ENSMUSG00000024603	1094.27	-0.501723	0.0889066	-5.64326	1.66857e-08	1.9308e-07	Dctn4
ENSMUSG00000028020	29.9705	-3.59708	0.637848	-5.6394	1.70644e-08	1.97183e-07	Glrb
ENSMUSG00000033308	37.0808	-2.74001	0.485896	-5.63909	1.7095e-08	1.97444e-07	Dpyd
ENSMUSG00000097779	11.6135	-1.60647	0.284893	-5.63886	1.71184e-08	1.97622e-07	4833407H14Rik
ENSMUSG00000047067	288.524	-0.687122	0.121865	-5.63837	1.71664e-08	1.9799e-07	Dusp28
ENSMUSG00000076483	40.5311	-4.91084	0.871474	-5.6351	1.74953e-08	2.015e-07	Trbj1-1
ENSMUSG00000038497	285.831	-0.753074	0.133654	-5.63449	1.75573e-08	2.02024e-07	Tmco3
ENSMUSG00000044172	2.14006	-4.32278	0.767268	-5.63399	1.76087e-08	2.02426e-07	Ptx4
ENSMUSG00000079103	6.67991	-4.39191	0.779834	-5.63185	1.78286e-08	2.04858e-07	Tgm7
ENSMUSG00000114504	1.70741	-4.45954	0.791936	-5.63118	1.78976e-08	2.05459e-07	AC154681,1
ENSMUSG00000045409	942.253	-0.719809	0.127875	-5.629	1.81253e-08	2.07975e-07	Trim39
ENSMUSG00000076467	552.981	-5.159	0.916775	-5.62734	1.83012e-08	2.09896e-07	Trbv13-1
ENSMUSG00000063779	8.98687	-4.09061	0.727368	-5.62386	1.86738e-08	2.1387e-07	Chil4
ENSMUSG00000040966	4.0925	-3.90817	0.694966	-5.62355	1.87074e-08	2.14155e-07	Slc22a2
ENSMUSG00000022656	41.1838	-1.6437	0.292397	-5.62146	1.89349e-08	2.16658e-07	Nectin3
ENSMUSG00000026483	246.014	-1.77183	0.315252	-5.62034	1.90578e-08	2.17963e-07	Fam129a
ENSMUSG00000087633	13.9301	-2.16876	0.386026	-5.61816	1.92999e-08	2.20322e-07	Gm14455
ENSMUSG00000039452	42.9675	-1.65592	0.2948	-5.6171	1.94187e-08	2.21576e-07	Snx22
ENSMUSG00000084808	48.0202	-0.849376	0.151235	-5.61627	1.9512e-08	2.22537e-07	9430091E24Rik
ENSMUSG00000027737	644.239	-2.25321	0.401331	-5.61434	1.97316e-08	2.24728e-07	Slc7a11
ENSMUSG00000036687	13.2484	-2.10842	0.375599	-5.61349	1.98283e-08	2.2562e-07	Tmem184a
ENSMUSG00000090877	47.8409	-2.41728	0.430937	-5.60936	2.03077e-08	2.30861e-07	Hspa1b
ENSMUSG00000026471	1230.84	-1.61528	0.288028	-5.60807	2.04593e-08	2.32268e-07	Mr1
ENSMUSG00000034342	6906.4	-1.33737	0.238585	-5.60545	2.0772e-08	2.35486e-07	Cbl
ENSMUSG00000020273	552.686	-1.0966	0.195654	-5.60481	2.0848e-08	2.36239e-07	Papolg
ENSMUSG00000055561	20.2061	-4.35509	0.777697	-5.59998	2.14378e-08	2.42364e-07	Spink5
ENSMUSG00000030327	423.612	-0.583019	0.104115	-5.59976	2.14653e-08	2.42563e-07	Necap1
ENSMUSG00000076900	2.33033	-3.9566	0.706914	-5.59701	2.18085e-08	2.45988e-07	Traj29
ENSMUSG00000076617	7919.28	-1.7558	0.313698	-5.59712	2.17943e-08	2.45988e-07	Ighm
ENSMUSG00000097823	4.76644	-2.12229	0.379259	-5.59588	2.19509e-08	2.47481e-07	Gm16701
ENSMUSG00000004451	798.382	-0.6915	0.123575	-5.59579	2.19622e-08	2.47495e-07	Ralb
ENSMUSG00000090150	402.878	-1.77519	0.317277	-5.5951	2.20498e-08	2.48368e-07	Acad11
ENSMUSG00000108617	8.80043	-2.11076	0.377445	-5.59221	2.24192e-08	2.52182e-07	Gm31749
ENSMUSG00000041696	93.864	-3.65434	0.653838	-5.58906	2.28306e-08	2.56223e-07	Rasl12
ENSMUSG00000026748	605.849	-1.83432	0.328731	-5.57999	2.40535e-08	2.69703e-07	Plxdc2
ENSMUSG00000003123	1534.48	-3.30448	0.592432	-5.57782	2.43551e-08	2.72586e-07	Lipe
ENSMUSG00000025321	17.1309	-2.16723	0.388699	-5.57561	2.46664e-08	2.75819e-07	Itgb8
ENSMUSG00000022758	25.465	-2.86446	0.513998	-5.57289	2.50544e-08	2.79649e-07	P2rx6
ENSMUSG00000078954	57.4073	-3.13841	0.563349	-5.57098	2.53312e-08	2.82482e-07	Arhgap8
ENSMUSG00000055333	57.6071	-4.21127	0.756178	-5.56915	2.55979e-08	2.85198e-07	Fat2
ENSMUSG00000064247	14.6515	-1.97216	0.354257	-5.56704	2.59098e-08	2.88541e-07	Plcxd1
ENSMUSG00000012187	19.3969	-5.25186	0.943672	-5.56534	2.6164e-08	2.9124e-07	Mogat1
ENSMUSG00000034853	174.872	-3.28778	0.590834	-5.56464	2.62698e-08	2.92286e-07	Acot11
ENSMUSG00000020086	33.0455	-2.28592	0.410909	-5.56308	2.65051e-08	2.94637e-07	H2afy2
ENSMUSG00000024158	492.532	-1.02919	0.185015	-5.56272	2.65603e-08	2.95117e-07	Hagh
ENSMUSG00000069378	4.30723	-2.75703	0.495661	-5.56234	2.66186e-08	2.95632e-07	Prdm6
ENSMUSG00000022562	287.424	-2.22908	0.401134	-5.55693	2.74564e-08	3.04661e-07	Oplah
ENSMUSG00000036699	39.5698	-4.62804	0.832943	-5.55625	2.7563e-08	3.05567e-07	Zcchc12
ENSMUSG00000033059	1101.06	-1.03889	0.186987	-5.55593	2.76133e-08	3.05987e-07	Pygb
ENSMUSG00000031666	1701.73	-1.01043	0.181954	-5.55319	2.80495e-08	3.10401e-07	Rbl2
ENSMUSG00000076867	1.8787	-3.61067	0.650236	-5.55287	2.81016e-08	3.10697e-07	Trdv4
ENSMUSG00000054459	6.57625	-2.63657	0.474963	-5.55111	2.83856e-08	3.13696e-07	Vsnl1
ENSMUSG00000097324	3.45189	-2.71482	0.489264	-5.54879	2.87652e-08	3.17749e-07	Carmn
ENSMUSG00000029366	3216.54	-1.61005	0.290186	-5.54833	2.88411e-08	3.18444e-07	Dck
ENSMUSG00000033068	340.495	-0.573997	0.103458	-5.54814	2.88725e-08	3.18648e-07	Entpd6
ENSMUSG00000059921	26.2483	-2.97625	0.536602	-5.54648	2.91477e-08	3.21249e-07	Unc5c
ENSMUSG00000031902	7064.38	-1.1842	0.213505	-5.54647	2.91492e-08	3.21249e-07	Nfatc3
ENSMUSG00000029127	193.728	-0.572209	0.103168	-5.5464	2.91605e-08	3.21249e-07	Zbtb49
ENSMUSG00000030161	583.494	-1.80293	0.325189	-5.54426	2.95207e-08	3.25071e-07	Gabarapl1
ENSMUSG00000037922	72.8377	-2.73554	0.493432	-5.5439	2.95804e-08	3.25583e-07	Bank1
ENSMUSG00000097088	3.20312	-2.757	0.497363	-5.54324	2.96919e-08	3.26518e-07	Gm26615
ENSMUSG00000052396	18.4618	-4.69406	0.846894	-5.54268	2.97877e-08	3.27424e-07	Mogat2
ENSMUSG00000028801	4.5213	-3.57414	0.645182	-5.53974	3.02917e-08	3.32519e-07	Stpg1
ENSMUSG00000027276	121.465	-1.96463	0.354722	-5.5385	3.05067e-08	3.3458e-07	Jag1
ENSMUSG00000022744	470.413	-0.82358	0.148743	-5.53693	3.07825e-08	3.37304e-07	Cldnd1
ENSMUSG00000024160	817.294	-0.664875	0.12013	-5.53465	3.11859e-08	3.4142e-07	Spsb3
ENSMUSG00000098108	28.8691	-1.9584	0.353862	-5.53436	3.12373e-08	3.4183e-07	Gm27008
ENSMUSG00000038784	571.306	-0.540825	0.0977693	-5.53164	3.17247e-08	3.46854e-07	Cnot4
ENSMUSG00000111467	1.43793	-4.21706	0.762603	-5.52982	3.20555e-08	3.5008e-07	AC159890,1
ENSMUSG00000020246	675.745	-0.630272	0.114031	-5.52718	3.25422e-08	3.55161e-07	Hcfc2
ENSMUSG00000079505	78.2283	-0.918452	0.166182	-5.52679	3.26148e-08	3.55795e-07	Gm11131
ENSMUSG00000039579	3.72498	-3.43769	0.622088	-5.52605	3.27523e-08	3.57137e-07	Grin3a
ENSMUSG00000019295	529.861	-0.787646	0.142587	-5.52398	3.31404e-08	3.61208e-07	Tmem129
ENSMUSG00000046679	311.552	-0.582698	0.105525	-5.52192	3.35314e-08	3.65146e-07	C87436
ENSMUSG00000096096	17.2523	-2.16756	0.392577	-5.52137	3.36363e-08	3.65857e-07	Trav4-4-dv10
ENSMUSG00000052748	393.208	-0.872901	0.158093	-5.52143	3.36258e-08	3.65857e-07	Swt1
ENSMUSG00000109336	849.483	-0.469533	0.0850396	-5.52135	3.36413e-08	3.65857e-07	Samd4b
ENSMUSG00000032462	163.403	-1.77588	0.321743	-5.51956	3.39851e-08	3.69269e-07	Pik3cb
ENSMUSG00000063077	1372.91	-1.49046	0.270204	-5.51608	3.46649e-08	3.76322e-07	Kif1b
ENSMUSG00000031757	1.6928	-4.20315	0.762002	-5.51594	3.46928e-08	3.76458e-07	Mt4
ENSMUSG00000023960	258.343	-2.2046	0.399739	-5.5151	3.48574e-08	3.77912e-07	Enpp5
ENSMUSG00000024511	15.6919	-2.12492	0.385693	-5.50934	3.60172e-08	3.88942e-07	Rab27b
ENSMUSG00000006307	3083.12	-0.622601	0.113046	-5.50752	3.63923e-08	3.92819e-07	Kmt2b
ENSMUSG00000067370	84.3191	-1.47725	0.268284	-5.50628	3.66488e-08	3.95414e-07	B3galt4
ENSMUSG00000034324	5.65224	-4.20585	0.763871	-5.50596	3.67155e-08	3.9596e-07	Tmem132c
ENSMUSG00000085081	36.7747	-2.77364	0.503804	-5.50538	3.68365e-08	3.97091e-07	Rptoros
ENSMUSG00000034640	373.619	-2.08687	0.379111	-5.50464	3.69929e-08	3.98602e-07	Tiparp
ENSMUSG00000027605	813.956	-2.92732	0.531833	-5.50421	3.70833e-08	3.99401e-07	Acss2
ENSMUSG00000039873	38.8726	-1.39255	0.253053	-5.503	3.73373e-08	4.01961e-07	Neurl2
ENSMUSG00000040264	317.933	-1.87309	0.340384	-5.50288	3.73647e-08	4.02079e-07	Gbp2b
ENSMUSG00000033538	35.9888	-1.71003	0.31083	-5.50148	3.76614e-08	4.04918e-07	Casp4
ENSMUSG00000036206	133.881	-1.64509	0.299042	-5.50119	3.77236e-08	4.05409e-07	Sh3bp4
ENSMUSG00000033083	312.285	-2.08372	0.37879	-5.50099	3.77663e-08	4.0569e-07	Tbc1d4
ENSMUSG00000020598	24.5888	-1.91793	0.348913	-5.49686	3.86621e-08	4.14379e-07	Nrcam
ENSMUSG00000009291	1611.16	-0.797887	0.145155	-5.49679	3.86763e-08	4.14379e-07	Pttg1ip
ENSMUSG00000091002	4.26323	-3.85019	0.700487	-5.49645	3.87505e-08	4.14813e-07	Tcerg1l
ENSMUSG00000051431	15.8097	-3.59718	0.654548	-5.49567	3.89222e-08	4.16469e-07	Gpr87
ENSMUSG00000106087	4.62226	-2.09472	0.381212	-5.4949	3.9093e-08	4.17933e-07	Gm43609
ENSMUSG00000024331	113.117	-3.09264	0.562856	-5.49455	3.91717e-08	4.18592e-07	Dsc2
ENSMUSG00000091383	37.0949	-1.41784	0.258072	-5.49396	3.93021e-08	4.19803e-07	Hist1h2al
ENSMUSG00000028100	37.5942	-2.3792	0.433249	-5.49153	3.98464e-08	4.25247e-07	Nudt17
ENSMUSG00000049103	128.282	-1.42572	0.259685	-5.49021	4.01462e-08	4.28075e-07	Ccr2
ENSMUSG00000034438	1593.67	-1.90897	0.347719	-5.48999	4.01951e-08	4.28411e-07	Gbp8
ENSMUSG00000073437	232.48	-0.976407	0.177888	-5.48887	4.04511e-08	4.30952e-07	D330041H03Rik
ENSMUSG00000022144	3.04547	-3.13352	0.57092	-5.48855	4.05241e-08	4.31543e-07	Gdnf
ENSMUSG00000072847	75.2946	-0.735133	0.133944	-5.48834	4.0572e-08	4.31866e-07	A530017D24Rik
ENSMUSG00000076864	22.439	-4.94869	0.901816	-5.48747	4.07723e-08	4.33811e-07	Trdv1
ENSMUSG00000025316	700.783	-0.888947	0.162062	-5.48522	4.12954e-08	4.38617e-07	Banp
ENSMUSG00000046516	145.444	-0.780576	0.142329	-5.48431	4.15097e-08	4.40512e-07	Cox17
ENSMUSG00000109780	3.8484	-2.93244	0.534848	-5.48275	4.18764e-08	4.43942e-07	Gm45447
ENSMUSG00000031070	32.8416	-1.67883	0.306243	-5.48202	4.205e-08	4.45284e-07	Mrgprf
ENSMUSG00000030533	1281.65	-0.630344	0.115002	-5.48114	4.22582e-08	4.47297e-07	Unc45a
ENSMUSG00000074657	21.7102	-1.58179	0.288665	-5.47967	4.26111e-08	4.5045e-07	Kif5a
ENSMUSG00000055322	1496.28	-1.67106	0.305009	-5.47873	4.28386e-08	4.5266e-07	Tns1
ENSMUSG00000036810	533.5	-0.564171	0.103041	-5.47521	4.36986e-08	4.61153e-07	Cnep1r1
ENSMUSG00000028217	12.873	-2.18705	0.399452	-5.47513	4.37192e-08	4.61172e-07	Cdh17
ENSMUSG00000022303	4.57848	-2.83684	0.518207	-5.47434	4.39134e-08	4.63022e-07	Dcstamp
ENSMUSG00000105652	4.83192	-3.89755	0.712116	-5.47319	4.4201e-08	4.65854e-07	4930519L02Rik
ENSMUSG00000074093	23.9655	-2.43641	0.445411	-5.47003	4.49967e-08	4.73689e-07	Svip
ENSMUSG00000022770	1500.69	-0.772565	0.141237	-5.47001	4.50022e-08	4.73689e-07	Dlg1
ENSMUSG00000038143	50.3131	-1.99805	0.365385	-5.46835	4.54244e-08	4.77724e-07	Stox2
ENSMUSG00000086533	37.6235	-1.50269	0.274889	-5.46652	4.58958e-08	4.82269e-07	Mypopos
ENSMUSG00000102327	2.3648	-3.53595	0.646986	-5.46527	4.62209e-08	4.85477e-07	Trbv12-3
ENSMUSG00000030410	337.436	-1.0534	0.192752	-5.46507	4.62728e-08	4.85815e-07	Dmwd
ENSMUSG00000038224	7.87492	-2.16388	0.396052	-5.46362	4.66511e-08	4.89159e-07	Serpinf2
ENSMUSG00000035696	1869.87	-0.926227	0.169604	-5.46111	4.7316e-08	4.94865e-07	Rnf38
ENSMUSG00000011884	1572.99	-0.522921	0.0957896	-5.45906	4.78675e-08	5.00207e-07	Gltp
ENSMUSG00000029554	1547.37	-1.07523	0.196978	-5.45864	4.79793e-08	5.0095e-07	Mad1l1
ENSMUSG00000028518	84.5222	-2.97471	0.544992	-5.45826	4.8081e-08	5.01798e-07	Prkaa2
ENSMUSG00000097353	46.0212	-1.00113	0.183422	-5.45804	4.81431e-08	5.02233e-07	A430046D13Rik
ENSMUSG00000019876	32.3906	-1.44227	0.264309	-5.45676	4.84913e-08	5.05651e-07	Pkib
ENSMUSG00000002409	676.568	-1.18011	0.216286	-5.45624	4.8631e-08	5.06893e-07	Dyrk1b
ENSMUSG00000047996	89.8034	-1.12561	0.206307	-5.45603	4.86893e-08	5.07285e-07	Prrg1
ENSMUSG00000050463	4.3711	-3.93345	0.720959	-5.45586	4.87369e-08	5.07565e-07	Krt78
ENSMUSG00000059479	78.2026	-1.82233	0.334165	-5.45338	4.94203e-08	5.14247e-07	B3gnt8
ENSMUSG00000083618	2.0569	-3.52827	0.647109	-5.45236	4.97064e-08	5.16787e-07	Gm11771
ENSMUSG00000076870	3.48995	-3.32356	0.609862	-5.4497	5.04562e-08	5.23917e-07	Trdj1
ENSMUSG00000020134	1100.97	-1.00533	0.184601	-5.44597	5.15225e-08	5.33862e-07	Peli1
ENSMUSG00000076821	11.9857	-3.91739	0.719511	-5.44452	5.19467e-08	5.3803e-07	Trav8n-2
ENSMUSG00000031494	3.05946	-4.13835	0.760325	-5.44287	5.24297e-08	5.42347e-07	Cd209a
ENSMUSG00000046480	1057.01	-3.47557	0.638656	-5.44201	5.26838e-08	5.44289e-07	Scn4b
ENSMUSG00000086390	25.2836	-3.36086	0.617749	-5.44049	5.31355e-08	5.48494e-07	1810019D21Rik
ENSMUSG00000096825	18.7959	-4.1907	0.770615	-5.43813	5.38432e-08	5.54604e-07	Trav12-1
ENSMUSG00000000711	1311.57	-1.06679	0.196172	-5.43806	5.38627e-08	5.54604e-07	Rab5b
ENSMUSG00000022025	8.97737	-3.55969	0.654978	-5.43482	5.48514e-08	5.63839e-07	Cnmd
ENSMUSG00000036856	164.701	-2.57041	0.473296	-5.43086	5.60828e-08	5.75774e-07	Wnt4
ENSMUSG00000020782	358.145	-0.77003	0.141866	-5.42788	5.70282e-08	5.84991e-07	Llgl2
ENSMUSG00000028150	4022.31	-2.9491	0.543439	-5.42674	5.7392e-08	5.88477e-07	Rorc
ENSMUSG00000061527	1032.9	-4.19402	0.773019	-5.4255	5.77926e-08	5.92091e-07	Krt5
ENSMUSG00000043415	185.942	-2.47088	0.455586	-5.42352	5.84357e-08	5.98181e-07	Otud1
ENSMUSG00000060716	10.3771	-2.9453	0.543658	-5.41757	6.04147e-08	6.16385e-07	Plekhh1
ENSMUSG00000068205	57.4027	-2.69167	0.496964	-5.41622	6.08716e-08	6.2079e-07	Macrod2
ENSMUSG00000031373	157.599	-3.94997	0.729625	-5.4137	6.17369e-08	6.29091e-07	Car5b
ENSMUSG00000022664	279.793	-0.891566	0.16477	-5.41098	6.26812e-08	6.3845e-07	Slc35a5
ENSMUSG00000037405	725.127	-1.18542	0.219083	-5.41083	6.27346e-08	6.38728e-07	Icam1
ENSMUSG00000087666	8.19621	-3.16928	0.586551	-5.40325	6.54446e-08	6.63298e-07	B230359F08Rik
ENSMUSG00000032083	8.66394	-3.16179	0.585248	-5.40248	6.57274e-08	6.65341e-07	Apoa1
ENSMUSG00000058656	2.50556	-3.81002	0.70526	-5.40229	6.57953e-08	6.65754e-07	Samd12
ENSMUSG00000090173	228.487	-2.2651	0.419294	-5.40218	6.58371e-08	6.65903e-07	Fbxw10
ENSMUSG00000025287	593.614	-0.399963	0.0740399	-5.40199	6.59051e-08	6.66316e-07	Acot9
ENSMUSG00000041923	4.15489	-3.99232	0.739143	-5.40127	6.6169e-08	6.68709e-07	Nol4
ENSMUSG00000060675	685.694	-2.58995	0.479885	-5.39703	6.77545e-08	6.83328e-07	Pla2g16
ENSMUSG00000027347	4696.72	-2.1355	0.395698	-5.39679	6.78444e-08	6.83954e-07	Rasgrp1
ENSMUSG00000046027	318.861	-0.862591	0.159874	-5.39545	6.83529e-08	6.88234e-07	Stard5
ENSMUSG00000032915	22.4728	-2.74585	0.509356	-5.39083	7.01346e-08	7.05306e-07	Adgre4
ENSMUSG00000058793	2565.74	-0.758551	0.140769	-5.38863	7.09949e-08	7.13665e-07	Cds2
ENSMUSG00000043384	739.061	-1.14773	0.213098	-5.38593	7.20696e-08	7.23581e-07	Gprasp1
ENSMUSG00000000983	92.9953	-3.76783	0.699618	-5.38555	7.22218e-08	7.24813e-07	Wfdc18
ENSMUSG00000026166	8.25745	-3.42044	0.63535	-5.38354	7.3033e-08	7.32655e-07	Ccl20
ENSMUSG00000021171	1571.57	-1.31121	0.243589	-5.38288	7.3303e-08	7.3487e-07	Esyt2
ENSMUSG00000041959	1202.44	-2.29243	0.425934	-5.38213	7.36116e-08	7.36941e-07	S100a10
ENSMUSG00000050730	55.7163	-1.88222	0.349715	-5.38215	7.36e-08	7.36941e-07	Arhgap42
ENSMUSG00000026235	15.8322	-1.68605	0.313272	-5.38206	7.36401e-08	7.36941e-07	Epha4
ENSMUSG00000037940	488.631	-2.99595	0.556796	-5.3807	7.41986e-08	7.42227e-07	Inpp4b
ENSMUSG00000076473	482.428	-4.04839	0.75259	-5.37927	7.47864e-08	7.47804e-07	Trbv16
ENSMUSG00000108732	79.3966	-1.70686	0.317397	-5.37768	7.54513e-08	7.54145e-07	2310043P16Rik
ENSMUSG00000076877	1.29568	-3.79872	0.706504	-5.37679	7.58263e-08	7.57277e-07	Traj56
ENSMUSG00000022229	2.48765	-3.83714	0.713773	-5.37585	7.62212e-08	7.60911e-07	Atp12a
ENSMUSG00000089875	13.5339	-2.10411	0.391442	-5.37528	7.64633e-08	7.624e-07	Etohd2
ENSMUSG00000028082	114.082	-1.83242	0.340983	-5.37393	7.70374e-08	7.67501e-07	Sh3d19
ENSMUSG00000024998	68.3701	-1.97997	0.36846	-5.37362	7.7171e-08	7.6852e-07	Plce1
ENSMUSG00000074415	56.2881	-2.13693	0.397954	-5.36981	7.88207e-08	7.83362e-07	2610203C20Rik
ENSMUSG00000000184	770.599	-2.58319	0.481074	-5.36963	7.88983e-08	7.83817e-07	Ccnd2
ENSMUSG00000022914	1610.13	-0.866395	0.161353	-5.36956	7.89304e-08	7.83819e-07	Brwd1
ENSMUSG00000027634	2140.62	-0.911272	0.169821	-5.36609	8.04614e-08	7.98055e-07	Ndrg3
ENSMUSG00000025931	115.602	-2.48706	0.463508	-5.36574	8.06196e-08	7.98657e-07	Paqr8
ENSMUSG00000055972	3.9737	-2.74888	0.512398	-5.36475	8.10629e-08	8.02726e-07	2810407A14Rik
ENSMUSG00000021234	33.7978	-1.31582	0.24529	-5.36433	8.12522e-08	8.04276e-07	Fam161b
ENSMUSG00000089774	156.396	-1.79451	0.334571	-5.36362	8.15694e-08	8.07091e-07	Slc5a3
ENSMUSG00000079547	236.343	-1.53466	0.286141	-5.36329	8.17181e-08	8.07912e-07	H2-DMb1
ENSMUSG00000022780	185.758	-4.74286	0.88443	-5.36262	8.20238e-08	8.10607e-07	Meltf
ENSMUSG00000111080	41.6361	-1.16292	0.216879	-5.36205	8.22849e-08	8.12861e-07	AC153899,1
ENSMUSG00000085808	2.94396	-3.62345	0.675808	-5.36166	8.24601e-08	8.14264e-07	Gm14718
ENSMUSG00000064225	84.5372	-3.24197	0.604871	-5.35978	8.33238e-08	8.22463e-07	Paqr9
ENSMUSG00000076904	3.70231	-2.67126	0.498759	-5.3558	8.51782e-08	8.39418e-07	Traj25
ENSMUSG00000030616	90.5844	-2.55015	0.476359	-5.35342	8.63076e-08	8.49853e-07	Sytl2
ENSMUSG00000097566	7.04246	-3.1312	0.584994	-5.35253	8.67326e-08	8.53027e-07	A930024N18Rik
ENSMUSG00000031812	2817.17	-0.562976	0.105197	-5.35164	8.7163e-08	8.56917e-07	Map1lc3b
ENSMUSG00000079363	1373	-1.50528	0.281314	-5.35089	8.75222e-08	8.5976e-07	Gbp4
ENSMUSG00000049086	83.2068	-1.67276	0.312693	-5.34955	8.81738e-08	8.655e-07	Bmyc
ENSMUSG00000018907	78.3781	-4.60599	0.861186	-5.34842	8.87231e-08	8.70166e-07	Alox12e
ENSMUSG00000033715	13.2986	-3.03402	0.567301	-5.34817	8.88498e-08	8.71061e-07	Akr1c14
ENSMUSG00000020122	103.672	-1.371	0.256389	-5.34732	8.92668e-08	8.74452e-07	Egfr
ENSMUSG00000026942	1065.08	-0.6409	0.119887	-5.34585	8.99928e-08	8.81212e-07	Traf2
ENSMUSG00000105694	1.47386	-3.97981	0.744604	-5.34487	9.04844e-08	8.85321e-07	Gm43237
ENSMUSG00000076862	10.2628	-3.51061	0.656935	-5.34392	9.09602e-08	8.89268e-07	Trav19
ENSMUSG00000064262	1332.07	-2.14678	0.401757	-5.34349	9.11747e-08	8.91011e-07	Gimap8
ENSMUSG00000035557	786.395	-4.42649	0.828596	-5.34215	9.18501e-08	8.96898e-07	Krt17
ENSMUSG00000019960	418.689	-1.29448	0.242334	-5.34173	9.20657e-08	8.9829e-07	Dusp6
ENSMUSG00000034881	759.182	-1.56744	0.293443	-5.34157	9.21459e-08	8.98715e-07	Tbxa2r
ENSMUSG00000033416	729.322	-0.973798	0.182457	-5.33713	9.44312e-08	9.19064e-07	Gucd1
ENSMUSG00000029291	361.322	-0.521157	0.0976522	-5.33687	9.45634e-08	9.19739e-07	Rufy3
ENSMUSG00000032839	23.1231	-2.46388	0.461893	-5.3343	9.59163e-08	9.3216e-07	Trpc1
ENSMUSG00000020831	29.0794	-0.919796	0.172436	-5.33415	9.59952e-08	9.32558e-07	0610010K14Rik
ENSMUSG00000040728	55.5194	-4.0958	0.768024	-5.33291	9.66504e-08	9.3818e-07	Esrp1
ENSMUSG00000031298	65.6125	-2.29162	0.429946	-5.33001	9.82054e-08	9.52522e-07	Adgrg2
ENSMUSG00000053025	23.7632	-3.84898	0.722298	-5.3288	9.88621e-08	9.57381e-07	Sv2b
ENSMUSG00000069601	214.339	-3.00124	0.563536	-5.32573	1.00547e-07	9.72164e-07	Ank3
ENSMUSG00000041538	189.376	-2.17585	0.408586	-5.32533	1.00772e-07	9.73959e-07	H2-Ob
ENSMUSG00000029640	681.516	-0.894473	0.167973	-5.3251	1.00898e-07	9.74234e-07	Usp12
ENSMUSG00000026979	2679.05	-0.882321	0.165692	-5.32506	1.00919e-07	9.74234e-07	Psd4
ENSMUSG00000025492	900.057	-1.34521	0.252658	-5.32422	1.01388e-07	9.77989e-07	Ifitm3
ENSMUSG00000021285	684.675	-1.43237	0.269049	-5.32381	1.01615e-07	9.79795e-07	Ppp1r13b
ENSMUSG00000026380	23.456	-2.15342	0.404499	-5.32366	1.017e-07	9.80227e-07	Tfcp2l1
ENSMUSG00000026781	564.691	-1.0801	0.202897	-5.32341	1.01843e-07	9.81217e-07	Acbd5
ENSMUSG00000003282	24.8941	-2.43395	0.457456	-5.32062	1.03416e-07	9.94821e-07	Plag1
ENSMUSG00000050199	87.8469	-2.08603	0.392235	-5.31831	1.04737e-07	1.00634e-06	Lgr4
ENSMUSG00000043065	281.541	-1.43712	0.270394	-5.3149	1.06714e-07	1.02454e-06	Spice1
ENSMUSG00000048118	1374.81	-1.17219	0.220646	-5.31255	1.08102e-07	1.03665e-06	Arid4a
ENSMUSG00000087384	32.6537	-2.12122	0.399292	-5.31245	1.08159e-07	1.03679e-06	Gm15558
ENSMUSG00000038615	2048.34	-1.04538	0.197115	-5.30339	1.1367e-07	1.08665e-06	Nfe2l1
ENSMUSG00000035104	14.8127	-1.73179	0.32661	-5.30232	1.14343e-07	1.09181e-06	Eva1a
ENSMUSG00000111547	16.5513	-1.13245	0.213608	-5.30154	1.14828e-07	1.09559e-06	AC164565,1
ENSMUSG00000031950	1185.83	-0.549895	0.103734	-5.30099	1.15175e-07	1.09847e-06	Gabarapl2
ENSMUSG00000090394	575.495	-0.828802	0.156396	-5.29939	1.1619e-07	1.1073e-06	4930523C07Rik
ENSMUSG00000047415	78.7122	-2.77542	0.523809	-5.29854	1.16735e-07	1.11134e-06	Gpr68
ENSMUSG00000042677	263.502	-0.658632	0.124335	-5.29722	1.17581e-07	1.11881e-06	Zc3h12a
ENSMUSG00000076474	118.328	-4.69158	0.885783	-5.29653	1.18022e-07	1.12258e-06	Trbv17
ENSMUSG00000090919	3.11101	-3.49073	0.659106	-5.29616	1.18262e-07	1.12443e-06	Pabpc4l
ENSMUSG00000028248	3121.95	-0.67313	0.127102	-5.29596	1.1839e-07	1.12521e-06	Pnisr
ENSMUSG00000020889	223.309	-1.38577	0.261733	-5.2946	1.19275e-07	1.13275e-06	Nr1d1
ENSMUSG00000062154	1.121	-3.85154	0.727542	-5.29391	1.19726e-07	1.13615e-06	Tex33
ENSMUSG00000084860	2.57821	-3.62829	0.685594	-5.29219	1.20863e-07	1.14517e-06	2610204G07Rik
ENSMUSG00000022433	1711.29	-0.82701	0.156379	-5.28849	1.2333e-07	1.16765e-06	Csnk1e
ENSMUSG00000079560	16.696	-1.56704	0.296433	-5.2863	1.24817e-07	1.1799e-06	Hoxa3
ENSMUSG00000028842	371.624	-0.720421	0.136299	-5.2856	1.25295e-07	1.18397e-06	Ago3
ENSMUSG00000004031	10.0229	-3.26486	0.617927	-5.28357	1.26687e-07	1.1962e-06	Brinp2
ENSMUSG00000030775	1320.83	-1.47004	0.278354	-5.2812	1.28338e-07	1.21133e-06	Trat1
ENSMUSG00000024781	2240.56	-1.34061	0.253956	-5.27889	1.29968e-07	1.22577e-06	Lipa
ENSMUSG00000020910	362.586	-0.433117	0.0820542	-5.27842	1.303e-07	1.22796e-06	Adprm
ENSMUSG00000044400	1.87226	-3.86917	0.733095	-5.27786	1.30699e-07	1.23125e-06	Sowahd
ENSMUSG00000103928	18.1482	-1.75702	0.332974	-5.27675	1.31495e-07	1.23827e-06	Gm37893
ENSMUSG00000027936	1087.24	-0.42501	0.0805807	-5.27434	1.33233e-07	1.2532e-06	Crtc2
ENSMUSG00000039585	495.008	-0.997331	0.189124	-5.27343	1.33898e-07	1.25801e-06	Myo9a
ENSMUSG00000048766	51.1437	-5.39833	1.02385	-5.27259	1.34511e-07	1.26232e-06	Skint10
ENSMUSG00000031877	60.7596	-1.70187	0.322864	-5.27117	1.35553e-07	1.27113e-06	Ces2g
ENSMUSG00000046556	773.291	-0.637965	0.121044	-5.27054	1.36024e-07	1.27506e-06	Zfp319
ENSMUSG00000097194	31.23	-1.99837	0.37931	-5.26843	1.37596e-07	1.28783e-06	9330175E14Rik
ENSMUSG00000060002	568.564	-3.0759	0.584152	-5.26559	1.3974e-07	1.30591e-06	Chpt1
ENSMUSG00000026812	867.806	-0.557122	0.105836	-5.264	1.40952e-07	1.31623e-06	Tsc1
ENSMUSG00000047048	2.44725	-3.11413	0.591855	-5.26164	1.42775e-07	1.33224e-06	Olfr432
ENSMUSG00000114016	6.28531	-1.85873	0.353734	-5.2546	1.48348e-07	1.37692e-06	AC154552,7
ENSMUSG00000026070	91.9949	-2.80616	0.534247	-5.25255	1.50005e-07	1.39073e-06	Il18r1
ENSMUSG00000032570	957.968	-0.959799	0.182862	-5.24876	1.53123e-07	1.4175e-06	Atp2c1
ENSMUSG00000095387	14.571	-3.73594	0.711801	-5.24858	1.5328e-07	1.41842e-06	Trav6d-4
ENSMUSG00000022435	2.43277	-4.03392	0.768784	-5.24714	1.54481e-07	1.42845e-06	Upk3a
ENSMUSG00000073557	913.445	-0.833106	0.158864	-5.24414	1.5701e-07	1.44911e-06	Ppp1r12b
ENSMUSG00000014791	200.457	-1.53424	0.292584	-5.24376	1.57334e-07	1.45156e-06	Elmo3
ENSMUSG00000060657	2201.98	-0.921484	0.175806	-5.24148	1.59292e-07	1.46853e-06	Marf1
ENSMUSG00000022095	849.484	-0.611223	0.116643	-5.24011	1.60482e-07	1.47894e-06	Fam160b2
ENSMUSG00000022661	336.469	-1.62119	0.309399	-5.23979	1.60758e-07	1.48093e-06	Cd200
ENSMUSG00000089890	3.87775	-2.44604	0.46685	-5.23946	1.61051e-07	1.48251e-06	Gm16055
ENSMUSG00000046572	67.542	-1.91872	0.366217	-5.23931	1.61181e-07	1.48316e-06	Zfp518b
ENSMUSG00000104579	9.59709	-1.93317	0.369009	-5.23881	1.61618e-07	1.48606e-06	5830437K03Rik
ENSMUSG00000031548	261.192	-2.12305	0.405294	-5.23829	1.62068e-07	1.48965e-06	Sfrp1
ENSMUSG00000044349	53.2615	-3.64356	0.695582	-5.23815	1.6219e-07	1.49021e-06	Snhg11
ENSMUSG00000025950	904.19	-1.53464	0.293048	-5.2368	1.63382e-07	1.5006e-06	Idh1
ENSMUSG00000037709	169.979	-2.76419	0.528325	-5.23199	1.67696e-07	1.53907e-06	Fam13a
ENSMUSG00000054135	18.7532	-1.27678	0.244044	-5.23174	1.67926e-07	1.54061e-06	A430110L20Rik
ENSMUSG00000025014	14483.9	-2.38813	0.456491	-5.23148	1.68156e-07	1.54214e-06	Dntt
ENSMUSG00000033623	881.586	-0.63299	0.121007	-5.23102	1.6858e-07	1.54545e-06	Pcgf3
ENSMUSG00000004296	30.0287	-3.86439	0.739106	-5.22847	1.70918e-07	1.56397e-06	Il12b
ENSMUSG00000027351	339.13	-1.77756	0.34018	-5.22535	1.73825e-07	1.58702e-06	Spred1
ENSMUSG00000006418	2269.99	-0.500324	0.0957812	-5.22361	1.75466e-07	1.59903e-06	Rnf114
ENSMUSG00000040848	1940.49	-0.966982	0.185141	-5.22296	1.76086e-07	1.6041e-06	Sft2d2
ENSMUSG00000001630	253.265	-0.772029	0.147823	-5.22266	1.76374e-07	1.60553e-06	Stk38l
ENSMUSG00000025754	1.46042	-4.21104	0.80637	-5.22222	1.76788e-07	1.6087e-06	Agbl1
ENSMUSG00000000296	11.9942	-3.13575	0.600731	-5.21989	1.79026e-07	1.62785e-06	Tpd52l1
ENSMUSG00000036257	799.464	-1.30347	0.249951	-5.21488	1.83935e-07	1.66945e-06	Pnpla8
ENSMUSG00000032475	752.07	-0.750033	0.143849	-5.21403	1.84777e-07	1.67581e-06	Nck1
ENSMUSG00000054823	2085.36	-0.730632	0.140199	-5.21138	1.87439e-07	1.69744e-06	Nsd3
ENSMUSG00000025479	836.84	-3.81158	0.73144	-5.21107	1.87755e-07	1.69969e-06	Cyp2e1
ENSMUSG00000006344	93.3637	-1.57507	0.302283	-5.21059	1.88241e-07	1.70346e-06	Ggt5
ENSMUSG00000021719	5.35104	-2.55983	0.49144	-5.20884	1.90021e-07	1.71893e-06	Rgs7bp
ENSMUSG00000114255	3.03942	-2.80214	0.538001	-5.20843	1.9045e-07	1.72217e-06	AC175538,1
ENSMUSG00000081169	1.73728	-3.99257	0.766944	-5.20582	1.93146e-07	1.74271e-06	Gm12551
ENSMUSG00000001441	1744.22	-0.776806	0.14928	-5.20367	1.95393e-07	1.76104e-06	Npepps
ENSMUSG00000052656	434.374	-0.676725	0.130074	-5.20261	1.96507e-07	1.76849e-06	Rnf103
ENSMUSG00000005373	181.021	-4.44896	0.855382	-5.20114	1.98068e-07	1.78188e-06	Mlxipl
ENSMUSG00000022995	136.645	-2.09429	0.402676	-5.20093	1.98291e-07	1.78324e-06	Enah
ENSMUSG00000029312	140.715	-1.57541	0.303024	-5.19896	2.00406e-07	1.79897e-06	Klhl8
ENSMUSG00000102037	29.1295	-1.96512	0.377998	-5.19877	2.00613e-07	1.80017e-06	Bcl2a1a
ENSMUSG00000030733	1750.04	-0.544624	0.104783	-5.19765	2.01826e-07	1.80973e-06	Sh2b1
ENSMUSG00000032422	334.234	-0.902166	0.173594	-5.197	2.02526e-07	1.81535e-06	Snx14
ENSMUSG00000090589	21.1876	-3.24732	0.62509	-5.19497	2.04755e-07	1.83332e-06	Gm17180
ENSMUSG00000049321	11.9816	-3.09466	0.595728	-5.19476	2.04987e-07	1.83473e-06	Zfp2
ENSMUSG00000041977	593.46	-1.10161	0.212075	-5.19442	2.05354e-07	1.83735e-06	Arhgef11
ENSMUSG00000005540	64.3723	-3.83649	0.738969	-5.19168	2.08404e-07	1.86396e-06	Fcer2a
ENSMUSG00000068962	1.3276	-3.59664	0.692984	-5.19007	2.1021e-07	1.87942e-06	Zfp114
ENSMUSG00000109618	7.83216	-1.65658	0.319307	-5.18804	2.1252e-07	1.89801e-06	Gm45527
ENSMUSG00000026077	57.4013	-2.05812	0.396748	-5.18748	2.13164e-07	1.90169e-06	Npas2
ENSMUSG00000076903	3.92415	-2.5223	0.486312	-5.18659	2.14177e-07	1.90933e-06	Traj26
ENSMUSG00000057719	13.2941	-2.36619	0.456263	-5.18603	2.14824e-07	1.91441e-06	Sh3rf2
ENSMUSG00000044952	49.5678	-2.15873	0.416332	-5.18512	2.15875e-07	1.92238e-06	Kctd21
ENSMUSG00000058248	27.046	-2.07536	0.400438	-5.18273	2.18662e-07	1.94579e-06	Kcnh1
ENSMUSG00000054892	696.425	-2.15275	0.415516	-5.1809	2.20819e-07	1.96356e-06	Txk
ENSMUSG00000030019	2517.65	-0.853349	0.16478	-5.17871	2.23426e-07	1.98531e-06	Fbxl14
ENSMUSG00000040502	61.9268	-1.67392	0.323245	-5.17849	2.23686e-07	1.98619e-06	2009-03-01
ENSMUSG00000034160	5822.31	-1.04678	0.202193	-5.17715	2.253e-07	1.99907e-06	Ogt
ENSMUSG00000001524	1215.15	-1.4387	0.277979	-5.17558	2.27209e-07	2.01502e-06	Gtf2h4
ENSMUSG00000050050	2.21457	-3.42983	0.662802	-5.17474	2.28228e-07	2.02286e-06	Ccdc158
ENSMUSG00000087177	416.404	-0.836073	0.161599	-5.17375	2.29444e-07	2.03144e-06	E130307A14Rik
ENSMUSG00000032311	90.8968	-3.55517	0.687303	-5.17264	2.30808e-07	2.04278e-06	Nrg4
ENSMUSG00000029205	694.494	-2.03094	0.392646	-5.17244	2.31062e-07	2.04282e-06	Chrna9
ENSMUSG00000028630	1020.13	-1.00684	0.194653	-5.17248	2.31011e-07	2.04282e-06	Dyrk2
ENSMUSG00000020305	379.11	-0.532098	0.102871	-5.17251	2.30975e-07	2.04282e-06	Asb3
ENSMUSG00000040054	4559.04	-1.00251	0.193835	-5.17198	2.31632e-07	2.04712e-06	Baz2a
ENSMUSG00000032611	15.8837	-1.14706	0.221912	-5.16898	2.35372e-07	2.07719e-06	1700102P08Rik
ENSMUSG00000047514	1169.25	-0.741596	0.14352	-5.1672	2.37632e-07	2.09563e-06	Tspyl1
ENSMUSG00000073420	1.82449	-3.57291	0.691481	-5.16704	2.37834e-07	2.09666e-06	Btnl5-ps
ENSMUSG00000074796	23.3084	-2.50796	0.485395	-5.16684	2.3808e-07	2.09807e-06	Slc4a11
ENSMUSG00000041390	204.697	-1.3287	0.257258	-5.16486	2.40622e-07	2.11864e-06	Mdfic
ENSMUSG00000036574	1.34087	-4.10981	0.795744	-5.16473	2.40781e-07	2.11884e-06	Tex44
ENSMUSG00000029026	7.47513	-2.40941	0.466788	-5.16168	2.44745e-07	2.15064e-06	Trp73
ENSMUSG00000027709	352.382	-1.43357	0.277772	-5.16095	2.45705e-07	2.15802e-06	Mccc1
ENSMUSG00000031710	1047.62	-6.36707	1.23399	-5.15973	2.47311e-07	2.17086e-06	Ucp1
ENSMUSG00000020137	401.248	-1.16743	0.226274	-5.15937	2.47782e-07	2.17422e-06	Thap2
ENSMUSG00000041132	341.877	-1.00693	0.19518	-5.15897	2.48315e-07	2.17811e-06	N4bp2l1
ENSMUSG00000079083	143.782	-0.980777	0.190244	-5.15537	2.53132e-07	2.21879e-06	Jrkl
ENSMUSG00000094619	30.9726	-2.94669	0.57179	-5.15345	2.55737e-07	2.23968e-06	Trav14d-3-dv8
ENSMUSG00000056055	18.1023	-1.13455	0.220173	-5.15302	2.56319e-07	2.2435e-06	Sag
ENSMUSG00000039879	865.262	-0.878737	0.17054	-5.15267	2.56805e-07	2.24618e-06	Heca
ENSMUSG00000028136	1319.59	-0.795027	0.154329	-5.15149	2.58423e-07	2.25952e-06	Snx27
ENSMUSG00000045201	54.9525	-3.10462	0.602804	-5.1503	2.60075e-07	2.27261e-06	Lrrc3b
ENSMUSG00000020743	793.602	-0.875728	0.170046	-5.14994	2.60568e-07	2.27525e-06	Mif4gd
ENSMUSG00000026648	608.337	-1.19311	0.231755	-5.14818	2.63023e-07	2.29484e-06	Dclre1c
ENSMUSG00000032298	423.832	-0.870539	0.169129	-5.1472	2.64409e-07	2.30612e-06	Neil1
ENSMUSG00000090641	23.0935	-1.3324	0.258912	-5.14615	2.65882e-07	2.31732e-06	Zfp712
ENSMUSG00000025733	543.278	-0.618851	0.120308	-5.1439	2.69089e-07	2.34278e-06	Rhot2
ENSMUSG00000027580	1771.88	-0.918016	0.178576	-5.14076	2.73626e-07	2.37891e-06	Helz2
ENSMUSG00000049971	3.93262	-2.88178	0.560629	-5.14026	2.74364e-07	2.38448e-06	Glt1d1
ENSMUSG00000063659	1582.7	-1.44672	0.28151	-5.13914	2.75994e-07	2.39695e-06	Zbtb18
ENSMUSG00000037172	622.087	-1.64937	0.32118	-5.13534	2.81633e-07	2.44162e-06	E330009J07Rik
ENSMUSG00000037921	102.531	-1.76355	0.343589	-5.13273	2.85574e-07	2.47055e-06	Ddx60
ENSMUSG00000028437	898.068	-0.399982	0.0779422	-5.13178	2.87016e-07	2.47954e-06	Ubap1
ENSMUSG00000061894	192.007	-1.14897	0.223944	-5.13063	2.88778e-07	2.49388e-06	Zscan20
ENSMUSG00000028777	3.12863	-3.7366	0.728801	-5.12704	2.94326e-07	2.53823e-06	Gnat3
ENSMUSG00000021062	347.576	-2.35935	0.460267	-5.12603	2.95911e-07	2.5501e-06	Rab15
ENSMUSG00000024507	1449.53	-0.686518	0.133943	-5.12543	2.96855e-07	2.55735e-06	Hsd17b4
ENSMUSG00000033769	292.831	-1.83911	0.35895	-5.12359	2.99766e-07	2.58061e-06	Exoc6b
ENSMUSG00000029381	37.4638	-1.71099	0.33415	-5.12041	3.04875e-07	2.62e-06	Shroom3
ENSMUSG00000004347	32.9548	-3.13154	0.611602	-5.12023	3.05157e-07	2.62152e-06	Pde1c
ENSMUSG00000054387	3562.21	-0.639673	0.125049	-5.11539	3.13093e-07	2.685e-06	Mdm4
ENSMUSG00000096929	7.55797	-2.1405	0.418531	-5.11432	3.14868e-07	2.69834e-06	A330023F24Rik
ENSMUSG00000040472	464.799	-0.566309	0.110729	-5.11438	3.14779e-07	2.69834e-06	Rabggta
ENSMUSG00000076540	41.5916	-4.21651	0.824666	-5.113	3.17091e-07	2.71643e-06	Igkv4-80
ENSMUSG00000043029	4.79062	-2.8842	0.564209	-5.11193	3.18881e-07	2.73082e-06	Trpv3
ENSMUSG00000029134	29.7177	-3.61392	0.707186	-5.11029	3.21665e-07	2.74988e-06	Plb1
ENSMUSG00000049511	3.5257	-2.81479	0.550864	-5.10978	3.22534e-07	2.75538e-06	Htr1b
ENSMUSG00000113529	14.4911	-1.67673	0.328174	-5.10927	3.23398e-07	2.76181e-06	AC159649,3
ENSMUSG00000028960	1828.21	-0.604653	0.118348	-5.10909	3.2371e-07	2.76351e-06	Ube4b
ENSMUSG00000020083	14.0921	-2.17738	0.426217	-5.10863	3.24509e-07	2.76937e-06	2010107G23Rik
ENSMUSG00000026305	1562.69	-0.674173	0.13199	-5.10774	3.26031e-07	2.78139e-06	Lrrfip1
ENSMUSG00000051098	95.1574	-1.19261	0.233562	-5.10618	3.28733e-07	2.79946e-06	Mblac2
ENSMUSG00000030102	1929.62	-1.34756	0.263968	-5.10502	3.30754e-07	2.81484e-06	Itpr1
ENSMUSG00000024376	34.1539	-1.81384	0.355545	-5.10158	3.36835e-07	2.86263e-06	Epb41l4a
ENSMUSG00000078922	108.446	-2.32522	0.455822	-5.10116	3.37582e-07	2.86699e-06	Tgtp1
ENSMUSG00000032557	789.511	-0.50014	0.0980464	-5.10106	3.37761e-07	2.86752e-06	Uba5
ENSMUSG00000050066	16.1113	-4.26698	0.836727	-5.09961	3.40362e-07	2.88761e-06	A130023I24Rik
ENSMUSG00000042680	11.5412	-2.35537	0.461982	-5.09839	3.42551e-07	2.90418e-06	Garem1
ENSMUSG00000022510	205.265	-3.48505	0.68367	-5.09756	3.44054e-07	2.9139e-06	Trp63
ENSMUSG00000020170	817.655	-0.858094	0.168451	-5.09404	3.50509e-07	2.96653e-06	Frs2
ENSMUSG00000018796	1398.31	-3.10006	0.608701	-5.09291	3.52607e-07	2.98224e-06	Acsl1
ENSMUSG00000037463	69.825	-2.75732	0.541515	-5.09186	3.54569e-07	2.9978e-06	Fbxo27
ENSMUSG00000108283	2.37355	-3.54222	0.695993	-5.08944	3.59113e-07	3.03413e-06	Gm44008
ENSMUSG00000024302	20.1663	-2.63239	0.517434	-5.08741	3.62994e-07	3.06376e-06	Dtna
ENSMUSG00000042404	1279.47	-0.926325	0.182125	-5.0862	3.65318e-07	3.08232e-06	Dennd4b
ENSMUSG00000050357	6684.35	-1.30588	0.25676	-5.086	3.65687e-07	3.08437e-06	Carmil2
ENSMUSG00000101122	6.3583	-1.60701	0.316011	-5.08529	3.67064e-07	3.0928e-06	Gm17971
ENSMUSG00000104669	81.2926	-3.1656	0.622536	-5.08501	3.67603e-07	3.09628e-06	Gm38411
ENSMUSG00000005371	1647.23	-0.921215	0.18121	-5.0837	3.70147e-07	3.11557e-06	Fbxo11
ENSMUSG00000074269	6.8719	-2.34191	0.460695	-5.08342	3.707e-07	3.11809e-06	Rec114
ENSMUSG00000024855	948.213	-0.594631	0.116985	-5.08297	3.71569e-07	3.12433e-06	Pacs1
ENSMUSG00000016239	34.204	-2.41238	0.474888	-5.07989	3.77646e-07	3.17001e-06	Lonrf3
ENSMUSG00000076884	1.42853	-3.45819	0.680802	-5.07958	3.78268e-07	3.17415e-06	Traj46
ENSMUSG00000059327	16.3538	-1.99165	0.392105	-5.07938	3.78666e-07	3.1764e-06	Eda
ENSMUSG00000055116	874.126	-1.5565	0.306463	-5.07894	3.79553e-07	3.18275e-06	Arntl
ENSMUSG00000078490	330.908	-3.62826	0.714665	-5.07686	3.83714e-07	3.21217e-06	Cfap74
ENSMUSG00000064201	1.42338	-3.70005	0.728927	-5.07603	3.85403e-07	3.22301e-06	Krt2
ENSMUSG00000020986	481.239	-0.933048	0.183857	-5.07485	3.87806e-07	3.2409e-06	Sec23a
ENSMUSG00000046275	237.492	-3.56635	0.702773	-5.07468	3.8814e-07	3.24149e-06	Tusc5
ENSMUSG00000019368	11.0587	-4.96111	0.977708	-5.07422	3.89087e-07	3.24719e-06	Sec14l4
ENSMUSG00000024456	3416.8	-0.67911	0.133869	-5.07295	3.91689e-07	3.26669e-06	Diaph1
ENSMUSG00000034781	707.25	-0.750043	0.14787	-5.07232	3.92998e-07	3.27427e-06	Gna11
ENSMUSG00000032092	104.419	-2.73664	0.539558	-5.072	3.93663e-07	3.2787e-06	Mpzl2
ENSMUSG00000014932	74.7861	-2.09522	0.413119	-5.07172	3.94236e-07	3.28125e-06	Yes1
ENSMUSG00000104951	11.8259	-1.34684	0.265571	-5.07147	3.94757e-07	3.28448e-06	Gm43413
ENSMUSG00000020184	1594.74	-0.59019	0.116398	-5.07046	3.96861e-07	3.30086e-06	Mdm2
ENSMUSG00000033526	403.779	-1.32926	0.262218	-5.0693	3.99285e-07	3.31766e-06	Ppip5k1
ENSMUSG00000027012	2160.26	-0.375465	0.0740894	-5.06773	4.0259e-07	3.34286e-06	Dync1i2
ENSMUSG00000023795	39.0651	-1.50772	0.297874	-5.06161	4.15726e-07	3.44727e-06	Pisd-ps2
ENSMUSG00000021069	902.362	-3.02373	0.597399	-5.0615	4.15975e-07	3.44818e-06	Pygl
ENSMUSG00000035356	216.363	-1.15344	0.228049	-5.05786	4.23995e-07	3.51292e-06	Nfkbiz
ENSMUSG00000046314	41.1052	-2.71609	0.537142	-5.05656	4.26886e-07	3.53386e-06	Stxbp6
ENSMUSG00000030345	7.3625	-2.25252	0.446021	-5.05026	4.41207e-07	3.64626e-06	Dyrk4
ENSMUSG00000098146	17.6779	-1.16122	0.229941	-5.05007	4.41638e-07	3.6486e-06	Gm26935
ENSMUSG00000021318	36.4293	-1.88833	0.374107	-5.04756	4.47487e-07	3.69444e-06	Gli3
ENSMUSG00000031970	10.01	-2.14137	0.424279	-5.04709	4.486e-07	3.70113e-06	Dbndd1
ENSMUSG00000097751	2.38027	-3.10477	0.615274	-5.04616	4.50788e-07	3.71545e-06	Gm26690
ENSMUSG00000076873	48.7064	-5.18278	1.0271	-5.04605	4.51043e-07	3.7163e-06	Trdv5
ENSMUSG00000050359	19.9471	-3.0139	0.597413	-5.04492	4.53719e-07	3.73585e-06	Sprr1a
ENSMUSG00000074024	27.5774	-1.3249	0.262627	-5.04482	4.53947e-07	3.73647e-06	4632427E13Rik
ENSMUSG00000005763	5927.3	-0.950943	0.188596	-5.04222	4.60162e-07	3.78509e-06	Cd247
ENSMUSG00000039234	255.169	-1.42704	0.283044	-5.04176	4.61277e-07	3.79299e-06	Sec24d
ENSMUSG00000030822	1404.62	-0.53143	0.105409	-5.0416	4.61653e-07	3.79481e-06	Prr14
ENSMUSG00000103388	31.3926	-1.59426	0.316332	-5.03982	4.65963e-07	3.82257e-06	Gm37581
ENSMUSG00000000794	25.9165	-3.02218	0.599943	-5.03745	4.71775e-07	3.86638e-06	Kcnn3
ENSMUSG00000040158	299.714	-0.914693	0.181587	-5.03721	4.72377e-07	3.87002e-06	Tax1bp3
ENSMUSG00000082776	6.44756	-1.72631	0.342775	-5.03628	4.74661e-07	3.88745e-06	Gm7061
ENSMUSG00000061259	1.72911	-3.72682	0.740132	-5.03534	4.77008e-07	3.90276e-06	Tmprss11d
ENSMUSG00000076883	1.48983	-4.00022	0.794829	-5.0328	4.83356e-07	3.94682e-06	Traj48
ENSMUSG00000098447	13.1146	-1.2735	0.253084	-5.03194	4.85544e-07	3.96336e-06	Gm27184
ENSMUSG00000106164	2.2787	-3.68224	0.731862	-5.03134	4.87076e-07	3.97455e-06	9430085M18Rik
ENSMUSG00000078763	180.889	-2.15021	0.427412	-5.03077	4.88515e-07	3.98497e-06	Slfn1
ENSMUSG00000025025	933.028	-0.919535	0.182833	-5.02937	4.92082e-07	4.01141e-06	Mxi1
ENSMUSG00000109669	1.68637	-3.46185	0.688386	-5.02894	4.93196e-07	4.01915e-06	Gm45472
ENSMUSG00000022425	420.449	-2.38815	0.474912	-5.02862	4.94019e-07	4.02321e-06	Enpp2
ENSMUSG00000006948	1.39681	-4.1615	0.827751	-5.02748	4.96956e-07	4.0431e-06	Klk4
ENSMUSG00000025153	16754.9	-2.73473	0.544128	-5.02589	5.01099e-07	4.0741e-06	Fasn
ENSMUSG00000028457	4.2871	-2.53638	0.505096	-5.02158	5.12484e-07	4.16391e-06	Atp8b5
ENSMUSG00000032446	19.1416	-3.50111	0.697331	-5.02072	5.14773e-07	4.17974e-06	Eomes
ENSMUSG00000049350	2.44261	-3.11897	0.621236	-5.02059	5.1514e-07	4.18135e-06	Zg16
ENSMUSG00000027751	1521.12	-0.843338	0.168019	-5.01931	5.18583e-07	4.20651e-06	Supt20
ENSMUSG00000021796	164.475	-1.89728	0.378044	-5.01868	5.20272e-07	4.21667e-06	Bmpr1a
ENSMUSG00000043557	73.3932	-2.07361	0.413197	-5.01845	5.20897e-07	4.21971e-06	Mdga1
ENSMUSG00000037944	500.264	-2.6336	0.524953	-5.01684	5.25285e-07	4.25246e-06	Ccr7
ENSMUSG00000068854	180.301	-0.91351	0.182166	-5.01471	5.31132e-07	4.29696e-06	Hist2h2be
ENSMUSG00000085484	1.70508	-3.98006	0.79383	-5.01375	5.33795e-07	4.31424e-06	Gm13539
ENSMUSG00000025610	17.1057	-3.04107	0.606709	-5.0124	5.37542e-07	4.3431e-06	Map3k7cl
ENSMUSG00000001098	1240.77	-0.459117	0.0916374	-5.01015	5.43878e-07	4.38708e-06	Kctd10
ENSMUSG00000031391	86.121	-1.58544	0.316465	-5.00984	5.44758e-07	4.39274e-06	L1cam
ENSMUSG00000086924	3.0706	-3.31413	0.661571	-5.00949	5.45759e-07	4.39936e-06	Gm11766
ENSMUSG00000000266	57.8931	-2.04808	0.408884	-5.00897	5.47228e-07	4.40831e-06	Mid2
ENSMUSG00000039763	104.886	-1.58394	0.316225	-5.00889	5.47453e-07	4.40868e-06	Dnajc28
ENSMUSG00000030284	197.092	-1.66177	0.331811	-5.00819	5.49446e-07	4.42328e-06	Creld1
ENSMUSG00000075318	5.24801	-2.03663	0.406736	-5.00724	5.52158e-07	4.44075e-06	Scn2a
ENSMUSG00000041609	953.791	-1.47004	0.293772	-5.00402	5.61479e-07	4.50982e-06	Bicdl1
ENSMUSG00000040350	65.9162	-1.78124	0.355967	-5.00395	5.61681e-07	4.50996e-06	Trim7
ENSMUSG00000006930	68.6002	-1.91846	0.383512	-5.00236	5.66323e-07	4.54575e-06	Hap1
ENSMUSG00000030341	1317.47	-0.923288	0.184624	-5.00091	5.70599e-07	4.57559e-06	Tnfrsf1a
ENSMUSG00000034570	5.78597	-2.56941	0.513942	-4.99942	5.75038e-07	4.60479e-06	Inpp5j
ENSMUSG00000032702	160.377	-2.13981	0.428285	-4.99623	5.84627e-07	4.67892e-06	Kank1
ENSMUSG00000027111	1383.32	-1.26317	0.252966	-4.99342	5.93194e-07	4.73669e-06	Itga6
ENSMUSG00000040283	49.1225	-3.12421	0.62602	-4.9906	6.01924e-07	4.7986e-06	Btnl9
ENSMUSG00000107608	10.9603	-1.24227	0.248944	-4.99016	6.03283e-07	4.80632e-06	Gm43863
ENSMUSG00000108504	1.34163	-3.61529	0.724635	-4.98911	6.06582e-07	4.82791e-06	Gm4265
ENSMUSG00000018740	227.913	-1.85994	0.373056	-4.9857	6.17368e-07	4.9074e-06	Slc25a35
ENSMUSG00000032491	52.046	-1.05169	0.210993	-4.98446	6.2136e-07	4.93434e-06	Nradd
ENSMUSG00000062609	98.753	-1.67544	0.336138	-4.98438	6.21605e-07	4.93469e-06	Kcnj15
ENSMUSG00000029417	95.8843	-2.95799	0.593675	-4.98251	6.27638e-07	4.97615e-06	Cxcl9
ENSMUSG00000026102	369.892	-1.07371	0.215494	-4.98255	6.27515e-07	4.97615e-06	Inpp1
ENSMUSG00000103039	32.1998	-0.915102	0.183767	-4.97969	6.3686e-07	5.03789e-06	Gm37123
ENSMUSG00000037826	387.851	-1.26536	0.254177	-4.97826	6.41585e-07	5.07201e-06	Ppm1k
ENSMUSG00000086370	148.922	-0.780291	0.156792	-4.97659	6.47134e-07	5.10766e-06	Ftx
ENSMUSG00000049184	101.205	-1.14017	0.229144	-4.97579	6.49831e-07	5.1273e-06	Purg
ENSMUSG00000039057	25.8418	-2.77979	0.558821	-4.97438	6.54574e-07	5.16142e-06	Myo16
ENSMUSG00000011632	5.51136	-2.8394	0.570892	-4.97363	6.57109e-07	5.1796e-06	Pinlyp
ENSMUSG00000029060	482.645	-0.766056	0.154038	-4.97316	6.58715e-07	5.18907e-06	Mib2
ENSMUSG00000025702	294.431	-1.59666	0.321212	-4.97072	6.67043e-07	5.25299e-06	2008-03-01
ENSMUSG00000054792	343.716	-0.626165	0.125987	-4.97007	6.69292e-07	5.26901e-06	Klhl18
ENSMUSG00000103651	136.032	-0.963179	0.19381	-4.96971	6.7052e-07	5.27699e-06	Gm37206
ENSMUSG00000034212	96.3166	-2.13449	0.429608	-4.96846	6.74872e-07	5.30784e-06	Ankmy1
ENSMUSG00000063296	7.25032	-2.79744	0.563121	-4.96775	6.77329e-07	5.32546e-06	Tmem117
ENSMUSG00000095514	2.84708	-3.59115	0.72296	-4.96729	6.78956e-07	5.33655e-06	D13Ertd608e
ENSMUSG00000103901	9.76963	-1.3674	0.275298	-4.967	6.79964e-07	5.34105e-06	Gm37499
ENSMUSG00000049755	395.888	-0.977721	0.196843	-4.96701	6.79917e-07	5.34105e-06	Zfp672
ENSMUSG00000024867	35.2709	-3.5371	0.712415	-4.96494	6.8721e-07	5.3928e-06	Pip5k1b
ENSMUSG00000027339	2383.89	-0.936593	0.188699	-4.96343	6.92592e-07	5.43156e-06	Rassf2
ENSMUSG00000029005	12.7351	-1.76123	0.354954	-4.96186	6.98198e-07	5.47378e-06	Draxin
ENSMUSG00000052730	2.11482	-3.59023	0.723762	-4.96051	7.03086e-07	5.51e-06	Gm5111
ENSMUSG00000020393	4131.22	-1.16723	0.235313	-4.96032	7.03789e-07	5.51234e-06	Kremen1
ENSMUSG00000029755	1.92687	-3.42438	0.690437	-4.95972	7.05944e-07	5.52394e-06	Dlx5
ENSMUSG00000076471	187.627	-4.37713	0.882736	-4.9586	7.1004e-07	5.55069e-06	Trbv14
ENSMUSG00000069539	773.33	-0.684113	0.138075	-4.95464	7.24641e-07	5.65225e-06	Scyl2
ENSMUSG00000035840	305.438	-1.21341	0.245009	-4.95252	7.32594e-07	5.71066e-06	Lysmd3
ENSMUSG00000098731	2.64614	-2.72028	0.549298	-4.95228	7.33493e-07	5.71585e-06	Mir7027
ENSMUSG00000024383	872.261	-0.84378	0.170397	-4.95184	7.35136e-07	5.72684e-06	Map3k2
ENSMUSG00000022878	729.024	-3.63962	0.735095	-4.95122	7.37504e-07	5.74164e-06	Adipoq
ENSMUSG00000097246	14.1584	-1.33106	0.268847	-4.95099	7.38363e-07	5.74651e-06	Gm26890
ENSMUSG00000044867	192.83	-2.15836	0.436034	-4.94998	7.4223e-07	5.77112e-06	Gimap1os
ENSMUSG00000036295	15.4196	-1.67397	0.338206	-4.94956	7.43822e-07	5.78168e-06	Lrrn3
ENSMUSG00000102302	18.5902	-1.75683	0.355021	-4.94852	7.47809e-07	5.81083e-06	Gm38190
ENSMUSG00000104108	6.19844	-1.61741	0.326879	-4.94802	7.49714e-07	5.82195e-06	Gm37876
ENSMUSG00000025235	289.419	-0.904651	0.182831	-4.94802	7.49705e-07	5.82195e-06	Bbs4
ENSMUSG00000045232	6.23162	-3.09521	0.625788	-4.9461	7.57162e-07	5.87236e-06	Rln3
ENSMUSG00000039652	25.4122	-1.75223	0.354309	-4.94549	7.59516e-07	5.88505e-06	Cpeb3
ENSMUSG00000113170	7.36988	-1.65972	0.335641	-4.94492	7.61739e-07	5.8967e-06	AC132344,1
ENSMUSG00000021822	175.493	-1.15388	0.233343	-4.94498	7.61527e-07	5.8967e-06	Plau
ENSMUSG00000026466	1421.59	-0.544318	0.110084	-4.9446	7.63023e-07	5.90292e-06	Tor1aip1
ENSMUSG00000024006	3013.71	-0.575442	0.116434	-4.94223	7.72344e-07	5.96752e-06	Stk38
ENSMUSG00000069136	10.1304	-1.28576	0.260269	-4.94011	7.80772e-07	6.02695e-06	A130006I12Rik
ENSMUSG00000061780	2842.02	-3.66874	0.742669	-4.93994	7.81451e-07	6.0303e-06	Cfd
ENSMUSG00000076921	12.1741	-3.16729	0.64119	-4.93971	7.8238e-07	6.03557e-06	Traj7
ENSMUSG00000076499	429.941	-4.09498	0.829269	-4.93806	7.89049e-07	6.08511e-06	Trbv31
ENSMUSG00000024526	742.036	-4.98484	1.00958	-4.93755	7.9111e-07	6.09909e-06	Cidea
ENSMUSG00000031154	2503.42	-0.476	0.0964441	-4.9355	7.99454e-07	6.16148e-06	Otud5
ENSMUSG00000002057	132.263	-5.3363	1.0816	-4.93372	8.0678e-07	6.216e-06	Foxn1
ENSMUSG00000000037	22.5284	-3.54994	0.719604	-4.93319	8.0899e-07	6.22802e-06	Scml2
ENSMUSG00000033214	2.14855	-3.32534	0.674119	-4.93287	8.10299e-07	6.23529e-06	Slitrk5
ENSMUSG00000019943	990.052	-1.02638	0.20808	-4.93261	8.11368e-07	6.24157e-06	Atp2b1
ENSMUSG00000058728	3.03797	-3.4327	0.696272	-4.93011	8.21824e-07	6.31212e-06	Cd300c
ENSMUSG00000100201	22.2993	-1.08035	0.219131	-4.93015	8.21661e-07	6.31212e-06	Gm29093
ENSMUSG00000037933	1255.15	-0.665299	0.134943	-4.93021	8.21411e-07	6.31212e-06	Bicd2
ENSMUSG00000022861	235.013	-3.64878	0.74019	-4.92952	8.24331e-07	6.3294e-06	Dgkg
ENSMUSG00000074151	604.896	-1.20039	0.243548	-4.92878	8.27431e-07	6.34725e-06	Nlrc5
ENSMUSG00000059486	777.604	-0.640521	0.13011	-4.92292	8.52627e-07	6.52831e-06	Kbtbd2
ENSMUSG00000025213	29.6271	-1.71716	0.348886	-4.92184	8.57361e-07	6.56047e-06	Kazald1
ENSMUSG00000053769	99.9535	-0.739263	0.150222	-4.92112	8.60485e-07	6.58233e-06	Lysmd1
ENSMUSG00000079669	4.7913	-2.69157	0.547025	-4.92039	8.63729e-07	6.60097e-06	Gm17396
ENSMUSG00000021379	23.8768	-2.22883	0.453448	-4.91528	8.86558e-07	6.76493e-06	Id4
ENSMUSG00000017167	50.201	-2.07525	0.422219	-4.91512	8.87301e-07	6.7685e-06	Cntnap1
ENSMUSG00000040594	7.79222	-1.78393	0.363068	-4.91349	8.94715e-07	6.8187e-06	Ranbp17
ENSMUSG00000057143	834.782	-1.00657	0.204866	-4.91333	8.9541e-07	6.82188e-06	Trim12c
ENSMUSG00000097274	8.81097	-1.58504	0.322613	-4.91312	8.96366e-07	6.82705e-06	Gm26564
ENSMUSG00000030313	37.3892	-1.6649	0.338928	-4.91225	9.0037e-07	6.8533e-06	Dennd5b
ENSMUSG00000049092	3.3994	-2.49262	0.50774	-4.90925	9.14251e-07	6.95034e-06	Gpr137c
ENSMUSG00000051000	30.9768	-2.48269	0.505778	-4.90865	9.17057e-07	6.96952e-06	Fam160a1
ENSMUSG00000050179	363.799	-2.72876	0.555935	-4.90841	9.18183e-07	6.97592e-06	A930002I21Rik
ENSMUSG00000105135	27.8009	-1.06238	0.21647	-4.90776	9.21208e-07	6.99674e-06	Gm43667
ENSMUSG00000112057	5.16374	-3.13548	0.638946	-4.90728	9.23493e-07	7.01193e-06	AC147512,1
ENSMUSG00000040181	195.482	-2.23136	0.454815	-4.90609	9.29085e-07	7.05003e-06	Fmo1
ENSMUSG00000089917	605.703	-0.622532	0.126903	-4.90559	9.3149e-07	7.0661e-06	Uckl1
ENSMUSG00000084803	114.685	-3.78397	0.771389	-4.9054	9.32372e-07	7.07061e-06	5830444B04Rik
ENSMUSG00000022456	51.2567	-2.02247	0.41231	-4.90522	9.33249e-07	7.07289e-06	2003-09-01
ENSMUSG00000028354	8.788	-3.17579	0.647852	-4.90203	9.48519e-07	7.18419e-06	Fmn2
ENSMUSG00000048528	1.43443	-3.70753	0.756494	-4.90094	9.53784e-07	7.21739e-06	Nkx1-2
ENSMUSG00000027806	416.948	-0.944	0.192616	-4.90095	9.53722e-07	7.21739e-06	Tsc22d2
ENSMUSG00000063558	57.329	-2.19519	0.448041	-4.89954	9.60616e-07	7.26462e-06	Aox1
ENSMUSG00000038708	2006.9	-0.748456	0.152824	-4.89752	9.70549e-07	7.33297e-06	Golga4
ENSMUSG00000044197	330.766	-1.55043	0.316863	-4.89308	9.92704e-07	7.48655e-06	Gpr146
ENSMUSG00000059898	116.688	-2.91626	0.596082	-4.89237	9.96282e-07	7.50893e-06	Dsc3
ENSMUSG00000092341	9967.39	-1.30948	0.2677	-4.89161	1.00014e-06	7.53335e-06	Malat1
ENSMUSG00000037788	312.342	-2.0257	0.414148	-4.89124	1.00203e-06	7.54069e-06	Vopp1
ENSMUSG00000022225	18.0235	-3.28677	0.672106	-4.89026	1.00704e-06	7.5714e-06	Cma1
ENSMUSG00000097471	189.09	-1.08022	0.221091	-4.88586	1.0298e-06	7.71657e-06	5830432E09Rik
ENSMUSG00000037108	187.501	-1.15934	0.237301	-4.88554	1.03146e-06	7.72667e-06	Zcwpw1
ENSMUSG00000039157	623.964	-1.7066	0.349344	-4.88516	1.03346e-06	7.7393e-06	Fam102a
ENSMUSG00000086328	2.43747	-2.77357	0.567775	-4.88499	1.03434e-06	7.74262e-06	2700033N17Rik
ENSMUSG00000030413	43.2738	-1.90366	0.38977	-4.88405	1.0393e-06	7.7759e-06	Pglyrp1
ENSMUSG00000037062	2402.8	-0.906716	0.185652	-4.88395	1.03983e-06	7.77749e-06	Sh3glb1
ENSMUSG00000084881	2.27007	-2.83327	0.580184	-4.8834	1.04271e-06	7.79666e-06	Gm15585
ENSMUSG00000041762	65.5166	-1.02614	0.210186	-4.88205	1.04989e-06	7.848e-06	Gpr155
ENSMUSG00000030047	937.837	-0.84939	0.174126	-4.87803	1.07148e-06	8.00211e-06	Arhgap25
ENSMUSG00000038894	377.393	-2.00601	0.411252	-4.87782	1.07267e-06	8.00855e-06	Irs2
ENSMUSG00000037300	1600.64	-0.520339	0.106705	-4.87642	1.0803e-06	8.05328e-06	Ttc13
ENSMUSG00000030165	14.9818	-2.63912	0.541308	-4.87545	1.08559e-06	8.09024e-06	Klrd1
ENSMUSG00000030793	2336.11	-0.795529	0.163175	-4.8753	1.08642e-06	8.09401e-06	Pycard
ENSMUSG00000114907	15.2377	-1.18786	0.243714	-4.874	1.09363e-06	8.14272e-06	AC173482,6
ENSMUSG00000003228	182.941	-0.982745	0.201655	-4.8734	1.09696e-06	8.16506e-06	Grk5
ENSMUSG00000098651	10.4777	-1.891	0.388053	-4.87305	1.09889e-06	8.17698e-06	Mir6999
ENSMUSG00000026470	2568.58	-0.982897	0.201741	-4.87207	1.10432e-06	8.20994e-06	Stx6
ENSMUSG00000025735	24.3857	-1.07812	0.221344	-4.87079	1.11151e-06	8.25838e-06	Rhbdl1
ENSMUSG00000020303	61.2443	-1.69161	0.347307	-4.87065	1.1123e-06	8.26045e-06	Stc2
ENSMUSG00000021792	208.503	-2.73073	0.56085	-4.86891	1.12214e-06	8.32477e-06	Fam213a
ENSMUSG00000067219	46.7817	-1.5628	0.321084	-4.86727	1.1315e-06	8.39167e-06	Nipal1
ENSMUSG00000018919	25.6389	-3.09863	0.636796	-4.86597	1.13894e-06	8.43924e-06	Tm4sf5
ENSMUSG00000018076	1655.7	-1.18637	0.243835	-4.86547	1.14183e-06	8.45804e-06	Med13l
ENSMUSG00000026765	95.8935	-2.26653	0.465887	-4.86498	1.14469e-06	8.47668e-06	Lypd6b
ENSMUSG00000029428	336.861	-0.579041	0.119066	-4.86321	1.15495e-06	8.54756e-06	Stx2
ENSMUSG00000039620	8.88351	-2.68867	0.552897	-4.86289	1.15687e-06	8.55915e-06	6430573F11Rik
ENSMUSG00000050555	271.476	-0.861679	0.177304	-4.8599	1.17444e-06	8.68135e-06	Hyls1
ENSMUSG00000069114	37.7596	-2.0786	0.428069	-4.85576	1.19926e-06	8.84616e-06	Zbtb10
ENSMUSG00000108621	97.8708	-1.61024	0.331621	-4.85565	1.19995e-06	8.84862e-06	Gm37494
ENSMUSG00000037110	834.595	-1.11764	0.230196	-4.85516	1.20287e-06	8.86483e-06	Ralgapa2
ENSMUSG00000022602	225.557	-1.60466	0.330535	-4.85472	1.20555e-06	8.87922e-06	Arc
ENSMUSG00000038457	9.33705	-1.33634	0.275263	-4.85476	1.20531e-06	8.87922e-06	Tmem255b
ENSMUSG00000039835	616.799	-2.7337	0.563145	-4.85435	1.20783e-06	8.89336e-06	Nhsl1
ENSMUSG00000048546	1427.64	-0.970104	0.19985	-4.85415	1.20903e-06	8.89954e-06	Tob2
ENSMUSG00000002325	432.102	-1.0561	0.217606	-4.85324	1.21459e-06	8.93513e-06	Irf9
ENSMUSG00000097697	3.35208	-3.12715	0.644368	-4.85305	1.21577e-06	8.94108e-06	4833412C05Rik
ENSMUSG00000029167	14.3658	-3.52193	0.725805	-4.85245	1.21947e-06	8.96252e-06	Ppargc1a
ENSMUSG00000018554	9.12748	-3.12782	0.644594	-4.85238	1.21989e-06	8.96252e-06	Ybx2
ENSMUSG00000037318	2427.66	-1.11057	0.228888	-4.85205	1.22191e-06	8.97017e-06	Traf3ip3
ENSMUSG00000022884	4578.76	-0.655656	0.135164	-4.85083	1.22944e-06	9.02002e-06	Eif4a2
ENSMUSG00000066090	49.1285	-2.78062	0.57328	-4.85037	1.23233e-06	9.03587e-06	Insl5
ENSMUSG00000043257	264.632	-0.67417	0.138996	-4.85028	1.23286e-06	9.03702e-06	Pigv
ENSMUSG00000054626	18.3707	-2.92791	0.603911	-4.84825	1.24557e-06	9.12476e-06	Xlr
ENSMUSG00000016206	256.897	-0.635986	0.131186	-4.84795	1.24743e-06	9.13293e-06	H2-M3
ENSMUSG00000052423	481.22	-0.555224	0.114526	-4.848	1.24714e-06	9.13293e-06	B4galt3
ENSMUSG00000074682	16.5268	-1.57708	0.325466	-4.84559	1.26235e-06	9.23393e-06	Zcchc3
ENSMUSG00000042496	412.504	-0.814177	0.168123	-4.84274	1.28063e-06	9.36205e-06	Prdm10
ENSMUSG00000034785	77.0392	-3.50086	0.723015	-4.84203	1.28519e-06	9.38982e-06	Dio1
ENSMUSG00000033022	548.901	-3.24703	0.670682	-4.84138	1.28939e-06	9.41769e-06	Cdo1
ENSMUSG00000048897	490.235	-0.574401	0.118662	-4.84064	1.2942e-06	9.45003e-06	Zfp710
ENSMUSG00000050912	2921.34	-0.895379	0.185087	-4.83762	1.31404e-06	9.58923e-06	Tmem123
ENSMUSG00000029178	1417.96	-1.47398	0.304714	-4.83724	1.31651e-06	9.60156e-06	Klf3
ENSMUSG00000042608	907.608	-0.882893	0.182541	-4.83668	1.32024e-06	9.6259e-06	Stk40
ENSMUSG00000098206	179.547	-1.67052	0.34561	-4.83354	1.34128e-06	9.7764e-06	A430106G13Rik
ENSMUSG00000072601	6.32191	-2.4081	0.498264	-4.83298	1.34504e-06	9.8009e-06	Ear1
ENSMUSG00000028544	1882.55	-1.79563	0.371583	-4.83238	1.34911e-06	9.82475e-06	Slc5a9
ENSMUSG00000029636	12.8459	-2.13468	0.441889	-4.83081	1.35981e-06	9.89973e-06	Wasf3
ENSMUSG00000065434	20.8989	-1.02806	0.212995	-4.82666	1.38839e-06	1.00898e-05	Mir7-1
ENSMUSG00000112670	4.79953	-1.95439	0.405026	-4.82536	1.39754e-06	1.01533e-05	AC158593,1
ENSMUSG00000074264	87.4618	-3.44163	0.713676	-4.8224	1.4184e-06	1.03019e-05	Amy1
ENSMUSG00000028364	936.275	-2.59616	0.538539	-4.82075	1.43022e-06	1.03785e-05	Tnc
ENSMUSG00000028294	5.63022	-3.33268	0.69137	-4.8204	1.43274e-06	1.03937e-05	Cfap206
ENSMUSG00000076917	7.50699	-3.36458	0.698063	-4.81987	1.4365e-06	1.04117e-05	Traj12
ENSMUSG00000004668	9.93226	-2.7092	0.562157	-4.81929	1.4407e-06	1.04391e-05	Abca13
ENSMUSG00000070802	103.59	-2.16642	0.449628	-4.81824	1.44829e-06	1.04879e-05	Pnmal2
ENSMUSG00000085965	4.16374	-2.51388	0.521802	-4.81769	1.45231e-06	1.05047e-05	2310016D23Rik
ENSMUSG00000050222	3.83374	-2.4576	0.510251	-4.81645	1.46133e-06	1.05668e-05	Il17d
ENSMUSG00000089987	3.12814	-2.7309	0.567716	-4.81033	1.50684e-06	1.08671e-05	Gpx2-ps1
ENSMUSG00000038876	971.759	-0.481201	0.100034	-4.81036	1.50662e-06	1.08671e-05	Rnf146
ENSMUSG00000090215	102.658	-1.16111	0.24141	-4.8097	1.51153e-06	1.08978e-05	Trim34b
ENSMUSG00000014177	464.727	-0.495844	0.103097	-4.80947	1.51331e-06	1.09074e-05	Tvp23b
ENSMUSG00000042041	7.40917	-4.5029	0.936388	-4.8088	1.51841e-06	1.09377e-05	2010003K11Rik
ENSMUSG00000050296	1.75252	-3.51613	0.73142	-4.80727	1.53007e-06	1.1012e-05	Abca12
ENSMUSG00000105216	2.15024	-3.38165	0.70361	-4.80614	1.53872e-06	1.1071e-05	Traj47
ENSMUSG00000053510	3316.98	-0.287875	0.0598999	-4.80594	1.54028e-06	1.10758e-05	Nrd1
ENSMUSG00000047187	1676.68	-0.36394	0.0757369	-4.80531	1.54509e-06	1.11071e-05	Rab2a
ENSMUSG00000063171	68.2905	-2.27394	0.473296	-4.80448	1.5515e-06	1.11467e-05	Rps4l
ENSMUSG00000024973	1.72599	-3.70747	0.771709	-4.80423	1.55344e-06	1.11574e-05	Hrasls5
ENSMUSG00000063931	664.107	-0.543778	0.11324	-4.80198	1.57105e-06	1.12772e-05	Pepd
ENSMUSG00000060601	1680.96	-0.421529	0.087795	-4.80129	1.57646e-06	1.13127e-05	Nr1h2
ENSMUSG00000042508	1386.58	-0.979426	0.20403	-4.80041	1.58339e-06	1.13526e-05	Dmtf1
ENSMUSG00000028525	456.926	-1.60975	0.335386	-4.79969	1.58912e-06	1.1387e-05	Pde4b
ENSMUSG00000022490	73.8614	-4.32347	0.900807	-4.79956	1.59015e-06	1.13904e-05	Ppp1r1a
ENSMUSG00000028483	567.523	-0.634881	0.13228	-4.79951	1.59052e-06	1.13904e-05	Snapc3
ENSMUSG00000074497	284.251	-1.47224	0.306773	-4.79913	1.59359e-06	1.14091e-05	A430078G23Rik
ENSMUSG00000021706	321.806	-0.868038	0.180878	-4.79902	1.59447e-06	1.1412e-05	Zfyve16
ENSMUSG00000048330	16.559	-1.99311	0.41535	-4.79863	1.59751e-06	1.14271e-05	Ric3
ENSMUSG00000001323	276.569	-0.920791	0.191885	-4.79866	1.59733e-06	1.14271e-05	Srr
ENSMUSG00000074155	1.14433	-3.88476	0.80964	-4.79814	1.60148e-06	1.14522e-05	Klk5
ENSMUSG00000047281	257.547	-1.56302	0.325854	-4.79668	1.61317e-06	1.1519e-05	Sfn
ENSMUSG00000028270	594.04	-1.38482	0.288898	-4.79347	1.63923e-06	1.16915e-05	Gbp2
ENSMUSG00000021978	1164.21	-0.789514	0.164767	-4.79171	1.65369e-06	1.17879e-05	Extl3
ENSMUSG00000027763	5489.08	-0.580927	0.121297	-4.78928	1.67381e-06	1.19208e-05	Mbnl1
ENSMUSG00000113035	100.384	-1.53191	0.319926	-4.78835	1.68162e-06	1.19661e-05	AC157822,3
ENSMUSG00000029121	27.23	-3.13717	0.655277	-4.78754	1.68834e-06	1.20105e-05	Crmp1
ENSMUSG00000085379	17.2308	-1.16956	0.244373	-4.78595	1.70179e-06	1.21026e-05	2310058D17Rik
ENSMUSG00000036833	841.942	-0.633117	0.132318	-4.78482	1.71137e-06	1.21672e-05	Pnpla7
ENSMUSG00000073102	44.9563	-3.24175	0.67772	-4.78332	1.72427e-06	1.22447e-05	Drc1
ENSMUSG00000103768	2.82904	-3.34472	0.699366	-4.7825	1.73128e-06	1.2291e-05	Gm37856
ENSMUSG00000028007	52.7704	-1.63911	0.342741	-4.78237	1.73241e-06	1.22955e-05	Snx7
ENSMUSG00000030703	2115.82	-1.71857	0.359414	-4.78159	1.73916e-06	1.23398e-05	Gdpd3
ENSMUSG00000022911	217.373	-1.10973	0.232166	-4.77988	1.75396e-06	1.24376e-05	Arl13b
ENSMUSG00000031438	44.7528	-1.69073	0.353734	-4.77966	1.7559e-06	1.24442e-05	Rnf128
ENSMUSG00000050445	2.45118	-2.75347	0.576157	-4.77902	1.76148e-06	1.24729e-05	Cyp8b1
ENSMUSG00000054720	955.32	-0.728727	0.152642	-4.77408	1.80533e-06	1.27504e-05	Lrrc8c
ENSMUSG00000024924	120.598	-1.89344	0.396736	-4.77255	1.8191e-06	1.28366e-05	Vldlr
ENSMUSG00000036353	61.1964	-0.997845	0.20913	-4.77141	1.8294e-06	1.28982e-05	P2ry12
ENSMUSG00000027665	1900.34	-0.838924	0.175845	-4.77081	1.83491e-06	1.29333e-05	Pik3ca
ENSMUSG00000028617	1578.33	-0.789336	0.165493	-4.76962	1.84578e-06	1.30024e-05	Lrrc42
ENSMUSG00000043230	4.03575	-2.28465	0.479118	-4.76845	1.85645e-06	1.30701e-05	Fam124b
ENSMUSG00000054136	4.7518	-2.26937	0.476039	-4.76719	1.86811e-06	1.31404e-05	Adm2
ENSMUSG00000102988	1.41125	-3.92452	0.824053	-4.76246	1.91246e-06	1.34298e-05	Trbv22
ENSMUSG00000086335	1.49669	-3.26263	0.685096	-4.7623	1.91399e-06	1.34367e-05	Gm12107
ENSMUSG00000069874	236.47	-1.10281	0.231678	-4.76011	1.93483e-06	1.35753e-05	Irgm2
ENSMUSG00000068876	33.9606	-2.34465	0.492686	-4.75891	1.94641e-06	1.36449e-05	Cgn
ENSMUSG00000032512	1575.28	-0.570212	0.119837	-4.75824	1.95284e-06	1.3686e-05	Wdr48
ENSMUSG00000071019	2.06988	-3.79123	0.796944	-4.75721	1.96287e-06	1.37524e-05	Sdr16c6
ENSMUSG00000021365	1166.73	-1.26506	0.265936	-4.75698	1.96506e-06	1.37638e-05	Nedd9
ENSMUSG00000102796	1.7817	-3.7931	0.797509	-4.75618	1.9729e-06	1.38069e-05	Gm37711
ENSMUSG00000081984	3.9602	-2.57834	0.542131	-4.75594	1.97522e-06	1.38192e-05	Dnajb3
ENSMUSG00000091326	1.52606	-3.52568	0.74153	-4.75461	1.98832e-06	1.3899e-05	Traj54
ENSMUSG00000096908	28.6251	-3.82413	0.804636	-4.75263	2.0079e-06	1.40279e-05	Trav7-3
ENSMUSG00000104392	3.57741	-2.47438	0.520787	-4.75122	2.0219e-06	1.41177e-05	Gm37962
ENSMUSG00000058056	250.946	-1.65595	0.348557	-4.75088	2.02529e-06	1.41374e-05	Palld
ENSMUSG00000101995	1.03316	-3.73791	0.786846	-4.7505	2.02913e-06	1.41601e-05	Gm29480
ENSMUSG00000003949	30.1851	-2.52429	0.531765	-4.747	2.06451e-06	1.43948e-05	Hlf
ENSMUSG00000085207	16.67	-1.68539	0.35504	-4.74704	2.06413e-06	1.43948e-05	Gm11767
ENSMUSG00000030325	5.06944	-1.69779	0.357811	-4.74494	2.08568e-06	1.45382e-05	Klrb1c
ENSMUSG00000025324	743.759	-1.77422	0.373932	-4.74477	2.08747e-06	1.45466e-05	Atp10a
ENSMUSG00000026269	2166.13	-0.773408	0.163041	-4.74363	2.09921e-06	1.46242e-05	Rnpepl1
ENSMUSG00000026567	8.18913	-3.91617	0.825654	-4.74312	2.10455e-06	1.46573e-05	Adcy10
ENSMUSG00000017765	745.002	-0.547804	0.115534	-4.7415	2.12147e-06	1.47709e-05	Slc12a4
ENSMUSG00000097386	2.07581	-3.32241	0.700927	-4.74002	2.13698e-06	1.48537e-05	9130213A22Rik
ENSMUSG00000109880	1.43026	-3.2136	0.678013	-4.73974	2.13996e-06	1.48702e-05	Gm34096
ENSMUSG00000107152	58.1433	-3.05886	0.645477	-4.73892	2.14863e-06	1.4922e-05	Gm43152
ENSMUSG00000026721	1342.84	-1.01216	0.213648	-4.73752	2.16349e-06	1.50083e-05	Rabgap1l
ENSMUSG00000024578	2.78963	-3.54948	0.749271	-4.73724	2.16644e-06	1.50202e-05	Il17b
ENSMUSG00000040405	19.8073	-3.39541	0.716748	-4.73725	2.16637e-06	1.50202e-05	Havcr1
ENSMUSG00000033488	76.8813	-1.50309	0.317304	-4.73705	2.16847e-06	1.50294e-05	BC026585
ENSMUSG00000022103	69.6822	-1.93806	0.409185	-4.7364	2.17548e-06	1.50633e-05	Gfra2
ENSMUSG00000034254	1119.42	-0.653868	0.138078	-4.73549	2.18526e-06	1.51124e-05	Agpat1
ENSMUSG00000002475	14.3764	-2.56051	0.540819	-4.7345	2.19596e-06	1.51735e-05	Abhd3
ENSMUSG00000041737	210.183	-4.28506	0.905283	-4.73339	2.20802e-06	1.52476e-05	Tmem45b
ENSMUSG00000023274	8459.41	-2.04866	0.432875	-4.73269	2.21563e-06	1.5288e-05	Cd4
ENSMUSG00000044927	83.7446	-2.61811	0.553211	-4.73256	2.21703e-06	1.52933e-05	H1fx
ENSMUSG00000002565	98.1406	-3.18796	0.673687	-4.73211	2.22201e-06	1.53234e-05	Scin
ENSMUSG00000094023	23.3777	-3.98988	0.843245	-4.73158	2.22779e-06	1.53577e-05	Trav7d-4
ENSMUSG00000075376	954.559	-0.763577	0.1614	-4.73096	2.23458e-06	1.53971e-05	Rc3h2
ENSMUSG00000096573	1.4122	-3.42447	0.724257	-4.72826	2.26453e-06	1.55947e-05	1700009J07Rik
ENSMUSG00000026094	2004.67	-1.33659	0.282803	-4.72622	2.2874e-06	1.5739e-05	Stk17b
ENSMUSG00000028821	1831.63	-0.432022	0.0914241	-4.72547	2.29582e-06	1.57881e-05	Syf2
ENSMUSG00000107133	1.19662	-3.92995	0.831663	-4.72541	2.29655e-06	1.57887e-05	Gm42787
ENSMUSG00000019907	1892.47	-0.697436	0.147596	-4.72532	2.29751e-06	1.57909e-05	Ppp1r12a
ENSMUSG00000109279	9.44238	-1.41698	0.300004	-4.7232	2.32161e-06	1.59254e-05	Gm45220
ENSMUSG00000031536	596.428	-0.644852	0.136583	-4.72131	2.34332e-06	1.60698e-05	Polb
ENSMUSG00000017607	69.8037	-2.14353	0.454278	-4.71854	2.37539e-06	1.6267e-05	Tns4
ENSMUSG00000042251	53.9005	-3.09402	0.656464	-4.71317	2.43896e-06	1.66652e-05	Pm20d1
ENSMUSG00000026211	81.1456	-1.77458	0.376536	-4.7129	2.44218e-06	1.66826e-05	Obsl1
ENSMUSG00000042340	33.0455	-2.04978	0.434966	-4.7125	2.44693e-06	1.67104e-05	Ctf1
ENSMUSG00000018830	244.367	-2.12631	0.451338	-4.71113	2.4635e-06	1.6808e-05	Myh11
ENSMUSG00000021585	1530.15	-0.861848	0.182969	-4.71034	2.47301e-06	1.68604e-05	Cast
ENSMUSG00000048970	267.79	-0.614396	0.130434	-4.71039	2.47244e-06	1.68604e-05	C1galt1c1
ENSMUSG00000061959	1.11067	-3.56415	0.756924	-4.70874	2.49258e-06	1.69749e-05	Ces1e
ENSMUSG00000050930	25.2904	-2.04923	0.435215	-4.70855	2.49483e-06	1.69856e-05	Map10
ENSMUSG00000048012	59.4626	-1.43486	0.304762	-4.70815	2.4998e-06	1.70147e-05	Zfp473
ENSMUSG00000032232	174.245	-2.3098	0.490908	-4.70515	2.53678e-06	1.72473e-05	Cgnl1
ENSMUSG00000041328	1831.57	-0.731314	0.15546	-4.7042	2.54861e-06	1.73182e-05	Pcf11
ENSMUSG00000004896	527.313	-0.441276	0.0938087	-4.70399	2.55123e-06	1.73311e-05	Rrnad1
ENSMUSG00000048787	249.446	-0.809119	0.172019	-4.70366	2.55541e-06	1.73548e-05	Dcun1d3
ENSMUSG00000104197	4.60003	-1.727	0.367196	-4.7032	2.56117e-06	1.73843e-05	Gm37632
ENSMUSG00000105380	3.13746	-3.32649	0.707478	-4.7019	2.57748e-06	1.74853e-05	Trav12-4
ENSMUSG00000024410	1095.44	-0.373283	0.079415	-4.70041	2.59638e-06	1.75941e-05	3110002H16Rik
ENSMUSG00000030513	132.107	-2.49269	0.530743	-4.69661	2.64516e-06	1.78803e-05	Pcsk6
ENSMUSG00000042514	2.73066	-3.06511	0.652782	-4.69546	2.66009e-06	1.79615e-05	Klhl14
ENSMUSG00000018427	625.744	-1.06814	0.227513	-4.69487	2.66777e-06	1.80034e-05	Ypel2
ENSMUSG00000022146	165.06	-0.863182	0.183883	-4.69419	2.6767e-06	1.80538e-05	Osmr
ENSMUSG00000023805	209.162	-2.05605	0.438106	-4.69304	2.69179e-06	1.81506e-05	Synj2
ENSMUSG00000035851	1846.36	-0.646673	0.137802	-4.69277	2.69534e-06	1.81695e-05	Ythdc1
ENSMUSG00000092470	6.04446	-1.67837	0.357666	-4.69255	2.69816e-06	1.81835e-05	Gm20518
ENSMUSG00000073888	80.5347	-1.68755	0.359724	-4.69124	2.71549e-06	1.82853e-05	Ccl27a
ENSMUSG00000050600	96.9977	-2.40027	0.511688	-4.69089	2.72016e-06	1.83017e-05	Zfp831
ENSMUSG00000052534	140.066	-1.75542	0.374229	-4.69075	2.72203e-06	1.83093e-05	Pbx1
ENSMUSG00000028976	34.3035	-4.32528	0.922232	-4.69001	2.73192e-06	1.83644e-05	Slc2a5
ENSMUSG00000076920	1.55784	-3.36588	0.717665	-4.69005	2.73141e-06	1.83644e-05	Traj8
ENSMUSG00000039485	766.541	-1.34278	0.28631	-4.68997	2.73247e-06	1.83644e-05	Tspyl4
ENSMUSG00000030275	4232.04	-0.815339	0.173889	-4.68884	2.74753e-06	1.84606e-05	Etnk1
ENSMUSG00000070873	32.8142	-1.384	0.295192	-4.68847	2.7525e-06	1.84889e-05	Lilra5
ENSMUSG00000040525	7.51101	-2.59144	0.552755	-4.68822	2.75589e-06	1.85066e-05	Cblc
ENSMUSG00000096678	21.4889	-3.15841	0.673742	-4.68786	2.76078e-06	1.85265e-05	Trav9-4
ENSMUSG00000068551	125.194	-1.74839	0.373178	-4.68514	2.79762e-06	1.87408e-05	Zfp467
ENSMUSG00000057706	388.779	-1.41532	0.302357	-4.68096	2.85533e-06	1.90961e-05	Mex3b
ENSMUSG00000098404	38.5046	-1.42747	0.304965	-4.68076	2.85817e-06	1.91047e-05	Mrip-ps
ENSMUSG00000028278	344.589	-1.78441	0.381244	-4.68048	2.86203e-06	1.91253e-05	Rragd
ENSMUSG00000020166	3625.11	-0.617097	0.131847	-4.6804	2.86316e-06	1.91277e-05	Cnot2
ENSMUSG00000038520	821.561	-0.595914	0.127401	-4.67748	2.90429e-06	1.93866e-05	Tbc1d17
ENSMUSG00000056445	6.04016	-1.85554	0.396713	-4.67728	2.90698e-06	1.93941e-05	Hoxaas2
ENSMUSG00000036099	428.699	-0.58463	0.125004	-4.67687	2.91281e-06	1.94277e-05	Vezt
ENSMUSG00000029436	50.9327	-1.30464	0.279159	-4.67345	2.96185e-06	1.97173e-05	Mmp17
ENSMUSG00000059493	8.47919	-1.78715	0.382418	-4.67329	2.96409e-06	1.97224e-05	Nhs
ENSMUSG00000036503	605.367	-1.13048	0.241905	-4.67323	2.96495e-06	1.97224e-05	Rnf13
ENSMUSG00000070808	709.148	-0.956081	0.204587	-4.67323	2.96501e-06	1.97224e-05	Bicra
ENSMUSG00000019850	1379.46	-1.15677	0.247554	-4.67281	2.97102e-06	1.9757e-05	Tnfaip3
ENSMUSG00000049241	80.7659	-3.24571	0.695248	-4.66843	3.03515e-06	2.01562e-05	Hcar1
ENSMUSG00000049800	583.823	-1.03855	0.222507	-4.6675	3.04889e-06	2.02419e-05	Sertad2
ENSMUSG00000020827	1592.11	-0.68485	0.146748	-4.66684	3.05864e-06	2.03012e-05	Mink1
ENSMUSG00000028517	332.554	-1.35319	0.290032	-4.66565	3.07638e-06	2.04079e-05	Plpp3
ENSMUSG00000035382	1002.89	-0.546226	0.117107	-4.66434	3.09616e-06	2.0528e-05	Pcsk7
ENSMUSG00000032318	6.04805	-3.03731	0.651209	-4.6641	3.09972e-06	2.05461e-05	Isl2
ENSMUSG00000035051	791.576	-0.6553	0.14052	-4.66339	3.11045e-06	2.06061e-05	Dhx57
ENSMUSG00000028822	1655.39	-0.545013	0.116883	-4.6629	3.11792e-06	2.06389e-05	Tmem50a
ENSMUSG00000055733	3.33201	-2.78302	0.59688	-4.66262	3.12214e-06	2.06557e-05	Nap1l3
ENSMUSG00000054400	183.184	-0.76657	0.164419	-4.66229	3.12714e-06	2.06832e-05	Cklf
ENSMUSG00000026413	296.439	-4.43615	0.952116	-4.65925	3.17359e-06	2.09848e-05	Pkp1
ENSMUSG00000062081	53.5145	-0.832038	0.1786	-4.65867	3.18254e-06	2.1027e-05	Gm6055
ENSMUSG00000060429	23.2153	-3.06234	0.657388	-4.65834	3.18771e-06	2.10536e-05	Sntb1
ENSMUSG00000031709	169.11	-1.61561	0.346823	-4.6583	3.18828e-06	2.10536e-05	Tbc1d9
ENSMUSG00000019877	1691.74	-0.894235	0.192028	-4.65679	3.21184e-06	2.12035e-05	Serinc1
ENSMUSG00000033610	201.798	-3.14038	0.674479	-4.65601	3.22395e-06	2.12777e-05	Pank1
ENSMUSG00000041460	156.714	-1.34985	0.289928	-4.65581	3.22707e-06	2.12926e-05	Cacna2d4
ENSMUSG00000058325	195.407	-1.45485	0.312538	-4.65496	3.24043e-06	2.13578e-05	Dock1
ENSMUSG00000029776	2614.81	-0.936752	0.201279	-4.654	3.25554e-06	2.14459e-05	Hibadh
ENSMUSG00000019039	921.977	-0.586047	0.125927	-4.65387	3.25755e-06	2.14476e-05	Dalrd3
ENSMUSG00000097804	5.63522	-2.70942	0.582311	-4.65287	3.27348e-06	2.1541e-05	Gm16685
ENSMUSG00000040592	294.434	-1.88568	0.405271	-4.65288	3.27337e-06	2.1541e-05	Cd79b
ENSMUSG00000039523	780.86	-0.464908	0.0999993	-4.64912	3.33361e-06	2.19073e-05	Cep104
ENSMUSG00000035725	522.864	-1.13795	0.244818	-4.64817	3.3489e-06	2.19843e-05	Prkx
ENSMUSG00000066415	2365.93	-0.710212	0.152811	-4.64765	3.35744e-06	2.20345e-05	Msl2
ENSMUSG00000068606	8.6957	-2.62975	0.565856	-4.64739	3.36162e-06	2.2056e-05	Gm4841
ENSMUSG00000027761	1.87899	-4.12431	0.887549	-4.64686	3.37033e-06	2.21072e-05	Aadac
ENSMUSG00000102329	22.9963	-2.94777	0.634601	-4.64509	3.39936e-06	2.22732e-05	Gm10851
ENSMUSG00000040651	1057.09	-0.990575	0.21337	-4.64253	3.44164e-06	2.25389e-05	Fam208a
ENSMUSG00000053263	15.0292	-1.14222	0.246073	-4.64179	3.454e-06	2.26078e-05	Gm12592
ENSMUSG00000026640	113.617	-1.61271	0.347454	-4.64149	3.45903e-06	2.26347e-05	Plxna2
ENSMUSG00000097806	2.11946	-2.90307	0.625946	-4.63789	3.51988e-06	2.30145e-05	Gm6556
ENSMUSG00000076746	1.03969	-3.4862	0.751887	-4.63659	3.54196e-06	2.31342e-05	Tcrg-V6
ENSMUSG00000043671	490.692	-0.883589	0.190581	-4.63628	3.54729e-06	2.3163e-05	Dpy19l3
ENSMUSG00000044364	2.67265	-3.49613	0.754183	-4.63565	3.55826e-06	2.32284e-05	Tmem74b
ENSMUSG00000020423	7570.89	-1.45992	0.31496	-4.63525	3.56515e-06	2.3261e-05	Btg2
ENSMUSG00000028126	971.818	-0.502356	0.108377	-4.63526	3.56485e-06	2.3261e-05	Pip5k1a
ENSMUSG00000086184	23.3438	-1.94553	0.420142	-4.63065	3.64524e-06	2.37521e-05	Gm12764
ENSMUSG00000032261	84.5434	-1.36898	0.29587	-4.62695	3.71095e-06	2.41418e-05	Sh3bgrl2
ENSMUSG00000028419	1312.64	-0.55194	0.119318	-4.6258	3.73153e-06	2.42628e-05	Chmp5
ENSMUSG00000024121	190.278	-0.502639	0.108669	-4.62543	3.73827e-06	2.43002e-05	Atp6v0c
ENSMUSG00000023903	27.6666	-3.22899	0.698326	-4.6239	3.76591e-06	2.44669e-05	Mmp25
ENSMUSG00000050440	5.34569	-1.89402	0.409639	-4.62364	3.77064e-06	2.44912e-05	Hamp
[truncated: 2,380 more rows]

## Sheet: Table S2-DGE_UP
Table S2. Differential gene expression analysis, 4138 upregulated genes, Related to Figure 3.
	baseMean	log2FoldChange	lfcSE	stat	pvalue	padj	gene
ENSMUSG00000020279	1146.03	3.5571	0.163678	21.7323	1.01619e-104	6.24401e-101	Il9r
ENSMUSG00000008999	1050.48	2.90044	0.144986	20.0049	4.9938e-89	2.04563e-85	Bmp7
ENSMUSG00000034573	1418.9	2.75629	0.176722	15.5967	7.66092e-55	1.25527e-51	Ptpn13
ENSMUSG00000038141	469.279	1.06941	0.0690112	15.4962	3.67774e-54	5.64947e-51	Tmem181a
ENSMUSG00000052852	671.75	3.44152	0.240338	14.3195	1.65291e-46	1.93454e-43	Reep1
ENSMUSG00000051359	819.627	3.25605	0.227851	14.2903	2.51648e-46	2.68913e-43	Ncald
ENSMUSG00000031642	1049.05	2.27449	0.160535	14.1682	1.44049e-45	1.41618e-42	Sh3rf1
ENSMUSG00000051726	1078.94	5.47209	0.386742	14.1492	1.88937e-45	1.78604e-42	Kcnf1
ENSMUSG00000028664	864.028	2.66942	0.191063	13.9714	2.32956e-44	1.97434e-41	Ephb2
ENSMUSG00000025905	142.389	25.3149	1.8243	13.8765	8.79338e-44	6.97173e-41	Oprk1
ENSMUSG00000049553	1312.66	1.21122	0.0891934	13.5797	5.28449e-42	3.60784e-39	Polr1a
ENSMUSG00000027249	299.246	5.18646	0.3892	13.3259	1.63543e-40	1.00489e-37	F2
ENSMUSG00000034271	451.572	3.1415	0.244452	12.8512	8.47133e-38	4.52627e-35	Jdp2
ENSMUSG00000070337	157.043	3.09612	0.241479	12.8215	1.24266e-37	6.23307e-35	Gpr179
ENSMUSG00000025161	236.16	3.40552	0.266534	12.7771	2.20238e-37	1.06137e-34	Slc16a3
ENSMUSG00000041438	1219.74	1.15824	0.093038	12.4491	1.41378e-35	6.20497e-33	Utp4
ENSMUSG00000025786	1964.65	0.806155	0.0653648	12.3332	6.00395e-35	2.58886e-32	Zdhhc3
ENSMUSG00000018509	919.349	3.55175	0.288846	12.2964	9.47443e-35	3.88104e-32	Cenpv
ENSMUSG00000020182	496.33	6.1064	0.498102	12.2593	1.49731e-34	5.93562e-32	Ddc
ENSMUSG00000040209	2833.27	2.13537	0.174863	12.2117	2.69243e-34	1.03398e-31	Zfp704
ENSMUSG00000046213	1192.64	9.29856	0.766561	12.1302	7.30438e-34	2.6401e-31	Cym
ENSMUSG00000032373	249.7	2.5376	0.209898	12.0897	1.19706e-33	4.14384e-31	Car12
ENSMUSG00000024785	842.376	1.3693	0.114322	11.9776	4.65709e-33	1.50608e-30	Rcl1
ENSMUSG00000023944	50773	1.31462	0.110751	11.87	1.69389e-32	5.20406e-30	Hsp90ab1
ENSMUSG00000041831	1429.43	4.5284	0.387454	11.6876	1.47501e-31	4.3158e-29	Sytl3
ENSMUSG00000022390	2808.58	1.08116	0.0926149	11.6737	1.73722e-31	4.90774e-29	Zc3h7b
ENSMUSG00000030505	910.426	1.29482	0.111849	11.5765	5.42069e-31	1.44815e-28	Prmt3
ENSMUSG00000048965	578.44	2.13629	0.185053	11.5442	7.89774e-31	2.06501e-28	Mrgpre
ENSMUSG00000036466	92.85	5.83008	0.507557	11.4865	1.54163e-30	3.94689e-28	Megf11
ENSMUSG00000031383	161.675	5.09052	0.443535	11.4771	1.71866e-30	4.35478e-28	Dusp9
ENSMUSG00000040820	642.525	1.89388	0.165667	11.4319	2.89712e-30	7.19246e-28	Hlcs
ENSMUSG00000043969	372.13	8.28663	0.725268	11.4256	3.11447e-30	7.65475e-28	Emx2
ENSMUSG00000039115	1498.33	3.82418	0.334758	11.4237	3.18339e-30	7.74668e-28	Itga9
ENSMUSG00000035378	312.78	1.4185	0.124355	11.4069	3.86399e-30	9.3107e-28	Shq1
ENSMUSG00000075410	171.489	6.08067	0.535538	11.3543	7.05772e-30	1.63646e-27	Prcd
ENSMUSG00000053166	320.627	6.5025	0.574018	11.328	9.53243e-30	2.18961e-27	Cdh22
ENSMUSG00000029401	798.571	1.3726	0.121374	11.3088	1.18654e-29	2.67549e-27	Rilpl2
ENSMUSG00000030170	609.382	2.53502	0.226539	11.1903	4.55124e-29	9.98753e-27	Wnt5b
ENSMUSG00000030638	1287.12	3.10772	0.279856	11.1047	1.18995e-28	2.54318e-26	Sh3gl3
ENSMUSG00000097888	97.1961	4.34206	0.392833	11.0532	2.11564e-28	4.44429e-26	Gm26682
ENSMUSG00000013629	2617.5	1.65086	0.151601	10.8895	1.29319e-27	2.50268e-25	Cad
ENSMUSG00000032415	131.315	2.1872	0.201406	10.8596	1.79436e-27	3.41874e-25	Ube2cbp
ENSMUSG00000114184	755.647	1.35332	0.124886	10.8364	2.31432e-27	4.37548e-25	AC122367,3
ENSMUSG00000111290	136.775	6.15122	0.570254	10.7868	3.97342e-27	7.39838e-25	AC160562,2
ENSMUSG00000020108	5123.25	2.04519	0.191794	10.6635	1.50863e-26	2.68689e-24	Ddit4
ENSMUSG00000057191	682.964	1.36024	0.130022	10.4616	1.29599e-25	2.19676e-23	AB124611
ENSMUSG00000040536	903.715	6.15807	0.591084	10.4183	2.04673e-25	3.42208e-23	Necab1
ENSMUSG00000113536	79.9578	3.43714	0.331974	10.3537	4.02793e-25	6.47049e-23	CT030170,4
ENSMUSG00000040463	4520.1	1.42427	0.137996	10.3212	5.65418e-25	8.74015e-23	Mybbp1a
ENSMUSG00000030839	191.412	0.937983	0.0909555	10.3125	6.18427e-25	9.46631e-23	Sergef
ENSMUSG00000018341	1139.16	2.67459	0.25936	10.3123	6.20098e-25	9.46631e-23	Il12rb2
ENSMUSG00000067206	76.745	5.71988	0.558265	10.2458	1.23569e-24	1.84065e-22	Lrrc66
ENSMUSG00000111377	27.2966	4.09283	0.400611	10.2165	1.67292e-24	2.4621e-22	AC153536,2
ENSMUSG00000025027	1124.71	0.785214	0.076873	10.2144	1.70898e-24	2.50019e-22	Xpnpep1
ENSMUSG00000069805	841.074	5.38821	0.528112	10.2028	1.92681e-24	2.78571e-22	Fbp1
ENSMUSG00000035049	556.403	1.39229	0.136719	10.1836	2.34722e-24	3.35407e-22	Rrp12
ENSMUSG00000015027	528.304	1.68255	0.165805	10.1478	3.38941e-24	4.78764e-22	Galns
ENSMUSG00000041654	607.181	1.60272	0.158309	10.124	4.32468e-24	6.03931e-22	Slc39a11
ENSMUSG00000047361	187.588	5.26028	0.521169	10.0932	5.91868e-24	8.2186e-22	Gm973
ENSMUSG00000037375	259.843	3.09917	0.307302	10.0851	6.43052e-24	8.87917e-22	Hhat
ENSMUSG00000026604	2686.57	2.62187	0.260117	10.0796	6.80285e-24	9.34081e-22	Ptpn14
ENSMUSG00000027849	188.042	8.40725	0.83471	10.0721	7.34276e-24	1.00261e-21	Syt6
ENSMUSG00000022283	25605	1.48397	0.147938	10.031	1.11373e-23	1.50402e-21	Pabpc1
ENSMUSG00000036158	1025.35	1.93301	0.193189	10.0058	1.4377e-23	1.92043e-21	Prickle1
ENSMUSG00000015970	4572	2.07643	0.208313	9.96784	2.10765e-23	2.80009e-21	Chdh
ENSMUSG00000095427	655.394	1.43735	0.14436	9.95665	2.35879e-23	3.1169e-21	Rps2-ps6
ENSMUSG00000092074	171.074	1.69449	0.170623	9.93117	3.04672e-23	3.87991e-21	Dynlt1a
ENSMUSG00000009654	75.4645	5.9433	0.599892	9.90729	3.87017e-23	4.85312e-21	Oit3
ENSMUSG00000058287	426.37	4.88541	0.493449	9.90054	4.14048e-23	5.13963e-21	Gm12253
ENSMUSG00000036030	70.3333	4.22951	0.428786	9.86392	5.96732e-23	7.26064e-21	Prtg
ENSMUSG00000063696	11743.5	1.20289	0.122104	9.85133	6.76414e-23	8.14946e-21	Gm8730
ENSMUSG00000030045	644.585	0.725124	0.0740228	9.79596	1.17184e-22	1.3715e-20	Mrpl19
ENSMUSG00000050382	356.741	1.10072	0.112745	9.7629	1.62447e-22	1.88331e-20	Kif7
ENSMUSG00000026435	326.64	3.16207	0.324414	9.74702	1.8996e-22	2.19195e-20	Slc45a3
ENSMUSG00000019996	470.899	2.79363	0.287612	9.71318	2.64942e-22	2.95989e-20	Map7
ENSMUSG00000027408	398.531	3.069	0.315998	9.71209	2.67795e-22	2.97822e-20	Cpxm1
ENSMUSG00000029082	1272.91	4.35962	0.452227	9.64033	5.40118e-22	5.90001e-20	Bst1
ENSMUSG00000002319	908.651	1.31446	0.136603	9.6225	6.4252e-22	6.95676e-20	Ipo4
ENSMUSG00000020472	1021.56	0.989336	0.102866	9.61776	6.72802e-22	7.25269e-20	Zkscan17
ENSMUSG00000054362	28.3032	4.07454	0.423974	9.61037	7.22859e-22	7.75826e-20	Lexm
ENSMUSG00000062110	351.26	1.10477	0.11498	9.60836	7.37127e-22	7.8429e-20	Scfd2
ENSMUSG00000049154	122.135	4.07368	0.427315	9.53322	1.52486e-21	1.6085e-19	Fam183b
ENSMUSG00000026547	4195.47	1.41557	0.148952	9.50357	2.02819e-21	2.13029e-19	Tagln2
ENSMUSG00000031657	1251.39	1.0971	0.115483	9.50006	2.09772e-21	2.18465e-19	Heatr3
ENSMUSG00000032381	1294.79	0.866398	0.0915396	9.46474	2.94286e-21	3.02634e-19	Fam96a
ENSMUSG00000029507	678.197	1.50553	0.159357	9.44754	3.46901e-21	3.55256e-19	Pus1
ENSMUSG00000026874	131.646	5.22313	0.55573	9.39868	5.52519e-21	5.52025e-19	Hc
ENSMUSG00000026603	1130.51	1.94123	0.206709	9.39113	5.93593e-21	5.85917e-19	Smyd2
ENSMUSG00000024905	44.075	3.58885	0.382124	9.39185	5.89559e-21	5.85917e-19	Tesmin
ENSMUSG00000020658	313.683	3.09022	0.330066	9.36242	7.79338e-21	7.60102e-19	Efr3b
ENSMUSG00000022440	330.814	3.23116	0.345181	9.36076	7.91637e-21	7.69045e-19	C1qtnf6
ENSMUSG00000058046	49.852	2.7287	0.291696	9.3546	8.39181e-21	8.056e-19	4933430I17Rik
ENSMUSG00000020265	2802.86	1.22796	0.131409	9.34454	9.22873e-21	8.79162e-19	Sumo3
ENSMUSG00000039963	170.95	2.75891	0.297671	9.2683	1.89132e-20	1.76079e-18	Ccdc40
ENSMUSG00000024579	125.067	2.59995	0.280595	9.26585	1.9353e-20	1.79493e-18	Pcyox1l
ENSMUSG00000040877	954.751	4.41393	0.479603	9.20329	3.47146e-20	3.17181e-18	Wdr25
ENSMUSG00000101502	1540.91	1.00463	0.109187	9.20105	3.54467e-20	3.22628e-18	Rpl7a-ps10
ENSMUSG00000067274	22019.7	1.29247	0.140476	9.20067	3.55733e-20	3.22628e-18	Rplp0
ENSMUSG00000084333	1021.54	1.35501	0.147399	9.1928	3.82738e-20	3.45843e-18	Gm11599
ENSMUSG00000045817	6230.26	2.1423	0.233164	9.18795	4.00401e-20	3.60478e-18	Zfp36l2
ENSMUSG00000033949	118.549	2.78498	0.303713	9.16976	4.7408e-20	4.25253e-18	Trim36
ENSMUSG00000047592	48.8684	3.879	0.423077	9.16855	4.79435e-20	4.28493e-18	Nxpe5
ENSMUSG00000037907	532.687	1.83099	0.199852	9.16171	5.10818e-20	4.53245e-18	Ankrd13b
ENSMUSG00000024222	23260.6	2.13015	0.232952	9.14414	6.01084e-20	5.27623e-18	Fkbp5
ENSMUSG00000087095	43.3627	8.72899	0.958911	9.10303	8.78483e-20	7.65651e-18	Emx2os
ENSMUSG00000079442	603.072	1.45193	0.159665	9.09359	9.58243e-20	8.29285e-18	St6galnac4
ENSMUSG00000028138	2588.64	0.742921	0.0817785	9.08456	1.04123e-19	8.97939e-18	Adh5
ENSMUSG00000032294	14769.5	1.36732	0.15077	9.06892	1.20208e-19	1.02585e-17	Pkm
ENSMUSG00000037376	884.54	1.3793	0.152182	9.06345	1.26389e-19	1.07117e-17	Trmt6
ENSMUSG00000096687	261.421	1.05586	0.116716	9.04648	1.47654e-19	1.24282e-17	Mfsd4b4
ENSMUSG00000031672	2717.83	1.10756	0.122535	9.03872	1.58518e-19	1.3207e-17	Got2
ENSMUSG00000098708	179.753	2.67513	0.29619	9.03179	1.68882e-19	1.40229e-17	Gm27252
ENSMUSG00000023045	183.766	4.51859	0.500501	9.02814	1.74622e-19	1.44022e-17	Soat2
ENSMUSG00000056131	262.894	0.874175	0.0971224	9.00076	2.2416e-19	1.83037e-17	Pgm3
ENSMUSG00000044026	418.515	1.43987	0.160078	8.99483	2.36592e-19	1.91913e-17	Slc35g1
ENSMUSG00000020547	4397.05	1.38754	0.154859	8.96007	3.24462e-19	2.56419e-17	Bzw2
ENSMUSG00000058655	12220.6	0.934088	0.104827	8.91078	5.06766e-19	3.92911e-17	Eif4b
ENSMUSG00000042942	155.34	2.94156	0.330362	8.90406	5.38419e-19	4.14836e-17	Greb1l
ENSMUSG00000032185	1233.56	1.08811	0.122322	8.89545	5.81854e-19	4.45508e-17	Carm1
ENSMUSG00000027185	1134.76	1.08049	0.121698	8.87846	6.7792e-19	5.14257e-17	Nat10
ENSMUSG00000022439	7416.43	1.49522	0.168535	8.87189	7.19167e-19	5.42199e-17	Parvg
ENSMUSG00000038335	1664.34	1.16595	0.131693	8.8535	8.48138e-19	6.27878e-17	Tsr1
ENSMUSG00000060098	1678.97	1.89109	0.213656	8.85107	8.66852e-19	6.39804e-17	Prmt7
ENSMUSG00000005124	364.104	6.09704	0.689987	8.83645	9.88048e-19	7.16349e-17	Wisp1
ENSMUSG00000050846	215.995	0.884033	0.100067	8.83441	1.00627e-18	7.27412e-17	Zfp623
ENSMUSG00000022336	6859.01	1.15907	0.131391	8.8215	1.12941e-18	8.06935e-17	Eif3e
ENSMUSG00000020814	598.226	3.21336	0.364252	8.82179	1.12647e-18	8.06935e-17	Mxra7
ENSMUSG00000019987	212.232	5.31246	0.602625	8.81554	1.19113e-18	8.48566e-17	Arg1
ENSMUSG00000001305	721.773	1.31958	0.14973	8.81311	1.21726e-18	8.64679e-17	Rrp15
ENSMUSG00000022031	1548.24	0.768201	0.0872827	8.80129	1.35255e-18	9.49798e-17	Elp3
ENSMUSG00000057841	19876.8	1.58177	0.179791	8.79779	1.39533e-18	9.74274e-17	Rpl32
ENSMUSG00000032892	216.153	1.67987	0.190979	8.79611	1.41645e-18	9.8622e-17	Rangrf
ENSMUSG00000039021	96.3778	3.04243	0.346154	8.78923	1.50583e-18	1.04549e-16	Ttc16
ENSMUSG00000041605	776.072	4.04769	0.461697	8.76699	1.83505e-18	1.26336e-16	5730559C18Rik
ENSMUSG00000031320	32789	1.15155	0.131365	8.76599	1.85142e-18	1.27107e-16	Rps4x
ENSMUSG00000023132	3981.42	2.90022	0.33111	8.75909	1.96839e-18	1.34319e-16	Gzma
ENSMUSG00000028869	1446.38	0.864766	0.0987793	8.75452	2.04967e-18	1.38911e-16	Gnl2
ENSMUSG00000081210	751.008	1.23051	0.140558	8.75442	2.05162e-18	1.38911e-16	Gm12933
ENSMUSG00000040528	215.303	1.50565	0.172196	8.7438	2.25406e-18	1.50545e-16	Milr1
ENSMUSG00000023868	360.28	2.20185	0.251838	8.74312	2.26765e-18	1.51041e-16	Pde10a
ENSMUSG00000022191	1984.94	1.27519	0.145868	8.74206	2.28899e-18	1.52051e-16	Drosha
ENSMUSG00000049571	54.3012	4.42019	0.506786	8.72201	2.73316e-18	1.80096e-16	Cfap46
ENSMUSG00000015968	262.858	3.44849	0.396054	8.70712	3.11702e-18	2.0375e-16	Cacna1d
ENSMUSG00000030117	39.124	3.82212	0.439067	8.7051	3.17295e-18	2.06309e-16	Gdf3
ENSMUSG00000016503	1624.97	1.07882	0.124196	8.68641	3.74089e-18	2.41322e-16	Gtf3a
ENSMUSG00000058392	850.441	1.26007	0.145149	8.68127	3.91378e-18	2.51157e-16	Rrp1b
ENSMUSG00000041057	2492.35	1.05802	0.122145	8.66201	4.63515e-18	2.94374e-16	Wdr43
ENSMUSG00000000295	828.344	1.8365	0.212742	8.6325	6.00273e-18	3.77327e-16	Hddc2
ENSMUSG00000020549	984.759	0.909236	0.105679	8.60373	7.71678e-18	4.78947e-16	Elac2
ENSMUSG00000011254	532.831	1.04174	0.121532	8.57176	1.01916e-17	6.20021e-16	Thg1l
ENSMUSG00000020918	1869.47	1.17956	0.13784	8.55744	1.15403e-17	6.91801e-16	Kat2a
ENSMUSG00000044533	15737.6	1.47515	0.172625	8.54542	1.28072e-17	7.56672e-16	Rps2
ENSMUSG00000001506	2933.21	3.41962	0.400538	8.53756	1.37083e-17	8.06037e-16	Col1a1
ENSMUSG00000030268	727.707	1.94347	0.227673	8.53621	1.38695e-17	8.13568e-16	Bcat1
ENSMUSG00000031387	373.182	1.38563	0.162512	8.52635	1.51042e-17	8.8313e-16	Renbp
ENSMUSG00000056596	542.693	6.11006	0.717306	8.51807	1.62239e-17	9.42677e-16	Trnp1
ENSMUSG00000073000	248.192	3.02371	0.355193	8.51287	1.69683e-17	9.83603e-16	Gm10451
ENSMUSG00000060036	22953.4	1.40371	0.165668	8.47308	2.38996e-17	1.35659e-15	Rpl3
ENSMUSG00000021983	892.383	5.16868	0.612058	8.44476	3.04661e-17	1.71709e-15	Atp8a2
ENSMUSG00000020706	2230.79	0.936133	0.110956	8.43701	3.25548e-17	1.82679e-15	Ftsj3
ENSMUSG00000080775	735.558	1.36221	0.161492	8.43517	3.30726e-17	1.85161e-15	Gm6368
ENSMUSG00000012123	103.578	2.48231	0.294566	8.427	3.54626e-17	1.96749e-15	Crybg2
ENSMUSG00000040010	2434.61	2.09316	0.248418	8.42599	3.57711e-17	1.98014e-15	Slc7a5
ENSMUSG00000005131	137.336	4.33222	0.514272	8.42399	3.63879e-17	2.00976e-15	4930550C14Rik
ENSMUSG00000029661	5352.83	3.37467	0.40127	8.40997	4.10121e-17	2.24999e-15	Col1a2
ENSMUSG00000001424	2405.65	0.839042	0.09984	8.40387	4.32007e-17	2.36478e-15	Snd1
ENSMUSG00000030352	2288.98	3.85245	0.459758	8.37929	5.3247e-17	2.89537e-15	Tspan9
ENSMUSG00000024909	258.044	2.20815	0.26361	8.37659	5.44826e-17	2.95601e-15	Efemp2
ENSMUSG00000069792	543.815	2.84843	0.34019	8.37304	5.61482e-17	3.03299e-15	Wfdc17
ENSMUSG00000024679	274.334	2.37358	0.283544	8.37111	5.70773e-17	3.06968e-15	Ms4a6d
ENSMUSG00000023341	635.849	3.12537	0.37334	8.37137	5.69536e-17	3.06968e-15	Mx2
ENSMUSG00000026694	428.918	1.26431	0.1516	8.33977	7.44335e-17	3.90903e-15	Mettl13
ENSMUSG00000050147	171.613	2.06905	0.248361	8.33081	8.02884e-17	4.19857e-15	F2rl3
ENSMUSG00000029447	4520.11	0.901979	0.108348	8.32483	8.44467e-17	4.40665e-15	Cct6a
ENSMUSG00000090637	105.753	3.12443	0.37546	8.32161	8.67742e-17	4.51851e-15	Gm6189
ENSMUSG00000089764	473.869	1.64393	0.197857	8.30867	9.6779e-17	4.98665e-15	Gm16580
ENSMUSG00000025794	11282.5	1.56866	0.18913	8.29408	1.09426e-16	5.57982e-15	Rpl14
ENSMUSG00000028840	444.018	1.25891	0.151886	8.28852	1.14666e-16	5.83491e-15	Zfp593
ENSMUSG00000036816	19.6721	5.88275	0.710291	8.28217	1.20954e-16	6.14214e-15	Atoh7
ENSMUSG00000097906	4998.59	1.23307	0.149998	8.22063	2.02441e-16	9.95118e-15	Gm9625
ENSMUSG00000024620	2145.43	3.95992	0.481846	8.21823	2.06527e-16	1.01318e-14	Pdgfrb
ENSMUSG00000103845	25.8001	3.48458	0.424182	8.21481	2.12508e-16	1.04044e-14	Gm19026
ENSMUSG00000040964	1371.55	3.46007	0.421285	8.21312	2.1551e-16	1.05304e-14	Arhgef10l
ENSMUSG00000028378	718.055	2.16955	0.264182	8.21235	2.16908e-16	1.05777e-14	Ptgr1
ENSMUSG00000035443	1100.13	1.38797	0.169134	8.2063	2.28101e-16	1.10577e-14	Thyn1
ENSMUSG00000027889	1350.53	0.985175	0.120083	8.20409	2.32345e-16	1.11972e-14	Ampd2
ENSMUSG00000025130	7378.45	0.781633	0.09529	8.20267	2.35102e-16	1.12858e-14	P4hb
ENSMUSG00000025140	81.5211	3.11889	0.380296	8.20122	2.37964e-16	1.14009e-14	Pycr1
ENSMUSG00000092203	1232.53	1.95953	0.238957	8.20037	2.39641e-16	1.143e-14	1110038B12Rik
ENSMUSG00000039330	26.584	6.85808	0.836329	8.20021	2.39965e-16	1.143e-14	Tsga10ip
ENSMUSG00000062554	170.878	1.09767	0.133966	8.19366	2.534e-16	1.20001e-14	Gm12751
ENSMUSG00000042215	264.096	1.73481	0.21214	8.17765	2.89442e-16	1.35503e-14	Bag2
ENSMUSG00000095677	386.747	1.3956	0.171349	8.14478	3.79976e-16	1.74889e-14	Dynlt1f
ENSMUSG00000021710	513.153	1.50554	0.184967	8.1395	3.96903e-16	1.82338e-14	Nln
ENSMUSG00000027395	782.08	1.45004	0.178289	8.13309	4.18481e-16	1.91892e-14	Polr1b
ENSMUSG00000042379	127.571	3.06584	0.377655	8.1181	4.73537e-16	2.15529e-14	Esm1
ENSMUSG00000029304	438.073	4.0391	0.498235	8.10682	5.19603e-16	2.33897e-14	Spp1
ENSMUSG00000028683	472.621	1.26002	0.155506	8.10267	5.3768e-16	2.41592e-14	Eif2b3
ENSMUSG00000054226	398.793	0.830298	0.102481	8.102	5.40632e-16	2.42475e-14	Tprkb
ENSMUSG00000023942	6126.97	1.70821	0.21098	8.09653	5.65505e-16	2.5225e-14	Slc29a1
ENSMUSG00000038888	118.77	0.794075	0.0983388	8.07489	6.75377e-16	2.98015e-14	Ctu1
ENSMUSG00000021023	455.417	1.32903	0.164657	8.07149	6.94481e-16	3.05077e-14	1110008L16Rik
ENSMUSG00000024027	77.9162	6.77239	0.839063	8.07138	6.95107e-16	3.05077e-14	Glp1r
ENSMUSG00000023106	1361.48	0.671876	0.0833361	8.06224	7.49108e-16	3.27026e-14	Denr
ENSMUSG00000041949	264.11	0.896172	0.111282	8.05315	8.06898e-16	3.4977e-14	Tango6
ENSMUSG00000094497	393.264	0.942526	0.117603	8.01444	1.10643e-15	4.70484e-14	Gm8210
ENSMUSG00000032744	1155.43	4.06844	0.50773	8.01301	1.11936e-15	4.75158e-14	Heyl
ENSMUSG00000041625	365.488	1.7119	0.213709	8.01043	1.14311e-15	4.84404e-14	Ggact
ENSMUSG00000022407	1745.39	1.26005	0.157313	8.00986	1.14837e-15	4.85796e-14	Adsl
ENSMUSG00000017929	432.104	1.41719	0.176978	8.00773	1.16847e-15	4.93449e-14	B4galt5
ENSMUSG00000037805	13656.8	1.33252	0.166433	8.00632	1.18188e-15	4.98254e-14	Rpl10a
ENSMUSG00000034994	56095.1	0.734675	0.0918335	8.00008	1.2434e-15	5.22397e-14	Eef2
ENSMUSG00000022472	14724.2	1.76731	0.221002	7.9968	1.2769e-15	5.35558e-14	Desi1
ENSMUSG00000082901	5935.28	1.40623	0.175861	7.99625	1.28261e-15	5.37037e-14	Gm14323
ENSMUSG00000029816	925.102	3.89224	0.4874	7.98572	1.39706e-15	5.82968e-14	Gpnmb
ENSMUSG00000022346	2953.42	1.66789	0.208883	7.98479	1.40765e-15	5.86392e-14	Myc
ENSMUSG00000031776	1827.14	0.879777	0.110281	7.97757	1.49241e-15	6.17517e-14	Arl2bp
ENSMUSG00000057541	772.124	1.51259	0.189696	7.97378	1.53888e-15	6.33545e-14	Pus7
ENSMUSG00000026227	80.2578	5.86943	0.737297	7.96074	1.71014e-15	6.98204e-14	2810459M11Rik
ENSMUSG00000043460	1041.5	2.53143	0.318861	7.93896	2.03884e-15	8.25546e-14	Elfn2
ENSMUSG00000112797	18.6257	6.05275	0.762558	7.93744	2.06404e-15	8.34373e-14	AC152953,2
ENSMUSG00000057363	618.441	0.991134	0.124925	7.93385	2.12448e-15	8.55991e-14	Uxs1
ENSMUSG00000020430	2310.02	0.948101	0.11954	7.93122	2.17008e-15	8.71506e-14	Pes1
ENSMUSG00000021660	7900.13	0.933544	0.117744	7.92856	2.21698e-15	8.8889e-14	Btf3
ENSMUSG00000033307	3047.84	1.81951	0.229561	7.92606	2.26216e-15	9.02587e-14	Mif
ENSMUSG00000111118	136.297	3.04384	0.384102	7.92457	2.28944e-15	9.11992e-14	AC151730,1
ENSMUSG00000036693	1081.51	0.771167	0.0973945	7.91797	2.41411e-15	9.60098e-14	Nop14
ENSMUSG00000022466	1074.03	1.38479	0.174911	7.91713	2.4305e-15	9.65055e-14	Rpap3
ENSMUSG00000018697	851.006	1.09848	0.1388	7.91415	2.48945e-15	9.86867e-14	Aatf
ENSMUSG00000052544	157.058	3.41629	0.431804	7.91166	2.53982e-15	1.0036e-13	St6galnac3
ENSMUSG00000016028	3223.46	1.93624	0.244948	7.90471	2.68556e-15	1.05948e-13	Celsr1
ENSMUSG00000023923	715.133	0.97274	0.12311	7.9014	2.75797e-15	1.0863e-13	Tbc1d5
ENSMUSG00000028651	1192.76	1.25003	0.158434	7.88994	3.02321e-15	1.18887e-13	Ppie
ENSMUSG00000026036	476.117	0.934149	0.118476	7.88473	3.15221e-15	1.23565e-13	Nif3l1
ENSMUSG00000051934	1035.02	2.18331	0.277382	7.87113	3.51464e-15	1.37116e-13	Spats2
ENSMUSG00000001783	3295.76	0.750248	0.0953457	7.86872	3.58299e-15	1.3934e-13	Rtcb
ENSMUSG00000025591	262.352	1.22795	0.156137	7.86456	3.70385e-15	1.43586e-13	Tma16
ENSMUSG00000011008	427.7	1.6727	0.212871	7.85781	3.90912e-15	1.50829e-13	Mcoln2
ENSMUSG00000026377	1974.32	1.06386	0.135401	7.85707	3.9323e-15	1.51486e-13	Nifk
ENSMUSG00000046865	3383.35	1.81249	0.230995	7.84645	4.27983e-15	1.64359e-13	Fbl
ENSMUSG00000020692	798.19	1.1768	0.150141	7.83794	4.57995e-15	1.75336e-13	Nle1
ENSMUSG00000034164	1589.4	2.04099	0.26043	7.83702	4.6138e-15	1.76358e-13	Emid1
ENSMUSG00000040552	218.781	2.94536	0.376311	7.82692	4.9997e-15	1.90194e-13	C3ar1
ENSMUSG00000009185	1035.34	3.3569	0.428901	7.82674	5.00675e-15	1.90194e-13	Ccl8
ENSMUSG00000004929	596.567	1.33357	0.170612	7.81637	5.43695e-15	2.059e-13	Thop1
ENSMUSG00000049515	213.935	4.59238	0.587683	7.81438	5.52336e-15	2.0853e-13	Espnl
ENSMUSG00000043510	300.067	0.844678	0.108114	7.81281	5.59266e-15	2.105e-13	Hscb
ENSMUSG00000033356	335.198	1.33658	0.1713	7.80255	6.06682e-15	2.26956e-13	Pus7l
ENSMUSG00000050439	29.5802	4.40502	0.56456	7.80256	6.06626e-15	2.26956e-13	Enthd1
ENSMUSG00000031562	239.363	1.90834	0.244612	7.80149	6.11822e-15	2.28531e-13	Dctd
ENSMUSG00000032301	3887.43	0.910087	0.116729	7.79657	6.36102e-15	2.3724e-13	Psma4
ENSMUSG00000053398	5167.38	1.61931	0.207764	7.79398	6.49294e-15	2.41427e-13	Phgdh
ENSMUSG00000025534	1678.88	1.29574	0.166278	7.79261	6.56388e-15	2.43329e-13	Gusb
ENSMUSG00000070003	1815.82	1.59834	0.205202	7.78914	6.74677e-15	2.49356e-13	Ssbp4
ENSMUSG00000097039	67.4725	2.4944	0.320478	7.78337	7.06173e-15	2.60215e-13	Pvt1
ENSMUSG00000047649	420.371	1.07489	0.138159	7.78012	7.24544e-15	2.65789e-13	Cd3eap
ENSMUSG00000035064	1051.45	1.08487	0.139458	7.77917	7.30008e-15	2.67394e-13	Eef2k
ENSMUSG00000032399	38824	0.971232	0.124898	7.77618	7.47461e-15	2.72973e-13	Rpl4
ENSMUSG00000022945	1503.67	1.48698	0.19128	7.7738	7.61667e-15	2.77748e-13	Chaf1b
ENSMUSG00000071647	1183.79	0.580246	0.0746593	7.77193	7.73021e-15	2.81471e-13	Eml3
ENSMUSG00000104701	28.4375	5.67361	0.730491	7.76685	8.04624e-15	2.92545e-13	Gm42555
ENSMUSG00000022476	540.7	1.89879	0.244797	7.75658	8.72487e-15	3.16283e-13	Polr3h
ENSMUSG00000013236	2397.29	0.77747	0.100375	7.74562	9.51157e-15	3.43283e-13	Ptprs
ENSMUSG00000084349	2749.87	0.918482	0.118609	7.74378	9.65052e-15	3.4677e-13	Rpl3-ps1
ENSMUSG00000026192	3050.95	1.33498	0.172391	7.74388	9.64258e-15	3.4677e-13	Atic
ENSMUSG00000021548	845.962	0.714187	0.0922422	7.74252	9.74689e-15	3.49721e-13	Ccnh
ENSMUSG00000025403	3319.09	1.87722	0.242644	7.73651	1.02179e-14	3.66087e-13	Shmt2
ENSMUSG00000064264	145.381	1.96156	0.253582	7.7354	1.03076e-14	3.68226e-13	Zfp428
ENSMUSG00000021938	1198.57	1.07275	0.139015	7.71682	1.19265e-14	4.25444e-13	Pspc1
ENSMUSG00000001761	1660.85	1.22083	0.158228	7.71568	1.20343e-14	4.28665e-13	Smo
ENSMUSG00000030880	729.952	0.757858	0.0982477	7.71375	1.22177e-14	4.34553e-13	Polr3e
ENSMUSG00000020372	32009.1	0.967818	0.125482	7.71282	1.23069e-14	4.36478e-13	Rack1
ENSMUSG00000036427	7209.89	0.825918	0.10726	7.70014	1.35916e-14	4.79274e-13	Gpi1
ENSMUSG00000110823	18.8129	6.07013	0.788377	7.69952	1.36577e-14	4.80915e-13	AC167973,1
ENSMUSG00000020812	650.341	1.79072	0.232611	7.69832	1.37868e-14	4.84767e-13	1810032O08Rik
ENSMUSG00000045917	699.254	0.821892	0.106912	7.68755	1.49984e-14	5.25116e-13	Tmem268
ENSMUSG00000022935	155.679	6.25373	0.813578	7.6867	1.5098e-14	5.271e-13	Grik1
ENSMUSG00000001864	446.421	3.39237	0.441674	7.68072	1.58193e-14	5.515e-13	Aif1l
ENSMUSG00000017764	144.076	0.813965	0.106038	7.67619	1.63893e-14	5.7056e-13	Zswim1
ENSMUSG00000035964	64.0575	3.43271	0.448134	7.66001	1.8592e-14	6.44505e-13	Tmem59l
ENSMUSG00000033047	5195.19	1.24372	0.162452	7.6559	1.91961e-14	6.62643e-13	Eif3l
ENSMUSG00000039713	671.087	1.88585	0.246529	7.64963	2.0156e-14	6.92858e-13	Plekhg5
ENSMUSG00000070498	317.995	6.95022	0.908753	7.64808	2.04003e-14	6.98326e-13	Tmem132b
ENSMUSG00000022856	367.493	1.14687	0.150233	7.63394	2.27683e-14	7.76142e-13	Tmem41a
ENSMUSG00000028358	303.216	3.29373	0.431532	7.63264	2.29994e-14	7.82934e-13	Zfp618
ENSMUSG00000025020	123.053	4.27471	0.560487	7.62678	2.40683e-14	8.18189e-13	Slit1
ENSMUSG00000023963	538.597	2.96649	0.389025	7.62547	2.43154e-14	8.25447e-13	Cyp39a1
ENSMUSG00000075707	12.3498	4.17571	0.548186	7.61732	2.59002e-14	8.74415e-13	Dio3
ENSMUSG00000041360	1529.33	0.810979	0.106521	7.61333	2.67114e-14	9.00567e-13	Pum3
ENSMUSG00000015889	4002.91	0.929784	0.122347	7.59954	2.97182e-14	9.95113e-13	Lta4h
ENSMUSG00000021595	3839.78	1.11298	0.146468	7.59878	2.98932e-14	9.98255e-13	Nsun2
ENSMUSG00000022571	729.268	1.6636	0.219414	7.58201	3.4025e-14	1.13009e-12	Pycrl
ENSMUSG00000040026	237.275	3.87645	0.511757	7.57477	3.59755e-14	1.19326e-12	Saa3
ENSMUSG00000039356	1224.77	1.0419	0.137572	7.57348	3.63362e-14	1.20198e-12	Exosc2
ENSMUSG00000030744	27756	1.06467	0.140601	7.57229	3.66707e-14	1.21142e-12	Rps3
ENSMUSG00000011257	2600.8	1.30841	0.172894	7.56766	3.79994e-14	1.2534e-12	Pabpc4
ENSMUSG00000020592	973.335	2.24951	0.297438	7.56297	3.93984e-14	1.29456e-12	Sdc1
ENSMUSG00000024078	614.073	1.03028	0.1363	7.55887	4.06595e-14	1.33244e-12	Ttc27
ENSMUSG00000052759	364.018	2.76207	0.365633	7.55421	4.21399e-14	1.37728e-12	Gpr25
ENSMUSG00000017858	1003.8	0.466777	0.0618361	7.54862	4.39905e-14	1.42757e-12	Ift52
ENSMUSG00000025328	366.364	4.17394	0.553868	7.53598	4.84679e-14	1.56331e-12	Padi3
ENSMUSG00000034875	676.229	0.922507	0.122476	7.53213	4.9918e-14	1.60413e-12	Nudt19
ENSMUSG00000099398	35.9606	2.33483	0.309984	7.5321	4.99291e-14	1.60413e-12	Ms4a14
ENSMUSG00000062997	9645.23	1.55322	0.206351	7.52711	5.18761e-14	1.66233e-12	Rpl35
ENSMUSG00000003604	497.576	1.39979	0.186116	7.52106	5.43337e-14	1.7343e-12	Aven
ENSMUSG00000001482	997.381	0.931887	0.124204	7.50284	6.24491e-14	1.97454e-12	Def8
ENSMUSG00000041958	989.56	0.654854	0.087391	7.49339	6.71194e-14	2.11495e-12	Pigs
ENSMUSG00000025189	165.14	3.81242	0.509104	7.48848	6.96746e-14	2.19265e-12	Cnnm1
ENSMUSG00000035960	1687.91	1.35261	0.180993	7.47325	7.82389e-14	2.45902e-12	Apex1
ENSMUSG00000006732	296.356	1.3481	0.180398	7.47293	7.84289e-14	2.46184e-12	Mettl1
ENSMUSG00000018651	477.495	1.06258	0.142205	7.47214	7.89033e-14	2.47358e-12	Tada2a
ENSMUSG00000026187	955.084	0.922272	0.123756	7.45235	9.16944e-14	2.85485e-12	Xrcc5
ENSMUSG00000022797	4427.36	1.93901	0.260664	7.43874	1.0165e-13	3.15448e-12	Tfrc
ENSMUSG00000001785	1121.21	0.796575	0.10709	7.43838	1.01925e-13	3.15902e-12	Pwp1
ENSMUSG00000001056	1717.27	1.76522	0.237376	7.43638	1.03478e-13	3.20313e-12	Nhp2
ENSMUSG00000006728	6557.31	1.05396	0.141855	7.42984	1.08731e-13	3.36148e-12	Cdk4
ENSMUSG00000008668	22180.6	1.29813	0.174896	7.42231	1.15098e-13	3.55388e-12	Rps18
ENSMUSG00000020116	804.198	1.21729	0.164024	7.4214	1.1589e-13	3.57382e-12	Pno1
ENSMUSG00000032245	996.01	1.11602	0.150426	7.4191	1.17923e-13	3.62742e-12	Cln6
ENSMUSG00000056076	6567.88	1.20205	0.162099	7.41551	1.2116e-13	3.71768e-12	Eif3b
ENSMUSG00000028069	844.522	1.198	0.161581	7.41421	1.22353e-13	3.74963e-12	Gpatch4
ENSMUSG00000097769	215.474	1.57888	0.213202	7.40553	1.30628e-13	3.9883e-12	Snhg4
ENSMUSG00000028836	152.756	3.99126	0.539328	7.40043	1.35739e-13	4.13408e-12	Slc30a2
ENSMUSG00000047215	20874.1	0.992017	0.134094	7.39794	1.38312e-13	4.20722e-12	Rpl9
ENSMUSG00000031948	3467.17	0.86266	0.116788	7.38655	1.50684e-13	4.57223e-12	Kars
ENSMUSG00000022312	9587.82	1.13471	0.153792	7.37821	1.60437e-13	4.86017e-12	Eif3h
ENSMUSG00000040620	678.681	0.904179	0.12266	7.3714	1.68849e-13	5.08574e-12	Dhx33
ENSMUSG00000026914	2697.6	0.742538	0.100751	7.37005	1.70565e-13	5.12488e-12	Psmd14
ENSMUSG00000057666	25635.2	0.924604	0.125539	7.36509	1.77022e-13	5.3059e-12	Gapdh
ENSMUSG00000022754	121.518	2.35533	0.320084	7.35846	1.86049e-13	5.5629e-12	Tmem45a
ENSMUSG00000037280	3459.75	1.83354	0.249212	7.35735	1.87596e-13	5.59554e-12	Galnt6
ENSMUSG00000029614	16466.5	1.02284	0.139256	7.34504	2.05703e-13	6.106e-12	Rpl6
ENSMUSG00000027108	1692.35	0.857434	0.116879	7.3361	2.19915e-13	6.48868e-12	Ola1
ENSMUSG00000056749	255.036	2.60811	0.35559	7.3346	2.22385e-13	6.55368e-12	Nfil3
ENSMUSG00000060143	1653.08	1.53782	0.20971	7.33304	2.24987e-13	6.61451e-12	Gm10076
ENSMUSG00000030663	1816.88	0.429962	0.058656	7.33023	2.29765e-13	6.72281e-12	1110004F10Rik
ENSMUSG00000079602	22.7571	6.63353	0.90505	7.32946	2.31079e-13	6.75323e-12	9230102O04Rik
ENSMUSG00000087412	184.79	1.08576	0.148284	7.32219	2.43958e-13	7.11268e-12	Gm15501
ENSMUSG00000031161	587.815	0.915836	0.125128	7.31917	2.49518e-13	7.25757e-12	Hdac6
ENSMUSG00000029848	114.273	3.10318	0.424273	7.31412	2.59081e-13	7.52681e-12	Stra8
ENSMUSG00000018446	3128.76	1.39486	0.190802	7.31049	2.6617e-13	7.72363e-12	C1qbp
ENSMUSG00000031843	502.65	0.984623	0.134703	7.3096	2.67945e-13	7.75684e-12	Mphosph6
ENSMUSG00000020650	689.249	1.35883	0.186064	7.30301	2.81406e-13	8.12736e-12	Bcap29
ENSMUSG00000024177	235.049	1.71857	0.235339	7.30251	2.82457e-13	8.14815e-12	Nme4
ENSMUSG00000014782	69.4539	2.63874	0.361409	7.30127	2.85061e-13	8.21364e-12	Plekhg4
ENSMUSG00000035078	4813.82	2.49878	0.342345	7.29901	2.89899e-13	8.32377e-12	Mtmr9
ENSMUSG00000021322	63.6459	2.04039	0.279861	7.29072	3.08301e-13	8.7905e-12	Aoah
ENSMUSG00000050141	17.7906	6.56528	0.901696	7.28104	3.31261e-13	9.4124e-12	Fam205c
ENSMUSG00000022962	3055.07	1.04535	0.143633	7.27795	3.38943e-13	9.61957e-12	Gart
ENSMUSG00000095478	337.196	0.944986	0.129903	7.27455	3.47581e-13	9.84199e-12	Gm9824
ENSMUSG00000029603	4335.3	3.8507	0.530059	7.26468	3.73931e-13	1.05181e-11	Dtx1
ENSMUSG00000032939	1514.67	1.11549	0.153564	7.26404	3.75699e-13	1.05531e-11	Nup93
ENSMUSG00000038368	691.887	0.572552	0.0788414	7.26207	3.81201e-13	1.06954e-11	Focad
ENSMUSG00000040265	119.79	2.6286	0.36221	7.25711	3.95438e-13	1.10696e-11	Dnm3
ENSMUSG00000031575	1730.26	0.854147	0.117862	7.24703	4.25994e-13	1.18843e-11	Ash2l
ENSMUSG00000020481	19.1594	6.67658	0.923838	7.22701	4.93747e-13	1.36199e-11	Ankrd36
ENSMUSG00000087461	25.8661	7.40007	1.02464	7.22213	5.11779e-13	1.40542e-11	C230014O12Rik
ENSMUSG00000005413	1020.66	2.58722	0.358686	7.21304	5.47173e-13	1.4976e-11	Hmox1
ENSMUSG00000062397	4355.96	0.962311	0.133429	7.21214	5.50805e-13	1.50586e-11	Zfp706
ENSMUSG00000003848	1166.23	0.995492	0.138035	7.21188	5.51841e-13	1.50702e-11	Nob1
ENSMUSG00000042303	379.545	1.4701	0.204009	7.20606	5.75943e-13	1.56588e-11	Sgsm3
ENSMUSG00000038900	26140	1.29986	0.180763	7.19099	6.43225e-13	1.74687e-11	Rpl12
ENSMUSG00000028495	13934.7	1.18558	0.165013	7.18479	6.73097e-13	1.81795e-11	Rps6
ENSMUSG00000079641	9973.13	1.15772	0.161145	7.18434	6.75303e-13	1.82191e-11	Rpl39
ENSMUSG00000034024	8976.63	0.880366	0.122654	7.17766	7.09154e-13	1.90904e-11	Cct2
ENSMUSG00000031104	69.4794	2.21383	0.308737	7.17059	7.46743e-13	2.00584e-11	Rab33a
ENSMUSG00000090862	10023.9	1.2639	0.176556	7.15863	8.14845e-13	2.17706e-11	Rps13
ENSMUSG00000055633	245.163	1.99814	0.279877	7.13938	9.37551e-13	2.48577e-11	Zfp580
ENSMUSG00000024983	645.98	0.438998	0.0615115	7.13683	9.55046e-13	2.52671e-11	Vti1a
ENSMUSG00000024037	632.923	0.654384	0.0916993	7.1362	9.59494e-13	2.53575e-11	Wdr4
ENSMUSG00000024732	377.305	1.09004	0.152777	7.13486	9.68881e-13	2.5578e-11	Ccdc86
ENSMUSG00000026975	430.861	0.648425	0.0911922	7.11053	1.15595e-12	3.01923e-11	Dph7
ENSMUSG00000029408	1041.21	1.53544	0.216171	7.10291	1.22156e-12	3.18044e-11	Abcb9
ENSMUSG00000046434	15104.5	1.14131	0.160764	7.09928	1.25407e-12	3.26163e-11	Hnrnpa1
ENSMUSG00000010529	511.025	6.99462	0.98608	7.09336	1.30894e-12	3.39357e-11	Gm266
ENSMUSG00000025474	1026.62	0.815669	0.1151	7.08664	1.37408e-12	3.54645e-11	Tubgcp2
ENSMUSG00000025967	15567	1.20017	0.16948	7.08149	1.42612e-12	3.67027e-11	Eef1b2
ENSMUSG00000031860	47.4088	3.09911	0.437681	7.08076	1.43369e-12	3.68205e-11	Pbx4
ENSMUSG00000021048	2097.68	1.26694	0.178954	7.07969	1.44481e-12	3.70673e-11	Mthfd1
ENSMUSG00000026496	4812.89	1.09298	0.154402	7.0788	1.45412e-12	3.72674e-11	Parp1
ENSMUSG00000000561	860.298	0.943033	0.133225	7.0785	1.45723e-12	3.7308e-11	Wdr77
ENSMUSG00000024982	1012.93	0.466153	0.0658976	7.07389	1.50645e-12	3.85281e-11	Zdhhc6
ENSMUSG00000012405	8551.96	1.02095	0.144526	7.06412	1.61633e-12	4.11671e-11	Rpl15
ENSMUSG00000018398	1081.16	2.46159	0.348701	7.05932	1.67318e-12	4.25267e-11	2008-09-01
ENSMUSG00000030224	3390.85	0.718332	0.101774	7.05812	1.68771e-12	4.28076e-11	Strap
ENSMUSG00000028741	1383.18	1.41528	0.200826	7.04726	1.82475e-12	4.59515e-11	Mrto4
ENSMUSG00000037742	134411	0.768749	0.109115	7.04531	1.85045e-12	4.65034e-11	Eef1a1
ENSMUSG00000039671	1383.92	0.772149	0.109719	7.03748	1.95741e-12	4.89911e-11	Zmynd8
ENSMUSG00000035067	783.124	1.75066	0.248787	7.03678	1.96732e-12	4.91891e-11	Xkr6
ENSMUSG00000078202	465.159	2.3735	0.33732	7.03636	1.97321e-12	4.92862e-11	Nrarp
ENSMUSG00000083087	57.8956	2.01118	0.286019	7.03163	2.04141e-12	5.08347e-11	Gm11249
ENSMUSG00000038299	1380.65	0.790312	0.112469	7.02694	2.11114e-12	5.23589e-11	Wdr36
ENSMUSG00000042389	270.339	0.954336	0.135894	7.02265	2.177e-12	5.38834e-11	Tsen2
ENSMUSG00000060594	51.8815	2.50535	0.356776	7.02217	2.18445e-12	5.39591e-11	Layn
ENSMUSG00000059089	103.491	3.34354	0.476217	7.02105	2.20201e-12	5.43384e-11	Fcgr4
ENSMUSG00000066877	2667.35	1.15247	0.164316	7.0137	2.32089e-12	5.69859e-11	Nck2
ENSMUSG00000063816	65.4259	2.30389	0.328645	7.01026	2.3787e-12	5.82987e-11	Gm4987
ENSMUSG00000054474	334.673	2.34166	0.334129	7.00823	2.41346e-12	5.90229e-11	Thnsl2
ENSMUSG00000022554	600.104	1.43862	0.205456	7.00212	2.5212e-12	6.14743e-11	Hgh1
ENSMUSG00000027722	445.044	0.737745	0.105365	7.00183	2.52638e-12	6.15266e-11	Spata5
ENSMUSG00000053117	56.5892	4.84637	0.692792	6.99541	2.64482e-12	6.40437e-11	E330013P04Rik
ENSMUSG00000047669	270.422	1.90097	0.27184	6.99296	2.69137e-12	6.51069e-11	Msl3l2
ENSMUSG00000022247	1633.83	1.42047	0.20317	6.99155	2.71869e-12	6.56386e-11	Brix1
ENSMUSG00000032300	1771.8	1.17111	0.167538	6.99013	2.74629e-12	6.62078e-11	1700017B05Rik
ENSMUSG00000054967	50.3142	1.43726	0.205628	6.9896	2.75675e-12	6.63619e-11	Zfp647
ENSMUSG00000022748	364.636	1.44961	0.207572	6.98361	2.87684e-12	6.91849e-11	Cmss1
ENSMUSG00000063904	1902.92	0.568948	0.0815114	6.97998	2.95213e-12	7.07878e-11	4930533O14Rik
ENSMUSG00000074578	1269	1.49737	0.215044	6.9631	3.3287e-12	7.92759e-11	Zfas1
ENSMUSG00000027993	326.383	3.05511	0.439385	6.95316	3.57198e-12	8.47415e-11	Trim2
ENSMUSG00000005846	3375.19	1.10153	0.158442	6.95226	3.59489e-12	8.52028e-11	Rsl1d1
ENSMUSG00000043587	203.402	1.25143	0.180237	6.94325	3.83169e-12	9.03792e-11	Pxylp1
ENSMUSG00000032518	41136.4	1.17546	0.169326	6.94201	3.86571e-12	9.10944e-11	Rpsa
ENSMUSG00000051243	161.196	4.49523	0.647665	6.94067	3.90246e-12	9.17845e-11	Islr2
ENSMUSG00000031375	2341.83	2.29569	0.33078	6.94022	3.915e-12	9.19913e-11	Bgn
ENSMUSG00000114136	15.2787	3.09099	0.445524	6.93786	3.98081e-12	9.32702e-11	CT010452,1
ENSMUSG00000009927	17880.4	1.30289	0.187801	6.93759	3.98857e-12	9.32741e-11	Rps25
ENSMUSG00000052369	646.284	1.09023	0.157158	6.93718	3.99999e-12	9.34523e-11	Tmem106c
ENSMUSG00000027423	3919.24	0.672089	0.0969199	6.93448	4.07723e-12	9.51664e-11	Snx5
ENSMUSG00000107799	8.61542	6.39441	0.92226	6.93341	4.10802e-12	9.5794e-11	Gm38825
ENSMUSG00000081684	64.6956	1.91545	0.276727	6.9218	4.45927e-12	1.03592e-10	Rps2-ps13
ENSMUSG00000037149	3122.06	0.812402	0.117455	6.91669	4.62308e-12	1.07296e-10	Ddx1
ENSMUSG00000074039	71.5265	1.25207	0.181081	6.91441	4.69812e-12	1.08832e-10	4930520O04Rik
ENSMUSG00000037148	545.433	0.714616	0.103389	6.9119	4.78202e-12	1.10671e-10	Arhgap10
ENSMUSG00000028430	1255.2	0.800543	0.115928	6.90551	5.00231e-12	1.15335e-10	Nol6
ENSMUSG00000043613	92.1143	3.32363	0.481732	6.89935	5.22427e-12	1.19667e-10	Mmp3
ENSMUSG00000037331	4798.46	0.938985	0.136246	6.89183	5.50794e-12	1.25579e-10	Larp1
ENSMUSG00000047675	14410.2	1.45901	0.211701	6.89185	5.50698e-12	1.25579e-10	Rps8
ENSMUSG00000045672	1473.14	3.38391	0.491065	6.89096	5.54155e-12	1.26228e-10	Col27a1
ENSMUSG00000053550	82.2899	5.2832	0.766759	6.8903	5.56739e-12	1.26698e-10	Shisa7
ENSMUSG00000074656	3426.12	0.8629	0.125286	6.88744	5.68042e-12	1.28913e-10	Eif2s2
ENSMUSG00000020929	3547.85	0.841738	0.122331	6.88085	5.94974e-12	1.34158e-10	Eftud2
ENSMUSG00000058558	21163.5	0.957934	0.139215	6.88095	5.94541e-12	1.34158e-10	Rpl5
ENSMUSG00000038371	1148.12	2.05889	0.29921	6.88108	5.94023e-12	1.34158e-10	Sbf2
ENSMUSG00000008373	1311.31	0.870315	0.126625	6.87316	6.27949e-12	1.40947e-10	Prpf31
ENSMUSG00000053368	13.7554	3.73037	0.542898	6.87122	6.36554e-12	1.42618e-10	Rxfp2
ENSMUSG00000020325	211.589	2.54457	0.370651	6.86513	6.64297e-12	1.48563e-10	Fstl3
ENSMUSG00000024608	29491.5	1.15519	0.168458	6.85742	7.01152e-12	1.56237e-10	Rps14
ENSMUSG00000022234	10382.1	1.23378	0.180038	6.85288	7.2376e-12	1.60983e-10	Cct5
ENSMUSG00000035561	1707.96	3.53326	0.516437	6.84161	7.83101e-12	1.73397e-10	Aldh1b1
ENSMUSG00000063229	15639	1.17163	0.171379	6.83648	8.11622e-12	1.79389e-10	Ldha
ENSMUSG00000074344	31.491	3.93046	0.575098	6.83441	8.23424e-12	1.81834e-10	Tmigd3
ENSMUSG00000024539	1048.28	0.684867	0.100229	6.83303	8.31401e-12	1.83431e-10	Ptpn2
ENSMUSG00000021131	2951.83	1.28089	0.187607	6.82755	8.63783e-12	1.90234e-10	Erh
ENSMUSG00000025872	963.095	0.711926	0.104279	6.82709	8.66532e-12	1.90668e-10	Thoc3
ENSMUSG00000022557	2270.44	1.35238	0.198109	6.82643	8.70535e-12	1.91378e-10	Bop1
ENSMUSG00000004530	2315.45	0.828116	0.121355	6.82392	8.85893e-12	1.9458e-10	Coro1c
ENSMUSG00000031167	11833	1.12172	0.164396	6.82327	8.8993e-12	1.95292e-10	Rbm3
ENSMUSG00000046791	559.442	1.04458	0.15343	6.80819	9.88344e-12	2.15541e-10	Riox1
ENSMUSG00000022009	619.328	0.949469	0.139484	6.807	9.96536e-12	2.17135e-10	Nufip1
ENSMUSG00000037905	879.144	1.31657	0.193454	6.80557	1.00651e-11	2.1892e-10	Bri3bp
ENSMUSG00000029208	698.909	0.69974	0.102874	6.80192	1.03233e-11	2.23941e-10	Guf1
ENSMUSG00000029544	51.8285	4.14021	0.609437	6.7935	1.09446e-11	2.36584e-10	Cabp1
ENSMUSG00000062683	1870.83	1.64739	0.242589	6.7909	1.11438e-11	2.40679e-10	Atp5g2
ENSMUSG00000036185	626.107	3.18958	0.470049	6.78564	1.1557e-11	2.48563e-10	Sapcd1
ENSMUSG00000020075	3981.95	1.00476	0.148219	6.77892	1.21074e-11	2.59439e-10	Ddx21
ENSMUSG00000025374	741.431	1.19439	0.176212	6.77818	1.21697e-11	2.60545e-10	Nabp2
ENSMUSG00000032601	695.331	1.83241	0.270439	6.7757	1.23808e-11	2.64375e-10	Prkar2a
ENSMUSG00000020877	266.632	1.1932	0.176233	6.77058	1.28265e-11	2.72707e-10	Scrn2
ENSMUSG00000025613	8456.11	1.00463	0.148402	6.76964	1.29101e-11	2.74011e-10	Cct8
ENSMUSG00000015176	2837.74	1.25613	0.185637	6.76657	1.31868e-11	2.79643e-10	Nolc1
ENSMUSG00000025917	1920.27	0.722822	0.106958	6.758	1.39908e-11	2.95163e-10	Cops5
ENSMUSG00000000346	7199.72	1.03928	0.153856	6.75487	1.42968e-11	3.01103e-10	Dazap2
ENSMUSG00000066150	774.231	0.653951	0.0968291	6.75366	1.44158e-11	3.03348e-10	Slc31a1
ENSMUSG00000040935	65.8092	2.53046	0.374712	6.75307	1.44752e-11	3.03819e-10	Padi6
ENSMUSG00000033967	40.4944	2.36532	0.350824	6.74218	1.56026e-11	3.25779e-10	Rnf225
ENSMUSG00000038304	185.491	2.5757	0.382086	6.74115	1.57136e-11	3.27572e-10	Cd160
ENSMUSG00000071644	11163.5	1.16002	0.172159	6.73808	1.60491e-11	3.33717e-10	Eef1g
ENSMUSG00000038510	1051.77	1.18089	0.175362	6.734	1.65064e-11	3.42647e-10	Rpf2
ENSMUSG00000102550	176.959	1.4466	0.215081	6.72583	1.74598e-11	3.60309e-10	Gm8276
ENSMUSG00000024493	1817.26	0.763244	0.113552	6.72153	1.79832e-11	3.70798e-10	Lars
ENSMUSG00000028757	2696.52	0.668107	0.0994031	6.72119	1.80252e-11	3.71313e-10	Ddost
ENSMUSG00000096842	2666.17	1.38405	0.205948	6.72041	1.8121e-11	3.72701e-10	Gm10736
ENSMUSG00000087613	6.46996	5.08545	0.75745	6.7139	1.8949e-11	3.8908e-10	Gm13855
ENSMUSG00000025007	1373.04	1.17934	0.175673	6.71324	1.90352e-11	3.90523e-10	Aldh18a1
ENSMUSG00000014837	278.971	0.875118	0.130394	6.71136	1.92817e-11	3.95104e-10	4931428F04Rik
ENSMUSG00000095567	3175.31	0.990001	0.147513	6.71129	1.92906e-11	3.95104e-10	Noc2l
ENSMUSG00000028524	95.5214	2.89763	0.432097	6.70597	2.00079e-11	4.08434e-10	Sgip1
ENSMUSG00000011877	1701.34	0.422096	0.0630275	6.697	2.12737e-11	4.32121e-10	Git1
ENSMUSG00000087213	130.551	1.71838	0.256693	6.69428	2.16733e-11	4.39511e-10	2810408I11Rik
ENSMUSG00000028081	11535.2	0.94023	0.140492	6.69241	2.19525e-11	4.44805e-10	Rps3a1
ENSMUSG00000026020	4196.35	1.32495	0.198001	6.69163	2.20693e-11	4.46803e-10	Nop58
ENSMUSG00000067714	102.798	1.51174	0.226058	6.6874	2.27173e-11	4.59167e-10	Lpar5
ENSMUSG00000027864	722.584	1.36069	0.203623	6.68238	2.35087e-11	4.73993e-10	Ptgfrn
ENSMUSG00000041035	457.334	1.45327	0.217623	6.67791	2.42378e-11	4.87493e-10	Gm17018
ENSMUSG00000112546	44.6847	1.48309	0.222233	6.67359	2.49621e-11	5.00832e-10	AC155293,1
ENSMUSG00000064179	377.458	2.3592	0.353749	6.66915	2.57284e-11	5.15364e-10	Tnnt1
ENSMUSG00000028394	1470.19	1.12721	0.169262	6.65957	2.74624e-11	5.48756e-10	Pole3
ENSMUSG00000036371	12702.3	0.933765	0.140238	6.65844	2.76756e-11	5.52568e-10	Serbp1
ENSMUSG00000032834	834.058	0.771613	0.115922	6.65632	2.80771e-11	5.60128e-10	Pwp2
ENSMUSG00000006442	1287.49	1.38791	0.208582	6.65402	2.85202e-11	5.68047e-10	Srm
ENSMUSG00000086152	21.3151	3.93314	0.591435	6.65017	2.92764e-11	5.81693e-10	Gm11454
ENSMUSG00000030316	534.723	1.04897	0.157846	6.64552	3.02147e-11	5.98884e-10	Tamm41
ENSMUSG00000072582	635.895	0.743694	0.111914	6.64522	3.02759e-11	5.99615e-10	Ptrh2
ENSMUSG00000030592	81.6069	3.30001	0.496757	6.64311	3.07133e-11	6.07786e-10	Ryr1
ENSMUSG00000085024	22.5092	2.46753	0.371886	6.63518	3.24096e-11	6.38785e-10	C230035I16Rik
ENSMUSG00000062611	1592.78	0.93509	0.140967	6.6334	3.28044e-11	6.4553e-10	Rps3a2
ENSMUSG00000081434	326.343	1.39791	0.210744	6.6332	3.28485e-11	6.45881e-10	Gm14165
ENSMUSG00000027823	2414.61	0.848594	0.127949	6.6323	3.30496e-11	6.49315e-10	Gmps
ENSMUSG00000042286	767.351	2.84621	0.429416	6.62809	3.40063e-11	6.65452e-10	Stab1
ENSMUSG00000045005	295.343	1.76589	0.266688	6.62153	3.55496e-11	6.92344e-10	Fzd5
ENSMUSG00000058600	10174.4	1.58284	0.239296	6.61457	3.72644e-11	7.24019e-10	Rpl30
ENSMUSG00000027649	2076.68	1.00369	0.151756	6.61384	3.74466e-11	7.26984e-10	Ctnnbl1
ENSMUSG00000028833	952.404	0.627782	0.094924	6.61352	3.75284e-11	7.27997e-10	Ncdn
ENSMUSG00000053801	691.549	1.28775	0.194871	6.60822	3.88978e-11	7.52187e-10	Grwd1
ENSMUSG00000036186	390.932	3.67286	0.556388	6.60126	4.07669e-11	7.85858e-10	Fam69b
ENSMUSG00000043439	216.539	2.47309	0.374655	6.60096	4.08502e-11	7.86846e-10	Epop
ENSMUSG00000046364	11452.1	1.27568	0.193349	6.5978	4.173e-11	8.03163e-10	Rpl27a
ENSMUSG00000067288	7002.91	1.37392	0.208292	6.59615	4.21984e-11	8.11543e-10	Rps28
ENSMUSG00000055446	22.3579	2.46305	0.373533	6.59393	4.28342e-11	8.21841e-10	A630091E08Rik
ENSMUSG00000034220	1705.68	1.35959	0.206192	6.59381	4.28693e-11	8.21873e-10	Gpc1
ENSMUSG00000000579	110.548	0.94317	0.143091	6.59141	4.35669e-11	8.33946e-10	Dynlt1c
ENSMUSG00000003644	1958.26	1.16292	0.176454	6.59049	4.38364e-11	8.38452e-10	Rps6ka1
ENSMUSG00000029821	106.586	2.44839	0.37159	6.58895	4.42959e-11	8.45924e-10	Dfna5
ENSMUSG00000020956	105.759	0.987737	0.15004	6.58317	4.6053e-11	8.76756e-10	Dtd2
ENSMUSG00000035407	575.904	5.42263	0.824259	6.57879	4.74287e-11	9.01549e-10	Kank4
ENSMUSG00000024008	327.596	2.29486	0.349224	6.5713	4.98783e-11	9.44459e-10	Cpne5
ENSMUSG00000085156	207.299	1.57135	0.23931	6.56617	5.16275e-11	9.76202e-10	Snhg15
ENSMUSG00000044573	473.51	1.01801	0.155201	6.55926	5.40746e-11	1.01765e-09	Acp1
ENSMUSG00000033701	979.377	0.922664	0.140676	6.55877	5.42545e-11	1.02025e-09	Acbd6
ENSMUSG00000061477	17841.6	1.0182	0.155259	6.55809	5.4503e-11	1.02414e-09	Rps7
ENSMUSG00000037563	13156.7	1.35595	0.206915	6.5532	5.63185e-11	1.05503e-09	Rps16
ENSMUSG00000074182	375.439	0.884214	0.134952	6.55206	5.67492e-11	1.06229e-09	Znhit6
ENSMUSG00000016664	1389.09	0.926896	0.141471	6.55183	5.68352e-11	1.06309e-09	Pacsin2
ENSMUSG00000034121	122.279	0.866293	0.132234	6.55122	5.70686e-11	1.06664e-09	Mks1
ENSMUSG00000067995	797.355	0.877961	0.134021	6.55092	5.71839e-11	1.06798e-09	Gtf2f2
ENSMUSG00000071113	16.8468	2.21917	0.339263	6.54113	6.10542e-11	1.13595e-09	Mboat4
ENSMUSG00000074037	35.8375	3.23967	0.495679	6.53583	6.32571e-11	1.17427e-09	Mc1r
ENSMUSG00000022538	1035.11	0.621881	0.0951726	6.53425	6.39308e-11	1.18532e-09	Lsg1
ENSMUSG00000023031	93.1957	2.70237	0.413622	6.53342	6.42843e-11	1.18974e-09	Cela1
ENSMUSG00000001416	6399.19	0.901246	0.137985	6.53149	6.51198e-11	1.2043e-09	Cct3
ENSMUSG00000034371	401.514	0.658627	0.100895	6.52788	6.67088e-11	1.22998e-09	Tkfc
ENSMUSG00000029594	776.475	0.82136	0.12583	6.52753	6.6865e-11	1.23194e-09	Rbm19
ENSMUSG00000101389	186.168	2.92814	0.448821	6.52408	6.84219e-11	1.2578e-09	Ms4a4a
ENSMUSG00000022471	18507.1	1.81576	0.278407	6.52195	6.94003e-11	1.27483e-09	Xrcc6
ENSMUSG00000097307	4.9896	4.70756	0.721864	6.52139	6.96586e-11	1.27862e-09	Gm26834
ENSMUSG00000028811	1792.07	1.16133	0.178351	6.51152	7.43941e-11	1.35844e-09	Yars
ENSMUSG00000027596	129.157	2.04271	0.314077	6.50385	7.82915e-11	1.42431e-09	a
ENSMUSG00000068114	1091.81	1.45099	0.223188	6.50121	7.96789e-11	1.44741e-09	Ccdc134
ENSMUSG00000063785	1125.06	0.666582	0.102589	6.49759	8.16144e-11	1.48119e-09	Utp14a
ENSMUSG00000026245	1434.23	0.776231	0.119468	6.4974	8.1719e-11	1.48119e-09	Farsb
ENSMUSG00000107788	31.4134	1.59151	0.244943	6.49747	8.16813e-11	1.48119e-09	Gm6266
ENSMUSG00000021508	145.468	3.22331	0.49615	6.49664	8.21357e-11	1.48734e-09	Cxcl14
ENSMUSG00000007888	13.7644	3.71783	0.572278	6.49656	8.21794e-11	1.48734e-09	Crlf1
ENSMUSG00000071652	1044.79	0.855168	0.131688	6.49389	8.36458e-11	1.51165e-09	Ints5
ENSMUSG00000049517	16147.5	1.18257	0.182167	6.4917	8.48713e-11	1.53267e-09	Rps23
ENSMUSG00000073598	44.476	2.13459	0.329053	6.48708	8.75182e-11	1.57353e-09	1700066B19Rik
ENSMUSG00000032959	2398.09	0.964559	0.14881	6.48183	9.06144e-11	1.62327e-09	Pebp1
ENSMUSG00000048827	56.3101	3.05243	0.471037	6.48024	9.15778e-11	1.63814e-09	Pkd1l3
ENSMUSG00000028927	919.891	1.89746	0.292924	6.47766	9.31577e-11	1.65821e-09	Padi2
ENSMUSG00000033373	961.924	1.32553	0.204688	6.47586	9.42735e-11	1.67494e-09	Fntb
ENSMUSG00000032327	243.768	3.59365	0.554936	6.47579	9.43169e-11	1.67494e-09	Stra6
ENSMUSG00000024873	41.2252	2.11647	0.326859	6.4752	9.46854e-11	1.67785e-09	Cnih2
ENSMUSG00000057863	9016.86	1.52858	0.236076	6.47496	9.48351e-11	1.67929e-09	Rpl36
ENSMUSG00000030662	4952.98	1.13232	0.17488	6.47484	9.49119e-11	1.67944e-09	Ipo5
ENSMUSG00000030738	6431.45	0.610294	0.0942764	6.47345	9.57883e-11	1.6913e-09	Eif3c
ENSMUSG00000062328	18301.6	0.992571	0.153391	6.47086	9.74472e-11	1.71443e-09	Rpl17
ENSMUSG00000016637	658.544	1.79571	0.277569	6.46942	9.83769e-11	1.72708e-09	Ift27
ENSMUSG00000027848	174.082	2.28011	0.352582	6.46691	1.00027e-10	1.75353e-09	Olfml3
ENSMUSG00000025362	12476.7	1.44253	0.223119	6.46531	1.01092e-10	1.77096e-09	Rps26
ENSMUSG00000108841	46.9308	3.13344	0.484781	6.46361	1.02234e-10	1.78967e-09	Frmpd2
ENSMUSG00000019842	407.074	0.969594	0.150312	6.45054	1.11451e-10	1.94964e-09	Traf3ip2
ENSMUSG00000018848	1980.06	0.823707	0.127705	6.45007	1.11799e-10	1.95434e-09	Rars
ENSMUSG00000041143	847.529	1.06222	0.164772	6.44659	1.14395e-10	1.99263e-09	Tmco4
ENSMUSG00000071415	20189.7	1.18314	0.183578	6.44485	1.15711e-10	2.01413e-09	Rpl23
ENSMUSG00000003970	35658.6	1.68203	0.261086	6.44245	1.17563e-10	2.04492e-09	Rpl8
ENSMUSG00000041774	201.607	1.71292	0.265912	6.44167	1.18165e-10	2.05393e-09	Ydjc
ENSMUSG00000059540	126.672	1.2944	0.201039	6.43855	1.2062e-10	2.09364e-09	Tcea2
ENSMUSG00000035900	1581.66	1.00842	0.156716	6.43472	1.23703e-10	2.14412e-09	Gramd4
ENSMUSG00000063576	1832.55	0.637902	0.0991934	6.43089	1.26861e-10	2.19422e-09	Klhdc3
ENSMUSG00000083669	45.7409	1.72652	0.268779	6.42356	1.3312e-10	2.29441e-09	Gm10169
ENSMUSG00000030432	9218.06	1.2909	0.20103	6.42144	1.34992e-10	2.32341e-09	Rpl28
ENSMUSG00000057262	1127.02	0.954538	0.148686	6.41984	1.36418e-10	2.34631e-09	Gm10020
ENSMUSG00000018008	1199.47	1.48645	0.231579	6.41875	1.37397e-10	2.35985e-09	Cyth4
ENSMUSG00000006403	28.0221	2.35992	0.367657	6.4188	1.37352e-10	2.35985e-09	Adamts4
ENSMUSG00000057858	610.031	0.636418	0.099195	6.41582	1.40066e-10	2.40234e-09	Fam204a
ENSMUSG00000066554	519.35	0.943125	0.147018	6.41505	1.40776e-10	2.41114e-09	Gm10167
ENSMUSG00000028655	61.8126	2.07163	0.323121	6.41132	1.44267e-10	2.46922e-09	Mfsd2a
ENSMUSG00000097195	787.756	0.961633	0.150013	6.41032	1.45212e-10	2.48021e-09	Snhg5
ENSMUSG00000055629	118.993	3.67609	0.573827	6.40627	1.49123e-10	2.54171e-09	B4galnt4
ENSMUSG00000006724	10.9777	2.64775	0.413359	6.40545	1.49926e-10	2.55363e-09	Cyp27b1
ENSMUSG00000000740	16887.7	1.32061	0.206201	6.40448	1.50884e-10	2.56816e-09	Rpl13
ENSMUSG00000006369	1075.4	3.02464	0.472489	6.4015	1.53854e-10	2.61149e-09	Fbln1
ENSMUSG00000008682	17166.7	0.999653	0.156206	6.39958	1.55801e-10	2.64105e-09	Rpl10
ENSMUSG00000014786	389.7	1.4915	0.233094	6.39868	1.56726e-10	2.65346e-09	Slc9a5
ENSMUSG00000032463	386.748	0.842381	0.131786	6.39202	1.63713e-10	2.76355e-09	Faim
ENSMUSG00000114642	41.5532	1.70369	0.26703	6.38013	1.76938e-10	2.9725e-09	AC154435,1
ENSMUSG00000020224	409.215	0.980423	0.153686	6.37938	1.77802e-10	2.98092e-09	Llph
ENSMUSG00000034321	430.146	0.894932	0.1404	6.37418	1.83949e-10	3.07977e-09	Exosc1
ENSMUSG00000040035	16.9002	2.48146	0.389773	6.36642	1.93485e-10	3.23062e-09	Disp2
ENSMUSG00000017999	1765.83	0.728961	0.114569	6.36261	1.98349e-10	3.30959e-09	Ddx27
ENSMUSG00000063354	106.162	2.66744	0.419521	6.3583	2.03998e-10	3.39693e-09	Slc39a4
ENSMUSG00000074738	136.456	1.16819	0.183738	6.35793	2.04494e-10	3.40111e-09	Fndc10
ENSMUSG00000026592	30.0435	3.3819	0.53192	6.3579	2.04526e-10	3.40111e-09	Tex35
ENSMUSG00000024587	2852.16	0.846562	0.133274	6.35204	2.12472e-10	3.5237e-09	Nars
ENSMUSG00000033294	964.257	0.885344	0.139451	6.3488	2.17003e-10	3.59643e-09	Noc4l
ENSMUSG00000089938	18.7304	3.01872	0.475544	6.34792	2.18241e-10	3.61451e-09	Gm15744
ENSMUSG00000026234	20741.3	1.09346	0.172304	6.34613	2.20798e-10	3.65439e-09	Ncl
ENSMUSG00000040139	113.578	1.51245	0.238348	6.34556	2.21614e-10	3.66543e-09	9430038I01Rik
ENSMUSG00000090489	221.432	0.842543	0.132793	6.34477	2.22762e-10	3.68194e-09	Gm17415
ENSMUSG00000091655	111.012	1.62656	0.256511	6.34106	2.28183e-10	3.76142e-09	Gm8741
ENSMUSG00000030795	10973.9	0.813205	0.12835	6.33586	2.36026e-10	3.88811e-09	Fus
ENSMUSG00000028099	994.183	0.483142	0.0762864	6.33326	2.40031e-10	3.94879e-09	Polr3c
ENSMUSG00000029598	869.373	1.01123	0.159672	6.33313	2.40233e-10	3.94947e-09	Plbd2
ENSMUSG00000066245	165.666	1.84004	0.290574	6.33243	2.41326e-10	3.96478e-09	Gm10156
ENSMUSG00000031939	1463.24	1.05648	0.167002	6.32614	2.51367e-10	4.12422e-09	Taf1d
ENSMUSG00000053333	642.374	0.52224	0.0825886	6.32339	2.55888e-10	4.19281e-09	Dis3l2
ENSMUSG00000036106	442.727	3.36508	0.532381	6.32082	2.60173e-10	4.25734e-09	Prr5
ENSMUSG00000093904	2897.02	0.808239	0.127871	6.32071	2.60363e-10	4.25762e-09	Tomm20
ENSMUSG00000018882	829.374	0.666123	0.10545	6.31695	2.66769e-10	4.35658e-09	Mrpl45
ENSMUSG00000007029	5724.18	1.38705	0.219629	6.31545	2.69379e-10	4.39627e-09	Vars
ENSMUSG00000076441	1157.31	2.04888	0.3246	6.312	2.75455e-10	4.48948e-09	Ass1
ENSMUSG00000038807	800.346	2.46284	0.390336	6.30955	2.79849e-10	4.54903e-09	Rap1gap2
ENSMUSG00000052848	17.8944	6.86808	1.08946	6.30411	2.89853e-10	4.70231e-09	C130026L21Rik
ENSMUSG00000020648	131.487	1.07539	0.170628	6.30258	2.92724e-10	4.73951e-09	Dus4l
ENSMUSG00000051639	174.851	1.72176	0.273299	6.29993	2.97783e-10	4.81507e-09	Gm5812
ENSMUSG00000021645	877.917	1.00141	0.158988	6.29865	3.00253e-10	4.84863e-09	Smn1
ENSMUSG00000036285	665.902	0.735972	0.116854	6.29822	3.01082e-10	4.85882e-09	Noa1
ENSMUSG00000111875	66.4634	1.70324	0.270666	6.29277	3.11859e-10	5.02614e-09	AC158239,2
ENSMUSG00000048707	278.855	0.777702	0.123623	6.29093	3.15567e-10	5.08258e-09	Tprn
ENSMUSG00000096351	22.4667	3.41932	0.543813	6.28767	3.22257e-10	5.18353e-09	Samd11
ENSMUSG00000031967	1465.8	0.763502	0.121433	6.28742	3.2279e-10	5.18871e-09	Afg3l1
ENSMUSG00000056167	1669.75	0.701561	0.111586	6.28719	3.23255e-10	5.19279e-09	Cnot10
ENSMUSG00000031984	978.909	0.644753	0.102583	6.28517	3.27496e-10	5.24719e-09	2810004N23Rik
ENSMUSG00000090273	32.7404	2.1804	0.347004	6.2835	3.31044e-10	5.30059e-09	Prr22
ENSMUSG00000024271	2028.54	0.532104	0.0846936	6.28269	3.32754e-10	5.3245e-09	Elp2
ENSMUSG00000063480	4604.52	1.38464	0.220433	6.28145	3.35421e-10	5.36369e-09	Snu13
ENSMUSG00000036167	1118.25	0.775724	0.123504	6.28095	3.36502e-10	5.37747e-09	Pphln1
ENSMUSG00000059552	3136.46	0.68201	0.108692	6.27471	3.50276e-10	5.5779e-09	Trp53
ENSMUSG00000040952	16535.1	1.33766	0.213185	6.27467	3.50375e-10	5.5779e-09	Rps19
ENSMUSG00000019814	1113.2	0.726913	0.115876	6.27321	3.53672e-10	5.62625e-09	Ltv1
ENSMUSG00000063052	708.63	0.811525	0.129378	6.27249	3.55309e-10	5.64863e-09	Lrrc40
ENSMUSG00000031131	94.621	8.98678	1.43301	6.27128	3.58085e-10	5.68908e-09	Vgll1
ENSMUSG00000023456	5283.06	1.31777	0.210228	6.26827	3.65074e-10	5.78694e-09	Tpi1
ENSMUSG00000081548	13.8782	4.94685	0.789194	6.26823	3.65186e-10	5.78694e-09	Gm11692
ENSMUSG00000022325	559.053	1.63195	0.260531	6.26392	3.75414e-10	5.92989e-09	Pop1
ENSMUSG00000052146	15806.9	1.21014	0.19326	6.26172	3.80766e-10	6.01057e-09	Rps10
ENSMUSG00000057113	20702.3	1.25056	0.199864	6.25703	3.92386e-10	6.18606e-09	Npm1
ENSMUSG00000038718	218.81	2.23443	0.357206	6.25531	3.96738e-10	6.25066e-09	Pbx3
ENSMUSG00000097971	12447.2	2.56073	0.40941	6.25467	3.98354e-10	6.26935e-09	Gm26917
ENSMUSG00000046997	292.93	2.56634	0.41031	6.25464	3.98435e-10	6.26935e-09	Spsb4
ENSMUSG00000028798	4000.33	0.876818	0.140264	6.25118	4.07358e-10	6.40566e-09	Eif3i
ENSMUSG00000011349	20.6148	7.65601	1.22519	6.24883	4.13529e-10	6.49854e-09	Dmrtc2
ENSMUSG00000061086	207.643	3.02975	0.484968	6.24733	4.17526e-10	6.55716e-09	Myl4
ENSMUSG00000048905	252.336	2.8881	0.462311	6.24708	4.18198e-10	6.56351e-09	4930539E08Rik
ENSMUSG00000035863	2414.31	1.38387	0.221533	6.24676	4.19065e-10	6.57292e-09	Palm
ENSMUSG00000104862	26.5951	1.73639	0.278013	6.24572	4.21856e-10	6.60987e-09	Gm6520
ENSMUSG00000104481	3.10411	4.61032	0.738252	6.24491	4.24032e-10	6.63813e-09	Gm38063
ENSMUSG00000026841	95.7782	5.11245	0.81894	6.24276	4.29903e-10	6.71319e-09	Fibcd1
ENSMUSG00000070953	359.401	0.783282	0.125578	6.23741	4.44877e-10	6.93794e-09	Rabepk
ENSMUSG00000022039	117.487	8.45657	1.35587	6.23699	4.46066e-10	6.95207e-09	Adam2
ENSMUSG00000034463	680.736	3.16881	0.508201	6.23535	4.50765e-10	7.02084e-09	Scara3
ENSMUSG00000016319	12074.5	0.706494	0.11331	6.23504	4.51672e-10	7.03053e-09	Slc25a5
ENSMUSG00000030598	237.884	1.60209	0.256993	6.23397	4.54746e-10	7.07389e-09	Fbxo17
ENSMUSG00000098915	716.312	1.0815	0.173525	6.23256	4.58866e-10	7.13347e-09	Rpl15-ps2
ENSMUSG00000027478	366.996	1.55106	0.248931	6.23089	4.63801e-10	7.20563e-09	Dnmt3b
ENSMUSG00000085531	42.8809	2.36186	0.379113	6.22997	4.66533e-10	7.23892e-09	Slc36a3os
ENSMUSG00000022338	1787.66	1.22257	0.196286	6.22853	4.70832e-10	7.30101e-09	Eny2
ENSMUSG00000074604	538.401	1.33788	0.214804	6.22835	4.7137e-10	7.30475e-09	Mgst2
ENSMUSG00000063543	46.8369	1.61935	0.260401	6.21866	5.01413e-10	7.75565e-09	Gm5616
ENSMUSG00000101722	59.0723	3.40759	0.547973	6.21853	5.0182e-10	7.75706e-09	Gm29125
ENSMUSG00000042515	58.5506	4.479	0.720902	6.21305	5.19645e-10	8.01245e-09	Mum1l1
ENSMUSG00000062937	991.997	1.24994	0.201219	6.21186	5.23595e-10	8.06323e-09	Mtap
ENSMUSG00000026275	1229.07	0.644309	0.103741	6.21074	5.27364e-10	8.11112e-09	Ppp1r7
ENSMUSG00000058952	24.587	3.05041	0.491389	6.20774	5.37537e-10	8.25208e-09	Cfi
ENSMUSG00000099034	56.458	1.48294	0.238909	6.20711	5.39669e-10	8.27965e-09	2810039B14Rik
ENSMUSG00000011179	2886.36	1.39336	0.224557	6.20492	5.4726e-10	8.39086e-09	Odc1
ENSMUSG00000016554	4848.46	1.0919	0.176058	6.20197	5.5761e-10	8.52828e-09	Eif3d
ENSMUSG00000041729	474.793	1.71793	0.27717	6.19812	5.71427e-10	8.72873e-09	Coro2b
ENSMUSG00000001642	3156.94	0.714317	0.115262	6.19733	5.74307e-10	8.76307e-09	Akr1b3
ENSMUSG00000061411	186.081	1.69171	0.272974	6.1973	5.74388e-10	8.76307e-09	Nol4l
ENSMUSG00000026121	473.455	1.53081	0.247271	6.19083	5.98472e-10	9.10225e-09	Sema4c
ENSMUSG00000033684	1005.67	0.984656	0.159077	6.18982	6.02325e-10	9.14953e-09	Qsox1
ENSMUSG00000061787	16927.1	1.0629	0.171789	6.18724	6.12274e-10	9.28918e-09	Rps17
ENSMUSG00000032344	183.294	1.74186	0.281579	6.18604	6.16949e-10	9.34857e-09	Mb21d1
ENSMUSG00000100441	87.9397	1.91122	0.308999	6.18519	6.20295e-10	9.39348e-09	Gm7266
ENSMUSG00000097623	71.7966	3.48978	0.564259	6.18471	6.22152e-10	9.4158e-09	B230323A14Rik
ENSMUSG00000024258	870.356	0.701984	0.113544	6.18247	6.31061e-10	9.53887e-09	Polr2d
ENSMUSG00000018171	1079.33	0.584536	0.0947447	6.16959	6.84664e-10	1.02985e-08	Vmp1
ENSMUSG00000025576	72.6684	4.94323	0.801307	6.16896	6.87398e-10	1.03333e-08	Rbfox3
ENSMUSG00000111449	13.7278	5.36401	0.870298	6.16342	7.11923e-10	1.06823e-08	AC122220,1
ENSMUSG00000048572	65.9919	2.54226	0.412703	6.16002	7.27349e-10	1.09071e-08	Tmem252
ENSMUSG00000037716	34.392	2.47136	0.401216	6.15967	7.28963e-10	1.09247e-08	Ccdc33
ENSMUSG00000097057	10.5865	2.31386	0.375964	6.15447	7.5331e-10	1.12689e-08	Gm17638
ENSMUSG00000068739	2627.56	0.778559	0.126507	6.15427	7.54264e-10	1.12763e-08	Sars
ENSMUSG00000026923	14045.4	2.71311	0.440971	6.15258	7.62302e-10	1.13827e-08	Notch1
ENSMUSG00000012848	19032.4	1.11927	0.181931	6.15215	7.64394e-10	1.1407e-08	Rps5
ENSMUSG00000034022	3405.31	1.00743	0.163795	6.15058	7.72003e-10	1.15135e-08	Cpsf1
ENSMUSG00000033909	1096.46	0.582466	0.0947502	6.14738	7.87709e-10	1.17264e-08	Usp36
ENSMUSG00000032815	701.21	1.39302	0.226731	6.14392	8.05086e-10	1.19778e-08	Fanca
ENSMUSG00000074652	56.0741	2.84255	0.462742	6.14284	8.10601e-10	1.20453e-08	Myh7b
ENSMUSG00000027714	729.098	0.651233	0.106031	6.14192	8.15323e-10	1.21082e-08	Exosc9
ENSMUSG00000029777	3251.43	1.01849	0.165909	6.13887	8.31113e-10	1.23278e-08	Gars
ENSMUSG00000042354	2158.43	1.32569	0.215975	6.13817	8.3477e-10	1.23631e-08	Gnl3
ENSMUSG00000024034	32.3663	2.95158	0.48086	6.13813	8.35003e-10	1.23631e-08	Tmprss3
ENSMUSG00000001909	1053.02	0.85844	0.139995	6.13194	8.68122e-10	1.28071e-08	Trmt1
ENSMUSG00000023026	1542.86	0.728817	0.118928	6.12822	8.88685e-10	1.30869e-08	Dip2b
ENSMUSG00000041841	12389.4	1.83065	0.298878	6.12507	9.06455e-10	1.33247e-08	Rpl37
ENSMUSG00000097772	194.291	0.872376	0.142459	6.12369	9.14307e-10	1.34321e-08	5430416N02Rik
ENSMUSG00000063600	33.7184	6.62319	1.08232	6.11944	9.39049e-10	1.37709e-08	Egfem1
ENSMUSG00000028152	567.618	0.810649	0.132527	6.11685	9.54427e-10	1.3965e-08	Tspan5
ENSMUSG00000073702	16200.2	1.17696	0.192413	6.11683	9.54561e-10	1.3965e-08	Rpl31
ENSMUSG00000026615	3396.45	0.797213	0.130357	6.11562	9.61849e-10	1.40633e-08	Eprs
ENSMUSG00000052395	342.538	0.747261	0.122207	6.1147	9.67361e-10	1.41354e-08	Rft1
ENSMUSG00000037683	38.6569	2.86856	0.469316	6.11222	9.82572e-10	1.43321e-08	Armc3
ENSMUSG00000108414	1619.64	1.22263	0.200046	6.11176	9.854e-10	1.43649e-08	Snhg1
ENSMUSG00000027551	850.822	0.899234	0.147169	6.1102	9.95056e-10	1.44884e-08	Zfp64
ENSMUSG00000029089	221.872	0.721643	0.118119	6.10946	9.99671e-10	1.45384e-08	5730480H06Rik
ENSMUSG00000059070	13762.8	1.20499	0.197284	6.10793	1.00932e-09	1.46614e-08	Rpl18
ENSMUSG00000020869	2689.19	0.620462	0.101615	6.10598	1.02172e-09	1.48167e-08	Lrrc59
ENSMUSG00000062647	18096.1	1.0838	0.177502	6.10587	1.02243e-09	1.48167e-08	Rpl7a
ENSMUSG00000015966	1174.98	1.78239	0.291913	6.1059	1.02226e-09	1.48167e-08	Il17rb
ENSMUSG00000022241	2272.38	1.05782	0.173269	6.10506	1.02763e-09	1.48746e-08	Tars
ENSMUSG00000081865	1240.34	1.17807	0.193007	6.10377	1.03594e-09	1.49861e-08	Gm15484
ENSMUSG00000025264	606.275	0.748468	0.122718	6.09907	1.06687e-09	1.53972e-08	Tsr2
ENSMUSG00000001569	1073.12	0.535822	0.087866	6.09817	1.07291e-09	1.54626e-08	Nom1
ENSMUSG00000025047	1217.47	0.580571	0.0952051	6.09811	1.07329e-09	1.54626e-08	Pdcd11
ENSMUSG00000003355	62.0921	3.08185	0.505598	6.09545	1.09127e-09	1.56758e-08	Fkbp11
ENSMUSG00000024312	749.368	0.755409	0.123945	6.09469	1.09653e-09	1.57421e-08	Wdr46
ENSMUSG00000021810	1424.15	0.6051	0.0992865	6.09448	1.09793e-09	1.57531e-08	Ecd
ENSMUSG00000113036	106.059	1.03222	0.169469	6.09093	1.12254e-09	1.60722e-08	AC139941,1
ENSMUSG00000091449	227.701	2.21218	0.363195	6.0909	1.12279e-09	1.60722e-08	Gm10269
ENSMUSG00000078812	20237.4	1.29049	0.211889	6.09042	1.12613e-09	1.61106e-08	Eif5a
ENSMUSG00000006589	1138.44	1.65119	0.271214	6.08815	1.14221e-09	1.63217e-08	Aprt
ENSMUSG00000063522	103.977	2.18186	0.358795	6.08107	1.19381e-09	1.70381e-08	2010109I03Rik
ENSMUSG00000053768	5339.24	1.21512	0.199912	6.07826	1.21494e-09	1.73106e-08	Chchd3
ENSMUSG00000067629	170.661	1.90393	0.313424	6.0746	1.24294e-09	1.76584e-08	Syngap1
ENSMUSG00000100228	80.7241	2.62746	0.43255	6.07435	1.24494e-09	1.76766e-08	Gm29257
ENSMUSG00000027597	1000.68	1.18486	0.195117	6.07258	1.25869e-09	1.78512e-08	Ahcy
ENSMUSG00000057696	185.485	2.29228	0.377498	6.07229	1.26096e-09	1.78731e-08	Rpl30-ps1
ENSMUSG00000034634	5308.61	3.23652	0.533535	6.06618	1.3099e-09	1.85133e-08	Ly6d
ENSMUSG00000045411	964.921	0.781749	0.128926	6.06353	1.33167e-09	1.88102e-08	2410002F23Rik
ENSMUSG00000022449	187.798	4.64503	0.766217	6.0623	1.3419e-09	1.89221e-08	Adamts20
ENSMUSG00000098234	458.567	1.48321	0.24489	6.05665	1.38984e-09	1.95421e-08	Snhg6
ENSMUSG00000104913	458.065	2.00899	0.331918	6.05266	1.42474e-09	1.99985e-08	Gm6560
ENSMUSG00000058546	16932.5	1.13082	0.186846	6.05215	1.42921e-09	2.00497e-08	Rpl23a
ENSMUSG00000019478	231.863	1.38474	0.228852	6.05081	1.44115e-09	2.01942e-08	Rab4a
ENSMUSG00000039824	97.7056	1.70803	0.282341	6.04953	1.45268e-09	2.03442e-08	Myl6b
ENSMUSG00000068039	7580.29	0.872053	0.144158	6.04927	1.45505e-09	2.03657e-08	Tcp1
ENSMUSG00000026572	172.039	2.26545	0.374689	6.04622	1.48279e-09	2.07304e-08	Tbx19
ENSMUSG00000079435	7218.64	1.16557	0.192866	6.04341	1.50894e-09	2.10721e-08	Rpl36a
ENSMUSG00000041506	819.423	1.06459	0.17627	6.03954	1.5455e-09	2.1558e-08	Rrp9
ENSMUSG00000033228	4235.25	0.782846	0.129655	6.03793	1.56103e-09	2.17623e-08	Scaf11
ENSMUSG00000099719	12.9548	4.26233	0.706683	6.03146	1.62485e-09	2.25752e-08	Gm28802
ENSMUSG00000109324	4241.01	1.15918	0.192199	6.03112	1.62824e-09	2.26096e-08	Prmt1
ENSMUSG00000035325	2093.7	0.372171	0.061717	6.03028	1.63676e-09	2.2715e-08	Sec31a
ENSMUSG00000027215	3339.29	1.76324	0.292446	6.02926	1.64711e-09	2.28457e-08	Cd82
ENSMUSG00000027642	4043.7	0.660772	0.109615	6.02809	1.65904e-09	2.29853e-08	Rpn2
ENSMUSG00000071303	51.7245	2.6189	0.434651	6.02531	1.68789e-09	2.33719e-08	Rps8-ps1
ENSMUSG00000061315	12629.9	0.859787	0.142796	6.0211	1.73238e-09	2.39608e-08	Naca
ENSMUSG00000083914	235.743	1.68173	0.279491	6.01713	1.77536e-09	2.45415e-08	Rps18-ps1
ENSMUSG00000102135	767.869	1.8377	0.305524	6.01492	1.79971e-09	2.48501e-08	Gm37108
ENSMUSG00000090260	5.70562	3.61011	0.600259	6.01425	1.80721e-09	2.49397e-08	2810442N19Rik
ENSMUSG00000105993	19.6599	2.58018	0.429074	6.01336	1.81712e-09	2.50624e-08	Tex13c2
ENSMUSG00000021314	132.968	4.37338	0.727413	6.01223	1.82984e-09	2.52237e-08	Amph
ENSMUSG00000086322	4.15154	4.75132	0.790359	6.0116	1.83705e-09	2.52806e-08	E130218I03Rik
ENSMUSG00000075229	448.88	0.898431	0.149665	6.00293	1.93785e-09	2.65635e-08	Ccdc58
ENSMUSG00000025290	30182.6	1.20418	0.200614	6.00246	1.94354e-09	2.66267e-08	Rps24
ENSMUSG00000001131	184.697	2.53015	0.421665	6.00038	1.96854e-09	2.69391e-08	Timp1
ENSMUSG00000023030	689.537	1.29023	0.215103	5.99821	1.99507e-09	2.7287e-08	Slc11a2
ENSMUSG00000087230	21.0057	5.95589	0.99339	5.99552	2.02833e-09	2.77265e-08	Mroh3
ENSMUSG00000037161	14.7927	3.47029	0.579026	5.99332	2.05603e-09	2.80739e-08	Mgarp
ENSMUSG00000014959	2072.99	0.547547	0.0915879	5.97837	2.25381e-09	3.06214e-08	Gorasp2
ENSMUSG00000022938	12.4025	3.1954	0.534635	5.97679	2.27581e-09	3.08862e-08	Fam3b
ENSMUSG00000021895	1417.17	0.941999	0.157695	5.97354	2.3216e-09	3.14382e-08	Arhgef3
ENSMUSG00000022685	1007.37	0.71362	0.119519	5.97078	2.36117e-09	3.19564e-08	Parn
ENSMUSG00000048758	1146.69	1.13785	0.190681	5.96731	2.41194e-09	3.26256e-08	Rpl29
ENSMUSG00000083411	53.8651	2.23587	0.374811	5.96532	2.44152e-09	3.29713e-08	Rpl30-ps10
ENSMUSG00000026356	2461.9	0.817779	0.137113	5.96426	2.45741e-09	3.31676e-08	Dars
ENSMUSG00000024571	2213.01	0.767415	0.128678	5.96386	2.46344e-09	3.32308e-08	Gm16286
ENSMUSG00000114551	48.6966	2.19924	0.368935	5.96107	2.50593e-09	3.37668e-08	CT025555,1
ENSMUSG00000016526	81.9065	1.96813	0.330171	5.96093	2.50809e-09	3.37775e-08	Dyrk3
ENSMUSG00000023992	227.761	2.75151	0.461761	5.95874	2.54193e-09	3.41957e-08	Trem2
ENSMUSG00000012889	739.12	1.96398	0.329694	5.95699	2.56923e-09	3.45252e-08	Podnl1
ENSMUSG00000075268	120.157	0.683472	0.114828	5.95214	2.6466e-09	3.54873e-08	Gm10819
ENSMUSG00000078193	390.245	1.47337	0.247805	5.9457	2.75273e-09	3.685e-08	Gm2000
ENSMUSG00000004264	4492.7	1.03115	0.173442	5.94523	2.76064e-09	3.69358e-08	Phb2
ENSMUSG00000026204	200.389	2.44888	0.412102	5.94242	2.80846e-09	3.75347e-08	Ptprn
ENSMUSG00000048007	228.693	1.17255	0.197443	5.93867	2.87346e-09	3.83826e-08	Timm8a1
ENSMUSG00000074813	69.8304	2.45448	0.413389	5.93747	2.89455e-09	3.86418e-08	Gm14005
ENSMUSG00000091401	12.9664	2.46119	0.414524	5.93739	2.89601e-09	3.86418e-08	Gm9252
ENSMUSG00000060198	139.285	2.32785	0.39211	5.93674	2.90751e-09	3.87742e-08	Gm11353
ENSMUSG00000087590	268.999	1.39654	0.235548	5.92891	3.04958e-09	4.05368e-08	Epb41l4aos
ENSMUSG00000046441	206.718	0.782271	0.131992	5.92667	3.09143e-09	4.10487e-08	Cmtr2
ENSMUSG00000063445	827.635	1.38207	0.233438	5.92051	3.20945e-09	4.25009e-08	Nmral1
ENSMUSG00000068604	15.8221	1.39186	0.235195	5.91791	3.26065e-09	4.31326e-08	Gm8225
ENSMUSG00000016946	761.232	0.610405	0.103194	5.91513	3.31606e-09	4.38419e-08	Kctd5
ENSMUSG00000053091	282.359	0.833855	0.141001	5.91384	3.34224e-09	4.41643e-08	Lins1
ENSMUSG00000021650	808.198	0.551849	0.0933173	5.91368	3.34541e-09	4.41824e-08	Ptcd2
ENSMUSG00000105854	112.031	1.99263	0.337144	5.91032	3.41445e-09	4.49975e-08	Gm8925
ENSMUSG00000026799	586.912	0.665793	0.112656	5.90996	3.422e-09	4.50728e-08	Med27
ENSMUSG00000091695	1877.67	1.1752	0.198857	5.9098	3.42514e-09	4.50901e-08	Gm17669
ENSMUSG00000078192	79.125	2.4963	0.422529	5.90798	3.46318e-09	4.55421e-08	Gm7290
ENSMUSG00000035429	11.0357	3.8905	0.659104	5.90272	3.57559e-09	4.68948e-08	Ptprh
ENSMUSG00000010154	108.011	1.74722	0.29608	5.90118	3.60921e-09	4.73105e-08	Spire2
ENSMUSG00000027220	3282.62	1.49723	0.253804	5.89916	3.65346e-09	4.7814e-08	Syt13
ENSMUSG00000078154	798.343	0.959133	0.16265	5.89693	3.70332e-09	4.8415e-08	Gm12184
ENSMUSG00000018040	2054.06	1.03989	0.176411	5.8947	3.75373e-09	4.9048e-08	Rrp7a
ENSMUSG00000110126	65.3688	2.14946	0.364827	5.89171	3.82225e-09	4.99167e-08	Gm9347
ENSMUSG00000084215	46.0061	1.35251	0.229592	5.89094	3.84008e-09	5.0123e-08	Gm11814
ENSMUSG00000031762	507.404	2.6938	0.457372	5.88973	3.86833e-09	5.04382e-08	Mt2
ENSMUSG00000024901	44.3761	1.94961	0.331137	5.88764	3.91751e-09	5.10523e-08	Peli3
ENSMUSG00000054309	1501.54	0.650268	0.11048	5.88582	3.96093e-09	5.15908e-08	Cpsf3
ENSMUSG00000030144	23.1411	2.36176	0.401419	5.88353	4.01603e-09	5.22807e-08	Clec4d
ENSMUSG00000021927	102.22	1.8465	0.314062	5.87939	4.1178e-09	5.35205e-08	Hnrnpa1l2-ps2
ENSMUSG00000028010	930.65	1.19948	0.204028	5.87901	4.12727e-09	5.36153e-08	Gar1
ENSMUSG00000100922	24.1579	2.14667	0.365214	5.87784	4.15651e-09	5.3938e-08	Gm8520
ENSMUSG00000029478	2800.4	0.803312	0.136709	5.87608	4.20108e-09	5.44015e-08	Ncor2
ENSMUSG00000033740	30.6439	3.05338	0.519891	5.87311	4.27697e-09	5.52969e-08	St18
ENSMUSG00000021079	656.145	1.08273	0.184455	5.86987	4.36145e-09	5.63595e-08	Timm9
ENSMUSG00000031661	361.499	3.62437	0.617493	5.86948	4.37154e-09	5.64602e-08	Nkd1
ENSMUSG00000086841	1391.7	1.19113	0.202952	5.86903	4.3834e-09	5.65836e-08	2410006H16Rik
ENSMUSG00000006057	2328.21	1.29765	0.221169	5.86722	4.43168e-09	5.71768e-08	Atp5g1
ENSMUSG00000094955	157.014	1.87403	0.31947	5.86606	4.46274e-09	5.75473e-08	Gm3699
ENSMUSG00000024436	390.714	0.882101	0.150504	5.861	4.60099e-09	5.92058e-08	Mrps18b
ENSMUSG00000015671	4777.95	0.798187	0.136242	5.85859	4.66803e-09	6.0037e-08	Psma2
ENSMUSG00000061979	650.319	1.2006	0.204993	5.8568	4.71878e-09	6.06581e-08	Rcc1l
ENSMUSG00000025821	641.816	0.744008	0.127179	5.85009	4.91293e-09	6.3022e-08	Zfp282
ENSMUSG00000030876	1308.14	0.614116	0.10499	5.84928	4.93704e-09	6.32982e-08	Mettl9
ENSMUSG00000026784	249.03	1.13327	0.193812	5.84723	4.99826e-09	6.40163e-08	Pdss1
ENSMUSG00000076755	524.042	3.35877	0.574806	5.84331	5.11737e-09	6.54395e-08	Gm16602
ENSMUSG00000022842	269.638	0.992533	0.169924	5.84104	5.18752e-09	6.62331e-08	Ece2
ENSMUSG00000033581	190.246	1.65551	0.283519	5.83914	5.24698e-09	6.69229e-08	Igf2bp2
ENSMUSG00000112023	97.0416	2.43395	0.417356	5.83184	5.48198e-09	6.96311e-08	Lilr4b
ENSMUSG00000026174	2466.79	0.806942	0.138495	5.82649	5.66046e-09	7.17868e-08	Cnot9
ENSMUSG00000021773	183.414	0.994569	0.170734	5.82525	5.70274e-09	7.22856e-08	Comtd1
ENSMUSG00000098713	31.2479	2.2864	0.392561	5.82433	5.73427e-09	7.26479e-08	Rps2-ps5
ENSMUSG00000031029	6495.37	0.881664	0.151428	5.82234	5.80286e-09	7.34789e-08	Eif3f
ENSMUSG00000057561	1139.14	0.687954	0.118167	5.82186	5.81958e-09	7.36527e-08	Eif1a
ENSMUSG00000033855	561.28	2.29816	0.394814	5.82087	5.85437e-09	7.40549e-08	Ston1
ENSMUSG00000022528	355.881	2.10558	0.361785	5.81999	5.88518e-09	7.44064e-08	Hes1
ENSMUSG00000063328	150.435	2.14515	0.3686	5.81973	5.89437e-09	7.44842e-08	Gm9396
ENSMUSG00000022404	1326.67	0.663261	0.114041	5.816	6.02716e-09	7.61231e-08	Slc25a17
ENSMUSG00000078789	186.068	0.973463	0.167403	5.81509	6.05997e-09	7.64982e-08	Dph1
ENSMUSG00000049307	219.628	2.59175	0.445713	5.81483	6.06941e-09	7.65781e-08	Fut4
ENSMUSG00000062006	5825.92	1.03907	0.17871	5.81427	6.08983e-09	7.67962e-08	Rpl34
ENSMUSG00000024891	61.417	1.16538	0.200553	5.81081	6.21713e-09	7.82009e-08	Slc29a2
ENSMUSG00000082419	254.323	2.01266	0.34641	5.81005	6.24544e-09	7.84767e-08	Gm11425
ENSMUSG00000040675	1485.64	1.12441	0.193718	5.80435	6.4615e-09	8.10256e-08	Mthfd1l
ENSMUSG00000061143	251.794	1.91537	0.329994	5.80427	6.46478e-09	8.10256e-08	Maml3
ENSMUSG00000016529	49.9455	4.78989	0.825481	5.80255	6.53149e-09	8.18201e-08	Il10
ENSMUSG00000024529	339.916	2.66917	0.460117	5.80105	6.58993e-09	8.24261e-08	Lox
ENSMUSG00000084216	22.6844	1.69761	0.292665	5.8005	6.61183e-09	8.2629e-08	Gm7973
ENSMUSG00000075225	493.362	1.53074	0.263975	5.79882	6.67851e-09	8.33221e-08	Ccdc162
ENSMUSG00000063316	9480.54	1.20241	0.207412	5.79719	6.74336e-09	8.40032e-08	Rpl27
ENSMUSG00000022827	225.927	0.842234	0.1453	5.79653	6.77012e-09	8.42511e-08	Rabl3
ENSMUSG00000055817	957.042	0.833164	0.143758	5.79559	6.8082e-09	8.46821e-08	Mta3
ENSMUSG00000026047	333.197	1.01874	0.175783	5.79544	6.81412e-09	8.47129e-08	Kdelc1
ENSMUSG00000015023	1173.59	0.669032	0.115469	5.79403	6.87162e-09	8.52983e-08	Ddx19a
ENSMUSG00000101641	6.85522	4.57496	0.789618	5.79388	6.87767e-09	8.53303e-08	Gm29560
ENSMUSG00000022350	1594.09	0.639602	0.11048	5.78929	7.06853e-09	8.76099e-08	Washc5
ENSMUSG00000068922	506.893	0.739519	0.127743	5.78912	7.07568e-09	8.76543e-08	Msto1
ENSMUSG00000086975	25.0049	2.85346	0.492994	5.78803	7.12169e-09	8.81354e-08	Gm15208
ENSMUSG00000016024	162.55	2.21798	0.383231	5.78757	7.14135e-09	8.83342e-08	Lbp
ENSMUSG00000029617	1632.85	0.523357	0.0904524	5.786	7.20843e-09	8.90296e-08	Ccz1
ENSMUSG00000044055	49.8185	2.07835	0.359339	5.78382	7.30248e-09	9.01006e-08	Otos
ENSMUSG00000087668	12.1128	4.43169	0.766513	5.78162	7.3985e-09	9.12395e-08	Gm11186
ENSMUSG00000057421	1481.78	0.825352	0.142775	5.7808	7.43443e-09	9.16366e-08	Las1l
ENSMUSG00000048439	155.431	0.806324	0.139493	5.78037	7.45348e-09	9.18253e-08	Nupl2
ENSMUSG00000030814	1461.24	1.02682	0.177707	5.77818	7.55134e-09	9.29378e-08	Bcl7c
ENSMUSG00000102224	22.3661	1.75303	0.30341	5.77776	7.56997e-09	9.31204e-08	4930447F24Rik
ENSMUSG00000031595	48.0529	2.18952	0.379144	5.77491	7.69933e-09	9.45226e-08	Pdgfrl
ENSMUSG00000059751	10964.8	1.0453	0.18102	5.77449	7.71852e-09	9.47109e-08	Rps3a3
ENSMUSG00000029610	651.058	1.21147	0.209922	5.77103	7.87881e-09	9.65813e-08	Aimp2
ENSMUSG00000107092	542.558	1.58244	0.274203	5.77107	7.87684e-09	9.65813e-08	Gm7993
ENSMUSG00000022255	3002.71	0.982026	0.170422	5.76231	8.29719e-09	1.01598e-07	Mtdh
ENSMUSG00000104699	260.91	1.73733	0.301502	5.76224	8.30045e-09	1.01598e-07	Rps4x-ps
ENSMUSG00000020534	1215.18	1.33928	0.232522	5.7598	8.42122e-09	1.02973e-07	Shmt1
ENSMUSG00000028033	157.869	1.62453	0.282155	5.75757	8.53318e-09	1.04187e-07	Kcnq5
ENSMUSG00000019808	294.034	0.753247	0.130916	5.75368	8.73204e-09	1.06456e-07	Adat2
ENSMUSG00000025995	1124.99	0.82583	0.143573	5.75197	8.82091e-09	1.07433e-07	Wdr75
ENSMUSG00000005718	360.059	1.11576	0.194044	5.75	8.92417e-09	1.08637e-07	Tfap4
ENSMUSG00000020412	1201.67	0.597651	0.103942	5.74986	8.93152e-09	1.08673e-07	Ascc2
ENSMUSG00000049130	48.8798	2.83356	0.492866	5.74914	8.96963e-09	1.09028e-07	C5ar1
ENSMUSG00000000339	850.027	0.703209	0.122387	5.74578	9.14987e-09	1.11109e-07	Rtca
ENSMUSG00000028857	1190.66	0.633396	0.110249	5.74513	9.18518e-09	1.11483e-07	Tmem222
ENSMUSG00000003882	1404.57	1.48765	0.25897	5.74448	9.22015e-09	1.11797e-07	Il7r
ENSMUSG00000033020	1352.1	1.90154	0.331048	5.744	9.24637e-09	1.1206e-07	Polr2f
ENSMUSG00000029388	1028.82	0.588293	0.102537	5.73739	9.61475e-09	1.16409e-07	Eif2b1
ENSMUSG00000096255	668.181	0.73836	0.128761	5.73435	9.78859e-09	1.18339e-07	Dynlt1b
ENSMUSG00000071745	5.08168	4.13686	0.721576	5.73309	9.86175e-09	1.19165e-07	DXBay18
ENSMUSG00000027198	1333.36	0.600262	0.104705	5.73286	9.87519e-09	1.19269e-07	Ext2
ENSMUSG00000070576	330.887	3.68484	0.642984	5.73084	9.99331e-09	1.20577e-07	Mn1
ENSMUSG00000057322	7138.22	1.6047	0.280044	5.73018	1.00325e-08	1.20991e-07	Rpl38
ENSMUSG00000029036	1305.09	1.07461	0.187633	5.7272	1.02104e-08	1.23076e-07	Atad3a
ENSMUSG00000033554	351.058	0.706233	0.123341	5.72587	1.02905e-08	1.23943e-07	Dph5
ENSMUSG00000080198	145.293	1.93024	0.337111	5.72584	1.02925e-08	1.23943e-07	Gm13573
ENSMUSG00000059658	21.9161	2.36438	0.413216	5.72189	1.05346e-08	1.26735e-07	Gm16379
ENSMUSG00000008683	14912.6	1.06308	0.185798	5.7217	1.05461e-08	1.26812e-07	Rps15a
ENSMUSG00000025008	138.914	0.640192	0.111912	5.72051	1.06204e-08	1.27642e-07	Tctn3
ENSMUSG00000060636	9640.65	1.15981	0.202839	5.7179	1.07846e-08	1.29552e-07	Rpl35a
ENSMUSG00000084131	219.848	1.84676	0.323246	5.71318	1.10886e-08	1.33073e-07	Rpl3-ps2
ENSMUSG00000032485	2035.6	0.46771	0.0818663	5.71309	1.10943e-08	1.33077e-07	Scap
ENSMUSG00000037601	1239.64	1.67129	0.292875	5.7065	1.15324e-08	1.37861e-07	Nme1
ENSMUSG00000100405	137.587	2.73896	0.481008	5.69421	1.23944e-08	1.47592e-07	Gm28911
ENSMUSG00000062867	4086.37	1.24806	0.219264	5.69205	1.25523e-08	1.49399e-07	Impdh2
ENSMUSG00000020267	4283.33	1.45991	0.256486	5.69195	1.25596e-08	1.49414e-07	Hint1
ENSMUSG00000004100	1235.5	1.32241	0.232355	5.69134	1.26048e-08	1.49871e-07	Ppan
ENSMUSG00000034667	1529.9	0.832177	0.146242	5.6904	1.26741e-08	1.5034e-07	Xpot
ENSMUSG00000026520	2292.97	1.67602	0.294624	5.68868	1.28027e-08	1.51709e-07	Pycr2
ENSMUSG00000112908	236.266	2.26578	0.39833	5.6882	1.28386e-08	1.5194e-07	AC126687,1
ENSMUSG00000069020	798.021	0.660674	0.116198	5.68574	1.30245e-08	1.53902e-07	Urm1
ENSMUSG00000111060	6.56645	5.70635	1.00361	5.68582	1.30184e-08	1.53902e-07	AC151971,4
ENSMUSG00000024767	1745.55	0.760077	0.133706	5.68467	1.31065e-08	1.54796e-07	Otub1
ENSMUSG00000046721	808.458	1.5032	0.264502	5.68313	1.32249e-08	1.56045e-07	Rpl14-ps1
ENSMUSG00000052384	1851.86	0.764104	0.134474	5.68218	1.32989e-08	1.56768e-07	Nrros
ENSMUSG00000063001	42.5244	2.35504	0.414493	5.68173	1.33342e-08	1.57033e-07	Gm9701
ENSMUSG00000020328	1061.18	0.863262	0.151974	5.68033	1.34436e-08	1.5817e-07	Nudcd2
ENSMUSG00000029468	328.074	1.75898	0.309708	5.67948	1.35106e-08	1.58821e-07	P2rx7
ENSMUSG00000040945	10801.2	0.963689	0.169752	5.67703	1.37056e-08	1.60791e-07	Rcc2
ENSMUSG00000031917	875.271	0.816434	0.143944	5.67189	1.41232e-08	1.65374e-07	Nip7
ENSMUSG00000025869	670.337	1.14525	0.202085	5.66716	1.45183e-08	1.69678e-07	Nop16
ENSMUSG00000053553	235.083	1.56563	0.276414	5.66408	1.47819e-08	1.72675e-07	3110082I17Rik
ENSMUSG00000096474	54.8899	2.11225	0.37293	5.66394	1.47932e-08	1.72726e-07	Gm5561
ENSMUSG00000102941	63.7167	2.38474	0.421047	5.66383	1.48035e-08	1.72764e-07	Gm37552
ENSMUSG00000100680	48.0824	1.67591	0.295979	5.66224	1.49406e-08	1.74281e-07	1810044D09Rik
ENSMUSG00000039828	676.06	0.886731	0.156675	5.65968	1.51651e-08	1.76816e-07	Wdr70
ENSMUSG00000034263	1328.28	0.481862	0.0851556	5.65861	1.52605e-08	1.7776e-07	Ints14
ENSMUSG00000069631	619.307	0.703349	0.124315	5.65778	1.53342e-08	1.78533e-07	Strada
ENSMUSG00000112895	19.0112	2.42263	0.428663	5.65159	1.58972e-08	1.84825e-07	AC122317,3
ENSMUSG00000085241	146.031	1.39583	0.247047	5.65008	1.60372e-08	1.86277e-07	Snhg3
ENSMUSG00000106379	83.2234	3.59341	0.63603	5.64974	1.60692e-08	1.8656e-07	Lhfpl3
ENSMUSG00000076757	2378.37	2.84284	0.503215	5.64935	1.61053e-08	1.86892e-07	Tcrg-C4
ENSMUSG00000032498	417.197	0.73626	0.130417	5.64545	1.64753e-08	1.90916e-07	Mlh1
ENSMUSG00000061024	848.06	0.987042	0.174887	5.64387	1.66267e-08	1.92488e-07	Rrs1
ENSMUSG00000041355	2642.7	0.839791	0.148865	5.64128	1.68789e-08	1.95186e-07	Ssr2
ENSMUSG00000056209	2138.3	1.11797	0.198179	5.64123	1.68836e-08	1.95186e-07	Npm3
ENSMUSG00000005686	430.903	2.34268	0.415475	5.63856	1.71475e-08	1.97865e-07	Ampd3
ENSMUSG00000083011	113.561	2.26101	0.401068	5.63747	1.72562e-08	1.98932e-07	Gm12816
ENSMUSG00000060073	2860.78	0.667762	0.118491	5.63556	1.74493e-08	2.01064e-07	Psma3
ENSMUSG00000050891	204.404	0.934533	0.165851	5.63478	1.75286e-08	2.01789e-07	Tatdn1
ENSMUSG00000024740	8445.41	0.47468	0.0842465	5.63441	1.75656e-08	2.02025e-07	Ddb1
ENSMUSG00000096094	11.0134	2.96886	0.5272	5.63138	1.78776e-08	2.05325e-07	A630095N17Rik
ENSMUSG00000010095	2533.23	0.814082	0.144705	5.62581	1.84645e-08	2.1167e-07	Slc3a2
ENSMUSG00000035295	57.6924	1.80435	0.32082	5.62417	1.86399e-08	2.13581e-07	Wdr38
ENSMUSG00000061330	143.938	2.20191	0.391797	5.62004	1.90911e-08	2.18242e-07	Gm11361
ENSMUSG00000043987	1290.47	1.03393	0.184017	5.61869	1.92407e-08	2.19851e-07	Cep164
ENSMUSG00000056665	2875.71	1.45344	0.258687	5.61853	1.92585e-08	2.19951e-07	Them6
ENSMUSG00000081400	382.058	1.37803	0.245376	5.61597	1.95461e-08	2.22822e-07	Gm13680
ENSMUSG00000056612	4855.72	1.15483	0.205643	5.61571	1.95762e-08	2.23062e-07	Ppp1r14b
ENSMUSG00000044303	74.451	3.12585	0.556841	5.61354	1.98228e-08	2.2562e-07	Cdkn2a
ENSMUSG00000045128	19643.1	1.08227	0.192878	5.61116	2.00972e-08	2.28574e-07	Rpl18a
ENSMUSG00000038383	623.978	0.519105	0.0925617	5.6082	2.04441e-08	2.32268e-07	Pigu
ENSMUSG00000057657	59.9385	2.39032	0.426229	5.60807	2.04597e-08	2.32268e-07	Rps18-ps3
ENSMUSG00000026864	7728.76	0.485596	0.0866012	5.60727	2.05539e-08	2.33229e-07	Hspa5
ENSMUSG00000059291	16633.7	1.00597	0.179426	5.60658	2.06361e-08	2.34053e-07	Rpl11
ENSMUSG00000083326	137.19	2.2537	0.402241	5.60286	2.10846e-08	2.3881e-07	Rpl38-ps1
ENSMUSG00000034544	688.617	0.522829	0.0933496	5.60076	2.13415e-08	2.41497e-07	Rsrc1
ENSMUSG00000061479	2241.5	1.0825	0.193277	5.60078	2.13389e-08	2.41497e-07	Snrpa
ENSMUSG00000114241	11.0454	2.20463	0.393661	5.60032	2.13955e-08	2.41996e-07	AC121599,1
ENSMUSG00000081740	122.267	2.17159	0.387899	5.59835	2.16407e-08	2.44433e-07	Gm14279
ENSMUSG00000028936	7779.62	1.12523	0.201039	5.59707	2.18006e-08	2.45988e-07	Rpl22
ENSMUSG00000097129	9.78556	1.84298	0.329455	5.59404	2.21847e-08	2.49773e-07	4930507D05Rik
ENSMUSG00000114003	638.381	1.09211	0.195275	5.59268	2.23586e-08	2.51616e-07	AC124744,2
ENSMUSG00000025508	15369.5	1.2481	0.223219	5.59139	2.25254e-08	2.53261e-07	Rplp2
ENSMUSG00000036678	1668.97	1.25577	0.224604	5.59106	2.2569e-08	2.53635e-07	Aaas
ENSMUSG00000100351	63.6624	2.83544	0.507155	5.59088	2.25928e-08	2.53787e-07	Gm7867
ENSMUSG00000039768	1361.34	0.654071	0.117004	5.59017	2.26844e-08	2.54699e-07	Dnajc11
ENSMUSG00000021702	146.337	3.19309	0.571407	5.58811	2.2955e-08	2.57502e-07	Thbs4
ENSMUSG00000024644	1508.96	1.02811	0.184258	5.57973	2.40896e-08	2.69984e-07	Cndp2
ENSMUSG00000029847	305.312	2.24279	0.402009	5.57895	2.41974e-08	2.71068e-07	Slc23a4
ENSMUSG00000071532	122.079	2.1121	0.3786	5.57871	2.42309e-08	2.7132e-07	Gm10335
ENSMUSG00000068749	2414.82	0.711643	0.127626	5.576	2.46117e-08	2.75333e-07	Psma5
ENSMUSG00000057789	1747.04	0.720999	0.129323	5.57517	2.47286e-08	2.7639e-07	Bak1
ENSMUSG00000037949	866.04	1.08602	0.194832	5.57414	2.48759e-08	2.77909e-07	Ano10
ENSMUSG00000027655	533.04	0.720745	0.129313	5.57363	2.49479e-08	2.78587e-07	Dhx35
ENSMUSG00000081431	94.3337	2.08844	0.374824	5.5718	2.52123e-08	2.81284e-07	Gm15483
ENSMUSG00000086752	15.8518	2.83426	0.50879	5.57058	2.53896e-08	2.83004e-07	Gm11674
ENSMUSG00000014771	706.675	0.656425	0.117986	5.56359	2.64284e-08	2.93918e-07	Pdcd2
ENSMUSG00000078377	116.976	1.84861	0.332409	5.56126	2.67832e-08	2.97326e-07	Gm4294
ENSMUSG00000022474	1269.47	1.28454	0.231185	5.55632	2.75528e-08	3.05567e-07	Pmm1
ENSMUSG00000025439	2475.82	0.738137	0.13287	5.55534	2.77073e-08	3.0689e-07	Clns1a
ENSMUSG00000039221	2140.62	0.835524	0.150455	5.55332	2.80289e-08	3.10313e-07	Rpl22l1
ENSMUSG00000069049	403.928	11.7771	2.12081	5.5531	2.80647e-08	3.10429e-07	Eif2s3y
ENSMUSG00000043716	25736.6	0.844955	0.152317	5.54733	2.90057e-08	3.19974e-07	Rpl7
ENSMUSG00000038628	932.594	0.50098	0.0903729	5.54348	2.96514e-08	3.26219e-07	Polr3k
ENSMUSG00000082476	40.3328	2.25983	0.407801	5.54149	2.99908e-08	3.2951e-07	Gm12242
ENSMUSG00000021751	43.452	3.52351	0.636043	5.53974	3.02917e-08	3.32519e-07	Acox2
ENSMUSG00000030423	947.028	0.629761	0.113697	5.53895	3.04291e-08	3.33878e-07	Pop4
ENSMUSG00000044609	285.442	1.38213	0.249565	5.53815	3.05676e-08	3.35098e-07	Gm9294
ENSMUSG00000091556	38.8034	6.43965	1.16323	5.53601	3.09443e-08	3.38926e-07	Gm14569
ENSMUSG00000104649	112.204	1.10351	0.199486	5.53178	3.16993e-08	3.46731e-07	Gm43712
ENSMUSG00000056820	2793.86	0.411627	0.0744275	5.53058	3.19178e-08	3.48811e-07	Tsnax
ENSMUSG00000066438	16.4386	5.20534	0.941328	5.52978	3.20624e-08	3.5008e-07	Plekhd1
ENSMUSG00000085355	27.0871	1.35648	0.245577	5.52364	3.32043e-08	3.61744e-07	3010003L21Rik
ENSMUSG00000078652	3646.22	0.603591	0.109353	5.51965	3.39666e-08	3.69231e-07	Psme3
ENSMUSG00000020537	1279.21	0.665474	0.120617	5.51723	3.44393e-08	3.74039e-07	Drg2
ENSMUSG00000091845	443.829	1.76707	0.32038	5.51555	3.47697e-08	3.77127e-07	Gm4604
ENSMUSG00000060938	15026.7	0.972258	0.176312	5.51443	3.49918e-08	3.79201e-07	Rpl26
ENSMUSG00000044424	299.116	1.59634	0.289545	5.51328	3.52217e-08	3.81524e-07	Gm9493
ENSMUSG00000063605	128.165	1.71982	0.311958	5.51297	3.5282e-08	3.8201e-07	Ccdc102a
ENSMUSG00000033970	1302.39	0.903677	0.163934	5.51244	3.53887e-08	3.82996e-07	Rfc3
ENSMUSG00000066809	98.3221	1.73505	0.314768	5.51216	3.54458e-08	3.83445e-07	Gm10180
ENSMUSG00000043421	359.43	0.713312	0.12942	5.5116	3.55582e-08	3.84491e-07	Hilpda
ENSMUSG00000037278	595.235	1.27926	0.232121	5.5112	3.56395e-08	3.85202e-07	Tmem97
ENSMUSG00000093483	903.774	1.17455	0.213138	5.51076	3.57294e-08	3.86003e-07	AA465934
ENSMUSG00000017404	11221.3	0.976194	0.177429	5.50189	3.75745e-08	4.0416e-07	Rpl19
ENSMUSG00000105879	481.719	1.34165	0.243942	5.49987	3.8007e-08	4.08098e-07	Gm6204
ENSMUSG00000083596	34.2291	2.68035	0.48753	5.49781	3.84527e-08	4.12703e-07	Rpl21-ps15
ENSMUSG00000097900	29.9328	1.50175	0.273173	5.49743	3.85364e-08	4.13421e-07	Gm8652
ENSMUSG00000083061	402.196	1.04247	0.189642	5.49706	3.86176e-08	4.14111e-07	Gm12191
ENSMUSG00000058743	25.0916	1.72391	0.313625	5.49671	3.86947e-08	4.14396e-07	Kcnj14
ENSMUSG00000005251	790.429	3.39068	0.617022	5.49524	3.90171e-08	4.17303e-07	Ripk4
ENSMUSG00000093674	18285.3	1.25039	0.227663	5.49227	3.96808e-08	4.23664e-07	Rpl41
ENSMUSG00000080921	540.632	2.02825	0.369425	5.49029	4.01271e-08	4.28057e-07	Rpl38-ps2
ENSMUSG00000090030	97.339	1.37418	0.250442	5.48701	4.08785e-08	4.34752e-07	A430072P03Rik
ENSMUSG00000041453	16791.3	0.914231	0.166661	5.48557	4.12148e-08	4.38139e-07	Rpl21
ENSMUSG00000011256	1992.18	3.47028	0.632644	5.48536	4.12628e-08	4.3846e-07	Adam19
ENSMUSG00000027963	226.847	0.799267	0.145734	5.48443	4.14811e-08	4.40399e-07	Extl2
ENSMUSG00000028943	101.082	2.28352	0.416455	5.48324	4.176e-08	4.42977e-07	Espn
ENSMUSG00000031766	22.4961	3.22361	0.58796	5.4827	4.18891e-08	4.43942e-07	Slc12a3
ENSMUSG00000035551	57.1426	6.56481	1.19738	5.48263	4.19052e-08	4.43942e-07	Igfbpl1
ENSMUSG00000028393	1450.7	1.45878	0.266153	5.48099	4.22962e-08	4.47506e-07	Alad
ENSMUSG00000027170	4006.36	0.518451	0.0946025	5.48031	4.24585e-08	4.4903e-07	Eif3m
ENSMUSG00000025289	957.491	1.43005	0.261089	5.47725	4.31994e-08	4.56276e-07	Prdx4
ENSMUSG00000055632	136.84	2.20264	0.402256	5.47571	4.35768e-08	4.60064e-07	Hmcn2
ENSMUSG00000082878	29.5183	1.73542	0.31724	5.47037	4.49099e-08	4.73123e-07	Gm12583
ENSMUSG00000058838	134.017	2.08712	0.38162	5.46911	4.52296e-08	4.75879e-07	Rps27a-ps2
ENSMUSG00000020781	363.57	1.13863	0.20823	5.46812	4.54838e-08	4.78144e-07	Tsen54
ENSMUSG00000026494	36.0775	2.01809	0.369288	5.46482	4.63365e-08	4.86276e-07	Kif26b
ENSMUSG00000021116	2706.45	0.780875	0.142911	5.46406	4.65369e-08	4.88171e-07	Eif2s1
ENSMUSG00000030314	492.244	0.76731	0.140463	5.46273	4.68864e-08	4.91262e-07	Atg7
ENSMUSG00000058351	420.816	1.45867	0.267024	5.46271	4.68915e-08	4.91262e-07	Smim4
ENSMUSG00000008450	646.18	0.929036	0.170071	5.46262	4.69147e-08	4.91295e-07	Nutf2
ENSMUSG00000083344	248.786	1.88825	0.345695	5.46219	4.70302e-08	4.92085e-07	Gm7363
ENSMUSG00000110998	31.3485	5.59595	1.02448	5.46224	4.70155e-08	4.92085e-07	AC160394,1
ENSMUSG00000058755	99.8793	1.25731	0.230279	5.45994	4.76306e-08	4.97944e-07	Osm
ENSMUSG00000025436	218.666	1.16183	0.212835	5.45884	4.7926e-08	5.00605e-07	Atp23
ENSMUSG00000024735	4151.6	0.831335	0.152435	5.45371	4.93296e-08	5.13521e-07	Prpf19
ENSMUSG00000111356	240.041	1.74261	0.319602	5.45245	4.96816e-08	5.16747e-07	AC158620,2
ENSMUSG00000034681	1333.77	0.783629	0.143785	5.45	5.03699e-08	5.23463e-07	Rnps1
ENSMUSG00000028029	1545.83	0.774552	0.142126	5.44977	5.04363e-08	5.23917e-07	Aimp1
ENSMUSG00000028597	148.841	2.71782	0.498767	5.44908	5.06303e-08	5.25503e-07	Gpx7
ENSMUSG00000029394	1274.2	1.24003	0.227594	5.44844	5.0814e-08	5.27187e-07	Cdk2ap1
ENSMUSG00000028851	3294.51	0.986489	0.181097	5.44728	5.11446e-08	5.30393e-07	Nudc
ENSMUSG00000073775	877.577	0.673883	0.123722	5.44674	5.13008e-08	5.31788e-07	Kti12
ENSMUSG00000030421	1402.68	0.515763	0.0947333	5.44437	5.19891e-08	5.38243e-07	Uri1
ENSMUSG00000019139	1262.97	0.810978	0.148998	5.44289	5.24234e-08	5.42347e-07	Isyna1
ENSMUSG00000025200	449.78	0.597915	0.109859	5.44257	5.25164e-08	5.43015e-07	Cwf19l1
ENSMUSG00000025218	208.714	1.35264	0.248551	5.44211	5.26523e-08	5.44192e-07	Poll
ENSMUSG00000083311	57.7987	1.54777	0.284425	5.44176	5.27581e-08	5.44827e-07	Gm5643
ENSMUSG00000047921	886.715	0.779913	0.143375	5.43969	5.33748e-08	5.50732e-07	Trappc9
ENSMUSG00000025586	475.94	1.27205	0.233851	5.43958	5.34053e-08	5.50816e-07	Cpeb1
ENSMUSG00000004356	1051.4	0.850474	0.156373	5.43876	5.36525e-08	5.53134e-07	Utp20
ENSMUSG00000062896	151.673	1.97554	0.363271	5.43821	5.38199e-08	5.54604e-07	Rpl31-ps11
ENSMUSG00000056673	224.888	12.038	2.21394	5.43734	5.40811e-08	5.56618e-07	Kdm5d
ENSMUSG00000031983	405.915	0.71415	0.131363	5.43648	5.43445e-08	5.59096e-07	2310022B05Rik
ENSMUSG00000079942	499.718	2.01123	0.370019	5.43547	5.46535e-08	5.62039e-07	Rpl28-ps3
ENSMUSG00000022142	1640.9	0.937379	0.172482	5.43466	5.48996e-08	5.64098e-07	Nup155
ENSMUSG00000021007	102.394	0.882316	0.162434	5.43183	5.57797e-08	5.72901e-07	Spata7
ENSMUSG00000057788	985.698	0.734136	0.135244	5.42823	5.69172e-08	5.84097e-07	Ddx49
ENSMUSG00000024871	69.1504	1.40192	0.258357	5.42628	5.75422e-08	5.89772e-07	Doc2g
ENSMUSG00000026857	456.811	1.00621	0.185479	5.42492	5.79794e-08	5.93758e-07	Ntmt1
ENSMUSG00000069565	2808.4	0.750143	0.138329	5.42288	5.86455e-08	6.00078e-07	Dazap1
ENSMUSG00000018927	811.161	3.05822	0.563992	5.42246	5.87848e-08	6.01253e-07	Ccl6
ENSMUSG00000072692	821.127	1.68972	0.311762	5.41989	5.96373e-08	6.0972e-07	Rpl37rt
ENSMUSG00000047965	205.194	1.37977	0.254597	5.41941	5.97971e-08	6.11099e-07	Rpl9-ps7
ENSMUSG00000030871	240.673	0.862205	0.1591	5.41928	5.98401e-08	6.11285e-07	Ears2
ENSMUSG00000036435	835.978	0.554696	0.102381	5.41795	6.02879e-08	6.15347e-07	Exoc1
ENSMUSG00000029660	28.1636	2.11999	0.391287	5.418	6.02686e-08	6.15347e-07	Tex26
ENSMUSG00000024691	1719.53	1.09312	0.201835	5.41591	6.09778e-08	6.21615e-07	Fam111a
ENSMUSG00000113368	190.09	1.93747	0.358129	5.40996	6.30386e-08	6.41559e-07	AC159815,1
ENSMUSG00000113061	495.739	1.71656	0.317355	5.40898	6.33863e-08	6.4483e-07	AL607105,1
ENSMUSG00000042148	617.586	0.629512	0.116401	5.40812	6.36904e-08	6.47655e-07	Cox10
ENSMUSG00000039263	1750.81	0.819744	0.151624	5.40642	6.42977e-08	6.5356e-07	Npepl1
ENSMUSG00000095847	125.157	1.39902	0.258809	5.40562	6.45864e-08	6.56223e-07	Gm5451
ENSMUSG00000065126	111.856	1.64922	0.305159	5.40448	6.49984e-08	6.60136e-07	Snord104
ENSMUSG00000031660	3500.05	0.659435	0.12202	5.40434	6.50482e-08	6.60369e-07	Brd7
ENSMUSG00000021607	845.931	0.845952	0.156543	5.40394	6.51918e-08	6.61281e-07	Mrpl36
ENSMUSG00000024349	609.417	1.11677	0.206658	5.40396	6.51852e-08	6.61281e-07	Tmem173
ENSMUSG00000054672	851.853	3.65885	0.677086	5.40381	6.52386e-08	6.61482e-07	5830411N06Rik
ENSMUSG00000107061	19.3283	3.39995	0.629293	5.40281	6.56051e-08	6.6465e-07	Gm19590
ENSMUSG00000007739	5292.36	0.654995	0.121234	5.40273	6.5633e-08	6.6466e-07	Cct4
ENSMUSG00000028837	2703.58	0.905914	0.167749	5.40041	6.64888e-08	6.7139e-07	Psmb2
ENSMUSG00000064080	1040.2	2.22555	0.412105	5.40044	6.64784e-08	6.7139e-07	Fbln2
ENSMUSG00000060438	402.619	1.60093	0.29652	5.39906	6.69915e-08	6.76188e-07	Rps10-ps1
ENSMUSG00000042757	59.5347	3.09192	0.572877	5.39718	6.76975e-08	6.83033e-07	Tmem108
ENSMUSG00000028576	229.15	0.710411	0.131654	5.39603	6.81306e-08	6.86558e-07	Ift74
ENSMUSG00000024330	694.071	1.10718	0.205192	5.39583	6.8207e-08	6.87046e-07	Col11a2
ENSMUSG00000026134	1494.68	1.26247	0.234171	5.39123	6.99771e-08	7.04299e-07	Prim2
ENSMUSG00000080205	33.4271	1.72231	0.31948	5.39098	7.00728e-08	7.04973e-07	Gm15526
ENSMUSG00000090891	20.095	3.82601	0.710258	5.38679	7.1727e-08	7.20731e-07	D6Ertd527e
ENSMUSG00000091363	214.453	0.963524	0.178891	5.38611	7.19983e-08	7.2316e-07	Gm7701
ENSMUSG00000066191	78.6213	2.34521	0.435681	5.38286	7.33135e-08	7.3487e-07	Anks6
ENSMUSG00000020843	738.057	0.402334	0.0747526	5.38221	7.35781e-08	7.36941e-07	Timm22
ENSMUSG00000026374	2526.53	0.624095	0.116055	5.37758	7.5493e-08	7.54255e-07	Tsn
ENSMUSG00000022195	740.815	0.727379	0.135307	5.37576	7.62585e-08	7.60975e-07	6030458C11Rik
ENSMUSG00000004446	2007.38	1.03508	0.192556	5.37549	7.63768e-08	7.61846e-07	Bid
ENSMUSG00000024277	905.771	1.58252	0.29447	5.37413	7.69535e-08	7.66977e-07	Mapre2
ENSMUSG00000059586	1000.3	1.04332	0.194192	5.3726	7.76097e-08	7.72577e-07	Nsmce2
ENSMUSG00000097514	9.69441	2.41245	0.449045	5.37241	7.76911e-08	7.73073e-07	Gm17619
ENSMUSG00000040133	21.1965	2.02869	0.377641	5.37201	7.78624e-08	7.74465e-07	Gpr176
ENSMUSG00000041313	1328.3	1.13773	0.211866	5.37007	7.87049e-08	7.82528e-07	Slc7a1
ENSMUSG00000031821	620.85	1.12818	0.210176	5.36777	7.97169e-08	7.91309e-07	Gins2
ENSMUSG00000028743	534.926	1.12182	0.209042	5.36647	8.02927e-08	7.96703e-07	Akr7a5
ENSMUSG00000056941	756.69	0.596563	0.111176	5.36593	8.05353e-08	7.98144e-07	Commd7
ENSMUSG00000000182	8.88676	3.35198	0.624673	5.36598	8.05098e-08	7.98144e-07	Fgf23
ENSMUSG00000105031	83.1196	1.84796	0.344548	5.36344	8.16537e-08	8.07599e-07	Gm3511
ENSMUSG00000037411	239.173	2.114	0.394479	5.35896	8.37035e-08	8.25879e-07	Serpine1
ENSMUSG00000002825	345.488	1.5276	0.285098	5.35818	8.40661e-08	8.29123e-07	Qtrt1
ENSMUSG00000009566	517.995	0.842432	0.15723	5.35797	8.41627e-08	8.29744e-07	Fpgs
ENSMUSG00000081600	26.591	1.15108	0.214979	5.35438	8.58524e-08	8.45723e-07	Gm12286
ENSMUSG00000021958	340.41	1.15125	0.215053	5.35335	8.63408e-08	8.49853e-07	Pinx1
ENSMUSG00000042700	3833.52	0.928234	0.17341	5.35282	8.65949e-08	8.52013e-07	Sipa1l1
ENSMUSG00000044788	50.113	2.77772	0.519088	5.35115	8.7396e-08	8.58864e-07	Fads6
ENSMUSG00000032215	632.541	0.735313	0.137453	5.34954	8.81769e-08	8.655e-07	Rsl24d1
ENSMUSG00000003429	13984.8	1.05531	0.197287	5.34912	8.83846e-08	8.67193e-07	Rps11
ENSMUSG00000061983	18383.3	1.42323	0.266141	5.34764	8.91097e-08	8.73261e-07	Rps12
ENSMUSG00000101452	94.1275	1.75021	0.32744	5.34515	9.03428e-08	8.84288e-07	Gm28530
ENSMUSG00000105866	79.8222	1.71269	0.32045	5.34465	9.05912e-08	8.86013e-07	Gm6745
ENSMUSG00000041632	650.822	0.771475	0.14439	5.343	9.14192e-08	8.93045e-07	Mrps27
ENSMUSG00000002984	1748.43	0.993176	0.185927	5.34174	9.20591e-08	8.9829e-07	Tomm40
ENSMUSG00000083270	36.8315	1.95382	0.365915	5.33954	9.31809e-08	9.08449e-07	Gm13498
ENSMUSG00000002968	1338.52	0.386238	0.0723364	5.33947	9.3218e-08	9.0845e-07	Med25
ENSMUSG00000087652	28.3583	3.02452	0.566485	5.3391	9.3411e-08	9.09971e-07	Gm15918
ENSMUSG00000048603	22.2922	1.27312	0.238476	5.33858	9.36777e-08	9.12207e-07	Gm9828
ENSMUSG00000099471	403.062	1.84376	0.345463	5.33708	9.44567e-08	9.19064e-07	Gm8451
ENSMUSG00000029642	1741.44	0.641328	0.120172	5.33674	9.4635e-08	9.2007e-07	Polr1d
ENSMUSG00000083033	153.641	2.10884	0.39538	5.33372	9.62202e-08	9.34374e-07	Gm9083
ENSMUSG00000043487	53.6459	1.24761	0.234071	5.33005	9.81862e-08	9.52522e-07	Acot6
ENSMUSG00000066902	474.263	1.70224	0.319396	5.32958	9.84427e-08	9.54448e-07	Rps23-ps2
ENSMUSG00000018433	974.304	0.611432	0.114728	5.3294	9.85359e-08	9.54974e-07	Nol11
ENSMUSG00000020526	259.097	0.710451	0.133313	5.32917	9.86611e-08	9.55811e-07	Znhit3
ENSMUSG00000060992	3778.57	0.991834	0.186164	5.32773	9.94461e-08	9.62657e-07	Copz1
ENSMUSG00000022300	722.102	1.50686	0.282861	5.32721	9.97303e-08	9.65029e-07	Dcaf13
ENSMUSG00000099492	147.324	1.58055	0.296721	5.32671	1.00006e-07	9.67316e-07	Gm5525
ENSMUSG00000106930	90.8343	1.71262	0.321606	5.32522	1.00831e-07	9.74141e-07	Gm6450
ENSMUSG00000027832	20.643	3.50667	0.658568	5.32469	1.01128e-07	9.75864e-07	Ptx3
ENSMUSG00000020639	38.8665	1.6543	0.310777	5.3231	1.02012e-07	9.82464e-07	Pfn4
ENSMUSG00000081461	71.9779	2.28918	0.430142	5.32191	1.02681e-07	9.8852e-07	Rpl30-ps11
ENSMUSG00000091742	72.8185	2.10794	0.39617	5.32079	1.03318e-07	9.94262e-07	Gm5093
ENSMUSG00000062461	138.994	1.98514	0.373225	5.31888	1.04406e-07	1.00395e-06	Gm5453
ENSMUSG00000035769	103.125	1.25456	0.235882	5.31862	1.04559e-07	1.00502e-06	Xylb
ENSMUSG00000069188	121.603	1.8712	0.351869	5.31788	1.04982e-07	1.0083e-06	Gm13192
ENSMUSG00000082165	48.328	2.28513	0.429979	5.31452	1.06941e-07	1.02631e-06	Gm7091
ENSMUSG00000071235	60.7052	7.79884	1.46787	5.31303	1.07817e-07	1.03432e-06	Vrtn
ENSMUSG00000034377	1017.74	1.02641	0.193229	5.31191	1.0848e-07	1.03946e-06	Tulp4
ENSMUSG00000082220	35.7587	2.13503	0.402058	5.31025	1.09475e-07	1.04859e-06	Gm12943
ENSMUSG00000029623	2503.28	0.897638	0.169043	5.31013	1.0955e-07	1.0489e-06	Pdap1
ENSMUSG00000066487	42.1483	1.09217	0.205738	5.30853	1.1051e-07	1.05768e-06	Gm5786
ENSMUSG00000082646	57.626	1.88624	0.355527	5.30547	1.12385e-07	1.0752e-06	Gm12732
ENSMUSG00000036661	838.282	1.81515	0.342186	5.30458	1.12933e-07	1.08003e-06	Dennd3
ENSMUSG00000075270	179.414	1.80497	0.340373	5.30292	1.13967e-07	1.08906e-06	Pde11a
ENSMUSG00000061904	7235.99	0.680974	0.128418	5.30278	1.14053e-07	1.08947e-06	Slc25a3
ENSMUSG00000084111	581.028	1.83574	0.346232	5.30205	1.14508e-07	1.09296e-06	Gm15710
ENSMUSG00000081394	262.6	1.86593	0.352091	5.29955	1.16086e-07	1.10673e-06	Gm13215
ENSMUSG00000027230	60.1045	2.09218	0.394822	5.29905	1.16407e-07	1.10894e-06	Creb3l1
ENSMUSG00000084224	54.3015	2.06031	0.388846	5.29851	1.1675e-07	1.11134e-06	Gm12337
ENSMUSG00000063802	877.104	1.16425	0.219863	5.29531	1.18815e-07	1.12881e-06	Hspbp1
ENSMUSG00000083496	100.914	1.88411	0.355859	5.29453	1.19323e-07	1.13276e-06	Gm11263
ENSMUSG00000046034	1185.65	1.04097	0.196669	5.29303	1.20305e-07	1.1412e-06	Otulin
ENSMUSG00000040433	986.398	1.18905	0.224648	5.29293	1.20374e-07	1.14141e-06	Zbtb38
ENSMUSG00000038214	368.102	0.822128	0.155337	5.29253	1.20637e-07	1.14346e-06	Bend3
ENSMUSG00000042208	555.543	1.16467	0.220175	5.28973	1.22499e-07	1.16022e-06	0610010F05Rik
ENSMUSG00000022414	1271.96	1.29546	0.24498	5.28802	1.23646e-07	1.17018e-06	Tab1
ENSMUSG00000114687	68.2811	0.959908	0.181563	5.28691	1.24403e-07	1.17689e-06	AC154572,2
ENSMUSG00000020287	650.994	0.880715	0.166593	5.28663	1.24591e-07	1.17822e-06	Mpg
ENSMUSG00000038965	4121.46	0.683218	0.129307	5.28369	1.26609e-07	1.19593e-06	Ube2l3
ENSMUSG00000051346	212.767	0.557769	0.105619	5.28095	1.28515e-07	1.21253e-06	Spryd4
ENSMUSG00000109933	191.42	1.55355	0.294304	5.27874	1.30075e-07	1.2263e-06	Gm7600
ENSMUSG00000041840	487.063	0.918803	0.174127	5.27661	1.31595e-07	1.23873e-06	Haus1
ENSMUSG00000082465	54.3871	2.07403	0.393196	5.27478	1.32912e-07	1.25066e-06	Rps6-ps3
ENSMUSG00000025104	1234.96	2.53273	0.480268	5.27357	1.33792e-07	1.25797e-06	Hdgfl3
ENSMUSG00000038279	1397.04	0.964071	0.182815	5.27347	1.3387e-07	1.25801e-06	Nop2
ENSMUSG00000087286	14.6006	1.71975	0.326128	5.27324	1.34039e-07	1.25885e-06	Gm9013
ENSMUSG00000033722	224.774	1.88408	0.357323	5.27276	1.34389e-07	1.26166e-06	BC034090
ENSMUSG00000085511	246.233	2.28157	0.432737	5.27243	1.34632e-07	1.26297e-06	Gm11738
ENSMUSG00000082826	22.2233	2.23548	0.424184	5.27007	1.36369e-07	1.2778e-06	Mif-ps3
ENSMUSG00000037847	157.539	1.22409	0.232297	5.26951	1.36785e-07	1.28121e-06	Nmrk1
ENSMUSG00000055932	1431.03	0.44018	0.0835452	5.26877	1.37343e-07	1.28595e-06	Fto
ENSMUSG00000020681	767.164	3.06274	0.581411	5.26777	1.38092e-07	1.29197e-06	Ace
ENSMUSG00000047094	5.4439	5.13955	0.975682	5.26765	1.38183e-07	1.29233e-06	Ofcc1
ENSMUSG00000045733	45.3967	5.36085	1.01807	5.26567	1.39679e-07	1.30584e-06	Sprn
ENSMUSG00000022992	1634.4	0.650335	0.123533	5.26448	1.40588e-07	1.31333e-06	Kansl2
ENSMUSG00000085172	80.6956	0.671568	0.127623	5.26212	1.42403e-07	1.32927e-06	Gm6542
ENSMUSG00000024672	320.342	1.39868	0.265846	5.26123	1.43097e-07	1.33474e-06	Ms4a7
ENSMUSG00000111671	40.7561	1.7933	0.340881	5.26078	1.43448e-07	1.33751e-06	AC156273,2
ENSMUSG00000107946	11.7182	1.44722	0.275101	5.26067	1.43534e-07	1.3378e-06	Gm44066
ENSMUSG00000024525	779.417	0.921085	0.175112	5.25998	1.44069e-07	1.34228e-06	Impa2
ENSMUSG00000097357	32.8703	2.79145	0.530754	5.2594	1.44529e-07	1.34605e-06	Gm16793
ENSMUSG00000039563	9.66728	1.97218	0.375018	5.2589	1.44921e-07	1.34902e-06	2210406O10Rik
ENSMUSG00000060470	469.898	2.48619	0.472763	5.25885	1.44958e-07	1.34902e-06	Adgrg3
ENSMUSG00000038276	12.7923	2.30148	0.437648	5.25875	1.45035e-07	1.34923e-06	Asic3
ENSMUSG00000105558	252.322	1.3937	0.26505	5.25826	1.45428e-07	1.35237e-06	Gm5855
ENSMUSG00000081459	15.9872	1.56143	0.296961	5.25803	1.45607e-07	1.35352e-06	Llph-ps1
ENSMUSG00000092056	37.3925	1.89577	0.360687	5.256	1.47221e-07	1.36801e-06	Gm7289
ENSMUSG00000055762	4499.51	1.4673	0.279188	5.25561	1.47536e-07	1.37043e-06	Eef1d
ENSMUSG00000067367	1660.27	1.15507	0.219789	5.25537	1.47725e-07	1.37166e-06	Lyar
ENSMUSG00000050545	36.7393	1.22785	0.2337	5.25397	1.48857e-07	1.38113e-06	Fam228b
ENSMUSG00000062093	71.4293	1.3038	0.248208	5.25285	1.49761e-07	1.38899e-06	Gm10110
ENSMUSG00000072789	28.1571	1.78677	0.340184	5.25236	1.50165e-07	1.39168e-06	Gm10420
ENSMUSG00000103594	18.5213	4.09107	0.778946	5.25205	1.50412e-07	1.39345e-06	A430034D21Rik
ENSMUSG00000029346	263.397	0.885583	0.16863	5.25164	1.50748e-07	1.39604e-06	Srrd
ENSMUSG00000027430	259.173	0.892957	0.170179	5.24716	1.54463e-07	1.42845e-06	Dtd1
ENSMUSG00000023110	1790.08	0.895715	0.170719	5.24672	1.54834e-07	1.43118e-06	Prmt5
ENSMUSG00000035105	2250.37	1.64642	0.313855	5.24579	1.55614e-07	1.43785e-06	Egln3
ENSMUSG00000079469	269.855	0.619661	0.118127	5.24571	1.55679e-07	1.43791e-06	Pigb
ENSMUSG00000030079	1330.92	0.872105	0.166274	5.24497	1.56307e-07	1.44317e-06	Ruvbl1
ENSMUSG00000027074	944.641	0.81109	0.154731	5.24193	1.58905e-07	1.4655e-06	Slc43a3
ENSMUSG00000111489	5.32663	2.83878	0.541783	5.2397	1.60834e-07	1.48107e-06	AC154826,2
ENSMUSG00000040586	507.041	0.613634	0.117126	5.23909	1.61369e-07	1.48433e-06	Ofd1
ENSMUSG00000034432	1364.81	0.419919	0.0802146	5.23494	1.65037e-07	1.51524e-06	Cops8
ENSMUSG00000031403	2407.39	0.898868	0.171853	5.23044	1.69108e-07	1.54971e-06	Dkc1
ENSMUSG00000040093	2417.46	1.73437	0.331635	5.22974	1.69749e-07	1.55501e-06	Bmf
ENSMUSG00000097403	15.2314	1.69555	0.324237	5.22933	1.70122e-07	1.55785e-06	9230116N13Rik
ENSMUSG00000059565	22.2328	1.78077	0.340564	5.22888	1.7054e-07	1.56109e-06	Gm5292
ENSMUSG00000082895	237.444	1.6352	0.312764	5.22824	1.71131e-07	1.56534e-06	Rpsa-ps9
ENSMUSG00000089993	472.8	1.40332	0.268478	5.22695	1.72327e-07	1.57569e-06	Gm5822
ENSMUSG00000043773	51.432	2.37999	0.455344	5.22679	1.72477e-07	1.57648e-06	1700048O20Rik
ENSMUSG00000081023	21.8	1.61189	0.308452	5.22576	1.73443e-07	1.58471e-06	Gm15766
ENSMUSG00000102972	4.78729	3.75031	0.717696	5.22549	1.73698e-07	1.58645e-06	Gm37348
ENSMUSG00000062458	123.857	2.18481	0.418136	5.22512	1.74046e-07	1.58845e-06	Gm8623
ENSMUSG00000080054	39.7992	2.20613	0.422239	5.22485	1.74301e-07	1.59019e-06	Rpl12-ps1
ENSMUSG00000041471	335.738	0.743049	0.142248	5.22361	1.75464e-07	1.59903e-06	Fam35a
ENSMUSG00000112674	110.538	2.36975	0.453654	5.22368	1.754e-07	1.59903e-06	AC153887,3
ENSMUSG00000085342	215.185	1.4539	0.278382	5.22267	1.76358e-07	1.60553e-06	Gm12254
ENSMUSG00000017713	124.785	1.344	0.257405	5.22135	1.7762e-07	1.61567e-06	Tha1
ENSMUSG00000095597	1464.56	0.963076	0.184534	5.21896	1.79929e-07	1.63547e-06	Gm6472
ENSMUSG00000042540	71.893	2.89239	0.554241	5.21865	1.80232e-07	1.63761e-06	Acot5
ENSMUSG00000100170	47.6922	6.43134	1.23257	5.21781	1.81049e-07	1.64442e-06	Gm28942
ENSMUSG00000020840	2272.34	0.582006	0.111605	5.21488	1.83939e-07	1.66945e-06	Blmh
ENSMUSG00000024208	956.97	1.30432	0.250155	5.21407	1.84745e-07	1.67581e-06	Uqcc2
ENSMUSG00000074412	100.786	1.74757	0.335181	5.21379	1.85022e-07	1.67741e-06	Gm10689
ENSMUSG00000033918	1099.6	0.910645	0.174699	5.21264	1.86172e-07	1.68722e-06	Parl
ENSMUSG00000075581	95.3184	1.92587	0.369517	5.21185	1.8697e-07	1.69382e-06	Gm16409
ENSMUSG00000036781	2173.7	1.06201	0.203921	5.20797	1.90914e-07	1.72574e-06	Rps27l
ENSMUSG00000062284	145.674	1.70823	0.328056	5.20714	1.91771e-07	1.73285e-06	Gm6030
ENSMUSG00000038587	3120.68	1.18324	0.227251	5.20677	1.92159e-07	1.73572e-06	Akap12
ENSMUSG00000031162	56.6052	2.08034	0.399605	5.206	1.92958e-07	1.74166e-06	Gata1
ENSMUSG00000083192	102.908	2.22868	0.428097	5.20601	1.92946e-07	1.74166e-06	Rpl31-ps12
ENSMUSG00000026659	324.904	0.790737	0.151909	5.20532	1.93662e-07	1.74673e-06	Dusp12
ENSMUSG00000110545	64.9064	1.50309	0.288837	5.20395	1.95098e-07	1.75903e-06	Gm7730
ENSMUSG00000050017	2064.82	0.374221	0.0719166	5.20354	1.95531e-07	1.76104e-06	Pitpnb
ENSMUSG00000082193	70.9333	1.43775	0.276303	5.20353	1.95536e-07	1.76104e-06	Rpl5-ps1
ENSMUSG00000082475	98.6478	1.69511	0.325796	5.20299	1.96109e-07	1.76556e-06	Gm7206
ENSMUSG00000083875	18.7077	2.34374	0.450711	5.2001	1.99185e-07	1.79012e-06	Gm13831
ENSMUSG00000069045	409.999	11.3305	2.1789	5.20008	1.99201e-07	1.79012e-06	Ddx3y
ENSMUSG00000082280	21.3526	1.99184	0.383059	5.19982	1.99477e-07	1.79194e-06	Gm5847
ENSMUSG00000047384	2.61004	4.67131	0.898468	5.19919	2.00157e-07	1.79739e-06	A730013G03Rik
ENSMUSG00000109266	50.1662	2.06455	0.397146	5.19846	2.00943e-07	1.80247e-06	Gm6426
ENSMUSG00000048087	789.693	1.08418	0.208637	5.19651	2.03064e-07	1.8195e-06	Gm4737
ENSMUSG00000073771	166.246	0.718848	0.138338	5.1963	2.03293e-07	1.82089e-06	Btbd19
ENSMUSG00000062070	5273.71	0.920903	0.177455	5.1895	2.10854e-07	1.88382e-06	Pgk1
ENSMUSG00000105233	69.2371	2.0073	0.386796	5.18955	2.10802e-07	1.88382e-06	Gm20568
ENSMUSG00000079018	1985.57	3.54216	0.682779	5.18786	2.12727e-07	1.89917e-06	Ly6c1
ENSMUSG00000114288	4.52012	4.56237	0.879454	5.18773	2.12868e-07	1.89974e-06	AC154461,2
ENSMUSG00000034336	63.6328	4.55093	0.877316	5.18734	2.13323e-07	1.90242e-06	Ina
ENSMUSG00000080866	65.7864	1.43921	0.277555	5.18532	2.15643e-07	1.92101e-06	Gm5687
ENSMUSG00000081640	255.353	1.20108	0.231712	5.18349	2.17768e-07	1.93854e-06	Rplp0-ps1
ENSMUSG00000060679	1480.56	0.665623	0.128455	5.18175	2.19814e-07	1.95533e-06	Mrps9
ENSMUSG00000091086	176.048	1.15174	0.222333	5.18023	2.21618e-07	1.96995e-06	Rpl6l
ENSMUSG00000071052	27.3266	2.06568	0.398887	5.17862	2.2353e-07	1.98552e-06	Rpl7a-ps5
ENSMUSG00000086743	51.7015	1.00868	0.19483	5.17724	2.25194e-07	1.99885e-06	Hnrnpa1l2-ps
ENSMUSG00000029163	1016.42	1.58166	0.305603	5.17553	2.27261e-07	2.01502e-06	Emilin1
ENSMUSG00000033233	208.544	1.31915	0.25494	5.17436	2.28694e-07	2.02626e-06	Trim45
ENSMUSG00000061286	1055.86	0.748035	0.144581	5.1738	2.29378e-07	2.03144e-06	Exosc5
ENSMUSG00000103670	4.24572	4.47107	0.864576	5.17141	2.3234e-07	2.05264e-06	Gm37622
ENSMUSG00000059835	53.5015	1.85238	0.35824	5.17079	2.33112e-07	2.05873e-06	Rpl13-ps3
ENSMUSG00000108206	8.4376	5.1825	1.00259	5.16909	2.35237e-07	2.07674e-06	Gm44427
ENSMUSG00000084304	790.353	0.741243	0.14344	5.16763	2.37079e-07	2.09151e-06	Gm6142
ENSMUSG00000072109	52.8592	1.82362	0.353066	5.16511	2.40301e-07	2.11689e-06	A530040E14Rik
ENSMUSG00000082260	196.063	1.99258	0.385798	5.16482	2.40672e-07	2.11864e-06	Gm7429
ENSMUSG00000090602	85.7327	1.14426	0.221576	5.16418	2.4149e-07	2.12432e-06	Gm5611
ENSMUSG00000081572	48.3592	1.8279	0.354062	5.16265	2.43475e-07	2.14101e-06	Gm14138
ENSMUSG00000103933	112.885	2.46862	0.478218	5.16211	2.44177e-07	2.14641e-06	Gm36964
ENSMUSG00000030062	3494.9	0.612329	0.118648	5.1609	2.45761e-07	2.15802e-06	Rpn1
ENSMUSG00000041936	977.401	0.913946	0.17725	5.15626	2.51928e-07	2.20902e-06	Agrn
ENSMUSG00000085791	78.3741	2.03376	0.39459	5.1541	2.54846e-07	2.23301e-06	Rpl30-ps9
ENSMUSG00000107639	51.0077	0.92592	0.179671	5.15341	2.55789e-07	2.23968e-06	Gm4374
ENSMUSG00000061559	1315.84	0.487397	0.0945858	5.15296	2.56407e-07	2.2435e-06	Wdr61
ENSMUSG00000043618	151.687	1.35267	0.262641	5.15028	2.60104e-07	2.27261e-06	Eif5al3-ps
ENSMUSG00000048277	2046.61	1.18904	0.230885	5.14992	2.60592e-07	2.27525e-06	Syngr2
ENSMUSG00000058626	23.0509	2.17361	0.422188	5.14844	2.62664e-07	2.29253e-06	Capn11
ENSMUSG00000042105	439.159	1.16609	0.226582	5.14644	2.65478e-07	2.31462e-06	Inpp5f
ENSMUSG00000039096	63.0233	1.21661	0.236464	5.14503	2.67479e-07	2.32959e-06	Rsad1
ENSMUSG00000068262	77.2271	1.82025	0.353786	5.14506	2.67435e-07	2.32959e-06	Gm5879
ENSMUSG00000026043	5088.85	2.25923	0.439216	5.14378	2.69263e-07	2.34346e-06	Col3a1
ENSMUSG00000036305	452.355	1.22256	0.237705	5.14317	2.70135e-07	2.35022e-06	Rpl39-ps
ENSMUSG00000099980	50.3108	2.16657	0.421421	5.1411	2.7314e-07	2.37552e-06	Gm5619
ENSMUSG00000081620	105.105	1.64869	0.320805	5.13923	2.75866e-07	2.39669e-06	Gm14633
ENSMUSG00000082626	34.2554	1.84591	0.359317	5.13727	2.78753e-07	2.42006e-06	Rps13-ps5
ENSMUSG00000014769	4475	0.71853	0.139902	5.13597	2.8069e-07	2.43533e-06	Psmb1
ENSMUSG00000046636	81.3822	1.81901	0.354172	5.13596	2.8071e-07	2.43533e-06	Gm7729
ENSMUSG00000081642	160.227	1.77797	0.346193	5.13579	2.80959e-07	2.43663e-06	Gm13532
ENSMUSG00000028066	1318.98	1.34942	0.262776	5.13523	2.818e-07	2.4422e-06	Pmf1
ENSMUSG00000016528	2745.98	0.62915	0.12252	5.13507	2.82036e-07	2.44339e-06	Mapkapk2
ENSMUSG00000049439	174.616	0.907575	0.176749	5.13483	2.82393e-07	2.44562e-06	Cyp20a1
ENSMUSG00000040767	770.124	1.06334	0.207116	5.13405	2.8358e-07	2.45503e-06	Snrnp25
ENSMUSG00000100455	83.8957	0.774427	0.150869	5.13313	2.84968e-07	2.46618e-06	Gm29170
ENSMUSG00000015869	1127.35	0.703599	0.137085	5.13256	2.85821e-07	2.47181e-06	Prpsap1
ENSMUSG00000022422	245.742	1.44958	0.282433	5.13248	2.85954e-07	2.4721e-06	Dscc1
ENSMUSG00000080002	51.4473	1.49733	0.291751	5.13223	2.86336e-07	2.47453e-06	Gm5566
ENSMUSG00000066620	24.8795	2.66985	0.520405	5.13034	2.89225e-07	2.49686e-06	Gm4883
ENSMUSG00000109704	8.43724	5.48224	1.06876	5.12956	2.90422e-07	2.50631e-06	Gm38414
ENSMUSG00000100561	28.3664	2.33461	0.455246	5.12824	2.92459e-07	2.52301e-06	Gm7516
ENSMUSG00000022370	1580.41	1.21812	0.237632	5.12609	2.95828e-07	2.5501e-06	Mrpl13
ENSMUSG00000066629	34.7728	2.03253	0.396578	5.12517	2.9727e-07	2.56003e-06	Rpl36-ps3
ENSMUSG00000052609	589.001	1.46087	0.285133	5.12347	2.99969e-07	2.58146e-06	Plekhg3
ENSMUSG00000031960	2489.99	0.981976	0.191699	5.12248	3.01547e-07	2.59413e-06	Aars
ENSMUSG00000040659	1606.32	0.63248	0.123502	5.12123	3.03543e-07	2.61039e-06	Efhd2
ENSMUSG00000066771	43.1954	2.4003	0.468739	5.12078	3.04282e-07	2.61583e-06	Gm5614
ENSMUSG00000020462	732.434	0.42894	0.0837812	5.11976	3.05921e-07	2.62716e-06	Cfap36
ENSMUSG00000007892	26490.5	1.03491	0.202208	5.11804	3.08732e-07	2.65037e-06	Rplp1
ENSMUSG00000006235	77.7346	2.404	0.469747	5.11765	3.09372e-07	2.65494e-06	Epor
ENSMUSG00000038987	24.4537	2.91794	0.570391	5.11569	3.12604e-07	2.68174e-06	Cfap157
ENSMUSG00000038550	50.4108	1.61187	0.315372	5.11101	3.2044e-07	2.74322e-06	Ciart
ENSMUSG00000104960	843.454	1.44757	0.283232	5.1109	3.20629e-07	2.74388e-06	Snhg8
ENSMUSG00000032392	446.681	1.06617	0.208624	5.1105	3.21309e-07	2.74874e-06	Parp16
ENSMUSG00000086290	392.494	1.14171	0.223412	5.11031	3.21626e-07	2.74988e-06	Snhg12
ENSMUSG00000033272	2281.54	0.398725	0.078027	5.11008	3.22014e-07	2.7519e-06	Slc35a4
ENSMUSG00000001082	729.977	1.17107	0.229288	5.10742	3.26589e-07	2.78518e-06	Mfsd10
ENSMUSG00000062365	12.0067	3.28022	0.642288	5.10708	3.2717e-07	2.78917e-06	Gm4968
ENSMUSG00000020766	1445.12	1.24875	0.244533	5.1067	3.27836e-07	2.79388e-06	Galk1
ENSMUSG00000027939	73.0532	0.818314	0.160259	5.10619	3.28714e-07	2.79946e-06	Nup210l
ENSMUSG00000113389	284.45	1.44947	0.28387	5.10612	3.28832e-07	2.79946e-06	AC126799,2
ENSMUSG00000032349	2968.16	0.688018	0.134824	5.1031	3.34128e-07	2.84257e-06	Elovl5
ENSMUSG00000068457	119.86	8.77717	1.72019	5.10245	3.35279e-07	2.85138e-06	Uty
ENSMUSG00000028277	1632.7	0.530047	0.103889	5.10208	3.35949e-07	2.85609e-06	Ube2j1
ENSMUSG00000084874	479.604	0.806006	0.158001	5.10129	3.37349e-07	2.86601e-06	Gm12906
ENSMUSG00000002658	1767.53	0.762304	0.149481	5.09968	3.40226e-07	2.88746e-06	Gtf2f1
ENSMUSG00000113625	118.071	1.67449	0.328399	5.09896	3.41521e-07	2.89645e-06	AC121872,2
ENSMUSG00000059796	19025.7	0.725262	0.142272	5.09773	3.43749e-07	2.91272e-06	Eif4a1
ENSMUSG00000099847	5.43152	4.82794	0.947081	5.09771	3.43795e-07	2.91272e-06	Gm29458
ENSMUSG00000086391	4.38302	4.50422	0.883969	5.09545	3.4792e-07	2.94563e-06	1700042O10Rik
ENSMUSG00000015759	1268.57	0.801586	0.157369	5.09366	3.51207e-07	2.97142e-06	Cnih1
ENSMUSG00000030792	33.5547	2.67179	0.524846	5.09062	3.56902e-07	3.01649e-06	Dkkl1
ENSMUSG00000025461	563.032	3.83037	0.752684	5.08895	3.6005e-07	3.041e-06	Cd163l1
ENSMUSG00000032078	1216.17	0.491718	0.0966421	5.08803	3.61796e-07	3.0547e-06	Zpr1
ENSMUSG00000114784	38.3492	2.44569	0.480884	5.08583	3.66027e-07	3.08618e-06	CT009713,9
ENSMUSG00000025155	1364.6	0.628316	0.123548	5.0856	3.66466e-07	3.08882e-06	Dus1l
ENSMUSG00000028848	421.057	0.838761	0.164964	5.08452	3.6855e-07	3.1032e-06	Gpn2
ENSMUSG00000005899	1496.7	0.715878	0.140826	5.08342	3.7069e-07	3.11809e-06	Smpd4
ENSMUSG00000091194	34.2013	2.01214	0.395867	5.08287	3.71781e-07	3.12505e-06	Gm19840
ENSMUSG00000056851	11257.4	0.781147	0.1537	5.08229	3.72907e-07	3.13344e-06	Pcbp2
ENSMUSG00000037361	2651.56	0.643642	0.126665	5.08144	3.74584e-07	3.14646e-06	Sf3b6
ENSMUSG00000084249	36.7667	1.52017	0.299179	5.08115	3.75163e-07	3.15024e-06	Gm12267
ENSMUSG00000047686	29.1858	4.72325	0.930012	5.0787	3.80035e-07	3.18571e-06	Zcchc5
ENSMUSG00000021820	1613.62	0.868061	0.170941	5.07812	3.8119e-07	3.19213e-06	Camk2g
ENSMUSG00000056155	56.8717	2.03438	0.400615	5.07814	3.81145e-07	3.19213e-06	Nanos3
ENSMUSG00000082121	32.9487	2.0357	0.400875	5.07814	3.81141e-07	3.19213e-06	Gm8199
ENSMUSG00000042087	26.5335	1.39961	0.275712	5.07635	3.84757e-07	3.2198e-06	4933440N22Rik
ENSMUSG00000027902	10.1374	2.77774	0.547205	5.07623	3.84997e-07	3.22071e-06	Chil6
ENSMUSG00000028729	2139.03	0.948606	0.186912	5.07514	3.87204e-07	3.23697e-06	Ebna1bp2
ENSMUSG00000045055	201.717	1.41353	0.278543	5.07471	3.88079e-07	3.24149e-06	Rpsa-ps2
ENSMUSG00000038880	714.724	0.951605	0.187534	5.07431	3.88904e-07	3.24677e-06	Mrps34
ENSMUSG00000028692	8556.2	0.481409	0.0948886	5.07341	3.90741e-07	3.25989e-06	Akr1a1
ENSMUSG00000026837	556.221	1.98932	0.39215	5.07285	3.91911e-07	3.26743e-06	Col5a1
ENSMUSG00000112105	7.50125	2.4535	0.4837	5.07236	3.92908e-07	3.27427e-06	AC155273,1
ENSMUSG00000108366	104.544	1.74225	0.343513	5.07186	3.93938e-07	3.27988e-06	Gm5586
ENSMUSG00000031068	2236.04	0.867554	0.171112	5.0701	3.97603e-07	3.30592e-06	Glrx3
ENSMUSG00000024299	1173.58	0.647718	0.127769	5.06945	3.98958e-07	3.31606e-06	Adamts10
ENSMUSG00000030942	1458.34	0.586733	0.115767	5.06824	4.01507e-07	3.33499e-06	Thumpd1
ENSMUSG00000021902	309.605	0.771291	0.152204	5.0675	4.03073e-07	3.34573e-06	Phf7
ENSMUSG00000068391	906.823	1.11521	0.220208	5.06434	4.09812e-07	3.40052e-06	Chrac1
ENSMUSG00000023169	5192.19	0.887764	0.175387	5.06175	4.15415e-07	3.44586e-06	Slc38a1
ENSMUSG00000091952	29.1173	1.42154	0.281058	5.05782	4.24071e-07	3.51292e-06	Gm17709
ENSMUSG00000113059	124.655	1.34715	0.26639	5.05706	4.25772e-07	3.52582e-06	AC156568,1
ENSMUSG00000101586	6.72889	4.32633	0.855959	5.05437	4.3181e-07	3.57341e-06	Gm29017
ENSMUSG00000033762	721.565	1.48576	0.294026	5.05316	4.34568e-07	3.59502e-06	Recql4
ENSMUSG00000022369	719.532	0.91388	0.180903	5.05177	4.37723e-07	3.61869e-06	Mtbp
ENSMUSG00000082536	4333.21	0.933863	0.184856	5.05184	4.37581e-07	3.61869e-06	Gm13456
ENSMUSG00000042535	2315.24	0.745425	0.147632	5.04923	4.43603e-07	3.6636e-06	Gtpbp1
ENSMUSG00000024170	687.231	0.63903	0.126609	5.04727	4.4816e-07	3.69875e-06	Telo2
ENSMUSG00000010755	971.867	0.980949	0.19439	5.04631	4.50435e-07	3.71489e-06	Cars
ENSMUSG00000073415	89.6168	1.11404	0.220767	5.04625	4.50569e-07	3.71489e-06	Gm10501
ENSMUSG00000027667	530.203	0.488889	0.096889	5.04587	4.51471e-07	3.71858e-06	Zfp639
ENSMUSG00000059923	3650.79	0.526723	0.104423	5.04413	4.556e-07	3.74882e-06	Grb2
ENSMUSG00000017721	1700.8	0.447577	0.0887807	5.04137	4.62204e-07	3.79808e-06	Pigt
ENSMUSG00000038347	113.275	3.07683	0.610379	5.04085	4.63469e-07	3.8072e-06	Tcte2
ENSMUSG00000039230	1572.09	0.588868	0.116828	5.04046	4.64423e-07	3.81377e-06	Tbcd
ENSMUSG00000097493	249.926	2.03344	0.403439	5.04028	4.64863e-07	3.8161e-06	9930014A18Rik
ENSMUSG00000024640	3186.85	1.25987	0.249983	5.03983	4.65941e-07	3.82257e-06	Psat1
ENSMUSG00000006675	93.3532	1.13042	0.224338	5.03892	4.68155e-07	3.83928e-06	P4htm
ENSMUSG00000047434	410.684	1.33681	0.265322	5.03843	4.69376e-07	3.84801e-06	Xxylt1
ENSMUSG00000021886	629.156	1.1288	0.224151	5.0359	4.75615e-07	3.89396e-06	Gpr65
ENSMUSG00000001123	8912.07	1.07673	0.213819	5.03568	4.76151e-07	3.89705e-06	Lgals9
ENSMUSG00000043251	191.956	1.45781	0.289534	5.03502	4.77808e-07	3.90801e-06	Exoc3l
ENSMUSG00000098178	4248.25	1.5808	0.313972	5.03485	4.78234e-07	3.91019e-06	Gm42418
ENSMUSG00000041930	229.217	1.00902	0.200428	5.03433	4.79528e-07	3.91947e-06	Fam222a
ENSMUSG00000113471	7.01603	3.26112	0.647787	5.03424	4.79741e-07	3.91991e-06	CT030657,2
ENSMUSG00000109241	52.7097	1.85077	0.36768	5.03364	4.81259e-07	3.931e-06	Gm7434
ENSMUSG00000015806	1300.54	0.706249	0.140406	5.03003	4.90401e-07	3.99903e-06	Qdpr
ENSMUSG00000054766	6812.16	0.822194	0.163503	5.02862	4.94021e-07	4.02321e-06	Set
ENSMUSG00000059027	213.925	1.369	0.272259	5.02831	4.94824e-07	4.02841e-06	9630013D21Rik
ENSMUSG00000029686	2500.66	0.525125	0.10445	5.02752	4.9686e-07	4.0431e-06	Cul1
ENSMUSG00000081975	59.1272	1.30125	0.258857	5.02691	4.98447e-07	4.05389e-06	Gm12482
ENSMUSG00000025203	10067.5	0.953668	0.189867	5.02281	5.09217e-07	4.13874e-06	Scd2
ENSMUSG00000022479	516.269	2.7526	0.548201	5.02116	5.13606e-07	4.17165e-06	Vdr
ENSMUSG00000033706	602.123	1.04025	0.207203	5.02042	5.15588e-07	4.1836e-06	Smyd5
ENSMUSG00000101431	93.7879	0.941602	0.187611	5.01891	5.1966e-07	4.21386e-06	Gm7901
ENSMUSG00000070319	2784.88	0.840638	0.167503	5.01865	5.2035e-07	4.21667e-06	Eif3g
ENSMUSG00000041773	922.8	1.62674	0.324251	5.01691	5.25096e-07	4.25233e-06	Enc1
ENSMUSG00000062758	61.2279	1.59906	0.318776	5.01625	5.26898e-07	4.26411e-06	Gm16477
ENSMUSG00000040688	1019.51	0.864127	0.172327	5.01446	5.31822e-07	4.30113e-06	Tbl3
ENSMUSG00000033285	1540.26	0.570061	0.113696	5.01392	5.33316e-07	4.31179e-06	Wdr3
ENSMUSG00000079478	420.681	0.992469	0.198028	5.01177	5.39319e-07	4.35602e-06	Sssca1
ENSMUSG00000008333	1635.52	0.718714	0.143416	5.01141	5.4033e-07	4.36275e-06	Snrpb2
ENSMUSG00000030057	11842.5	0.820148	0.163659	5.01131	5.40603e-07	4.36353e-06	Cnbp
ENSMUSG00000036632	816.479	0.78673	0.157018	5.01045	5.43027e-07	4.38165e-06	Alg5
ENSMUSG00000021044	585.05	1.11615	0.222829	5.00898	5.47197e-07	4.40831e-06	Adck1
ENSMUSG00000024273	342.196	0.743978	0.148559	5.00796	5.50098e-07	4.42708e-06	2700062C07Rik
ENSMUSG00000013562	2.73722	4.12413	0.823604	5.00743	5.5163e-07	4.43796e-06	4833413E03Rik
ENSMUSG00000055652	530.265	0.64765	0.129349	5.00701	5.52832e-07	4.44472e-06	Klhl25
ENSMUSG00000000384	1486.53	0.855655	0.170897	5.00685	5.53277e-07	4.44684e-06	Tbrg4
ENSMUSG00000035505	357.349	0.572338	0.114327	5.00617	5.55239e-07	4.46115e-06	Cox18
ENSMUSG00000051518	520.945	1.27477	0.254887	5.0013	5.6946e-07	4.56944e-06	Rps19bp1
ENSMUSG00000018995	725.066	1.34784	0.269508	5.00111	5.70021e-07	4.57244e-06	Nars2
ENSMUSG00000024570	846.265	0.908732	0.181731	5.00042	5.72044e-07	4.58458e-06	Rbfa
ENSMUSG00000110523	9.99952	2.95639	0.591229	5.00041	5.72094e-07	4.58458e-06	C230057M02Rik
ENSMUSG00000087440	28.3689	0.958494	0.191723	4.99937	5.75177e-07	4.60479e-06	4930577N17Rik
ENSMUSG00000068674	52.5717	1.95288	0.390621	4.99942	5.75024e-07	4.60479e-06	Gm10247
ENSMUSG00000021252	707.294	0.623733	0.124849	4.9959	5.85635e-07	4.68535e-06	Erg28
ENSMUSG00000020653	251.679	1.34684	0.269593	4.99584	5.85811e-07	4.68535e-06	Klf11
ENSMUSG00000061684	116.905	1.66391	0.333079	4.99554	5.8672e-07	4.69108e-06	Rpl21-ps8
ENSMUSG00000037685	2912	1.45149	0.290564	4.9954	5.87137e-07	4.69289e-06	Atp8a1
ENSMUSG00000080969	100.109	1.14364	0.228995	4.99418	5.90868e-07	4.72118e-06	Gm12372
ENSMUSG00000019969	1684.73	0.316224	0.0633268	4.99353	5.92862e-07	4.73558e-06	Psen1
ENSMUSG00000000301	90.8555	1.38124	0.276627	4.99316	5.94e-07	4.74159e-06	Pemt
ENSMUSG00000022558	1496.77	0.973093	0.194895	4.9929	5.94779e-07	4.74626e-06	Mroh1
ENSMUSG00000070025	17.3258	1.56704	0.313931	4.99168	5.98566e-07	4.77493e-06	Gm10284
ENSMUSG00000039001	8514.42	1.13942	0.228269	4.99158	5.98862e-07	4.77574e-06	Rps21
ENSMUSG00000063568	135.344	1.53462	0.307514	4.99042	6.02484e-07	4.8015e-06	Jazf1
ENSMUSG00000061650	500.021	0.547419	0.109701	4.99009	6.03523e-07	4.80667e-06	Med9
ENSMUSG00000024829	802.853	0.703325	0.140959	4.98958	6.05092e-07	4.81761e-06	Mrpl21
ENSMUSG00000097081	5.54631	3.38235	0.678111	4.9879	6.10397e-07	4.85669e-06	Gm10425
ENSMUSG00000112395	601.082	0.937729	0.188023	4.9873	6.12285e-07	4.87014e-06	AC159139,1
ENSMUSG00000035754	1156.15	0.671471	0.134679	4.9857	6.17369e-07	4.9074e-06	Wdr18
ENSMUSG00000072576	40.0653	2.01541	0.404289	4.98507	6.1941e-07	4.92203e-06	Gm16020
ENSMUSG00000058799	6682.3	0.875046	0.175546	4.98472	6.20507e-07	4.92916e-06	Nap1l1
ENSMUSG00000086925	78.7645	1.82792	0.366817	4.98319	6.25431e-07	4.96347e-06	Gm6286
ENSMUSG00000093598	12.177	5.42528	1.08883	4.98267	6.27122e-07	4.97527e-06	A730085K08Rik
ENSMUSG00000045996	171.289	1.58568	0.318276	4.98208	6.29044e-07	4.98424e-06	Polr2k
ENSMUSG00000112341	26.199	1.85621	0.372577	4.98207	6.29063e-07	4.98424e-06	AC115290,2
ENSMUSG00000022550	468.342	1.06798	0.214378	4.98177	6.30055e-07	4.99049e-06	Adck5
ENSMUSG00000000884	306.891	0.897484	0.180165	4.98145	6.3111e-07	4.99724e-06	Gnb1l
ENSMUSG00000070871	211.711	0.739326	0.14842	4.9813	6.31581e-07	4.99936e-06	Ccnyl1
ENSMUSG00000026956	281.899	1.0335	0.207521	4.98021	6.35169e-07	5.02614e-06	Uap1l1
ENSMUSG00000035506	25.4027	2.34683	0.471412	4.97829	6.41479e-07	5.07201e-06	Slc12a8
ENSMUSG00000033705	386.024	1.82613	0.366841	4.97798	6.42515e-07	5.07773e-06	Stard9
ENSMUSG00000093720	5.56187	4.23033	0.849958	4.97711	6.45414e-07	5.099e-06	Gm20635
ENSMUSG00000028948	1311.99	0.602644	0.121091	4.97679	6.46469e-07	5.10405e-06	Nol9
ENSMUSG00000082662	14.4339	2.50511	0.503355	4.97684	6.46321e-07	5.10405e-06	Gm15516
ENSMUSG00000002076	11.1699	3.00067	0.603211	4.9745	6.54165e-07	5.15984e-06	Hsf2bp
ENSMUSG00000096988	10.1597	1.8555	0.373071	4.97357	6.57303e-07	5.1796e-06	A930029G22Rik
ENSMUSG00000081076	91.5245	1.92135	0.386647	4.96926	6.72096e-07	5.2877e-06	Rpsa-ps4
ENSMUSG00000001674	1755.18	0.728216	0.146641	4.96599	6.83529e-07	5.36734e-06	Ddx18
ENSMUSG00000087336	9.64576	1.78073	0.358654	4.96505	6.86848e-07	5.39168e-06	Gm15860
ENSMUSG00000049488	94.6611	0.703389	0.141683	4.96452	6.88727e-07	5.40298e-06	Tmem67
ENSMUSG00000109658	69.9738	1.9884	0.400849	4.96046	7.03267e-07	5.51e-06	Gm45660
ENSMUSG00000033423	791.2	0.632176	0.127452	4.96012	7.04482e-07	5.51601e-06	Eri3
ENSMUSG00000103715	42.6955	0.830675	0.167483	4.95976	7.05813e-07	5.52394e-06	4933431K14Rik
ENSMUSG00000078942	189.388	2.22375	0.448409	4.9592	7.07851e-07	5.5371e-06	Naip6
ENSMUSG00000112145	54.7057	1.88112	0.379342	4.95891	7.08911e-07	5.54362e-06	AC155256,1
ENSMUSG00000033752	236.524	1.65469	0.33384	4.95653	7.17624e-07	5.60819e-06	Mnd1
ENSMUSG00000021771	4243.92	0.690636	0.139354	4.95599	7.19616e-07	5.62019e-06	Vdac2
ENSMUSG00000031683	1345.87	0.895436	0.180676	4.95602	7.19508e-07	5.62019e-06	Lsm6
ENSMUSG00000029430	9560.27	0.918325	0.185322	4.95529	7.22243e-07	5.63891e-06	Ran
ENSMUSG00000072940	138.281	0.955415	0.192829	4.95474	7.24277e-07	5.65225e-06	Gm10443
ENSMUSG00000006542	19.6189	4.09365	0.826221	4.95467	7.24548e-07	5.65225e-06	Prkag3
ENSMUSG00000051557	264.818	0.421955	0.0851859	4.95334	7.29492e-07	5.68828e-06	Pusl1
ENSMUSG00000057132	83.5907	2.2984	0.464176	4.95157	7.3618e-07	5.73316e-06	Rpgrip1
ENSMUSG00000075266	457.503	1.51747	0.306544	4.95025	7.41164e-07	5.76649e-06	Cenpw
ENSMUSG00000031629	199.915	1.08627	0.219441	4.95015	7.4158e-07	5.7679e-06	Cenpu
ENSMUSG00000069439	26.2102	2.18882	0.442383	4.9478	7.50586e-07	5.82688e-06	Gm8444
ENSMUSG00000025521	470.689	0.889809	0.179872	4.9469	7.54042e-07	5.85186e-06	Tmem192
ENSMUSG00000084345	53.8667	1.50543	0.304348	4.9464	7.55982e-07	5.86506e-06	Rpl17-ps4
ENSMUSG00000044475	727.987	0.652171	0.13186	4.94593	7.57825e-07	5.87566e-06	Ascc1
ENSMUSG00000054418	17.533	3.06945	0.620654	4.94551	7.59439e-07	5.88505e-06	2900041M22Rik
ENSMUSG00000082474	43.3199	2.01615	0.407701	4.94518	7.60738e-07	5.89266e-06	Gm8213
ENSMUSG00000051498	74.6428	1.38011	0.279113	4.94463	7.62883e-07	5.90292e-06	Tlr6
ENSMUSG00000026511	1756.95	0.668976	0.135331	4.94325	7.68315e-07	5.94199e-06	Srp9
ENSMUSG00000063875	96.5571	1.67473	0.338798	4.94315	7.68704e-07	5.94313e-06	Rps6-ps1
ENSMUSG00000108694	33.8281	2.55356	0.516607	4.94295	7.69504e-07	5.94744e-06	Gm7287
ENSMUSG00000022559	1392.96	1.07088	0.216696	4.94187	7.73751e-07	5.97651e-06	Fbxl6
ENSMUSG00000109059	121.006	1.60708	0.325265	4.94083	7.77911e-07	6.00676e-06	Gm9354
ENSMUSG00000095524	45.9625	2.16885	0.439606	4.93362	8.07184e-07	6.21716e-06	Gm15682
ENSMUSG00000020289	488	0.519878	0.105384	4.93316	8.09101e-07	6.22802e-06	Nprl3
ENSMUSG00000020460	13474.6	0.885027	0.179426	4.93254	8.11652e-07	6.2418e-06	Rps27a
ENSMUSG00000101705	3.12386	4.62638	0.938055	4.93188	8.1441e-07	6.26104e-06	Gm28380
ENSMUSG00000080746	111.964	1.41222	0.286523	4.92881	8.27335e-07	6.34725e-06	Rpsa-ps12
ENSMUSG00000113029	10.1378	6.63399	1.34594	4.92888	8.2703e-07	6.34725e-06	AC122190,1
ENSMUSG00000002274	1243.94	1.20565	0.244691	4.92723	8.34028e-07	6.39586e-06	Metrn
ENSMUSG00000052139	587.912	0.682167	0.138478	4.92617	8.38555e-07	6.42857e-06	Babam2
ENSMUSG00000032383	4011.46	0.754682	0.153217	4.92559	8.41062e-07	6.44578e-06	Ppib
ENSMUSG00000029415	1263.54	0.770127	0.156401	4.92404	8.4774e-07	6.49494e-06	Sdad1
ENSMUSG00000019997	472.414	2.54587	0.517111	4.92325	8.51173e-07	6.51921e-06	Ctgf
ENSMUSG00000020388	503.696	2.26865	0.460841	4.92284	8.52975e-07	6.52894e-06	Pdlim4
ENSMUSG00000033126	95.1539	0.696757	0.141597	4.92072	8.62262e-07	6.59386e-06	Ybey
ENSMUSG00000078180	218.721	1.85135	0.37624	4.92065	8.6256e-07	6.59409e-06	Gm20900
ENSMUSG00000023991	2214.3	1.10243	0.224067	4.92009	8.6503e-07	6.60886e-06	Foxp4
ENSMUSG00000071078	537.849	1.05442	0.214426	4.91739	8.77064e-07	6.69872e-06	Nr2c2ap
ENSMUSG00000061848	354.098	1.14935	0.233744	4.91712	8.78289e-07	6.70599e-06	Gm5805
ENSMUSG00000070667	81.5302	1.70892	0.347573	4.91673	8.80015e-07	6.71709e-06	Rpl31-ps10
ENSMUSG00000083716	589.609	1.27085	0.258566	4.91498	8.87902e-07	6.77098e-06	Gm13436
ENSMUSG00000071547	1743.16	1.24372	0.253118	4.91359	8.9423e-07	6.81711e-06	Nt5dc2
ENSMUSG00000097979	24.017	1.10316	0.224552	4.9127	8.98302e-07	6.83967e-06	Gm4691
ENSMUSG00000061360	2600.81	1.2201	0.248454	4.91077	9.07172e-07	6.90294e-06	Phf5a
ENSMUSG00000114295	35.0687	1.99113	0.405518	4.91008	9.10377e-07	6.92518e-06	AC168881,1
ENSMUSG00000090137	112.989	1.20842	0.246149	4.90932	9.13944e-07	6.95016e-06	Uba52
ENSMUSG00000024217	1451.1	0.859311	0.175119	4.907	9.24796e-07	7.01966e-06	Snrpc
ENSMUSG00000047904	176.665	2.66788	0.543884	4.90525	9.33101e-07	7.07289e-06	Sstr2
ENSMUSG00000061099	7.89578	4.82389	0.983695	4.90385	9.39781e-07	7.1202e-06	Gapdhs
ENSMUSG00000000386	197.104	1.87132	0.381819	4.90106	9.53226e-07	7.21739e-06	Mx1
ENSMUSG00000045690	516.275	0.913081	0.186358	4.89961	9.60287e-07	7.26437e-06	Wdr89
ENSMUSG00000020720	2196.16	0.566133	0.115563	4.89892	9.63667e-07	7.28545e-06	Psmd12
ENSMUSG00000091732	91.7429	1.75571	0.358479	4.89767	9.69813e-07	7.32966e-06	Gm17541
ENSMUSG00000040280	56.384	1.58471	0.323612	4.89695	9.73357e-07	7.35192e-06	Ndufa4l2
ENSMUSG00000053730	364.051	0.669036	0.136644	4.89619	9.77118e-07	7.37807e-06	Tmem39b
ENSMUSG00000082481	43.4391	2.24745	0.45904	4.89598	9.78187e-07	7.38387e-06	Rps12-ps19
ENSMUSG00000036412	3405.56	1.76834	0.361203	4.89571	9.79522e-07	7.39167e-06	Arsi
ENSMUSG00000049577	1408.67	0.969849	0.198165	4.89413	9.87394e-07	7.4488e-06	Zfpm1
ENSMUSG00000101795	625.054	1.04657	0.213918	4.89238	9.96222e-07	7.50893e-06	Gm5835
ENSMUSG00000080932	83.2657	1.55018	0.316884	4.89196	9.98344e-07	7.52216e-06	Gm10224
ENSMUSG00000021190	2200.17	1.62791	0.332804	4.8915	1.00069e-06	7.5352e-06	Lgmn
ENSMUSG00000033845	1280.33	0.738179	0.150915	4.89137	1.00137e-06	7.53806e-06	Mrpl15
ENSMUSG00000028266	2224.44	1.32769	0.271458	4.89097	1.00342e-06	7.54881e-06	Lmo4
ENSMUSG00000062075	1618.88	0.946631	0.193574	4.89029	1.00687e-06	7.5714e-06	Lmnb2
ENSMUSG00000064037	597.018	0.637144	0.130329	4.88873	1.01489e-06	7.6235e-06	Gpn1
ENSMUSG00000032126	815.141	0.764051	0.156287	4.88876	1.01473e-06	7.6235e-06	Hmbs
ENSMUSG00000022483	20.8581	2.27778	0.46592	4.88879	1.01459e-06	7.6235e-06	Col2a1
ENSMUSG00000039660	623.602	0.534321	0.109299	4.8886	1.01556e-06	7.62616e-06	Spout1
ENSMUSG00000082705	68.175	1.33114	0.272303	4.88845	1.01631e-06	7.62948e-06	Gm15616
ENSMUSG00000105838	4.716	5.22187	1.06822	4.88838	1.01669e-06	7.62997e-06	4930425O10Rik
ENSMUSG00000048538	37.6726	1.75747	0.359553	4.88793	1.01901e-06	7.64507e-06	Gm9826
ENSMUSG00000027966	17.7256	4.11902	0.842837	4.88709	1.02339e-06	7.67562e-06	Col11a1
ENSMUSG00000096403	549.007	0.551479	0.112859	4.88644	1.02677e-06	7.69857e-06	Gm9825
ENSMUSG00000027505	24.9607	2.07248	0.424141	4.8863	1.02747e-06	7.70146e-06	Fam209
ENSMUSG00000025574	1937.34	1.24112	0.254071	4.88495	1.03453e-06	7.74262e-06	Tk1
ENSMUSG00000031736	59.9609	3.98061	0.815911	4.87873	1.06769e-06	7.97863e-06	Crnde
ENSMUSG00000042705	429.486	0.608179	0.124673	4.87819	1.07065e-06	7.9983e-06	Commd10
ENSMUSG00000104280	21.7297	1.2914	0.264758	4.87765	1.07356e-06	8.01273e-06	Rps2-ps11
ENSMUSG00000063754	281.039	1.56673	0.32121	4.87758	1.07397e-06	8.01338e-06	Gm10136
ENSMUSG00000039809	30.8726	3.12077	0.639882	4.87711	1.07654e-06	8.03009e-06	Gabbr2
ENSMUSG00000015776	1502.34	0.738802	0.151499	4.87662	1.07921e-06	8.04755e-06	Med22
ENSMUSG00000020695	121.309	1.72919	0.354724	4.87475	1.08947e-06	8.11421e-06	Mrc2
ENSMUSG00000018169	935.562	0.721607	0.148104	4.87229	1.10313e-06	8.20351e-06	Mfng
ENSMUSG00000080875	162.506	1.33085	0.273146	4.87232	1.10294e-06	8.20351e-06	Gm7332
ENSMUSG00000056025	70.214	2.05184	0.421147	4.87201	1.10466e-06	8.20999e-06	Clca3a1
ENSMUSG00000058704	1153.43	0.661066	0.135727	4.87056	1.1128e-06	8.26045e-06	Memo1
ENSMUSG00000082926	66.8504	1.48051	0.303969	4.87062	1.11251e-06	8.26045e-06	Gm8172
ENSMUSG00000020949	1818.23	0.617813	0.126852	4.87034	1.11406e-06	8.26731e-06	Fkbp3
ENSMUSG00000081992	332.212	1.53609	0.315643	4.86653	1.13574e-06	8.42055e-06	Gm13408
ENSMUSG00000059159	79.1582	1.60556	0.329923	4.86645	1.13618e-06	8.42131e-06	Gm8129
ENSMUSG00000034057	91.0535	3.83745	0.789056	4.86333	1.15425e-06	8.54491e-06	Myrfl
ENSMUSG00000086015	26.2317	1.19068	0.244893	4.86202	1.16194e-06	8.59405e-06	4833417C18Rik
ENSMUSG00000058905	192.5	1.41843	0.291757	4.86167	1.16402e-06	8.6069e-06	Gm10051
ENSMUSG00000021866	1153.61	1.09092	0.224504	4.85924	1.17839e-06	8.70528e-06	Anxa11
ENSMUSG00000081857	28.5883	1.68711	0.347192	4.85929	1.17808e-06	8.70528e-06	Gm13624
ENSMUSG00000084276	43.9339	1.51074	0.310932	4.85876	1.18125e-06	8.72376e-06	Gm8317
ENSMUSG00000029925	126.332	1.49135	0.306973	4.85822	1.18443e-06	8.74465e-06	Tbxas1
ENSMUSG00000083454	101.613	1.87141	0.385212	4.85813	1.18502e-06	8.74638e-06	Gm13226
ENSMUSG00000022248	452.916	0.627414	0.129188	4.85659	1.19422e-06	8.8116e-06	Rad1
ENSMUSG00000027610	483.887	0.698427	0.14384	4.85557	1.20043e-06	8.84945e-06	Gss
ENSMUSG00000082609	19.0862	2.04882	0.422132	4.85351	1.21296e-06	8.92578e-06	Gm15464
ENSMUSG00000087292	5.27841	3.17769	0.65483	4.85269	1.21798e-06	8.95471e-06	Gm13832
ENSMUSG00000020978	721.638	0.856079	0.176426	4.85234	1.22014e-06	8.96252e-06	Klhdc2
ENSMUSG00000028937	1513.66	1.12528	0.231912	4.85218	1.22109e-06	8.96681e-06	Acot7
ENSMUSG00000021576	1572.45	0.5933	0.122297	4.8513	1.22657e-06	9.00171e-06	Pdcd6
ENSMUSG00000024218	743.17	0.506312	0.104382	4.85057	1.23108e-06	9.02938e-06	Taf11
ENSMUSG00000019297	1083.96	0.654523	0.134981	4.84901	1.24079e-06	9.09247e-06	Nop9
ENSMUSG00000093565	185.828	1.76463	0.364024	4.84755	1.24995e-06	9.14868e-06	Rab26os
ENSMUSG00000090467	133.42	1.10938	0.228897	4.84665	1.25564e-06	9.18762e-06	Gm4613
ENSMUSG00000083337	144.722	1.57323	0.324736	4.84463	1.26845e-06	9.27579e-06	Gm11539
ENSMUSG00000062582	22.9671	2.14035	0.441976	4.84267	1.28103e-06	9.36221e-06	Rpl30-ps8
ENSMUSG00000113237	36.5137	1.86421	0.385209	4.83946	1.3019e-06	9.50342e-06	AC154231,1
ENSMUSG00000018774	1085.69	1.49453	0.30895	4.83745	1.31518e-06	9.59466e-06	Cd68
ENSMUSG00000052229	24.1204	7.59083	1.57075	4.83261	1.34753e-06	9.81614e-06	Gpr17
ENSMUSG00000048924	235.27	1.08728	0.225086	4.83052	1.3618e-06	9.91128e-06	Ccdc125
ENSMUSG00000039130	819.255	0.611016	0.126521	4.82935	1.36979e-06	9.96647e-06	Zc3hc1
ENSMUSG00000018861	504.113	1.08038	0.223758	4.82836	1.37665e-06	1.00134e-05	Fdxr
ENSMUSG00000034442	389.015	0.525828	0.108913	4.82794	1.37953e-06	1.00314e-05	Trmt5
ENSMUSG00000044442	210.49	0.59409	0.123083	4.82675	1.38782e-06	1.00887e-05	N6amt1
ENSMUSG00000033166	992.619	0.79004	0.163845	4.82188	1.4221e-06	1.03257e-05	Dis3
ENSMUSG00000025265	163.175	1.55497	0.322538	4.82105	1.42802e-06	1.03656e-05	Fgd1
ENSMUSG00000074026	215.654	1.22415	0.25396	4.82025	1.43376e-06	1.0398e-05	Gm6091
ENSMUSG00000110686	46.4798	1.50874	0.313021	4.81991	1.43622e-06	1.04117e-05	Gm45855
ENSMUSG00000002058	440.939	1.30128	0.270036	4.81892	1.44335e-06	1.04553e-05	Unc119
ENSMUSG00000096617	25.8842	1.70231	0.353311	4.81818	1.44875e-06	1.04882e-05	Gm5559
ENSMUSG00000047721	681.718	1.22967	0.255225	4.81798	1.4502e-06	1.04951e-05	Bola2
ENSMUSG00000112099	28.0116	1.56918	0.325697	4.81793	1.45057e-06	1.04951e-05	AC129329,1
ENSMUSG00000079988	28.8409	1.80722	0.375248	4.81608	1.46405e-06	1.05834e-05	Gm11970
ENSMUSG00000028221	324.299	0.825708	0.171455	4.81589	1.46549e-06	1.05906e-05	Tmem55a
ENSMUSG00000030512	1168.08	0.936337	0.194432	4.81575	1.46645e-06	1.05945e-05	Snrpa1
ENSMUSG00000041216	10.9436	5.56639	1.15665	4.81251	1.49043e-06	1.07646e-05	Clvs1
ENSMUSG00000031266	157.282	0.953712	0.198217	4.81144	1.49845e-06	1.08193e-05	Gla
ENSMUSG00000070271	155.807	1.57636	0.327654	4.81106	1.50134e-06	1.0837e-05	Gm13268
ENSMUSG00000059355	883.097	1.03919	0.216033	4.81034	1.50676e-06	1.08671e-05	Wdr83os
ENSMUSG00000114761	6.41677	2.35711	0.49016	4.80885	1.51799e-06	1.09377e-05	AC151730,3
ENSMUSG00000022221	982.846	0.889102	0.184896	4.80867	1.51939e-06	1.09416e-05	Ripk3
ENSMUSG00000020180	2885.45	0.924662	0.192322	4.80787	1.52544e-06	1.09819e-05	Snrpd3
ENSMUSG00000000247	205.14	2.18941	0.45555	4.80608	1.5392e-06	1.10712e-05	Lhx2
ENSMUSG00000028633	1506.29	0.756543	0.15746	4.80466	1.55015e-06	1.11402e-05	Ctps
ENSMUSG00000107026	26.0033	2.07695	0.432394	4.80337	1.56015e-06	1.12022e-05	Gm7504
ENSMUSG00000018239	158.566	0.634961	0.132251	4.80119	1.57729e-06	1.13154e-05	Zcchc10
ENSMUSG00000021047	178.938	3.74547	0.780226	4.80049	1.58275e-06	1.13513e-05	Nova1
ENSMUSG00000059461	288.262	1.53066	0.318872	4.80024	1.58477e-06	1.13592e-05	Gm7331
ENSMUSG00000029003	388.634	0.852588	0.177724	4.79725	1.60855e-06	1.14961e-05	Mad2l2
ENSMUSG00000038298	19.9209	2.16387	0.451061	4.7973	1.60821e-06	1.14961e-05	Pdzk1
ENSMUSG00000114202	34.6873	1.9896	0.414754	4.79705	1.61016e-06	1.15021e-05	AC129975,1
ENSMUSG00000085589	5.23275	3.27742	0.683218	4.79703	1.61032e-06	1.15021e-05	A430078I02Rik
ENSMUSG00000001910	2554.8	0.469732	0.0979501	4.79562	1.6217e-06	1.15738e-05	Nacc1
ENSMUSG00000026021	2507.93	0.592301	0.123509	4.79561	1.62178e-06	1.15738e-05	Sumo1
ENSMUSG00000028455	1247.21	0.80386	0.167691	4.79369	1.63739e-06	1.16818e-05	Stoml2
ENSMUSG00000054690	97.5267	1.19417	0.249193	4.79213	1.65021e-06	1.17665e-05	Emcn
ENSMUSG00000057605	119.262	1.57692	0.329169	4.79061	1.66276e-06	1.1849e-05	Gm6807
ENSMUSG00000025364	6330.62	0.900788	0.188035	4.79055	1.66327e-06	1.18492e-05	Pa2g4
ENSMUSG00000041429	133.197	1.07575	0.224645	4.78866	1.67896e-06	1.19541e-05	Nthl1
ENSMUSG00000041911	236.984	3.5258	0.736294	4.78857	1.67973e-06	1.19561e-05	Dlx1
ENSMUSG00000020431	441.68	1.81682	0.379722	4.78461	1.7132e-06	1.21767e-05	Adcy1
ENSMUSG00000063457	19537.3	1.03772	0.21691	4.78412	1.7174e-06	1.2203e-05	Rps15
ENSMUSG00000071497	207.753	0.744952	0.155738	4.78335	1.72395e-06	1.22447e-05	Nutf2-ps1
ENSMUSG00000068396	424.279	0.930186	0.194572	4.78068	1.74703e-06	1.23921e-05	Rpl34-ps1
ENSMUSG00000030399	259.047	5.05837	1.05829	4.77975	1.75512e-06	1.24423e-05	Ckm
ENSMUSG00000031584	701.318	0.705388	0.147587	4.77947	1.7576e-06	1.24527e-05	Gsr
ENSMUSG00000001380	1785.73	0.481492	0.100744	4.77938	1.75838e-06	1.24546e-05	Hars
ENSMUSG00000045007	69.754	1.77226	0.370848	4.77893	1.76228e-06	1.2475e-05	Tubg2
ENSMUSG00000023018	2219.54	0.675446	0.141345	4.7787	1.76434e-06	1.2486e-05	Smarcd1
ENSMUSG00000043372	176.996	1.03555	0.216716	4.77837	1.76721e-06	1.25027e-05	Hexim2
ENSMUSG00000026355	8009.68	1.20665	0.252602	4.77688	1.78033e-06	1.25919e-05	Mcm6
ENSMUSG00000107462	85.075	1.75119	0.366642	4.77629	1.78562e-06	1.26257e-05	Gm7384
ENSMUSG00000068969	44.3912	2.05963	0.431237	4.77609	1.78736e-06	1.26344e-05	Rpl32-ps
ENSMUSG00000063442	35.7017	2.22949	0.466863	4.77548	1.79279e-06	1.26691e-05	Gm7117
ENSMUSG00000082064	164.105	1.40017	0.293233	4.77493	1.79769e-06	1.27001e-05	Rpl5-ps2
ENSMUSG00000089988	280.364	1.60753	0.336764	4.77347	1.81078e-06	1.27852e-05	Gm16238
ENSMUSG00000039814	94.2375	1.17909	0.247027	4.77312	1.81392e-06	1.28037e-05	Xkr5
ENSMUSG00000054641	40.5457	4.7315	0.991565	4.77176	1.82627e-06	1.28835e-05	Mmrn1
ENSMUSG00000103451	3.48917	4.49621	0.94232	4.77143	1.82924e-06	1.28982e-05	Gm33973
ENSMUSG00000081087	982.106	0.929486	0.194858	4.77007	1.84165e-06	1.29771e-05	Rps15a-ps7
ENSMUSG00000033809	248.078	0.954313	0.20012	4.76871	1.85413e-06	1.30575e-05	Alg3
ENSMUSG00000090159	14.7469	2.00429	0.420411	4.76745	1.86573e-06	1.31317e-05	Gm8580
ENSMUSG00000020496	4060.7	0.697181	0.146242	4.76729	1.86719e-06	1.31382e-05	Rnf187
ENSMUSG00000052962	727.199	0.753369	0.158034	4.76714	1.86857e-06	1.31404e-05	Mrpl35
ENSMUSG00000042462	1128.64	1.30474	0.273701	4.76702	1.86967e-06	1.31444e-05	Dctpp1
ENSMUSG00000005043	312.281	0.828957	0.173903	4.76678	1.87194e-06	1.31566e-05	Sgsh
ENSMUSG00000094989	43.1329	0.914278	0.191825	4.76621	1.87722e-06	1.31899e-05	Rpl9-ps4
ENSMUSG00000028639	11646.7	0.729416	0.153141	4.76304	1.90699e-06	1.33953e-05	Ybx1
ENSMUSG00000020471	928.268	0.984378	0.206719	4.76192	1.91757e-06	1.3458e-05	Pold2
ENSMUSG00000096780	975.576	0.613798	0.128956	4.75975	1.93837e-06	1.35963e-05	Tmem181b-ps
ENSMUSG00000049235	50.8761	1.30723	0.274651	4.75959	1.93983e-06	1.36026e-05	Gm7324
ENSMUSG00000031730	474.413	0.6569	0.138106	4.7565	1.96978e-06	1.37929e-05	Dhodh
ENSMUSG00000031754	1878	0.678823	0.142717	4.75643	1.97047e-06	1.37938e-05	Nudt21
ENSMUSG00000086846	11.2246	1.66614	0.350377	4.75527	1.98183e-06	1.38616e-05	Gm13642
ENSMUSG00000070495	38.435	4.72817	0.994415	4.75473	1.98716e-06	1.38949e-05	Ctcfl
ENSMUSG00000098559	62.4869	1.11681	0.234956	4.75327	2.00154e-06	1.39874e-05	Gm15013
ENSMUSG00000084116	6.76877	2.82406	0.59423	4.75248	2.00941e-06	1.40345e-05	Gm12460
ENSMUSG00000038146	4044.69	2.12626	0.447606	4.7503	2.03113e-06	1.41701e-05	Notch3
ENSMUSG00000069962	21.7761	1.61783	0.341261	4.74075	2.12933e-06	1.48215e-05	Gm5356
ENSMUSG00000020109	786.943	0.351817	0.0742135	4.74061	2.13079e-06	1.48274e-05	Dnajb12
ENSMUSG00000024902	983.371	0.96746	0.204083	4.74052	2.1317e-06	1.48296e-05	Mrpl11
ENSMUSG00000030264	1110.12	0.50214	0.105936	4.74004	2.13677e-06	1.48537e-05	Thumpd3
ENSMUSG00000091735	9.86236	3.50024	0.738436	4.74008	2.13637e-06	1.48537e-05	Gpr62
ENSMUSG00000045302	2593.16	0.742332	0.156634	4.73929	2.1447e-06	1.4899e-05	Preb
ENSMUSG00000031482	323.625	0.540184	0.113996	4.7386	2.15197e-06	1.4941e-05	Slc25a15
ENSMUSG00000036180	2279.29	0.478146	0.100918	4.73799	2.15851e-06	1.49821e-05	Gatad2a
ENSMUSG00000083007	36.1386	1.87508	0.39579	4.73756	2.16306e-06	1.50083e-05	Gm13623
ENSMUSG00000003378	360.134	1.35439	0.285916	4.73701	2.16898e-06	1.50294e-05	Grik5
ENSMUSG00000028044	1816.81	1.18436	0.250043	4.73662	2.17308e-06	1.50535e-05	Cks1b
ENSMUSG00000026974	1080.11	0.980476	0.20701	4.73638	2.17571e-06	1.50633e-05	Zmynd19
ENSMUSG00000030785	31.9889	2.62336	0.553885	4.73628	2.17679e-06	1.50665e-05	Cox6a2
ENSMUSG00000074797	927.338	0.688154	0.145298	4.73615	2.17821e-06	1.50721e-05	Itpa
ENSMUSG00000082044	296.589	0.881829	0.186199	4.73596	2.1802e-06	1.50816e-05	Snrpert
ENSMUSG00000104802	459.634	1.37537	0.290451	4.7353	2.18734e-06	1.51225e-05	Gm5869
ENSMUSG00000093314	10.5002	2.72843	0.576246	4.73484	2.19225e-06	1.51522e-05	Mir5136
ENSMUSG00000030298	2245.19	0.503193	0.106292	4.73407	2.20062e-06	1.52015e-05	Sec13
ENSMUSG00000037089	1216.68	0.658663	0.139154	4.73334	2.20854e-06	1.52476e-05	Slc35b2
ENSMUSG00000078249	1455.69	0.959214	0.202661	4.73311	2.21109e-06	1.52609e-05	Hmga1-rs1
ENSMUSG00000001576	1263.74	0.672021	0.14203	4.73154	2.22824e-06	1.53577e-05	Ergic1
ENSMUSG00000111877	126.138	1.29343	0.273452	4.73	2.24517e-06	1.54658e-05	AC129016,2
ENSMUSG00000028431	883.759	0.803011	0.16987	4.72721	2.27627e-06	1.56712e-05	Ikbkap
ENSMUSG00000091105	9.49905	1.74327	0.368835	4.7264	2.2853e-06	1.5729e-05	Mrto4-ps2
ENSMUSG00000029161	7.4345	2.05115	0.43403	4.72582	2.29191e-06	1.57656e-05	Cgref1
ENSMUSG00000090000	706.813	0.905325	0.191598	4.72513	2.29969e-06	1.58015e-05	Ier3ip1
ENSMUSG00000015943	322.006	1.57465	0.333261	4.72499	2.30125e-06	1.58043e-05	Bola1
ENSMUSG00000113749	15.7169	1.77906	0.376522	4.72498	2.3014e-06	1.58043e-05	AC163633,1
ENSMUSG00000061833	10.249	1.72093	0.36424	4.72472	2.3043e-06	1.58199e-05	Gm6311
ENSMUSG00000083833	117.92	1.25813	0.266322	4.72409	2.31144e-06	1.58644e-05	Gm13841
ENSMUSG00000112474	68.0629	1.54546	0.327172	4.72371	2.3158e-06	1.58899e-05	AC147512,2
ENSMUSG00000028107	1123.4	0.64069	0.135713	4.72091	2.34794e-06	1.6097e-05	Tars2
ENSMUSG00000037461	2302.77	0.599696	0.12706	4.71979	2.36089e-06	1.61813e-05	Ints7
ENSMUSG00000061531	21.9729	3.04759	0.645815	4.71898	2.37035e-06	1.62415e-05	Tmem236
ENSMUSG00000112639	51.4309	2.08715	0.442312	4.71873	2.37318e-06	1.62564e-05	AC134329,1
ENSMUSG00000049643	649.376	0.450162	0.0954129	4.71803	2.38134e-06	1.63032e-05	2310022A10Rik
ENSMUSG00000023048	972.114	1.16914	0.247819	4.71774	2.38479e-06	1.63223e-05	Prr13
ENSMUSG00000080845	20.0556	1.84829	0.391902	4.7162	2.40286e-06	1.64414e-05	Gm9115
ENSMUSG00000090460	21.664	1.94436	0.412374	4.71504	2.41658e-06	1.65307e-05	Gm17511
ENSMUSG00000040824	2359.25	1.08944	0.231096	4.71422	2.42634e-06	1.65928e-05	Snrpd2
ENSMUSG00000037531	512.608	0.674299	0.143041	4.71404	2.42849e-06	1.66029e-05	Mrpl47
ENSMUSG00000091957	18.1645	1.21207	0.257146	4.71354	2.43446e-06	1.66391e-05	Rps2-ps10
ENSMUSG00000101597	137.563	1.8252	0.387324	4.71233	2.44903e-06	1.67201e-05	Gm28555
ENSMUSG00000025330	404.629	1.74516	0.37038	4.7118	2.45539e-06	1.67588e-05	Padi4
ENSMUSG00000074607	280.227	2.72562	0.578553	4.71109	2.46397e-06	1.6808e-05	Tox2
ENSMUSG00000035273	197.316	1.49761	0.317964	4.70999	2.47733e-06	1.68851e-05	Hpse
ENSMUSG00000105124	524.102	1.14092	0.242285	4.70899	2.48951e-06	1.69635e-05	Gm5297
ENSMUSG00000039197	1139	1.39326	0.295885	4.70879	2.49192e-06	1.69749e-05	Adk
ENSMUSG00000085541	6.62836	5.12023	1.08773	4.70726	2.51071e-06	1.70842e-05	Gm16010
ENSMUSG00000029591	792.211	1.31796	0.280025	4.70658	2.51907e-06	1.71364e-05	Ung
ENSMUSG00000028964	3473.53	0.810147	0.172159	4.7058	2.52869e-06	1.71971e-05	Park7
ENSMUSG00000020079	651.396	0.512724	0.108973	4.70506	2.53795e-06	1.72505e-05	Supv3l1
ENSMUSG00000029419	86.849	1.57814	0.335532	4.7034	2.55863e-06	1.73718e-05	Gm996
ENSMUSG00000062619	281.347	1.14855	0.244238	4.70258	2.56901e-06	1.74326e-05	2310039H08Rik
ENSMUSG00000106258	24.8167	1.83812	0.390946	4.70171	2.57992e-06	1.74971e-05	Rpl7a-ps7
ENSMUSG00000047636	9.18171	5.31001	1.1296	4.7008	2.59149e-06	1.75706e-05	Cdcp2
ENSMUSG00000085492	96.4727	0.585516	0.124565	4.7005	2.59527e-06	1.75914e-05	Trmt61b
ENSMUSG00000056310	636.859	0.460272	0.0979376	4.69965	2.60608e-06	1.76503e-05	Tyw1
ENSMUSG00000114931	52.2222	1.82081	0.387436	4.69965	2.60611e-06	1.76503e-05	AC135377,1
ENSMUSG00000030543	12.4973	3.18079	0.676839	4.69948	2.60823e-06	1.76598e-05	Mesp2
ENSMUSG00000083481	30.0695	1.90446	0.405257	4.69939	2.60941e-06	1.76628e-05	Rps8-ps2
ENSMUSG00000086628	7.02895	2.24932	0.478646	4.69933	2.61011e-06	1.76628e-05	Gm16157
ENSMUSG00000090322	7.43173	3.7382	0.79554	4.69895	2.61498e-06	1.76909e-05	Gm17090
ENSMUSG00000022913	786.767	0.965902	0.205609	4.69776	2.63027e-06	1.77894e-05	Psmg1
ENSMUSG00000053030	18.2284	3.44862	0.734243	4.69683	2.64227e-06	1.78657e-05	Spink2
ENSMUSG00000062380	608.416	2.28325	0.486167	4.69643	2.64743e-06	1.78907e-05	Tubb3
ENSMUSG00000083878	184.851	1.72635	0.367623	4.69598	2.65337e-06	1.79259e-05	Gm12034
ENSMUSG00000104159	8.02778	1.80343	0.384044	4.6959	2.6543e-06	1.79273e-05	Gm38099
ENSMUSG00000042644	2307.71	0.670228	0.142746	4.69524	2.66291e-06	1.79755e-05	Itpr3
ENSMUSG00000028318	458.47	0.751207	0.16001	4.69477	2.66911e-06	1.80075e-05	Polr1e
ENSMUSG00000030007	7304.45	0.744283	0.158622	4.69218	2.70307e-06	1.82116e-05	Cct7
ENSMUSG00000092557	10.9904	1.78278	0.37997	4.69189	2.70694e-06	1.82327e-05	Gm8696
ENSMUSG00000020211	1329.53	0.583775	0.124442	4.69115	2.71674e-06	1.82887e-05	Sf3a2
ENSMUSG00000050965	1208.51	1.15692	0.246631	4.69091	2.71994e-06	1.83017e-05	Prkca
ENSMUSG00000111515	97.5852	1.63187	0.348094	4.68802	2.75862e-06	1.85199e-05	AC132474,4
ENSMUSG00000032624	1588.12	0.726881	0.155057	4.68783	2.76112e-06	1.85265e-05	Eml4
ENSMUSG00000066640	328.459	0.515975	0.110076	4.68745	2.76631e-06	1.85513e-05	Fbxl18
ENSMUSG00000108107	20.1976	1.63512	0.348826	4.68749	2.76576e-06	1.85513e-05	Gm5312
ENSMUSG00000065952	12.266	1.86115	0.39708	4.6871	2.77109e-06	1.85782e-05	C330021F23Rik
ENSMUSG00000006998	4946.79	0.376681	0.0803754	4.68653	2.77878e-06	1.86247e-05	Psmd2
ENSMUSG00000082423	74.1492	1.37997	0.294514	4.68559	2.79156e-06	1.87053e-05	Gm15148
ENSMUSG00000074284	25.3745	1.05324	0.22489	4.68336	2.8221e-06	1.88996e-05	Gm10658
ENSMUSG00000106316	27.2571	1.85026	0.395122	4.68275	2.83058e-06	1.89512e-05	Gm43467
ENSMUSG00000068856	1428.39	0.678437	0.144891	4.6824	2.8353e-06	1.89777e-05	Sf3b4
ENSMUSG00000081855	206.355	1.4971	0.31977	4.6818	2.84362e-06	1.90282e-05	Rpl17-ps5
ENSMUSG00000029622	5699.98	0.82771	0.176813	4.68128	2.85093e-06	1.90719e-05	Arpc1b
ENSMUSG00000038005	1744.62	0.818303	0.174821	4.6808	2.85755e-06	1.91047e-05	Hpf1
ENSMUSG00000029560	332.542	1.2748	0.272428	4.6794	2.87717e-06	1.92161e-05	Snx8
ENSMUSG00000081159	149.176	1.21908	0.260548	4.67893	2.8838e-06	1.92551e-05	Gm6023
ENSMUSG00000022468	12894.9	0.841572	0.179924	4.67738	2.90567e-06	1.93906e-05	Endou
ENSMUSG00000100349	14.9612	1.71497	0.366728	4.67642	2.91927e-06	1.94655e-05	Gm28188
ENSMUSG00000075408	12.2338	2.88121	0.616237	4.67548	2.93263e-06	1.95493e-05	6030408B16Rik
ENSMUSG00000030753	2017.37	0.632586	0.135306	4.67523	2.93625e-06	1.95681e-05	Thap12
ENSMUSG00000024841	2107.86	0.53047	0.113476	4.67472	2.94359e-06	1.96117e-05	Eif1ad
ENSMUSG00000018326	6484.04	0.614733	0.131513	4.67431	2.94949e-06	1.96457e-05	Ywhab
ENSMUSG00000069862	34.4363	1.91007	0.408683	4.67373	2.95785e-06	1.9696e-05	Rps12-ps9
ENSMUSG00000053332	2024.54	1.02565	0.219622	4.67008	3.0108e-06	2.00161e-05	Gas5
ENSMUSG00000100865	143.674	1.97646	0.423248	4.66974	3.01574e-06	2.00435e-05	Gm9320
ENSMUSG00000021418	139.995	1.01647	0.21773	4.66846	3.03467e-06	2.01562e-05	Rpp40
ENSMUSG00000105077	36.7003	1.25477	0.268774	4.6685	3.03408e-06	2.01562e-05	Gm4859
ENSMUSG00000113448	7.1105	2.35586	0.504857	4.6664	3.06518e-06	2.03391e-05	CT030166,4
ENSMUSG00000033880	2642.84	0.873658	0.187292	4.66469	3.09079e-06	2.0498e-05	Lgals3bp
ENSMUSG00000113340	45.287	1.97103	0.422617	4.66388	3.10299e-06	2.05622e-05	AC154248,1
ENSMUSG00000047676	496.768	1.03405	0.221742	4.66333	3.11139e-06	2.06067e-05	Rpsa-ps10
ENSMUSG00000056772	24.7546	1.81185	0.388538	4.66327	3.1123e-06	2.06072e-05	Rps6-ps2
ENSMUSG00000025041	1574.22	0.525693	0.112746	4.66263	3.12192e-06	2.06557e-05	Nt5c2
ENSMUSG00000001844	845.076	0.875331	0.187884	4.6589	3.17911e-06	2.10156e-05	Zdhhc4
ENSMUSG00000083121	89.566	1.70454	0.365881	4.65874	3.18158e-06	2.10263e-05	Gm6341
ENSMUSG00000024181	1235.76	0.905166	0.194423	4.65566	3.22951e-06	2.12972e-05	Mrpl28
ENSMUSG00000045608	45.363	1.69486	0.364041	4.65569	3.22896e-06	2.12972e-05	Dbx2
ENSMUSG00000094344	1611.19	1.68374	0.361676	4.65538	3.23388e-06	2.13204e-05	Gm11942
ENSMUSG00000068243	194.971	1.6079	0.345422	4.65488	3.24166e-06	2.13602e-05	Gm7079
ENSMUSG00000037349	318.657	1.23341	0.265026	4.65395	3.25642e-06	2.14459e-05	Nudt22
ENSMUSG00000066592	118.546	1.68861	0.362947	4.65251	3.27923e-06	2.15731e-05	Gm7589
ENSMUSG00000040234	550.211	0.715683	0.153898	4.65038	3.31327e-06	2.17912e-05	Tm7sf3
ENSMUSG00000016541	3769.04	0.906826	0.195004	4.65031	3.31443e-06	2.17929e-05	Atxn10
ENSMUSG00000082741	45.9312	1.52863	0.328744	4.6499	3.32096e-06	2.183e-05	Gm9703
ENSMUSG00000053684	145.659	0.813535	0.175	4.64878	3.33896e-06	2.19358e-05	BC048403
ENSMUSG00000021414	28.9257	3.73519	0.803484	4.64874	3.33973e-06	2.19358e-05	Fam217a
ENSMUSG00000029147	4384.05	0.680352	0.146363	4.64839	3.34541e-06	2.19673e-05	Ppm1g
ENSMUSG00000020755	1084.57	0.428271	0.0921717	4.64645	3.37689e-06	2.21444e-05	Sap30bp
ENSMUSG00000021707	1316.62	1.12415	0.241956	4.64609	3.38285e-06	2.21776e-05	Dhfr
ENSMUSG00000020018	2373.17	1.10933	0.238806	4.64531	3.39572e-06	2.2256e-05	Snrpf
ENSMUSG00000081608	10.6552	1.96788	0.423653	4.64504	3.40016e-06	2.22732e-05	Gm16210
ENSMUSG00000076754	624.399	2.84857	0.613668	4.64188	3.45258e-06	2.26046e-05	Trgv2
ENSMUSG00000064281	99.2423	1.47687	0.318312	4.6397	3.48922e-06	2.28262e-05	Rpl19-ps1
ENSMUSG00000024346	1023.25	0.921194	0.198616	4.63806	3.51689e-06	2.30011e-05	Pfdn1
ENSMUSG00000055067	443.048	0.59744	0.128833	4.63732	3.52953e-06	2.30654e-05	Smyd3
ENSMUSG00000024790	497.491	0.879235	0.189598	4.63736	3.52895e-06	2.30654e-05	Sac3d1
ENSMUSG00000072663	88.3276	1.09026	0.23514	4.63663	3.5414e-06	2.31342e-05	Spef2
ENSMUSG00000036112	4275.06	0.576705	0.124422	4.63508	3.56794e-06	2.32731e-05	Metap2
ENSMUSG00000002129	3179.73	0.512895	0.110729	4.63198	3.62181e-06	2.36182e-05	Sf3a1
ENSMUSG00000113999	18.4984	1.71599	0.370549	4.63094	3.64018e-06	2.37316e-05	AC132954,4
ENSMUSG00000045665	806.22	1.06789	0.230606	4.63077	3.64303e-06	2.3744e-05	Mfsd5
ENSMUSG00000085705	6.25274	5.04888	1.09055	4.62967	3.66247e-06	2.3858e-05	Gm16046
ENSMUSG00000028602	689.62	2.00369	0.432851	4.62905	3.67343e-06	2.39231e-05	Tnfrsf8
ENSMUSG00000112612	28.6164	1.2914	0.279058	4.62773	3.69702e-06	2.40703e-05	AC159334,1
ENSMUSG00000081575	2076.52	0.699088	0.151068	4.62764	3.69861e-06	2.40742e-05	Gm12090
ENSMUSG00000025971	430.138	0.664475	0.143592	4.62752	3.70075e-06	2.40818e-05	Maip1
ENSMUSG00000010936	1108.48	0.481354	0.104051	4.62614	3.7254e-06	2.42294e-05	Vac14
ENSMUSG00000071715	595.396	1.82811	0.395354	4.62398	3.76444e-06	2.44639e-05	Ncf4
ENSMUSG00000109905	18.2619	2.38551	0.516066	4.62249	3.79153e-06	2.46204e-05	Gm7380
ENSMUSG00000096199	247.427	0.874333	0.189243	4.62016	3.83451e-06	2.48929e-05	Ptrhd1
ENSMUSG00000110682	84.7709	2.44095	0.528518	4.61848	3.86563e-06	2.50817e-05	A530010L16Rik
ENSMUSG00000062083	596.135	0.866368	0.187655	4.61681	3.89692e-06	2.52679e-05	Rpl13a-ps1
ENSMUSG00000046999	88.1082	2.03596	0.441063	4.61604	3.91132e-06	2.53513e-05	1110032F04Rik
ENSMUSG00000025816	303.785	0.72294	0.156639	4.61533	3.92469e-06	2.54247e-05	Sec61a2
ENSMUSG00000025980	7825.47	0.923863	0.20018	4.61517	3.92778e-06	2.54379e-05	Hspd1
ENSMUSG00000054191	5.63096	2.42711	0.525906	4.6151	3.92911e-06	2.54398e-05	Klf1
ENSMUSG00000027233	47.1864	1.87299	0.40592	4.61419	3.94627e-06	2.55442e-05	Patl2
ENSMUSG00000100078	279.465	1.45165	0.314662	4.61335	3.96238e-06	2.56282e-05	Gm6170
ENSMUSG00000062279	10.2633	2.54151	0.551023	4.61234	3.98161e-06	2.57459e-05	Gm10237
ENSMUSG00000077212	18.0882	1.68722	0.36582	4.61215	3.9852e-06	2.57623e-05	Snord69
ENSMUSG00000029911	1220.53	0.607361	0.131698	4.61176	3.99266e-06	2.58037e-05	Ssbp1
ENSMUSG00000021905	578.894	0.633238	0.137316	4.61153	3.99724e-06	2.58265e-05	Dph3
ENSMUSG00000080851	10.2705	2.5386	0.550685	4.6099	4.02862e-06	2.60224e-05	Gm12094
ENSMUSG00000050822	21.93	2.63856	0.572446	4.60928	4.0406e-06	2.6093e-05	Slc29a4
ENSMUSG00000029373	87.4758	1.75709	0.381261	4.60864	4.0531e-06	2.61669e-05	Pf4
ENSMUSG00000026938	357.835	2.25061	0.488402	4.60811	4.06338e-06	2.62263e-05	Fcna
ENSMUSG00000024220	614.817	0.605931	0.131544	4.6063	4.09898e-06	2.64422e-05	Zfp523
ENSMUSG00000062713	89.729	7.35726	1.59737	4.60585	4.10791e-06	2.64928e-05	Sim2
ENSMUSG00000043903	11.9452	2.69999	0.586233	4.60566	4.11162e-06	2.65098e-05	Zfp469
ENSMUSG00000037772	634.133	0.98718	0.214358	4.60529	4.11886e-06	2.65495e-05	Mrpl23
ENSMUSG00000070056	1470.27	1.36336	0.296059	4.60503	4.12402e-06	2.65758e-05	Mfhas1
ENSMUSG00000004996	313.806	1.07105	0.232611	4.60447	4.13525e-06	2.66342e-05	Mri1
ENSMUSG00000074406	383.004	0.561668	0.121985	4.6044	4.13656e-06	2.66357e-05	Zfp628
ENSMUSG00000060739	2760.07	0.399938	0.0868639	4.6042	4.1406e-06	2.66547e-05	Nsa2
ENSMUSG00000063801	919.896	0.364813	0.079259	4.6028	4.16847e-06	2.68131e-05	Ap3s2
ENSMUSG00000056427	352.5	2.24551	0.48806	4.60089	4.20684e-06	2.70245e-05	Slit3
ENSMUSG00000090319	8.59722	1.5393	0.334612	4.60025	4.21983e-06	2.70938e-05	Gm4462
ENSMUSG00000038762	3521.51	0.535169	0.116343	4.59991	4.22683e-06	2.71316e-05	Abcf1
ENSMUSG00000042111	572.336	0.575849	0.125213	4.59895	4.24626e-06	2.7235e-05	Ccdc115
ENSMUSG00000093885	44.9069	1.69702	0.369068	4.59813	4.26299e-06	2.73115e-05	Rpl35a-ps5
ENSMUSG00000026955	307.887	1.36269	0.296433	4.59696	4.28691e-06	2.74527e-05	Sapcd2
ENSMUSG00000085385	498.954	0.76512	0.166474	4.59604	4.3059e-06	2.756e-05	Snhg17
ENSMUSG00000034427	53.4122	2.43431	0.529761	4.59511	4.32513e-06	2.76687e-05	Myo15b
ENSMUSG00000030588	715.499	0.90223	0.196369	4.59456	4.33674e-06	2.77285e-05	Yif1b
ENSMUSG00000107383	481.757	1.04083	0.226533	4.5946	4.33582e-06	2.77285e-05	Gm4366
ENSMUSG00000028541	42.015	1.8833	0.409955	4.59393	4.34975e-06	2.78045e-05	B4galt2
ENSMUSG00000028882	1946.37	0.558669	0.121636	4.59294	4.37035e-06	2.79216e-05	Ppp1r8
ENSMUSG00000052253	1046.04	0.726456	0.158186	4.59242	4.38139e-06	2.79763e-05	Zfp622
ENSMUSG00000070692	81.5263	1.82183	0.396707	4.59237	4.38233e-06	2.79763e-05	Rps12-ps10
ENSMUSG00000003873	781.584	0.963697	0.209858	4.59214	4.38733e-06	2.8001e-05	Bax
ENSMUSG00000076433	8.58243	1.74775	0.380642	4.59159	4.39874e-06	2.80592e-05	Cep295nl
ENSMUSG00000022019	455.147	0.421162	0.0917303	4.59131	4.40482e-06	2.80712e-05	Tdrd3
ENSMUSG00000033685	20250.4	0.737975	0.160736	4.59123	4.40632e-06	2.80712e-05	Ucp2
ENSMUSG00000014907	319.123	0.915618	0.199426	4.59127	4.4056e-06	2.80712e-05	Naf1
ENSMUSG00000038034	653.292	0.761833	0.165977	4.58999	4.43274e-06	2.82321e-05	Igsf8
ENSMUSG00000030082	3498.33	0.349551	0.0761835	4.58828	4.46914e-06	2.84345e-05	Sec61a1
ENSMUSG00000003299	1186.08	0.848498	0.184982	4.58693	4.49803e-06	2.85887e-05	Mrpl4
ENSMUSG00000029730	6992.47	0.965843	0.210654	4.58498	4.54034e-06	2.88353e-05	Mcm7
ENSMUSG00000113113	117.886	1.5605	0.340402	4.58429	4.5553e-06	2.89228e-05	AC159818,1
ENSMUSG00000106895	67.8177	1.36678	0.298186	4.58364	4.56945e-06	2.90027e-05	Gm4754
ENSMUSG00000083382	12.1114	1.98998	0.43426	4.58247	4.59516e-06	2.91533e-05	Gm6433
ENSMUSG00000018921	861.483	0.557957	0.121783	4.58157	4.61495e-06	2.92562e-05	Pelp1
ENSMUSG00000036905	3433.77	1.34896	0.294469	4.58099	4.62789e-06	2.93085e-05	C1qb
ENSMUSG00000078713	1094.56	1.03136	0.225211	4.57954	4.66002e-06	2.94962e-05	Tomm5
ENSMUSG00000026811	200.452	1.40828	0.307537	4.57921	4.66725e-06	2.95344e-05	St6galnac6
ENSMUSG00000110057	174.962	1.06913	0.23348	4.57909	4.67003e-06	2.95444e-05	Gm2225
ENSMUSG00000013611	160.61	1.72947	0.377805	4.57767	4.70178e-06	2.97376e-05	Snx31
ENSMUSG00000035279	40.5871	1.84468	0.402984	4.57754	4.70473e-06	2.97486e-05	Ssc5d
ENSMUSG00000082542	10.8211	1.92123	0.419775	4.57681	4.7212e-06	2.98451e-05	Gm13311
ENSMUSG00000034235	302.664	1.13112	0.247212	4.57549	4.75109e-06	3.00109e-05	Usp54
ENSMUSG00000020238	1719.57	0.493764	0.107928	4.57492	4.7641e-06	3.00853e-05	Ncln
ENSMUSG00000091285	32.9776	1.97344	0.43143	4.57419	4.78076e-06	3.01828e-05	Gm17430
ENSMUSG00000031568	840.763	0.395959	0.0865663	4.57405	4.78377e-06	3.0194e-05	Rwdd4a
ENSMUSG00000026917	2170.14	0.608856	0.133177	4.5718	4.83562e-06	3.04978e-05	Wdr5
ENSMUSG00000033857	964.792	0.874771	0.19137	4.57109	4.85193e-06	3.05928e-05	Engase
ENSMUSG00000018001	786.089	1.38576	0.303184	4.57068	4.86142e-06	3.06448e-05	Cyth3
ENSMUSG00000068196	81.0726	2.32461	0.508649	4.57016	4.87349e-06	3.0713e-05	Col8a1
ENSMUSG00000032199	2200.09	0.313694	0.0686638	4.56855	4.91113e-06	3.09343e-05	Polr2m
ENSMUSG00000097756	13.1693	3.93213	0.860786	4.56807	4.92247e-06	3.09899e-05	A730056A06Rik
ENSMUSG00000090142	76.0688	1.81794	0.398074	4.56684	4.95134e-06	3.11636e-05	Gm15795
ENSMUSG00000063160	104.584	0.894602	0.1959	4.56664	4.95608e-06	3.11855e-05	Numbl
ENSMUSG00000007080	1640.17	1.17393	0.257107	4.56593	4.97283e-06	3.12749e-05	Pole
ENSMUSG00000029326	436.996	0.56783	0.124366	4.5658	4.97584e-06	3.12858e-05	Enoph1
ENSMUSG00000045983	9775.01	0.425847	0.0932732	4.56558	4.98105e-06	3.13105e-05	Eif4g1
ENSMUSG00000020361	5099.93	0.556187	0.12186	4.56417	5.01486e-06	3.14828e-05	Hspa4
ENSMUSG00000104623	1389.73	1.01419	0.222302	4.56223	5.06137e-06	3.17586e-05	Gm6394
ENSMUSG00000029440	725.616	0.610221	0.13381	4.56036	5.1065e-06	3.20254e-05	Psmd9
ENSMUSG00000034684	465.89	1.81881	0.399335	4.5546	5.24843e-06	3.28904e-05	Sema3f
ENSMUSG00000111966	163.434	1.74564	0.383304	4.55419	5.25884e-06	3.29304e-05	AL589661,1
ENSMUSG00000020935	588.373	0.695573	0.15277	4.55308	5.28665e-06	3.30876e-05	Dcakd
ENSMUSG00000113070	15.4168	1.43752	0.315729	4.55303	5.28798e-06	3.30876e-05	AC134439,1
ENSMUSG00000013846	1489.62	0.765288	0.168112	4.55224	5.30785e-06	3.31781e-05	St3gal1
ENSMUSG00000035352	64.2358	1.58754	0.348776	4.55174	5.32045e-06	3.32484e-05	Ccl12
ENSMUSG00000067106	177.307	1.25453	0.275685	4.5506	5.34936e-06	3.34036e-05	Gm5529
ENSMUSG00000039031	773.524	0.656051	0.14425	4.548	5.41569e-06	3.3792e-05	Arhgap18
ENSMUSG00000090553	2767.63	0.755128	0.166061	4.54728	5.43438e-06	3.39e-05	Snrpe
ENSMUSG00000069117	43.3088	1.65025	0.362964	4.5466	5.45183e-06	3.40003e-05	Gm10260
ENSMUSG00000026791	207.297	1.20887	0.265931	4.5458	5.47274e-06	3.4122e-05	Slc2a8
ENSMUSG00000028766	155.475	3.10642	0.683368	4.54575	5.47412e-06	3.4122e-05	Alpl
ENSMUSG00000046711	2576.42	0.980723	0.215759	4.54547	5.48137e-06	3.41498e-05	Hmga1
ENSMUSG00000038622	1328.97	0.839062	0.184607	4.54513	5.49014e-06	3.41872e-05	Med30
ENSMUSG00000055835	194.655	0.752057	0.165475	4.54484	5.49759e-06	3.42249e-05	Zfp1
ENSMUSG00000005102	461.712	0.633096	0.13933	4.54386	5.52331e-06	3.43676e-05	Eif2ak4
ENSMUSG00000053565	3706.38	0.742031	0.163343	4.54279	5.55145e-06	3.45252e-05	Eif3k
ENSMUSG00000019782	1026.1	0.501024	0.110352	4.54025	5.61872e-06	3.49082e-05	Rwdd1
ENSMUSG00000100555	6.36345	1.64648	0.362814	4.53808	5.6768e-06	3.52512e-05	Gm8173
ENSMUSG00000083761	10.1198	1.77306	0.390758	4.5375	5.69252e-06	3.53399e-05	Pgam1-ps1
ENSMUSG00000052698	791.469	2.89158	0.637548	4.53547	5.74758e-06	3.56547e-05	Tln2
ENSMUSG00000003438	1333.96	0.854488	0.188417	4.53508	5.75826e-06	3.5712e-05	Timm50
ENSMUSG00000058715	550.842	1.20495	0.265703	4.53494	5.76203e-06	3.57263e-05	Fcer1g
ENSMUSG00000037275	1750.17	0.573902	0.126567	4.53437	5.77761e-06	3.58049e-05	Gemin5
ENSMUSG00000052605	285.39	1.23811	0.273128	4.53307	5.81317e-06	3.60161e-05	Isoc2b
ENSMUSG00000022205	5057.9	0.902393	0.199075	4.53294	5.81691e-06	3.60302e-05	Sub1
ENSMUSG00000029480	659.6	0.501243	0.110586	4.53261	5.82587e-06	3.60676e-05	Dhx37
ENSMUSG00000061577	345.699	1.90871	0.421124	4.53243	5.83098e-06	3.60901e-05	Adgrg5
ENSMUSG00000104360	8.47021	2.40439	0.530509	4.53222	5.8366e-06	3.61158e-05	Gm8762
ENSMUSG00000037536	567.402	0.493039	0.108804	4.53144	5.85831e-06	3.6241e-05	Fbxo34
ENSMUSG00000108122	3.55829	3.59762	0.794297	4.52931	5.91763e-06	3.65804e-05	Gm44116
ENSMUSG00000022519	288.95	0.736218	0.162597	4.52786	5.95829e-06	3.6804e-05	Srl
ENSMUSG00000112605	36.9418	1.74578	0.385579	4.52769	5.96331e-06	3.68257e-05	CR974589,1
ENSMUSG00000059246	178.792	2.67236	0.590408	4.52629	6.0027e-06	3.70503e-05	Foxb1
ENSMUSG00000074336	8.19181	2.95939	0.653868	4.52598	6.01153e-06	3.70955e-05	Apoc4
ENSMUSG00000042043	890.664	0.82895	0.183219	4.52436	6.05773e-06	3.73524e-05	Tbca
ENSMUSG00000097803	36.5166	1.46738	0.324426	4.523	6.09686e-06	3.75654e-05	Rpl31-ps16
ENSMUSG00000060121	422.107	0.570923	0.12623	4.52287	6.1008e-06	3.75709e-05	Gemin2
ENSMUSG00000028691	8083.3	0.665451	0.147208	4.52049	6.16961e-06	3.79661e-05	Prdx1
ENSMUSG00000084288	14.761	2.044	0.452182	4.52031	6.17501e-06	3.79847e-05	Gm5228
ENSMUSG00000081491	43.0356	1.6728	0.370102	4.51984	6.18874e-06	3.80553e-05	Gm12778
ENSMUSG00000028884	2163.85	0.977211	0.216273	4.51841	6.23056e-06	3.82741e-05	Rpa2
ENSMUSG00000070167	38.781	1.89695	0.419949	4.5171	6.26918e-06	3.84983e-05	Snora57
ENSMUSG00000028111	137.197	1.2508	0.276915	4.51692	6.27442e-06	3.85147e-05	Ctsk
ENSMUSG00000083911	48.7062	1.74011	0.385615	4.51255	6.40521e-06	3.93077e-05	Gm4342
ENSMUSG00000041377	8.75994	3.13745	0.695464	4.5113	6.44316e-06	3.95169e-05	Ninj2
ENSMUSG00000097554	8.5639	2.10738	0.467147	4.51116	6.4473e-06	3.95265e-05	Gm26825
ENSMUSG00000011752	1495.91	1.00956	0.223805	4.51089	6.45574e-06	3.95684e-05	Pgam1
ENSMUSG00000066362	1919.34	1.16314	0.257948	4.50918	6.50772e-06	3.98571e-05	Rps13-ps1
ENSMUSG00000108437	28.1697	1.7733	0.393464	4.50688	6.57879e-06	4.02623e-05	Gm19366
ENSMUSG00000102117	76.5561	1.65975	0.368298	4.50655	6.58899e-06	4.03046e-05	Rpsa-ps1
ENSMUSG00000018733	275.121	0.477301	0.105995	4.50306	6.69807e-06	4.09413e-05	Pex12
ENSMUSG00000032105	77.9045	2.48236	0.551431	4.50167	6.74227e-06	4.11705e-05	Pdzd3
ENSMUSG00000082330	5.26384	2.02332	0.449553	4.50074	6.77177e-06	4.13096e-05	Ldha-ps
ENSMUSG00000007035	205.902	0.898185	0.199584	4.50028	6.78641e-06	4.13784e-05	Msh5
ENSMUSG00000022752	3140.9	0.647669	0.143946	4.49939	6.81503e-06	4.15323e-05	Tomm70a
ENSMUSG00000083992	12806.8	1.03132	0.229235	4.49894	6.82925e-06	4.16035e-05	Gm11478
ENSMUSG00000096953	9.9231	1.16805	0.25969	4.49788	6.86357e-06	4.17971e-05	Gm26571
ENSMUSG00000021737	1989.24	0.524111	0.116527	4.49776	6.86736e-06	4.18098e-05	Psmd6
ENSMUSG00000004788	1270.9	0.560465	0.124631	4.49698	6.89241e-06	4.19519e-05	Eif2b2
ENSMUSG00000023330	158.396	0.625624	0.139126	4.49681	6.89812e-06	4.19655e-05	Dtwd1
ENSMUSG00000049411	190.205	0.718672	0.159826	4.49659	6.90525e-06	4.19677e-05	Tmem241
ENSMUSG00000050014	124.9	2.41838	0.537895	4.49601	6.92418e-06	4.20619e-05	Apol10b
ENSMUSG00000111422	8.76389	1.98201	0.441011	4.49424	6.98201e-06	4.24027e-05	AC153536,3
ENSMUSG00000081467	8.12534	2.03132	0.452	4.49406	6.98772e-06	4.24269e-05	Gm13337
ENSMUSG00000104166	89.8472	1.55785	0.34673	4.49297	7.02351e-06	4.26021e-05	Gm38247
ENSMUSG00000104043	10.3832	1.87968	0.418418	4.49235	7.04413e-06	4.27166e-05	Gm6525
ENSMUSG00000029247	3271.18	0.775361	0.172602	4.49218	7.04974e-06	4.27401e-05	Paics
ENSMUSG00000000902	1588.21	0.542065	0.120682	4.49167	7.0667e-06	4.28324e-05	Smarcb1
ENSMUSG00000007656	2095.64	0.667313	0.148613	4.49028	7.113e-06	4.31024e-05	Arpp19
ENSMUSG00000003868	2128.98	0.943879	0.210217	4.49002	7.12158e-06	4.31438e-05	Ruvbl2
ENSMUSG00000027746	987.437	0.433415	0.0965422	4.48938	7.14308e-06	4.3242e-05	Ufm1
ENSMUSG00000036805	11.2509	3.80101	0.84666	4.48942	7.14187e-06	4.3242e-05	Noxa1
ENSMUSG00000113294	21.8975	0.900426	0.20062	4.48821	7.18226e-06	4.34578e-05	AC154636,1
ENSMUSG00000038388	921.475	0.874392	0.194836	4.48783	7.19521e-06	4.35246e-05	Mpp6
ENSMUSG00000028874	655.21	1.02756	0.229057	4.48604	7.25597e-06	4.3839e-05	Fgr
ENSMUSG00000032436	3281.91	1.15384	0.25731	4.48422	7.31823e-06	4.41935e-05	Cmtm7
ENSMUSG00000063087	14.4855	1.4747	0.328998	4.48242	7.38023e-06	4.4557e-05	Gm10125
ENSMUSG00000032867	912.293	1.73171	0.386345	4.48229	7.38475e-06	4.45732e-05	Fbxw8
ENSMUSG00000024565	16.9197	5.63221	1.25675	4.48158	7.40941e-06	4.47002e-05	Sall3
ENSMUSG00000058444	963.253	0.298012	0.0665178	4.48019	7.45783e-06	4.49702e-05	Map2k5
ENSMUSG00000067344	292.845	1.2072	0.269493	4.47954	7.48029e-06	4.50946e-05	Rps25-ps1
ENSMUSG00000096699	55.9893	1.46605	0.327373	4.47822	7.52693e-06	4.53424e-05	Rps19-ps4
ENSMUSG00000083364	45.0531	0.972043	0.217085	4.4777	7.54524e-06	4.54358e-05	Llph-ps2
ENSMUSG00000039067	2162.19	0.55588	0.124148	4.47756	7.55027e-06	4.54496e-05	Psmd7
ENSMUSG00000083624	25.2189	2.0755	0.463616	4.47677	7.57822e-06	4.55954e-05	Gm12469
ENSMUSG00000021091	1641.86	2.06585	0.46147	4.47668	7.58135e-06	4.56031e-05	Serpina3n
ENSMUSG00000029014	1967.58	0.602252	0.134625	4.47356	7.69277e-06	4.62507e-05	Dnajc2
ENSMUSG00000030089	252.698	1.57831	0.352984	4.47135	7.77284e-06	4.66636e-05	Slc41a3
ENSMUSG00000084169	12.167	2.44209	0.546642	4.46744	7.9161e-06	4.74657e-05	Gm12240
ENSMUSG00000071207	4.45486	2.47609	0.55426	4.46738	7.91844e-06	4.74681e-05	Gm8587
ENSMUSG00000061863	38.1849	1.57463	0.35267	4.46488	8.0113e-06	4.7978e-05	Gm6822
ENSMUSG00000024120	1671.43	0.559023	0.125238	4.4637	8.05557e-06	4.82056e-05	Lrpprc
ENSMUSG00000081926	49.3404	2.00582	0.449492	4.46241	8.10437e-06	4.84763e-05	Gm15536
ENSMUSG00000020183	128.741	1.70126	0.381528	4.45906	8.2318e-06	4.91787e-05	Cpm
ENSMUSG00000085893	20.8946	1.80616	0.405323	4.45611	8.34587e-06	4.9836e-05	Gm12091
ENSMUSG00000035000	2679.92	1.21393	0.27253	4.45432	8.41584e-06	5.01684e-05	Dpp4
ENSMUSG00000025731	372.746	0.594895	0.133565	4.45397	8.4295e-06	5.02377e-05	Mettl26
ENSMUSG00000026229	2600.13	0.507604	0.113998	4.45274	8.47828e-06	5.05079e-05	Psmd1
ENSMUSG00000081604	97.0976	1.33091	0.298898	4.45272	8.47895e-06	5.05079e-05	Gm11518
ENSMUSG00000107261	23.5264	1.51001	0.339156	4.45226	8.49701e-06	5.05787e-05	Trmt112-ps1
ENSMUSG00000044348	170.962	1.85584	0.417006	4.45039	8.57157e-06	5.10102e-05	Slc25a53
ENSMUSG00000076752	3093.35	2.70101	0.606927	4.4503	8.57493e-06	5.10178e-05	Tcrg-C2
ENSMUSG00000027404	6411.78	0.781084	0.1756	4.44808	8.66398e-06	5.1448e-05	Snrpb
ENSMUSG00000022463	5791.25	0.803912	0.180747	4.44772	8.67876e-06	5.15109e-05	Srebf2
ENSMUSG00000051331	323.225	3.2542	0.73174	4.44721	8.69908e-06	5.16191e-05	Cacna1c
ENSMUSG00000112825	188.476	1.14665	0.257897	4.44615	8.74213e-06	5.18494e-05	AC152949,2
ENSMUSG00000059775	201.45	0.929114	0.209092	4.44356	8.84842e-06	5.24166e-05	Rps26-ps1
ENSMUSG00000002814	609.375	0.502789	0.113156	4.44331	8.85839e-06	5.2463e-05	Top3a
ENSMUSG00000001436	557.186	0.908265	0.204483	4.44177	8.92226e-06	5.27904e-05	Slc19a1
ENSMUSG00000079311	30.0011	1.0888	0.245154	4.4413	8.94174e-06	5.28929e-05	Gm3222
ENSMUSG00000095788	11.5096	2.31104	0.52057	4.43943	9.01958e-06	5.33021e-05	Sirpb1a
ENSMUSG00000000568	6420.91	0.80072	0.180413	4.43827	9.06867e-06	5.35664e-05	Hnrnpd
ENSMUSG00000082632	20.6329	1.82963	0.412279	4.43784	9.08678e-06	5.36604e-05	Gm13365
ENSMUSG00000083483	29.6127	2.08951	0.470956	4.43673	9.1334e-06	5.3897e-05	Gm14044
ENSMUSG00000086765	14.8114	2.67206	0.60232	4.43628	9.15283e-06	5.39857e-05	Gm11827
ENSMUSG00000031799	1771.28	0.478833	0.107955	4.4355	9.1857e-06	5.41535e-05	Tpm4
ENSMUSG00000104496	222.492	0.680643	0.153485	4.43458	9.22503e-06	5.43723e-05	Gm5837
ENSMUSG00000084880	22.0523	1.18884	0.26815	4.43351	9.27105e-06	5.46174e-05	Tomm6os
ENSMUSG00000087589	28.9772	1.36371	0.307605	4.43332	9.27909e-06	5.46517e-05	D430040D24Rik
ENSMUSG00000002957	1929.75	0.351266	0.0792431	4.43276	9.3035e-06	5.47823e-05	Ap2a2
ENSMUSG00000113240	40.4183	1.02126	0.230394	4.43265	9.30807e-06	5.47961e-05	AC126799,1
ENSMUSG00000097643	38.9718	1.21543	0.274203	4.43259	9.31072e-06	5.47986e-05	A130051J06Rik
ENSMUSG00000022098	269.82	1.21296	0.273683	4.43199	9.33671e-06	5.49384e-05	Bmp1
ENSMUSG00000022176	64.96	2.04123	0.460618	4.43151	9.35764e-06	5.50483e-05	Rem2
ENSMUSG00000074108	26.4674	1.63676	0.369373	4.4312	9.37115e-06	5.51147e-05	Rpl10-ps2
ENSMUSG00000001285	1086.55	1.23586	0.278989	4.42979	9.43249e-06	5.54489e-05	Myg1
ENSMUSG00000102908	7.71823	3.15223	0.71166	4.4294	9.44951e-06	5.55356e-05	Gm7558
ENSMUSG00000079036	763.553	0.62107	0.140236	4.42875	9.47797e-06	5.56896e-05	Alkbh1
ENSMUSG00000092358	47.8346	1.92318	0.434447	4.42673	9.56742e-06	5.62017e-05	Gm20430
ENSMUSG00000073640	13.2693	1.78632	0.40355	4.42651	9.57711e-06	5.62452e-05	Rpl27-ps3
ENSMUSG00000091460	194.582	1.48481	0.335467	4.42611	9.59473e-06	5.63218e-05	Gm7808
ENSMUSG00000022427	2619.43	0.904219	0.204306	4.42582	9.60777e-06	5.63714e-05	Tomm22
[truncated: 2,140 more rows]
