# Supplementary material for: High Expression of PPM1D Induces Tumors Phenotypically Similar to TP53 Loss-of-Function Mutations in Mice
Source: Cancers (Basel). 2021 Oct 31;13(21):5493. doi: 10.3390/cancers13215493 (PMC8582939; doi:10.3390/cancers13215493)
Supplement: Supplementary file 1 [file cancers-13-05493-s001.zip › Supp Table S3 (related to materials and methods).xlsx]

## Sheet: Table S3
Table S3. List of antibodies used in mouse tissue analysis by Western blot, Related to materials and methods
Antibody	Manufacturer	Cat No	Blocking solution	Antibody dilution	Antibody specie
phospho p53	Cell Signaling	9284	5% milk in TBS-T	0.736111	RABBIT
p53	Cell Signaling	9282	5% milk in TBS-T	0.736111	RABBIT
p53 (D2H9O)	Cell Signaling	32532	5% milk in TBS-T	0.736111	RABBIT
WIP1	Cell Signaling	11901	5% BSA in TBS-T	0.736111	RABBIT
WIP1 (H300)	Santa Cruz Biotechnology	SC20712	5% milk in TBS-T	0.180556	RABBIT
GAPDH	Abcam	ab8245	5% milk in TBS-T	1:10000	MOUSE
VINCULIN	Abcam	129002	5% milk in TBS-T	2.81944	RABBIT
Table S3. List of antibodies used in transgenic mouse tissue analysis by immunohistochemistry, Related to materials and methods.
Antibody	Manufacturer	Cat No	Antibody dilution	Antibody specie
Aktin	Thermo Fischer Scientific	PA5-19465	1:500	RABBIT
CD117/C-kit	Agilent	A450229-2	0.25	RABBIT
CD20	Cell Marque	120R-14	0.180556	RABBIT
CD3	Agilent	IS50330-2	RTU	RABBIT
CD34	Abcam	ab81289	0.180556	RABBIT
CD56	Agilent	M7304	0.180556	MOUSE
CD79	Cell Marque	179R-14	0.25	RABBIT
Chromogranin A	Abcam	ab15160	0.319444	RABBIT
Cytokeratin 20	Abcam	ab181598	1.43056	RABBIT
Dog1	Thermo Fischer Scientific	RM-9132	0.111111	RABBIT
ER	Agilent	IR151	RTU	RABBIT
ERG	Agilent	IR65961-2	RTU	RABBIT
Faktor VIII	Agilent	IR52761-2	RTU	RABBIT
HNF1B	Thermo Fischer Scientific	PA5-50531	1:200	RABBIT
LCA/CD45	Abcam	ab10558	0.388889	RABBIT
Napsin A	Biocare Medicals	ACI3043A	1:200	RABBIT
NF	Agilent	IR60761-2	RTU	MOUSE
NF	Abcam	ab204893	0.180556	RABBIT
PHOXB2	Abcam	ab183741	0.736111	RABBIT
PR	Ventana	790-2223	RTU	RABBIT
S100	Agilent	IR50461-2	0.180556	RABBIT
SATB2	Abcam	ab92446	0.180556	RABBIT
Synaptofysin	Abcam	Ab16659	01:40:00	RABBIT
TDT	Agilent	IR09361-2	RTU	RABBIT
TTF1	Abcam	ab76013	0.215278	RABBIT
Vimentin	Abcam	ab92547	0.25	RABBIT
WT1	Abcam	ab89901	0.25	RABBIT
